# Supplementary material for: BF3·OEt2 catalyzed chemoselective CC bond cleavage of α,β-enones: an unexpected synthesis of 3-alkylated oxindoles and spiro-indolooxiranes
Source: Royal Society of Chemistry journal article supplement (doi:10.1039/d1ob02002a), 2021-11-29

## **Supporting Information**

**BF<sub>3</sub>·OEt<sub>2</sub> Promoted chemoselective C=C bond cleavage of  $\alpha,\beta$ -enones:  
An unexpected synthesis of 3-alkylated oxindoles and spiro-indolooxiranes**

Sengodagounder Muthusamy\* and Ammasi Prabu

*School of Chemistry, Bharathidasan University, Tiruchirappalli-620 024, India*

\* Tel: +91-431-2407053; Fax: +91-431-2407045; E-mail: [muthu@bdu.ac.in](mailto:muthu@bdu.ac.in)

HRMS spectra for compounds **3, 3aa, 6, 7, 9a, 10, 11, 12, 13**

# Compound 3a

quino #67-74 RT: 0.69-0.75 AV: 4 SB: 36 0.17-0.47, 1.39-1.80 NL: 9.09E7  
T: FTMS + p ESI Full ms [150.0000-1500.0000]

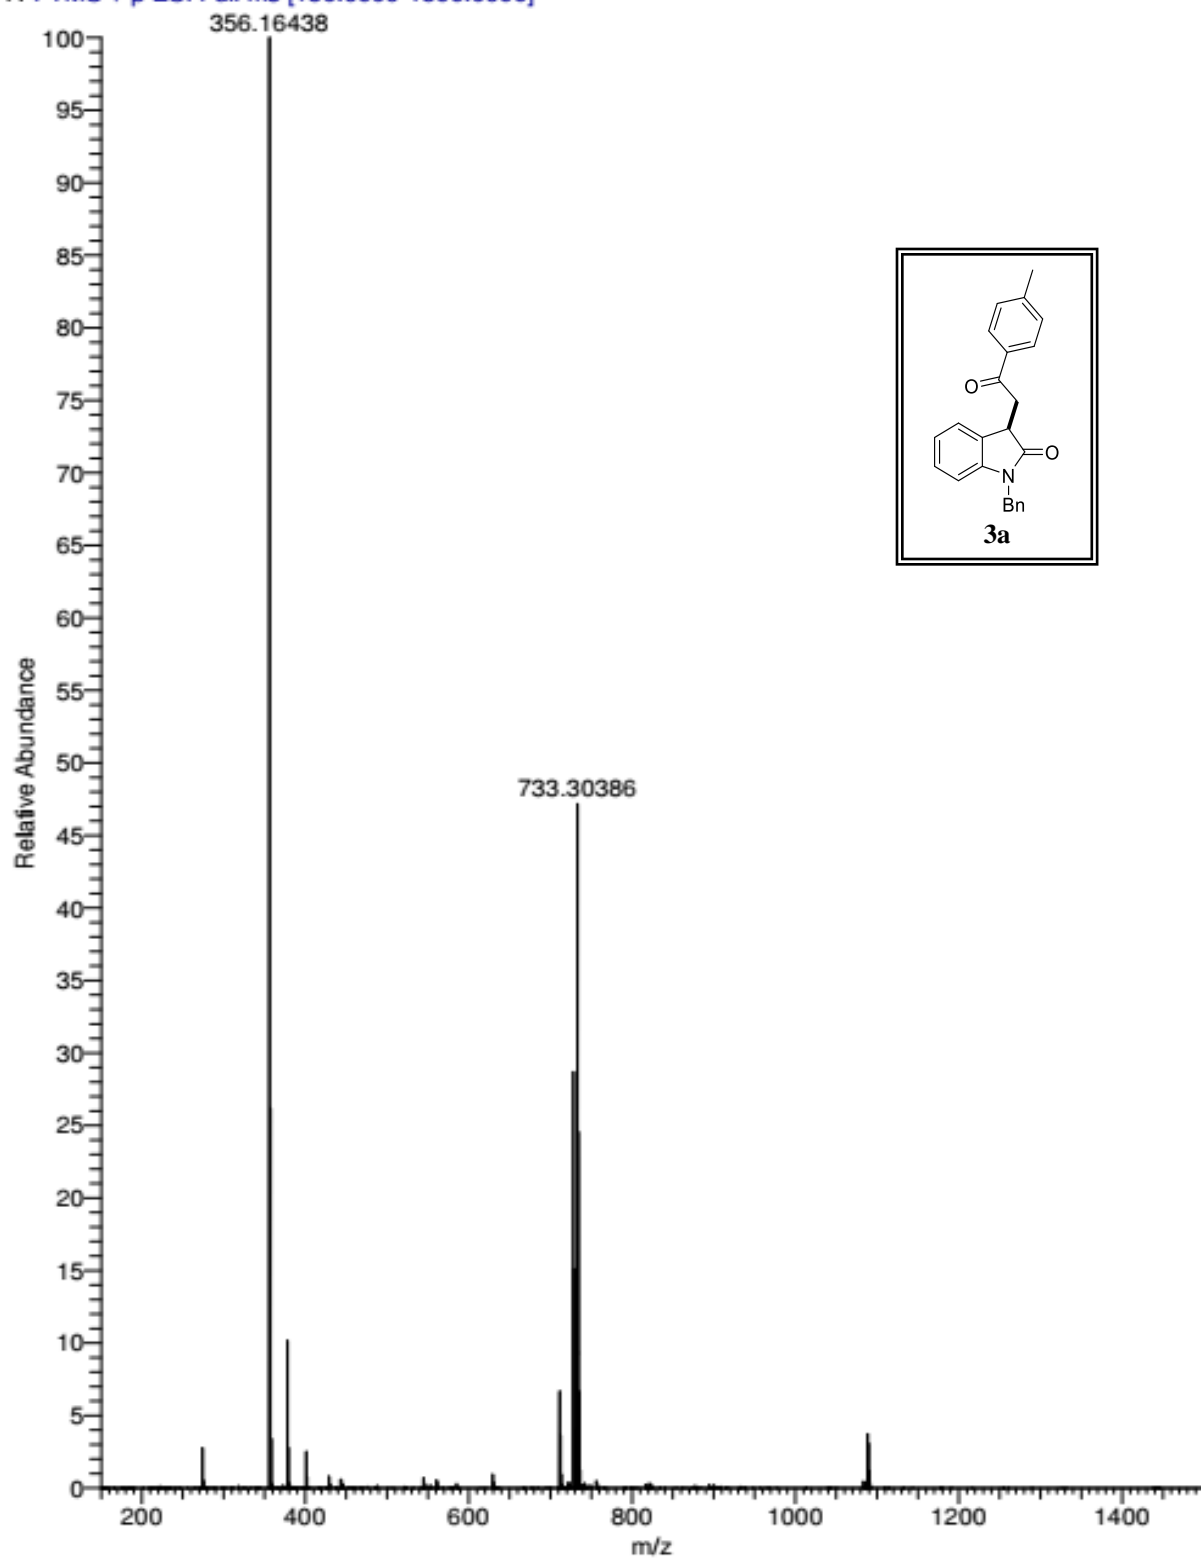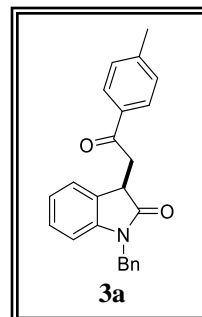

# Compound 3b

APR-12 #85 RT: 0.64 AV: 1 NL: 1.13E8  
T: FTMS + p ESI Full ms [150.0000-1000.0000]

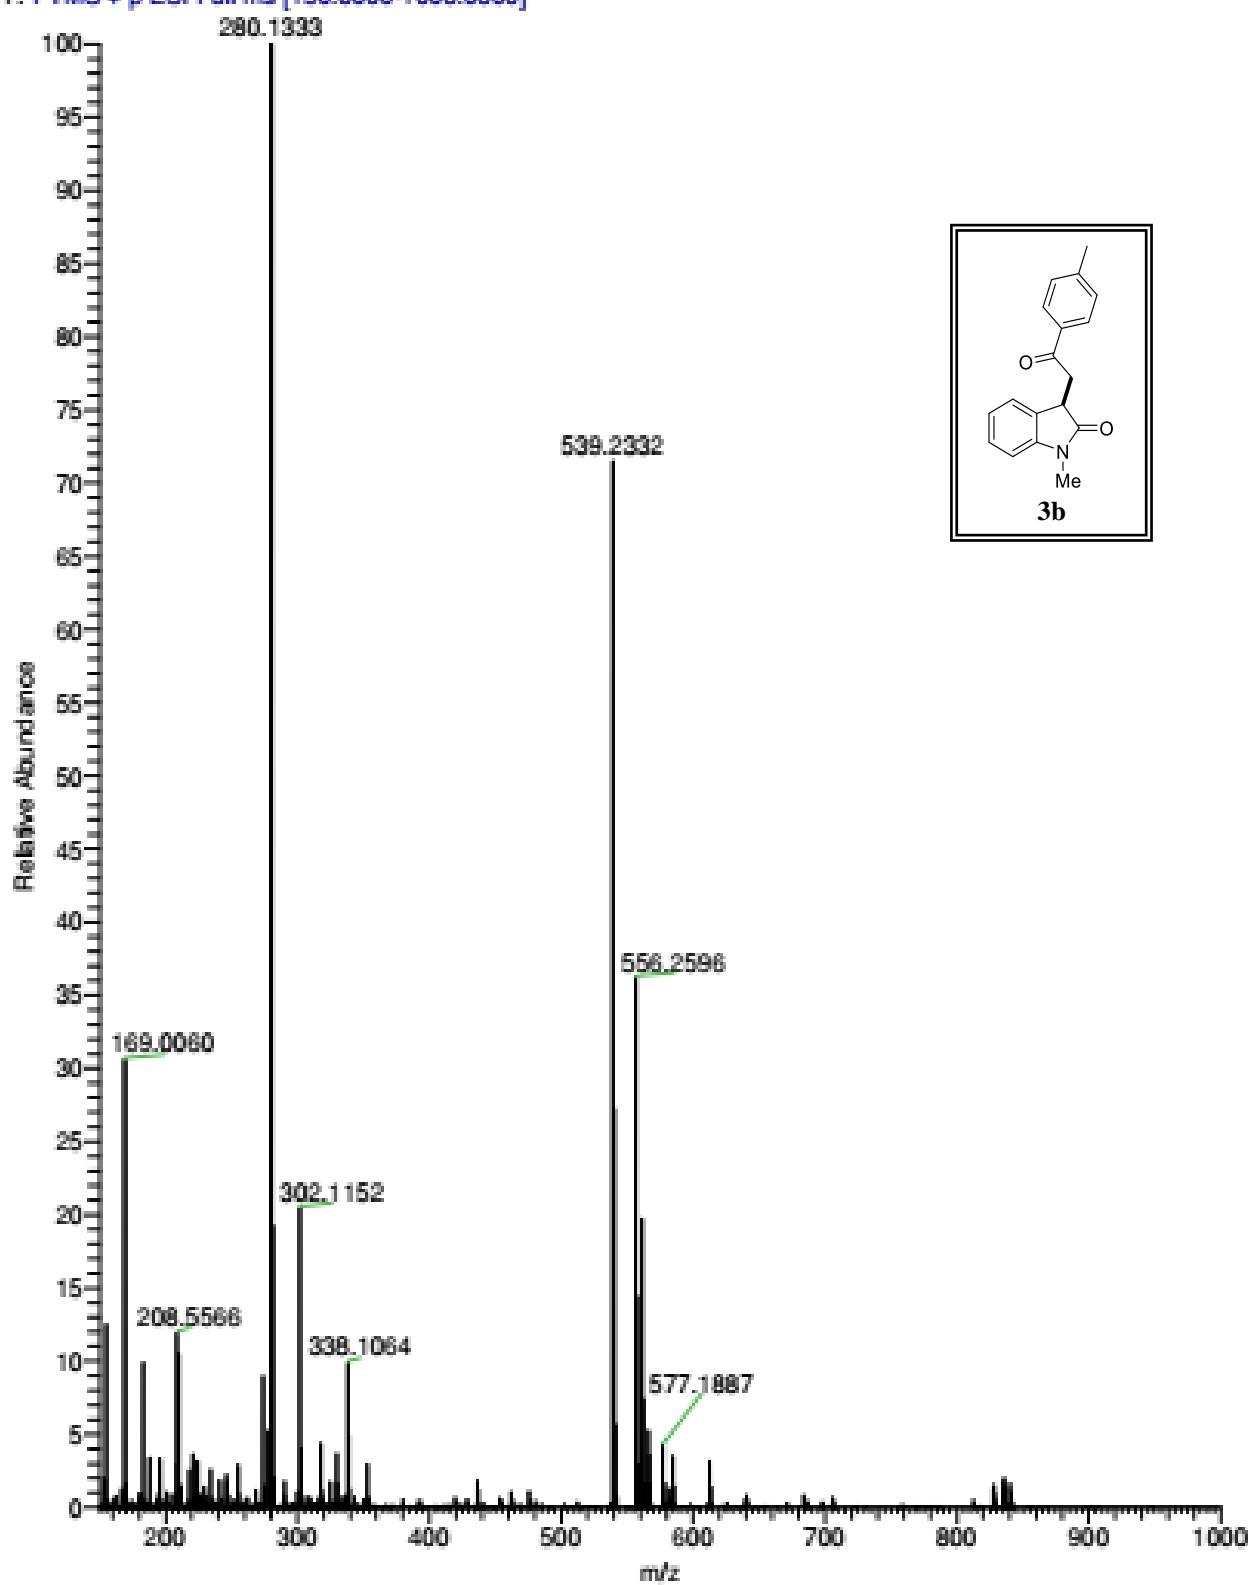

# Compound 3c

APR-144 #50 RT: 0.50 AV: 1 NL: 3.18E8  
T: FTMS + p ESI Full ms [200.0000-1000.0000]

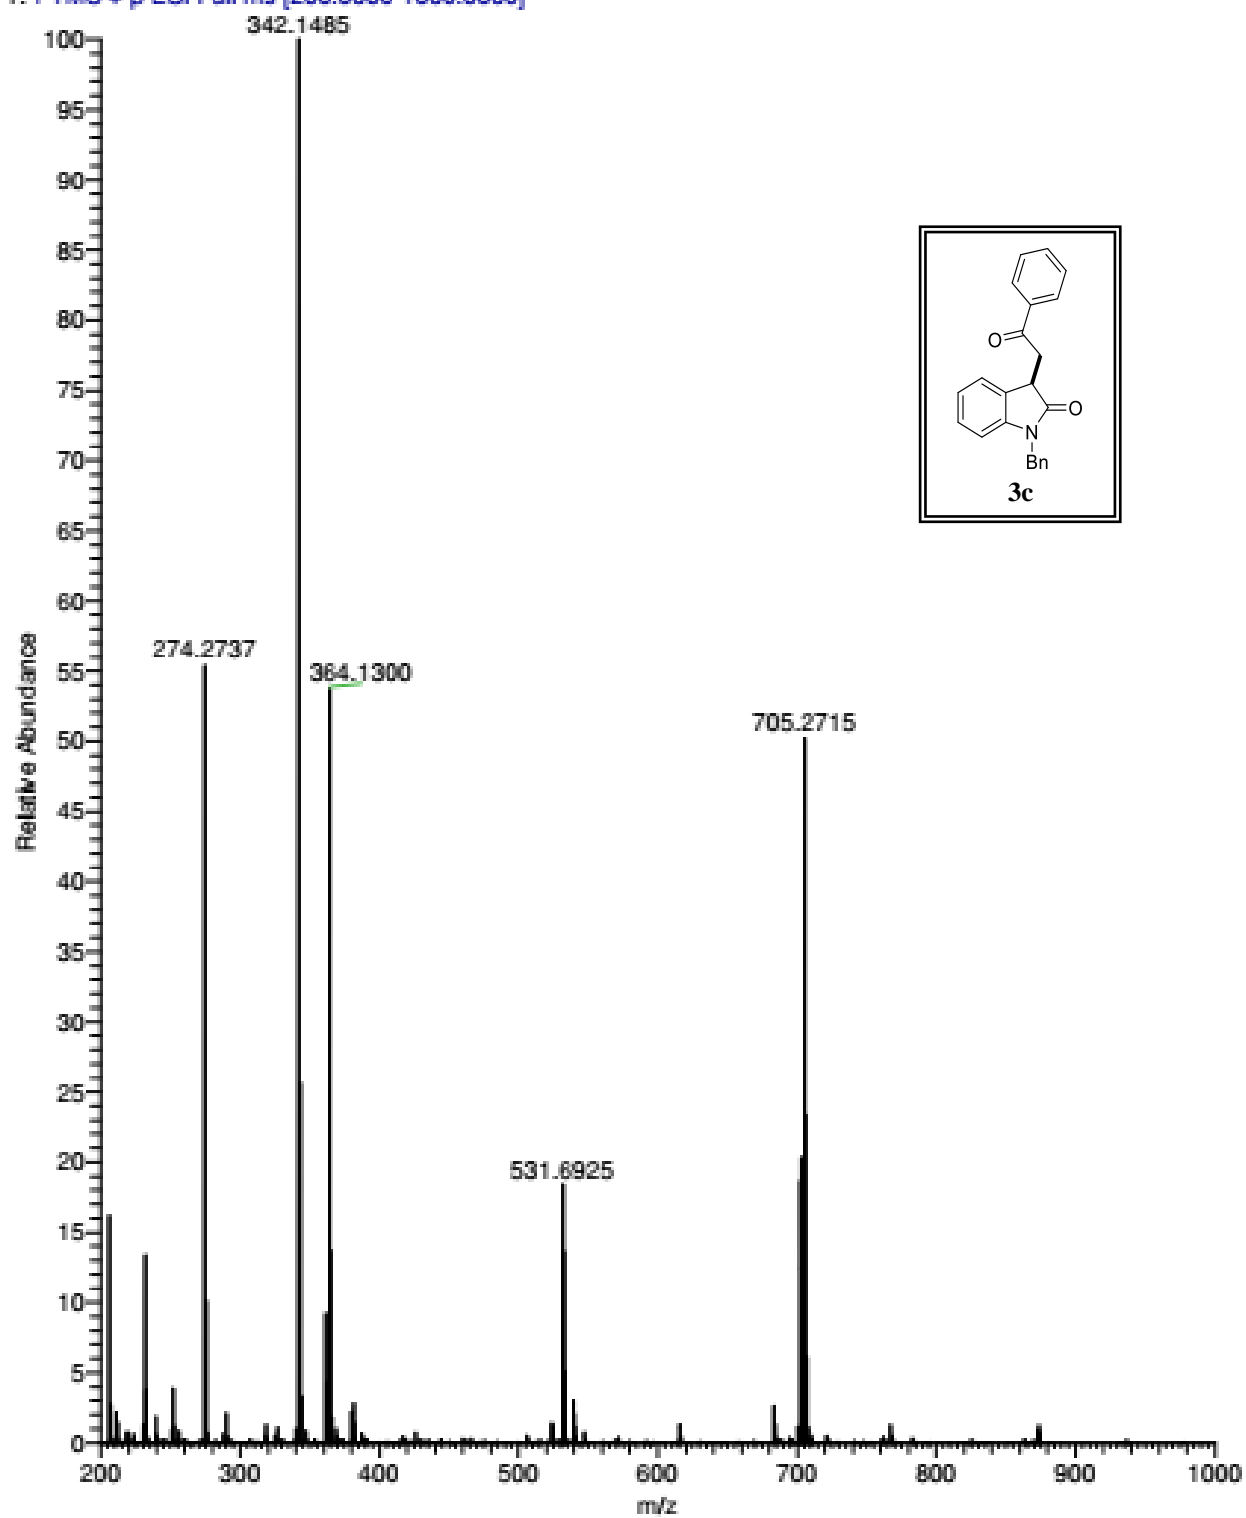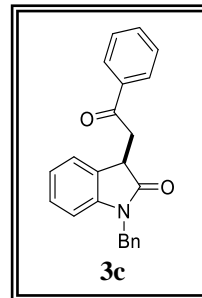

# Compound 3d

APR-348\_20190702170159 #33 RT: 0.34 AV: 1 NL: 4.17E8  
T: FTMS + p ESI Full ms [150.0000-1000.0000]

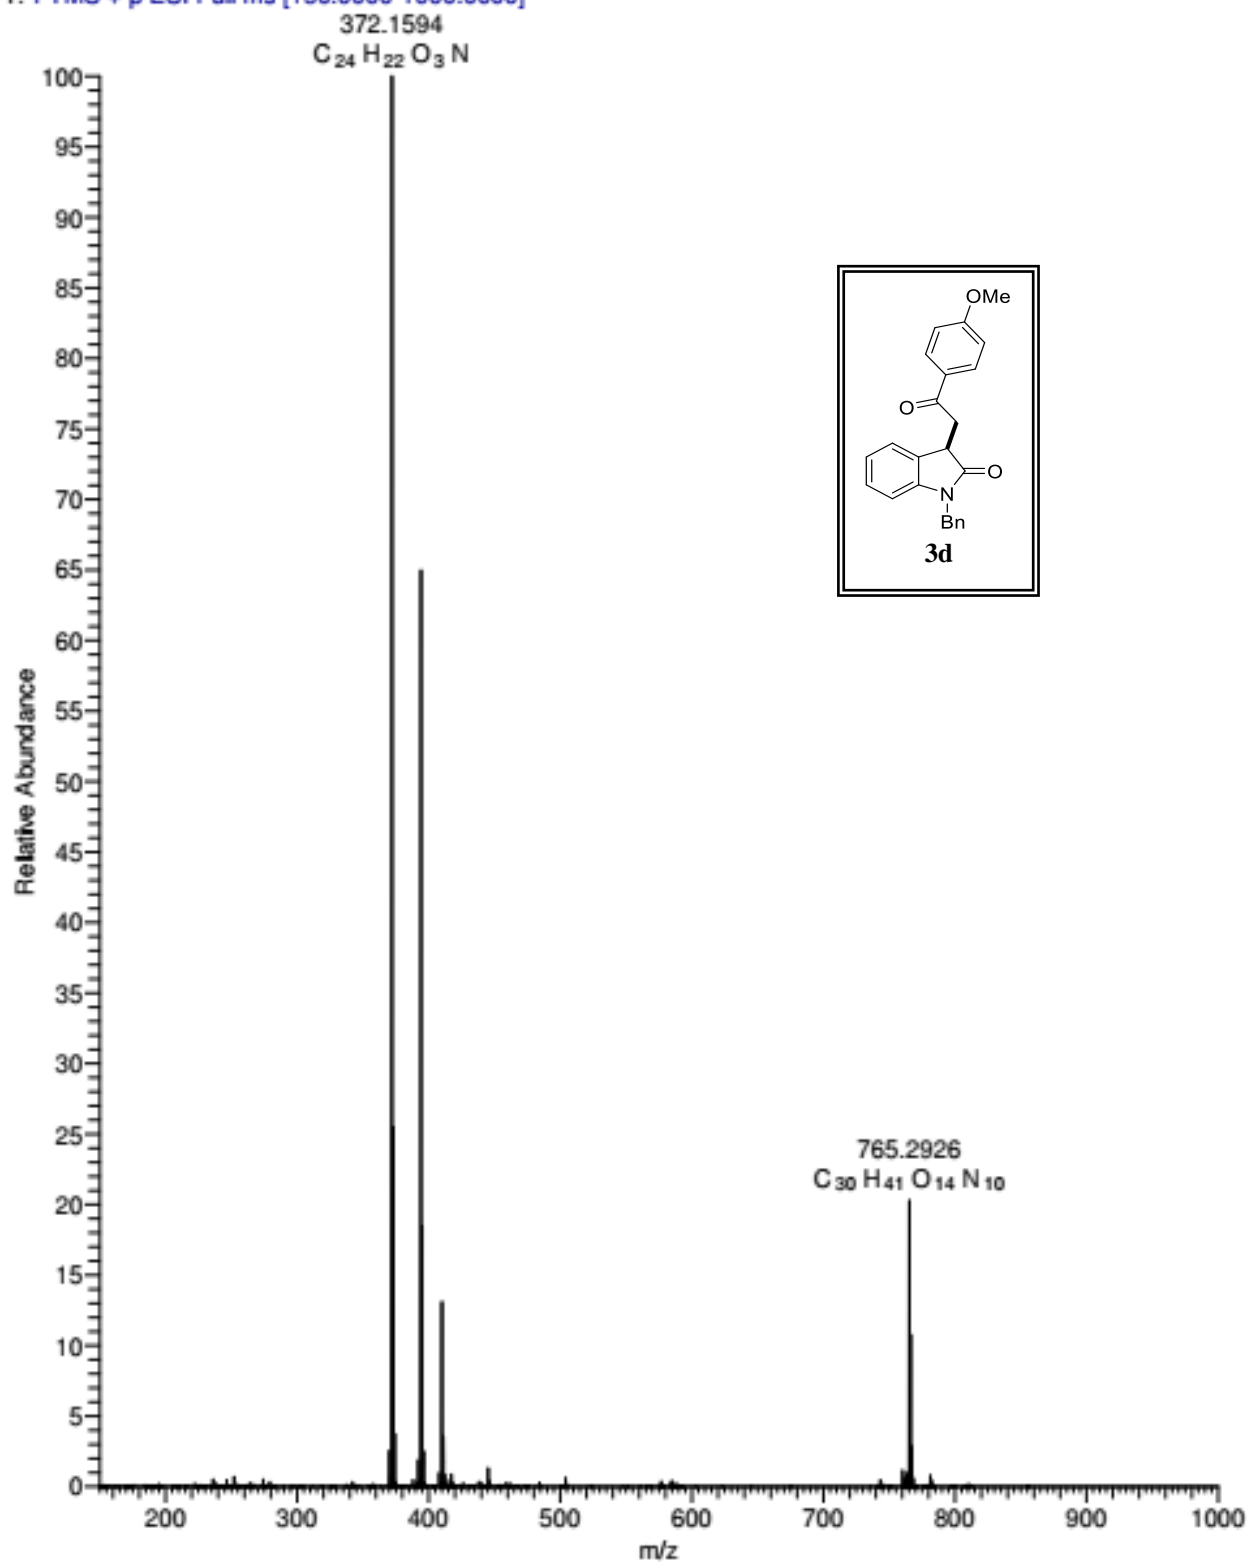

# Compound 3f

APR-365\_20190702170637 #33 RT: 0.34 AV: 1 NL: 1.13E8  
T: FTMS + p ESI Full ms [150.0000-1000.0000]

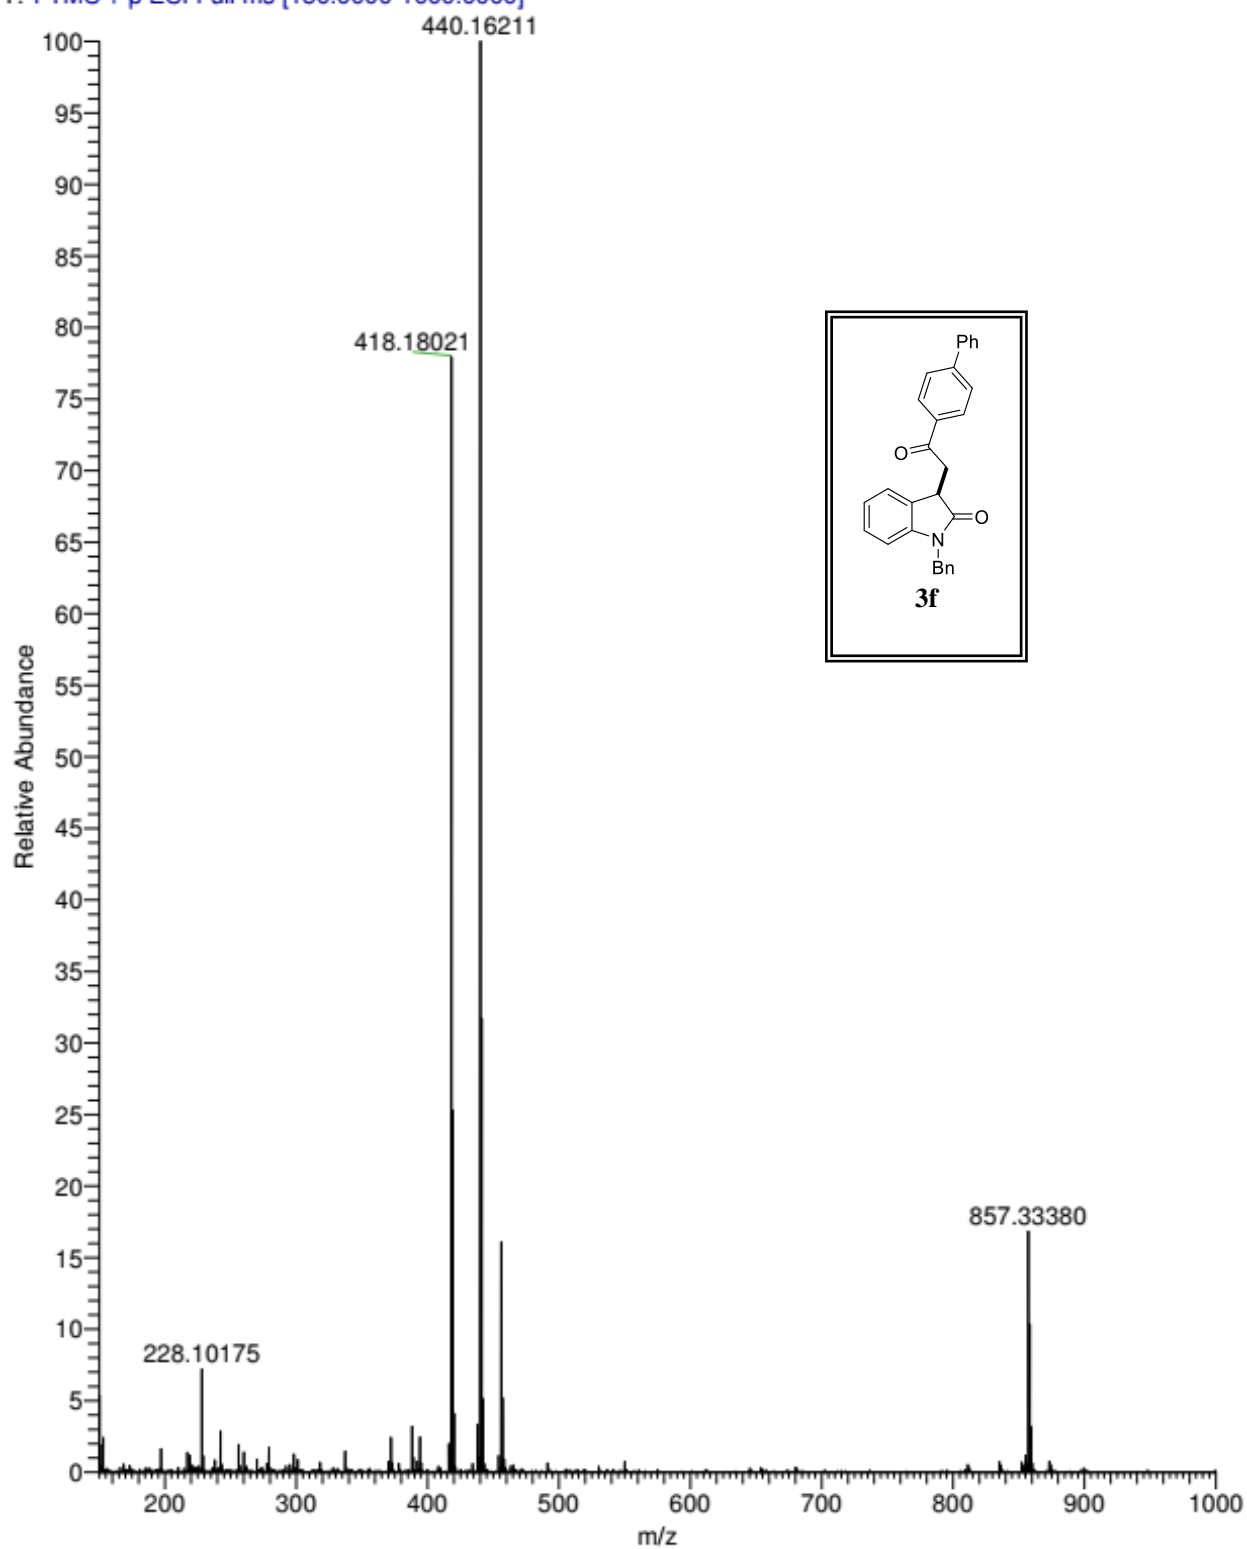

# Compound 3g

APR-384\_20190702171210 #53 RT: 0.54 AV: 1 NL: 2.79E8

T: FTMS + p ESI Full ms [150.0000-1000.0000]

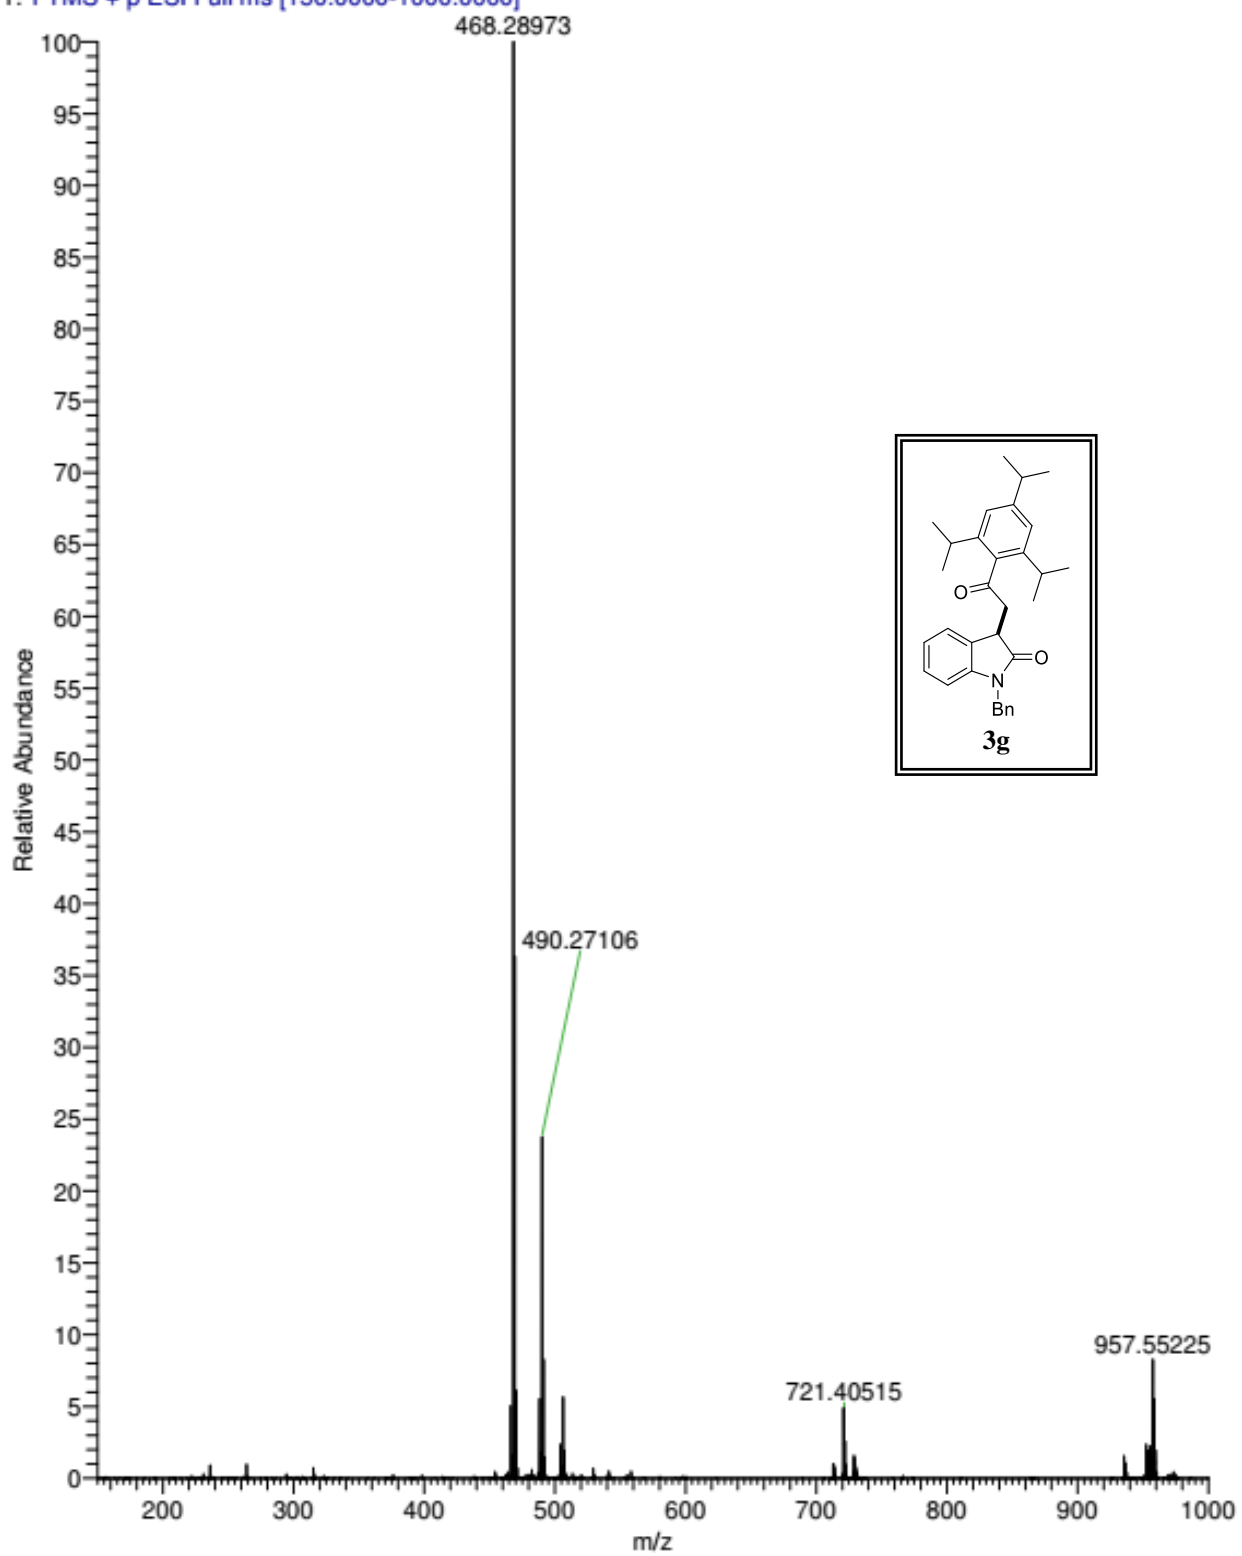

# Compound 3i

APR-41 #28 RT: 0.29 AV: 1 NL: 1.59E8  
T: FTMS + p ESI Full ms [200.0000-1000.0000]

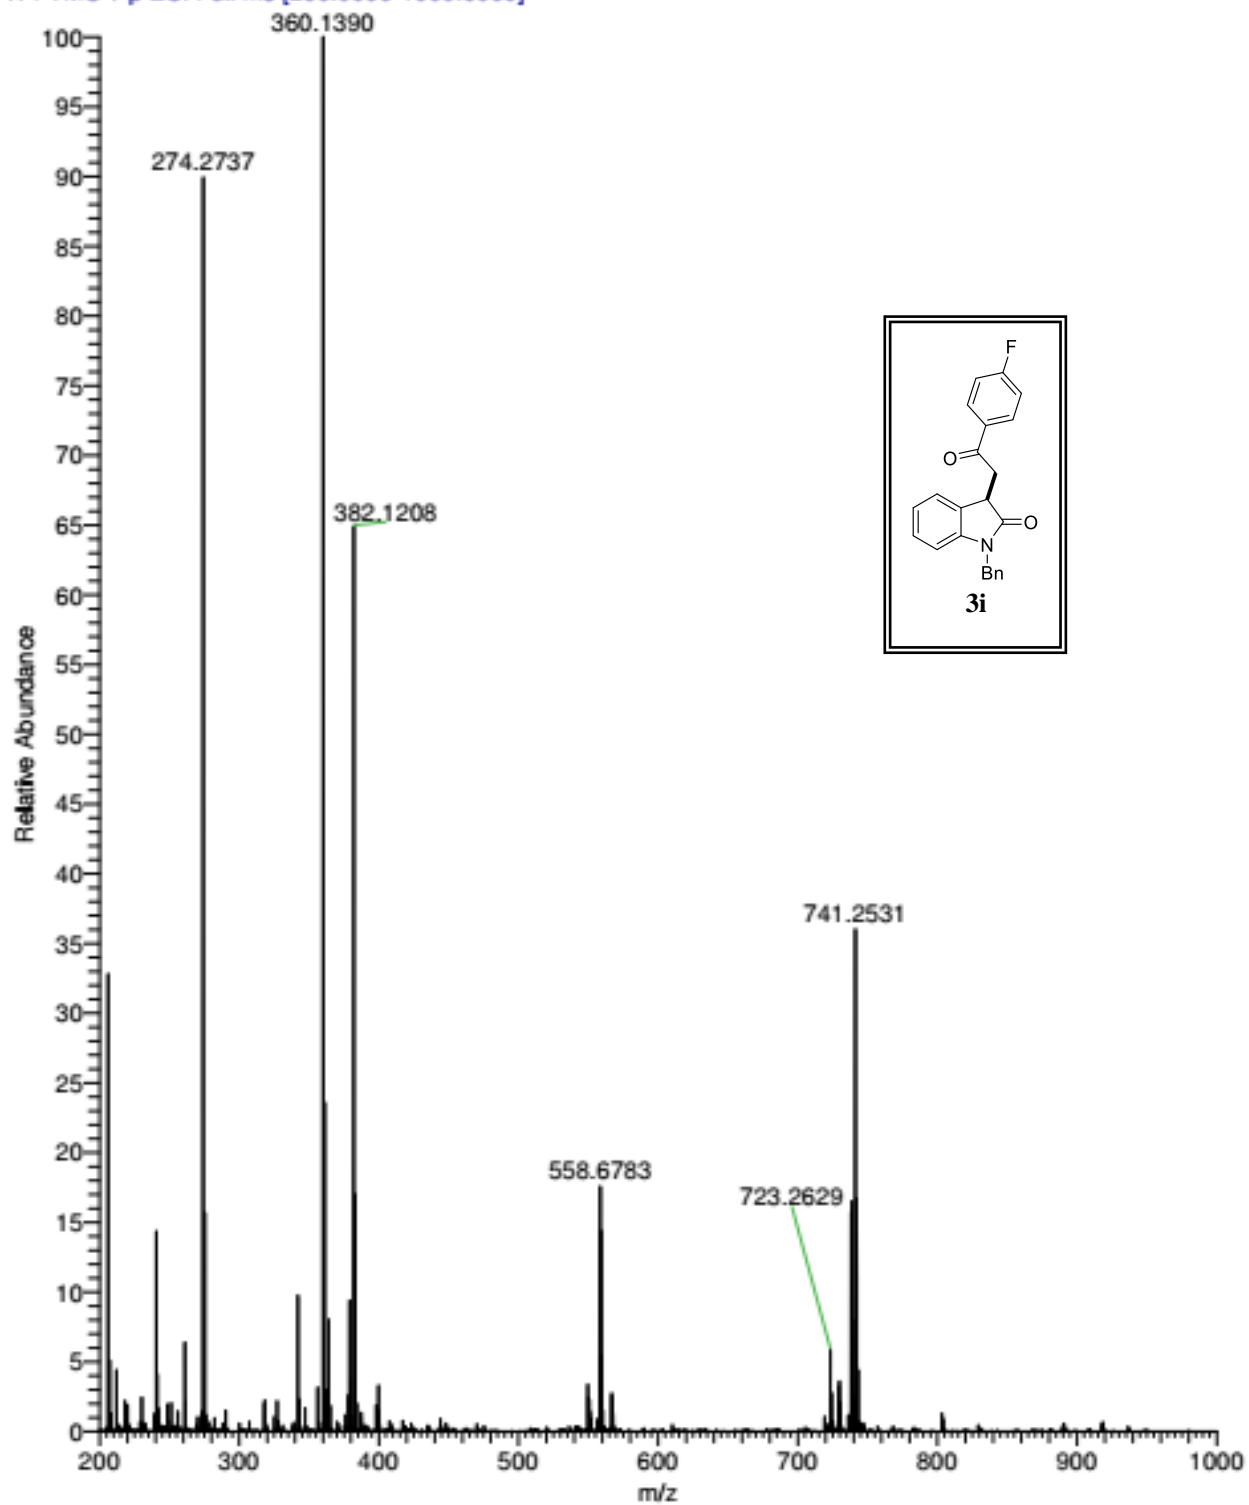



# Compound 3j

APR-151 #74 RT: 0.71 AV: 1 NL: 4.41E9  
T: FTMS + p ESI Full ms [100.0000-1500.0000]

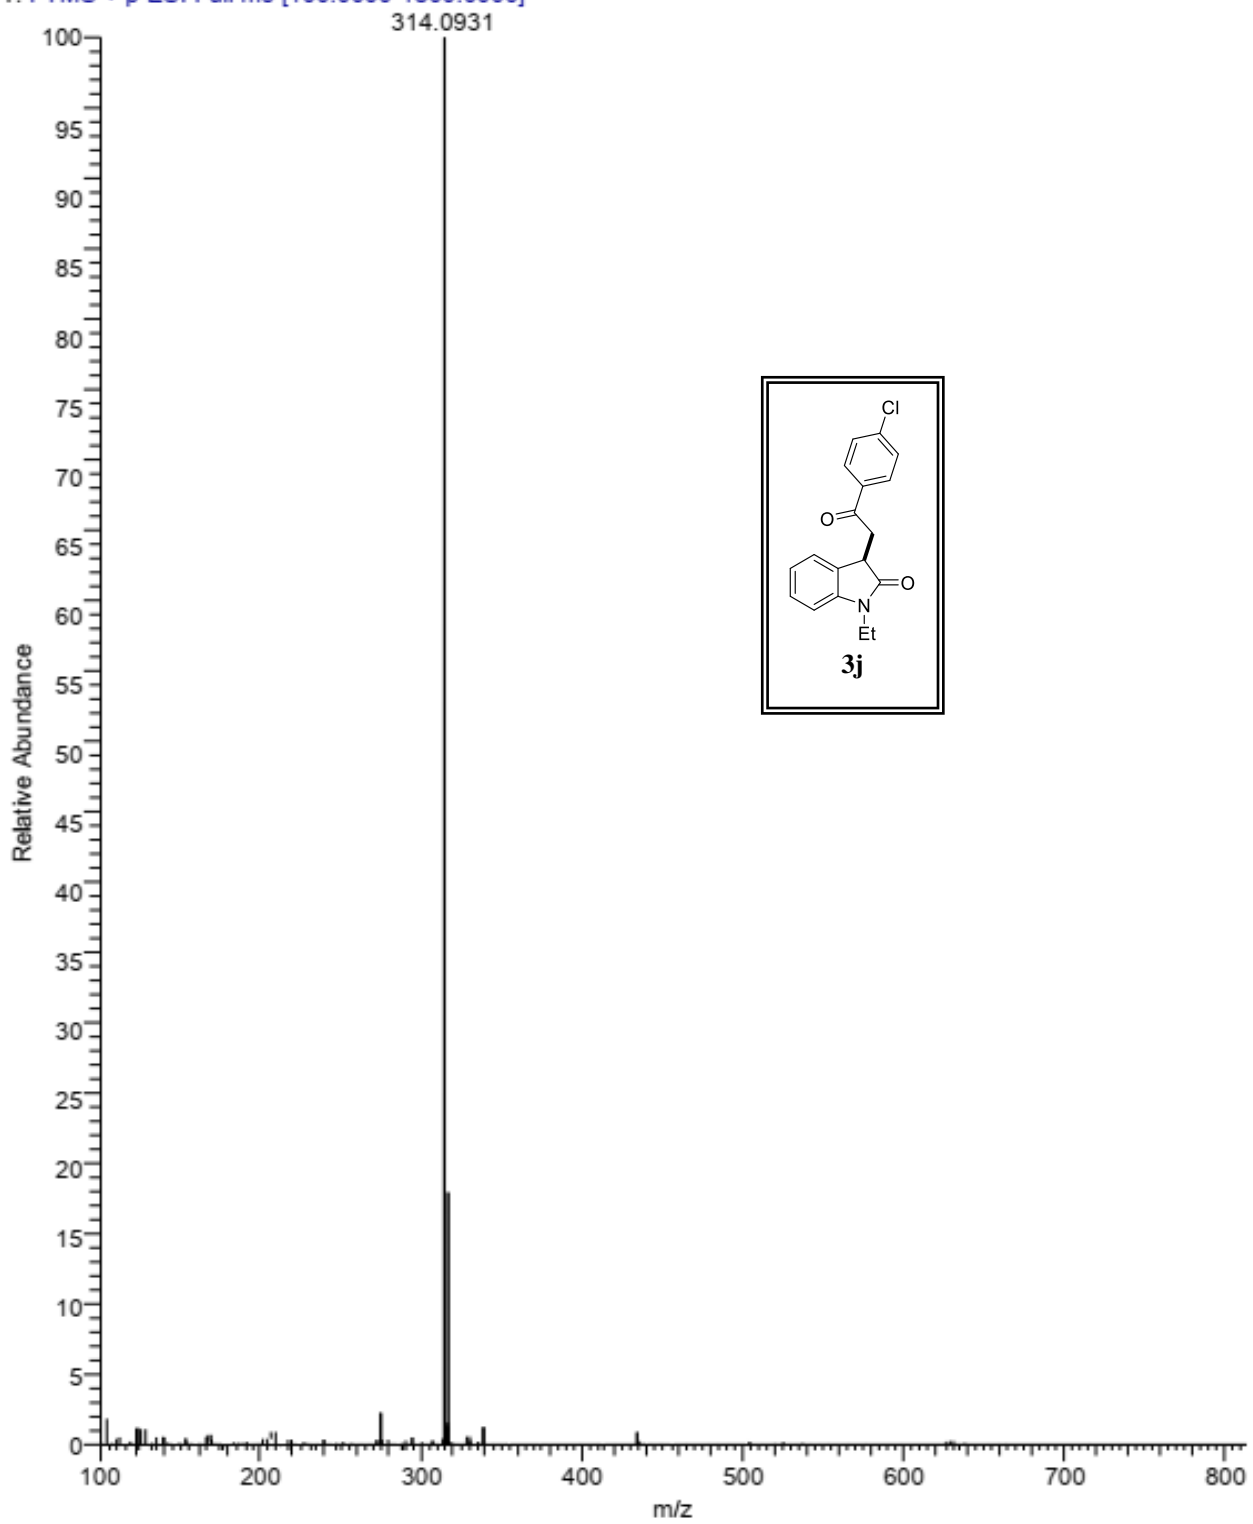

# Compound 3k

APR-562 #55 RT: 0.55 AV: 1 NL: 3.54E8  
T: FTMS + p ESI Full ms [100.0000-1000.0000]

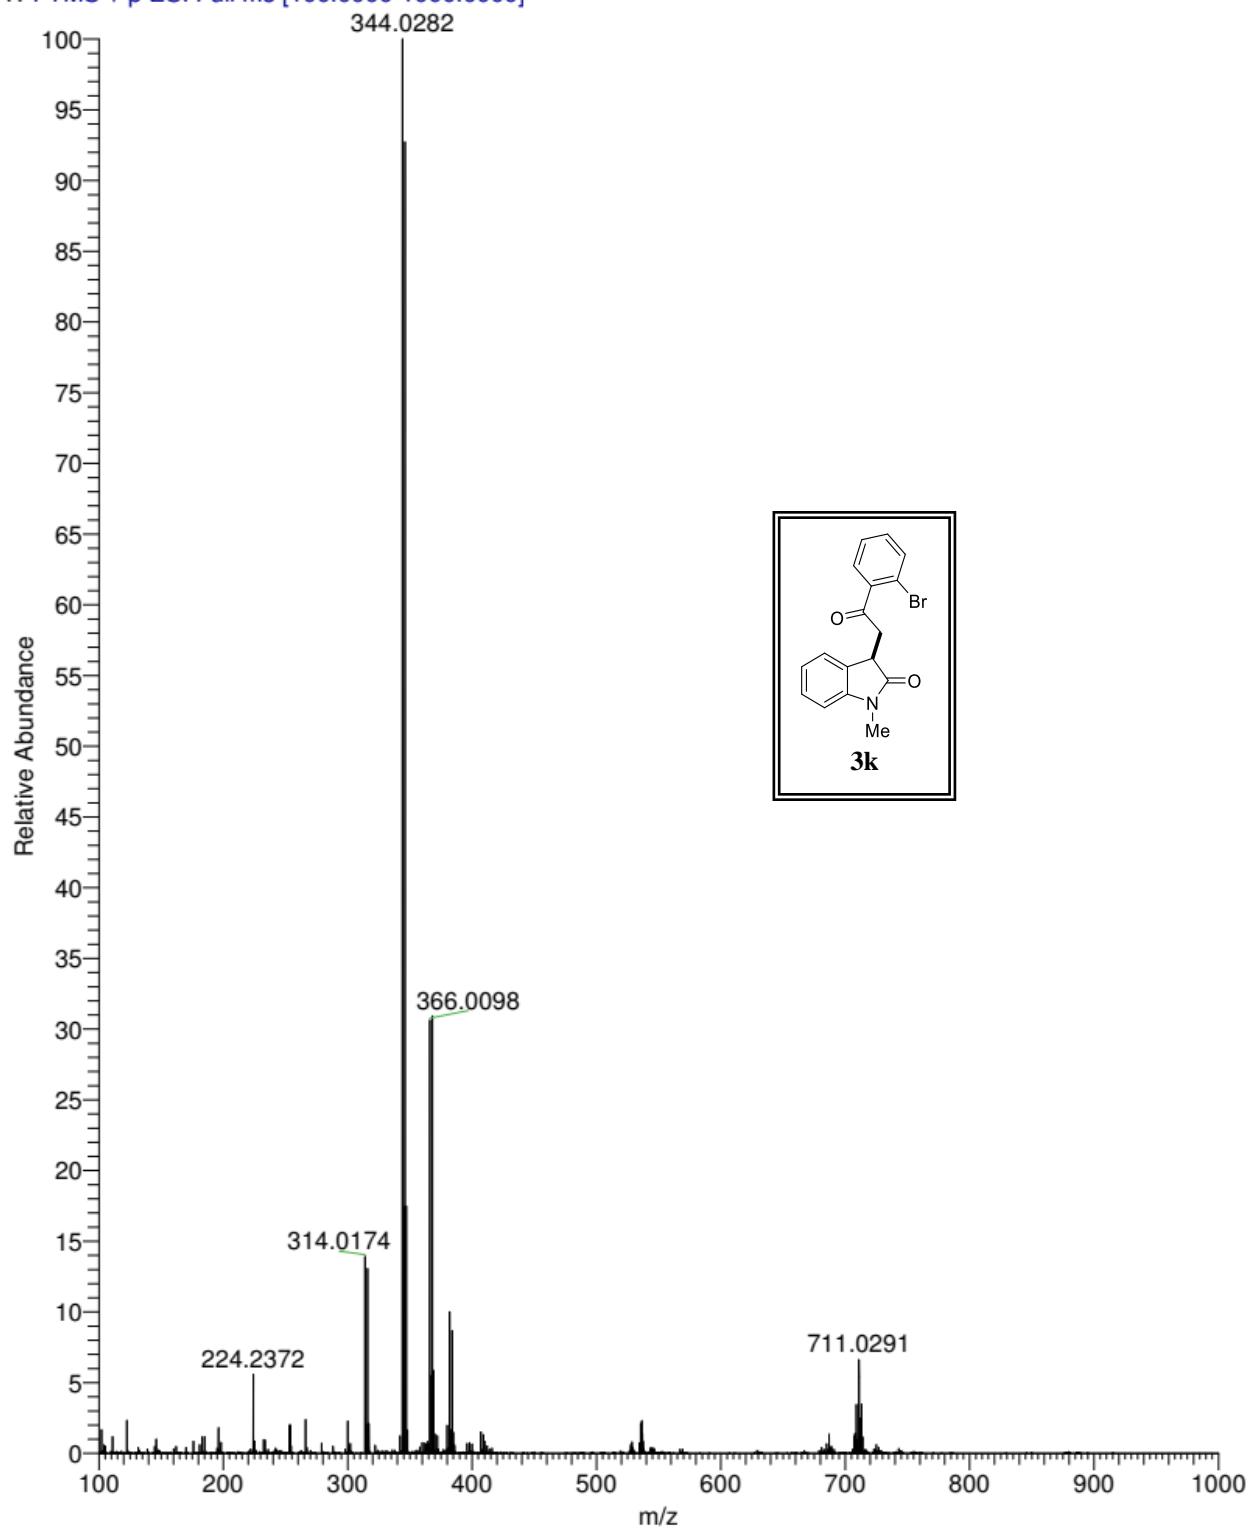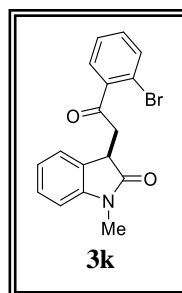

# Compound 31

APR-45 #27 RT: 0.28 AV: 1 NL: 1.95E6  
T: FTMS - p ESI Full ms [200.0000-1000.0000]

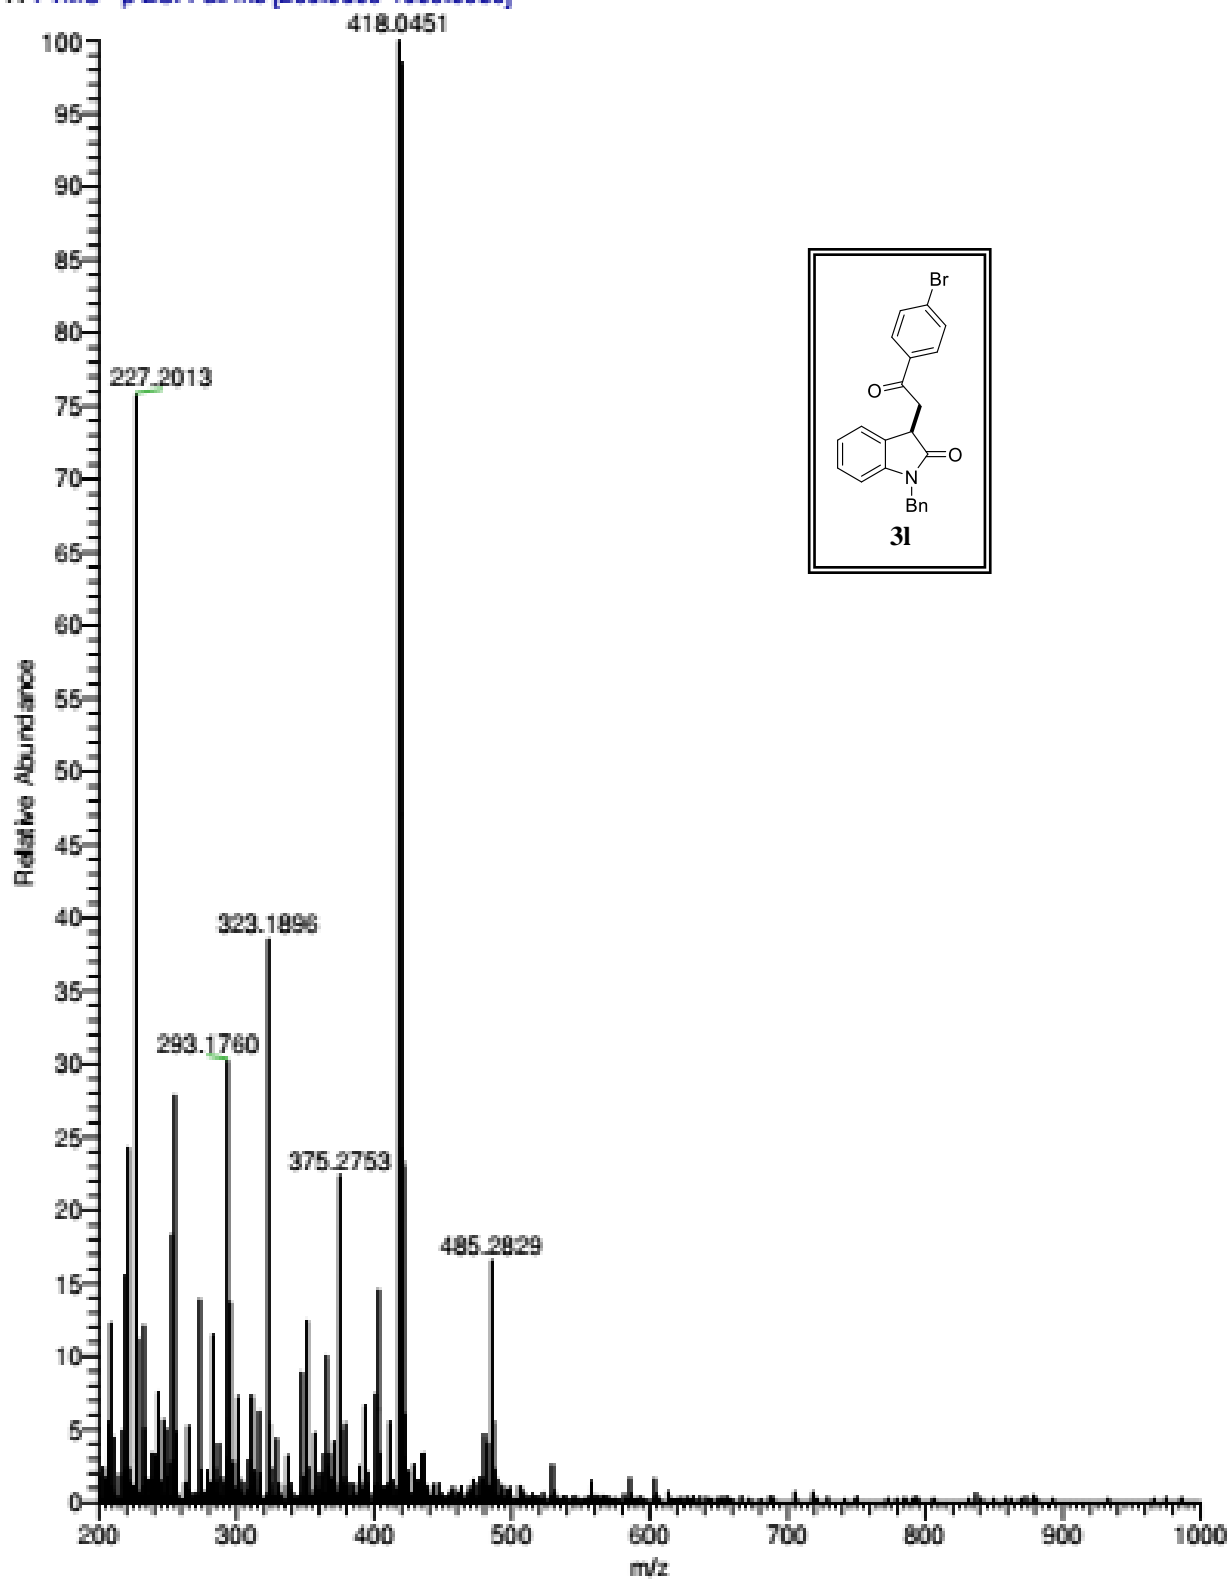

Compound **3m**

APR-562\_20210210172040 #58 RT: 0.57 AV: 1 NL: 3.77E7

T: FTMS + p ESI Full ms [133.4000-2000.0000]

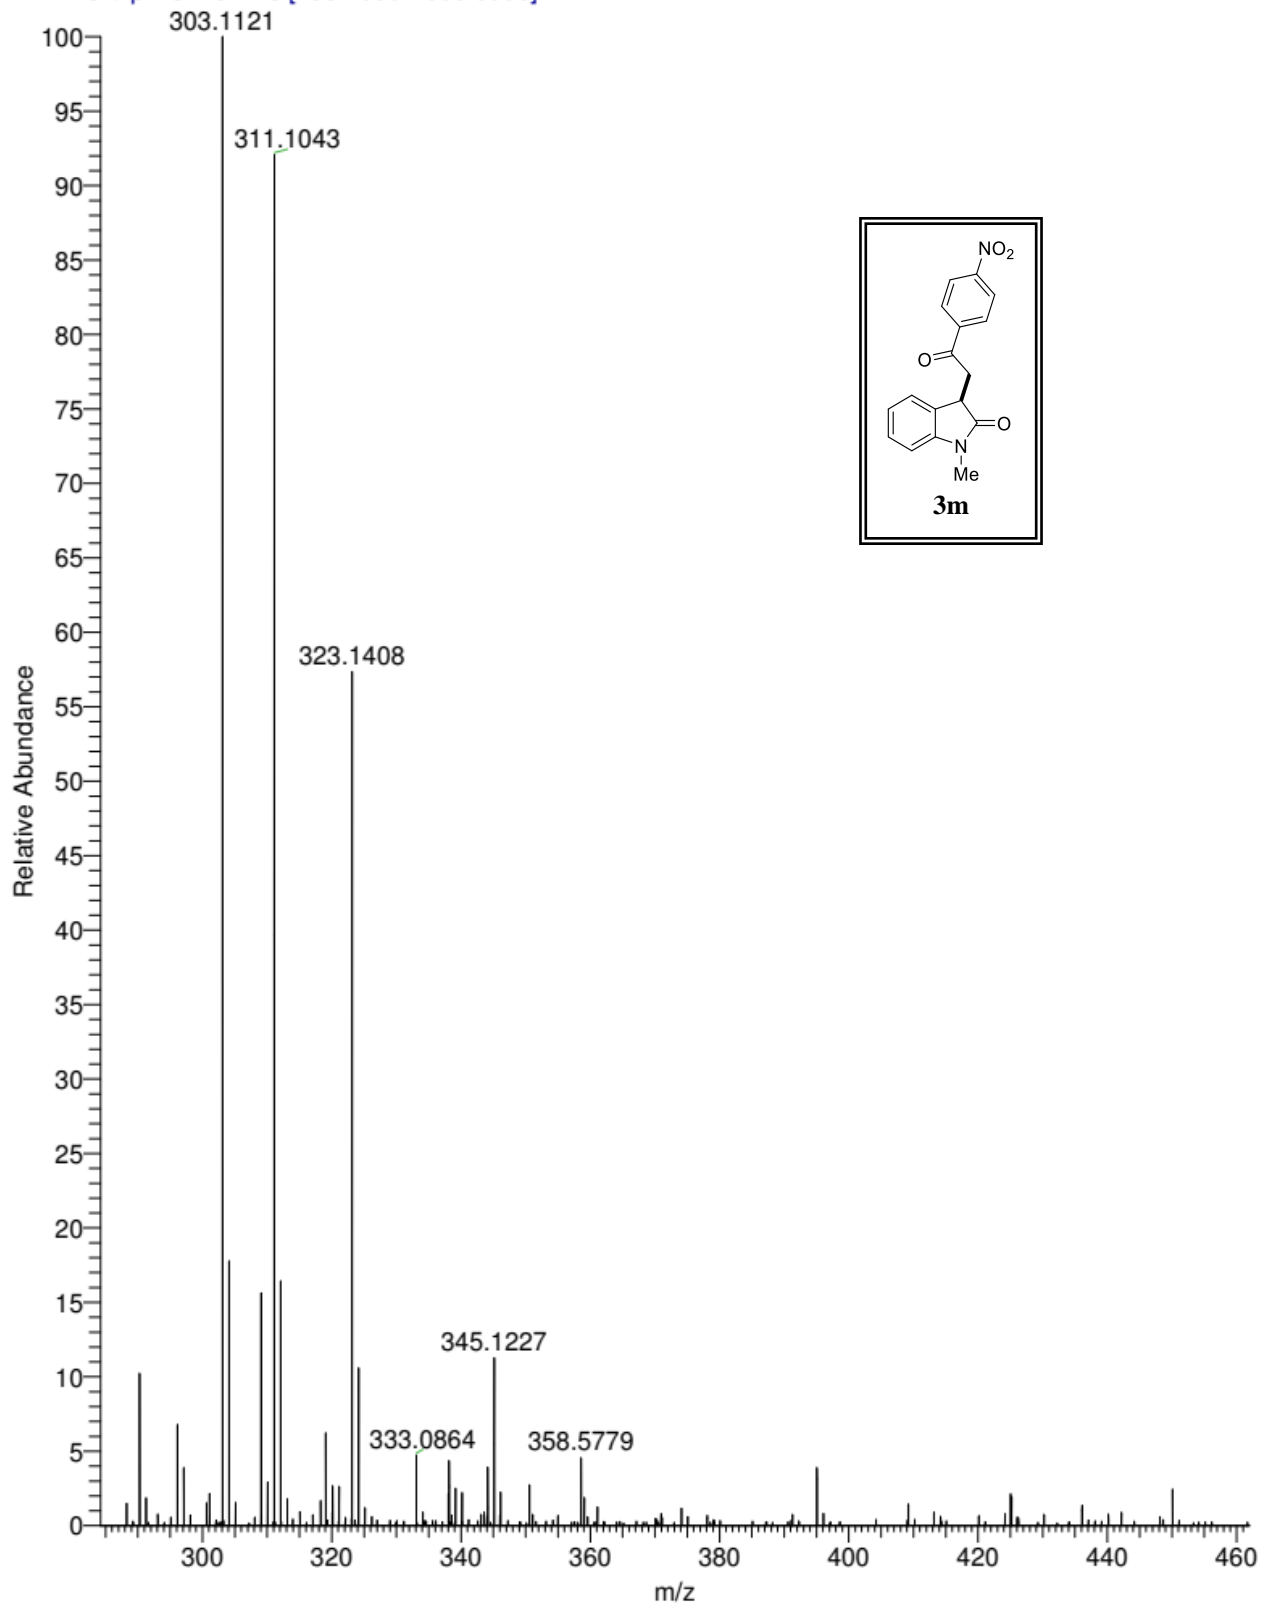

# Compound 3n

APR-343\_20201016172510 #45 RT: 0.45 AV: 1 NL: 2.93E7  
T: FTMS + p ESI Full ms [100.0000-1000.0000]

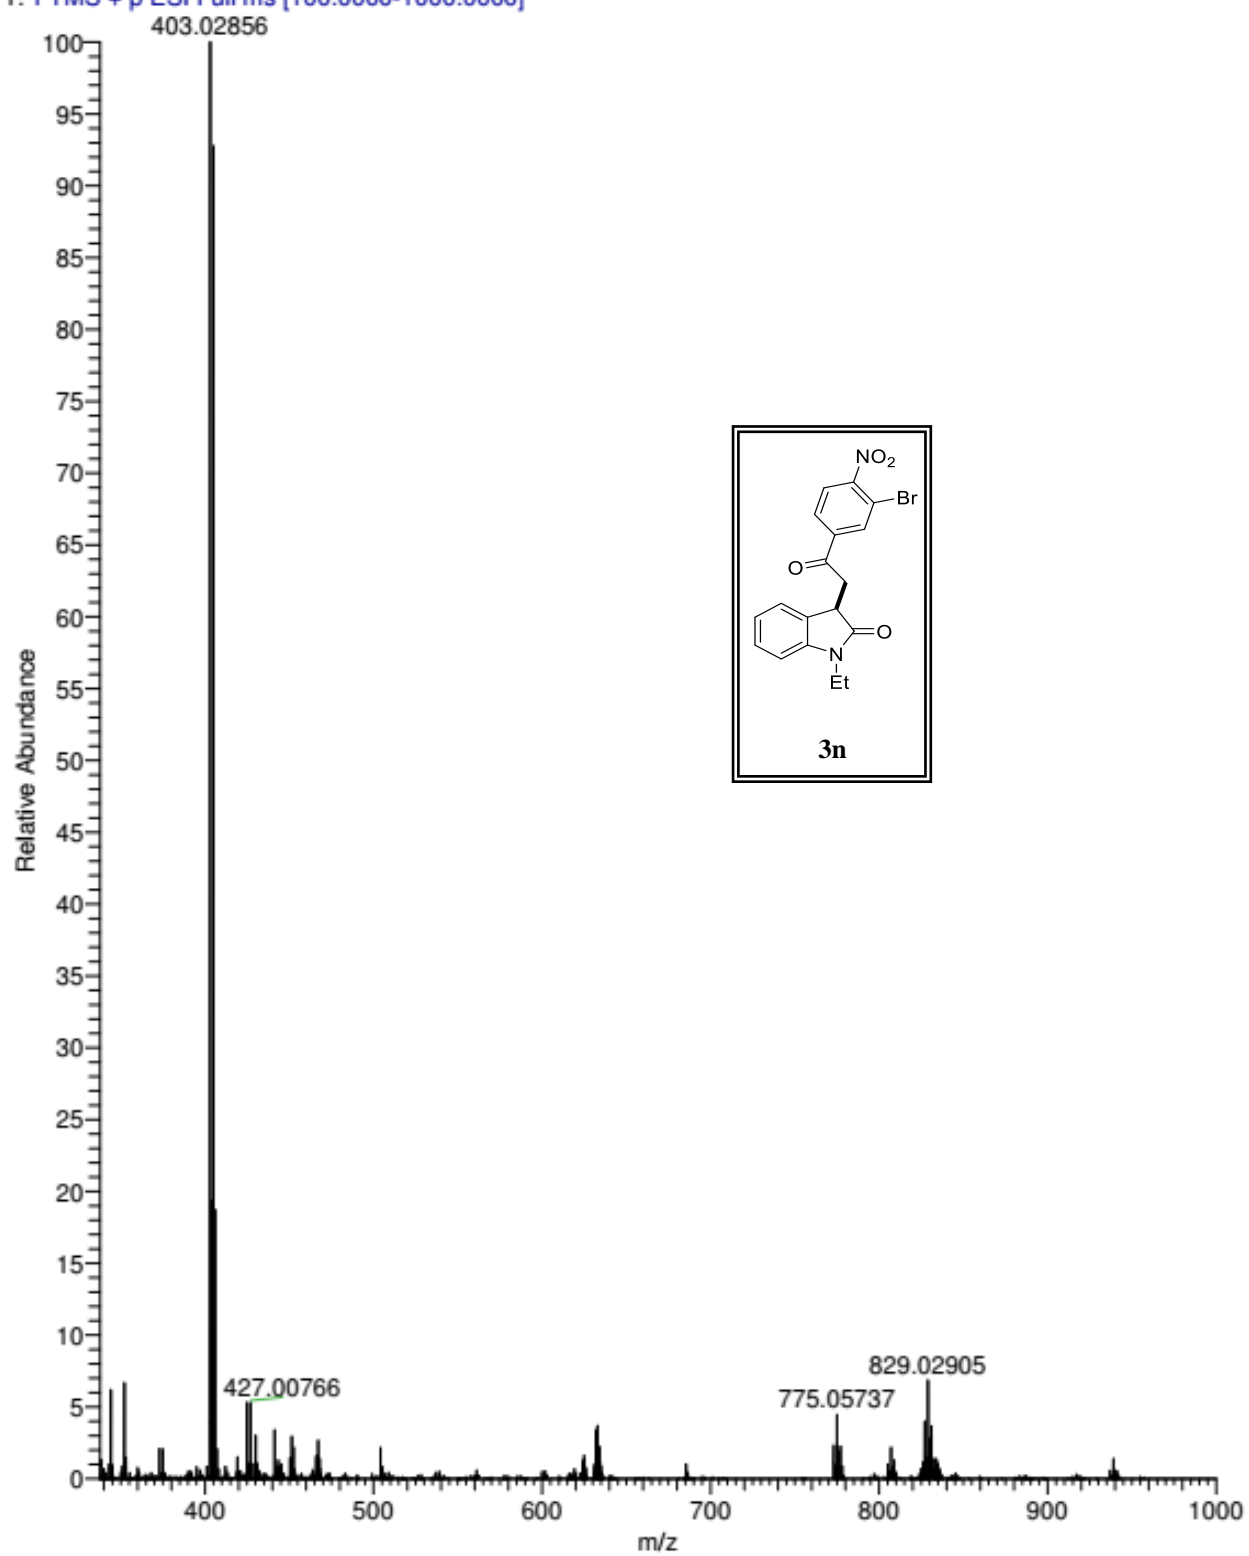

# Compound 3p

APR-566 #29 RT: 0.30 AV: 1 NL: 7.12E7  
T: FTMS + p ESI Full ms [100.0000-1000.0000]

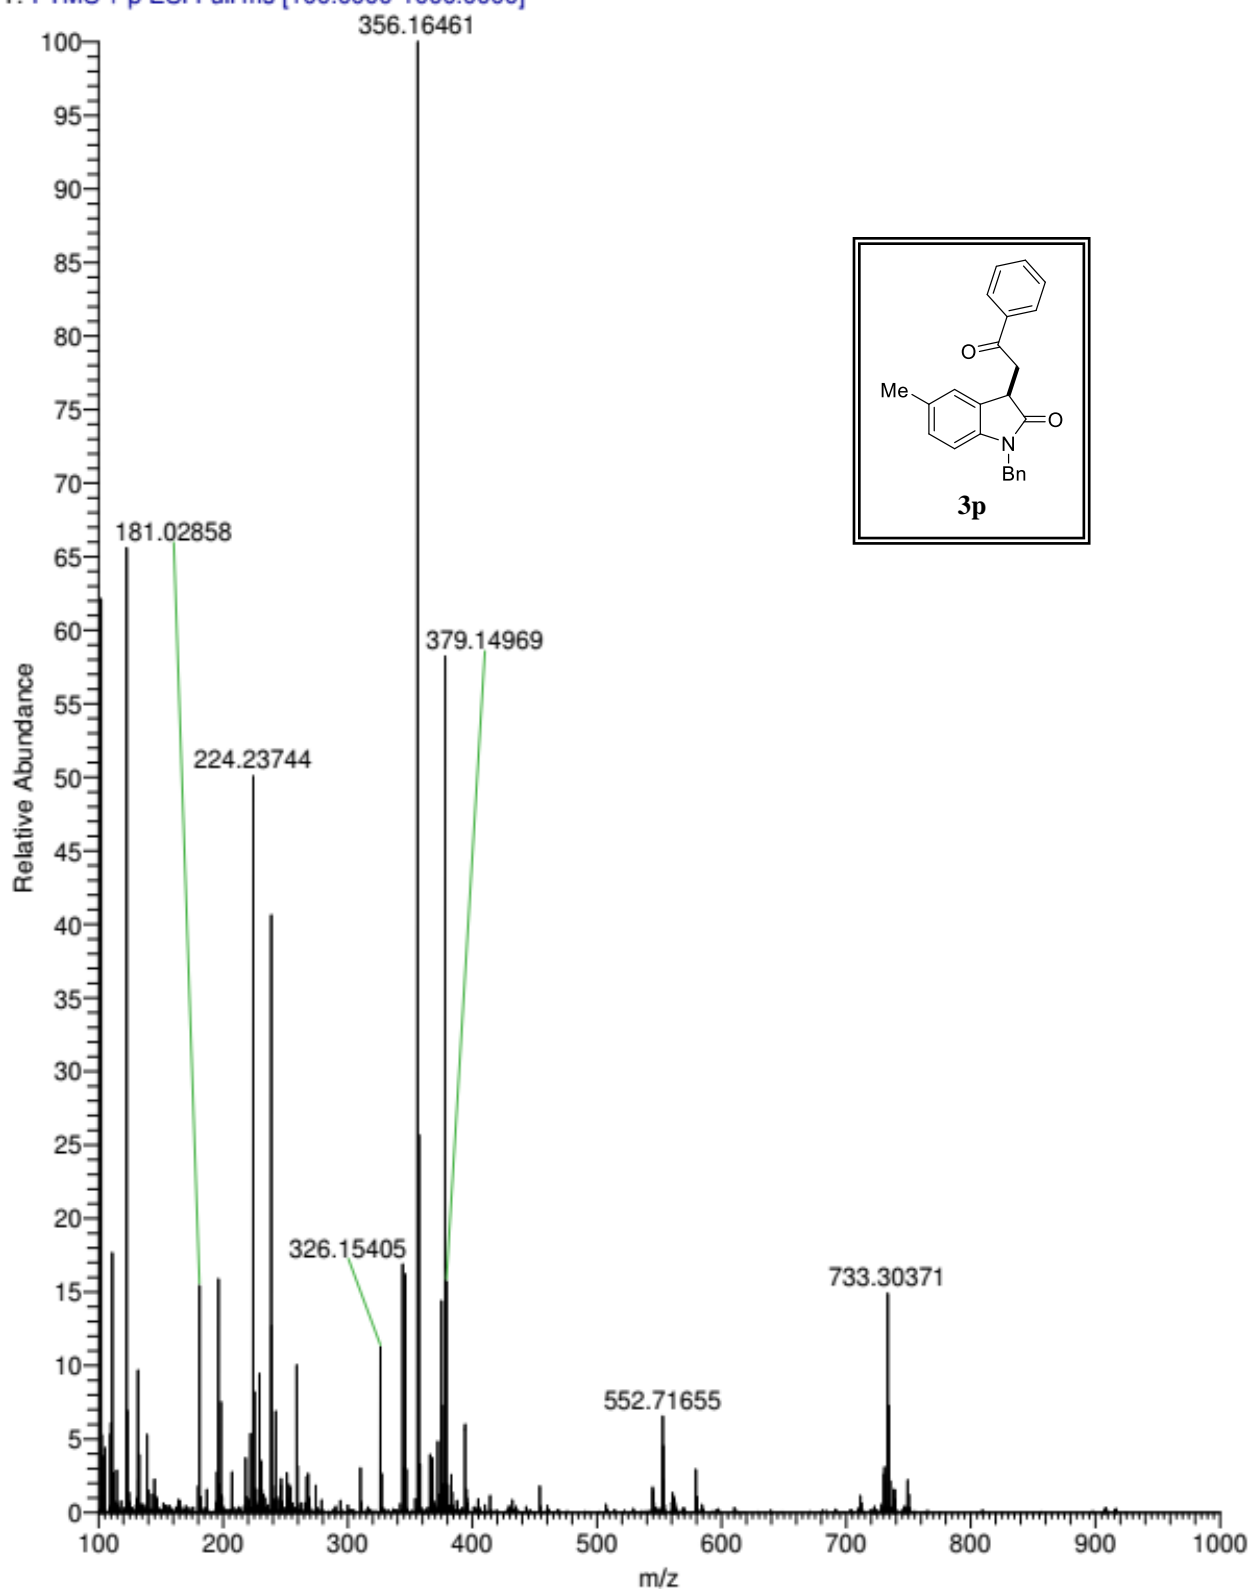

# Compound 3q

APR-378 #348 RT: 2.30 AV: 1 NL: 2.86E4

F: ITMS + p ESI Full ms [100.00-1000.00]

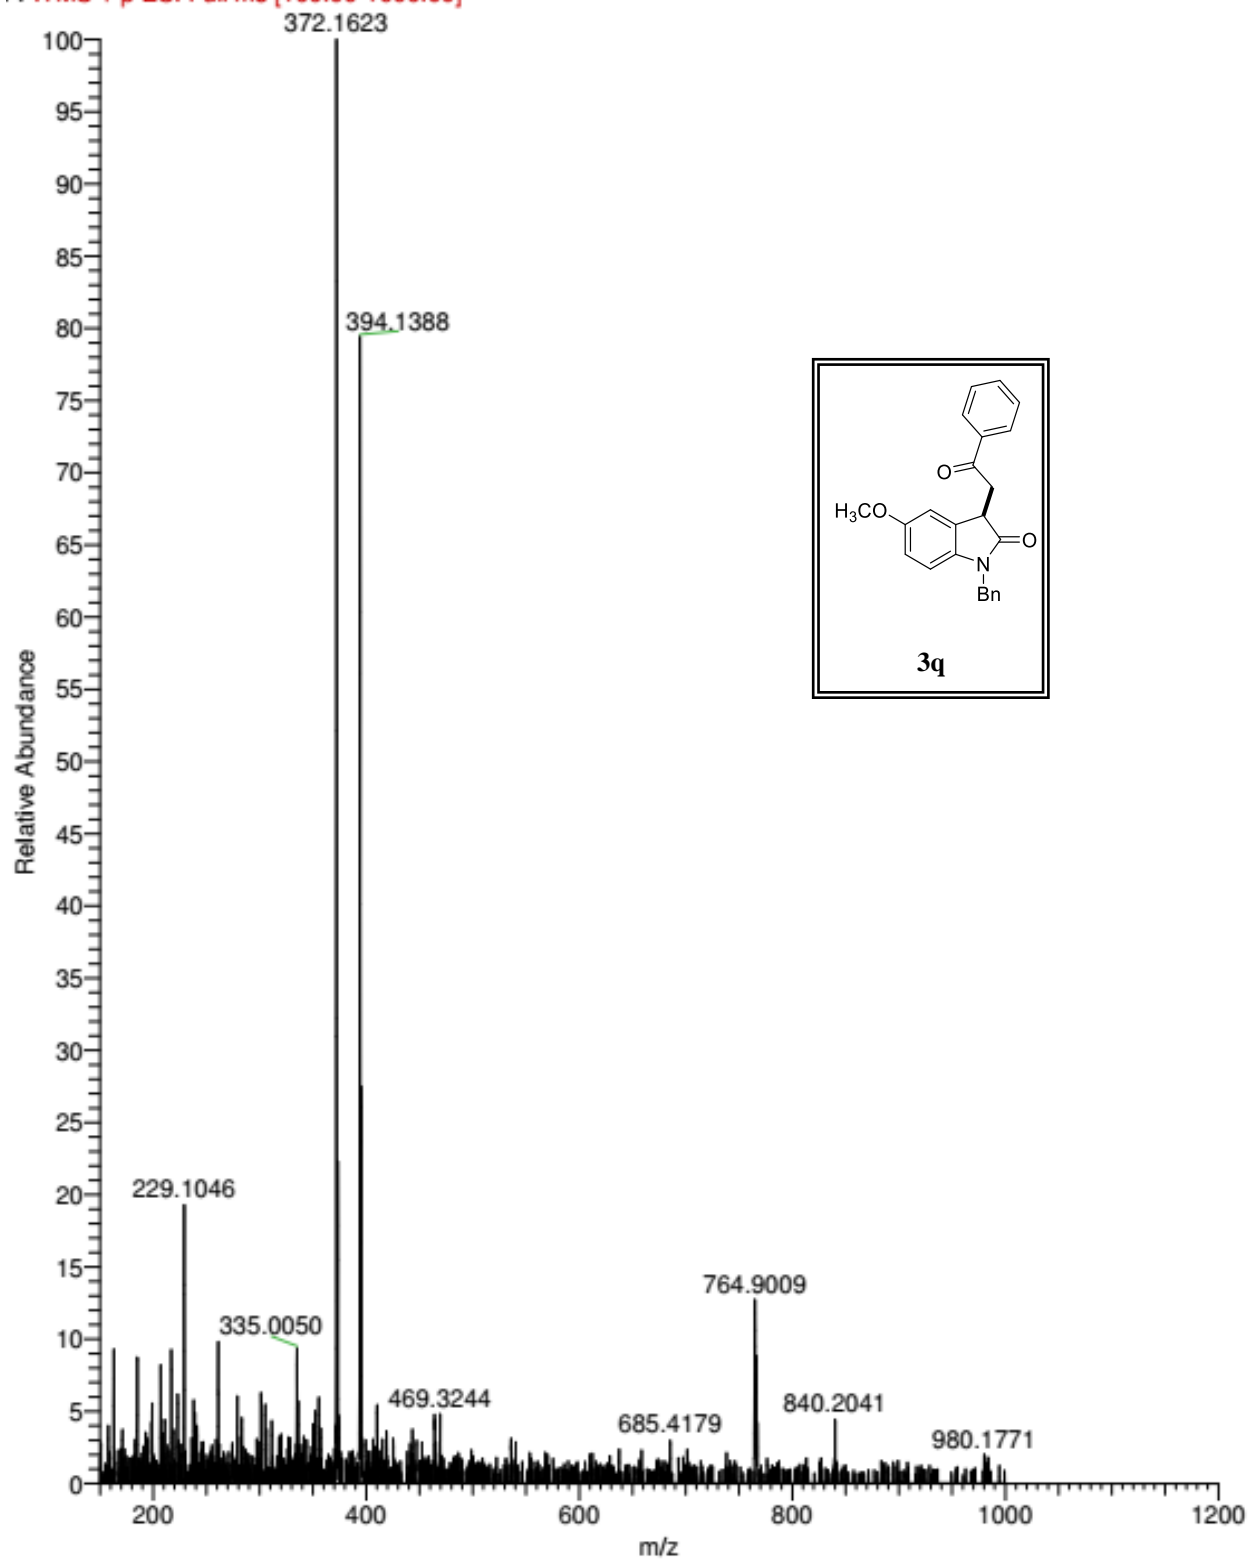

# Compound 3r

APR-403 #37 RT: 0.37 AV: 1 NL: 9.21E7  
T: FTMS + p ESI Full ms [100.0000-1000.0000]

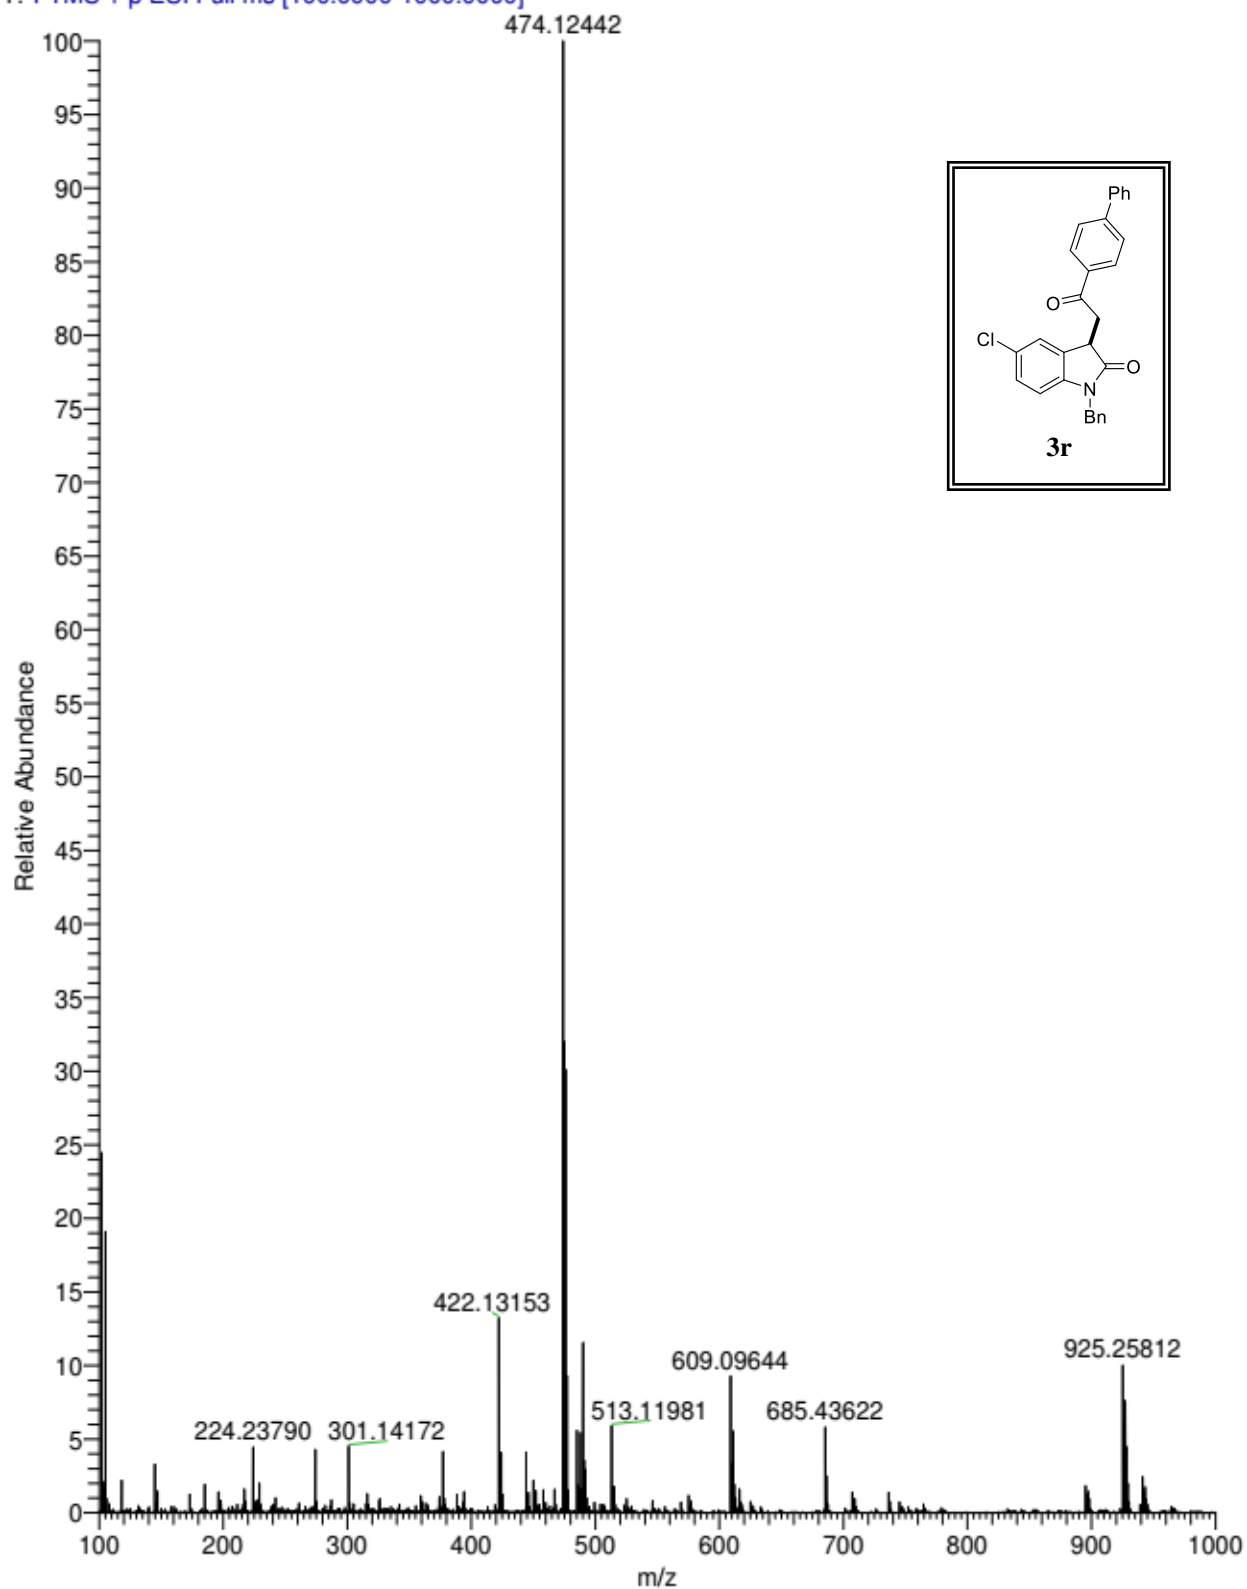



# Compound 3s

APR-552 #39 RT: 0.39 AV: 1 NL: 8.65E7  
T: FTMS + p ESI Full ms [100.0000-1000.0000]

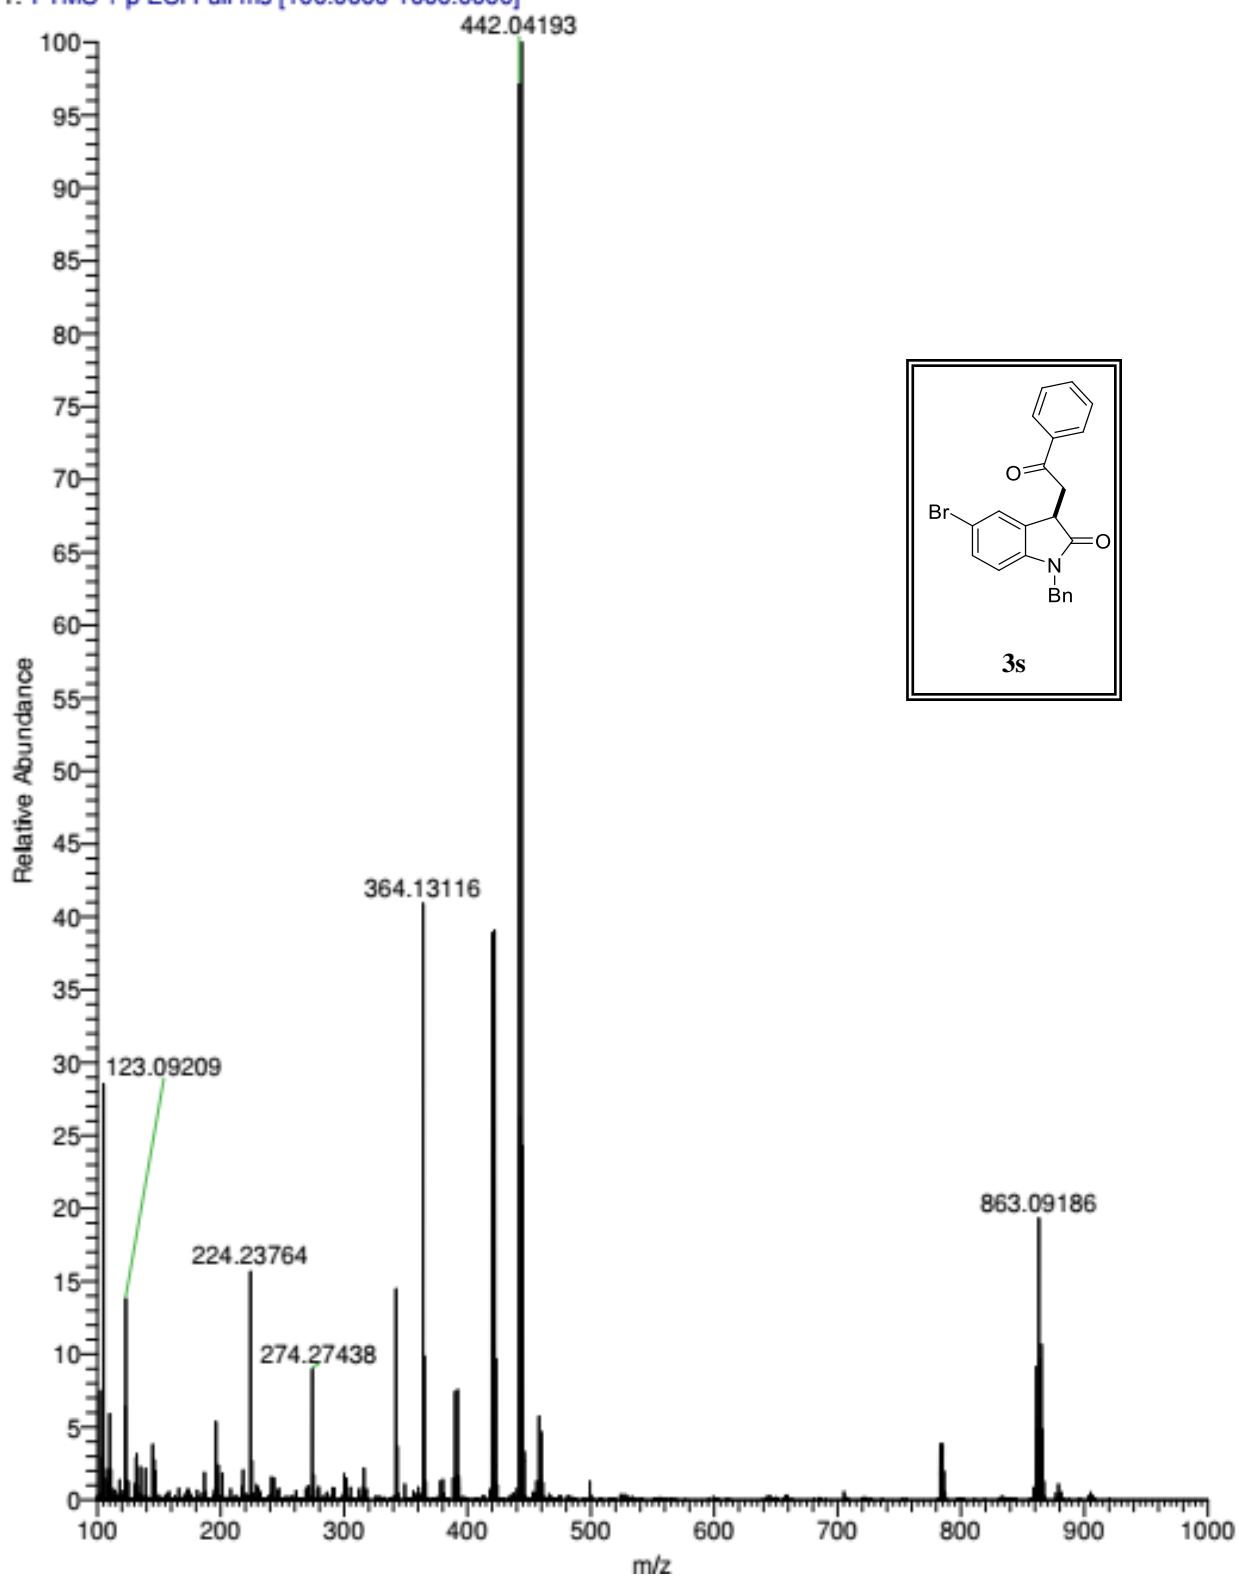

# Compound 3t

APR-240\_20180409171321 #38 RT: 0.39 AV: 1 NL: 4.24E8

T: FTMS + p ESI Full ms [200.0000-1000.0000]

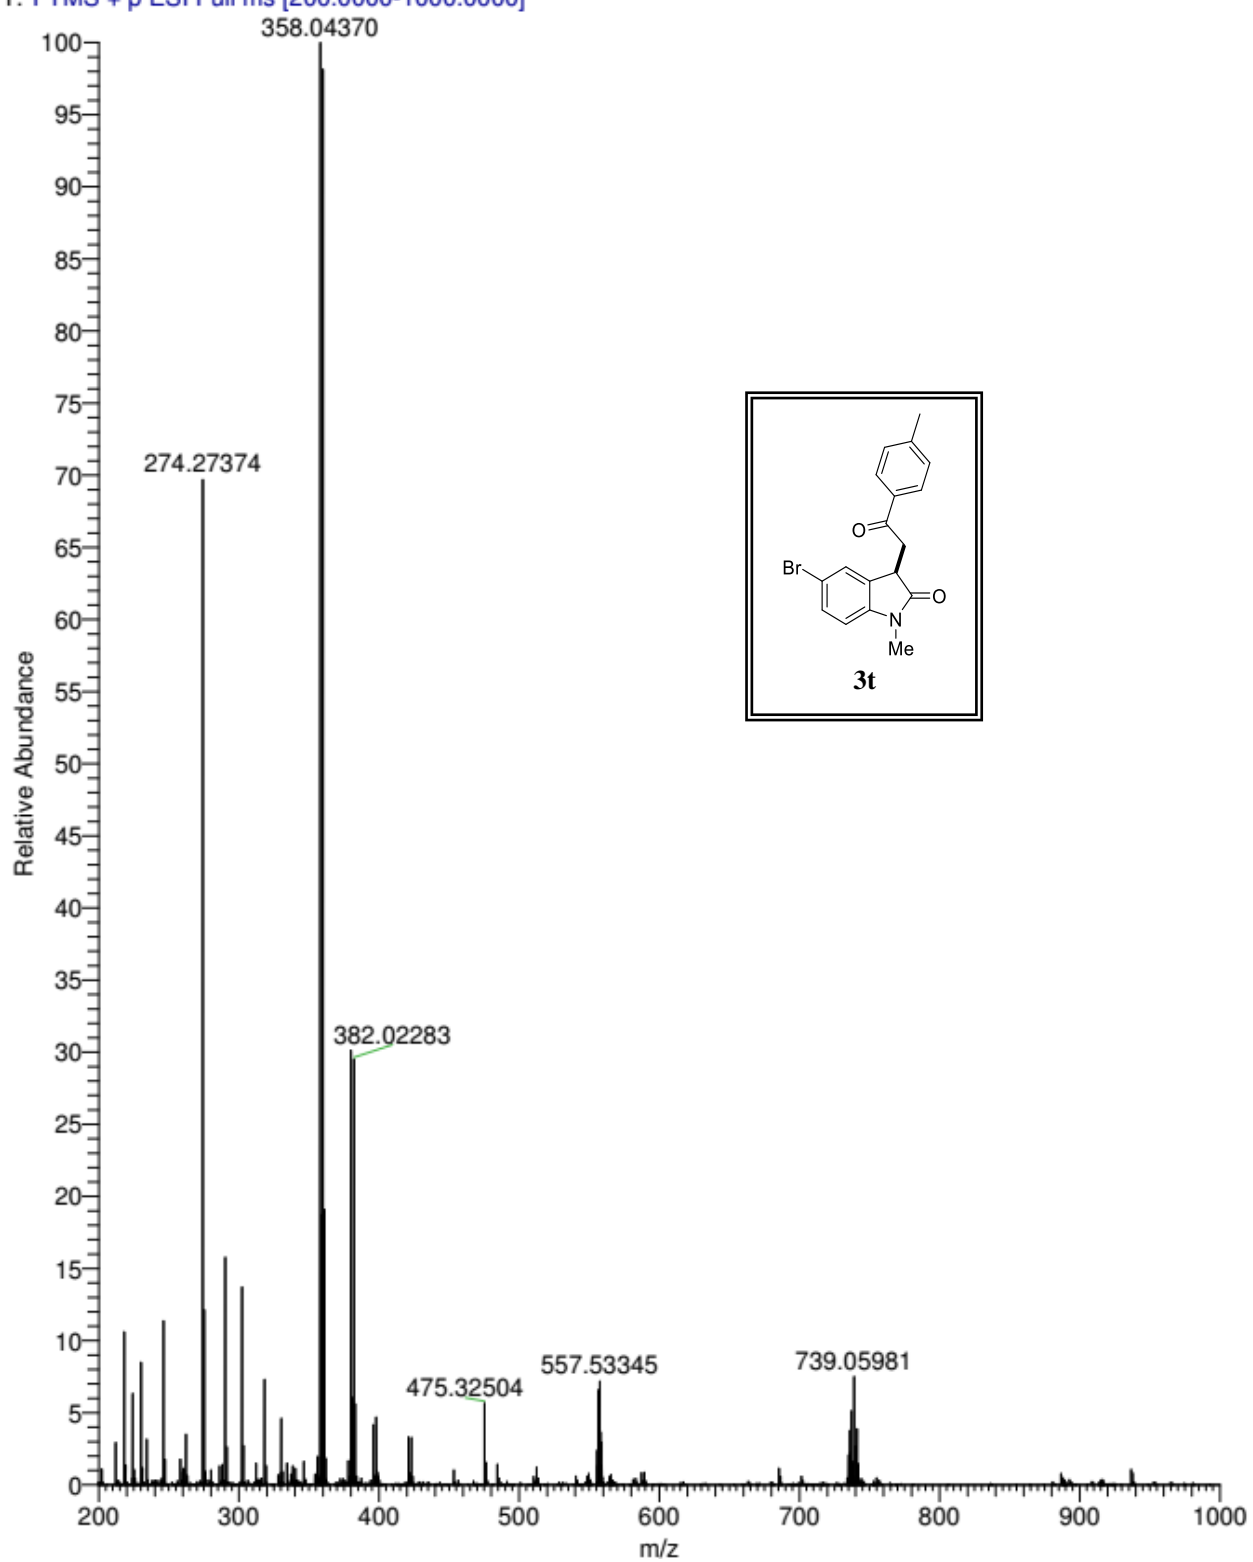

# Compound **3u**

APR-553\_20201017123640 #53 RT: 0.53 AV: 1 NL: 4.09E6

T: FTMS + p ESI Full ms [100.0000-1000.0000]

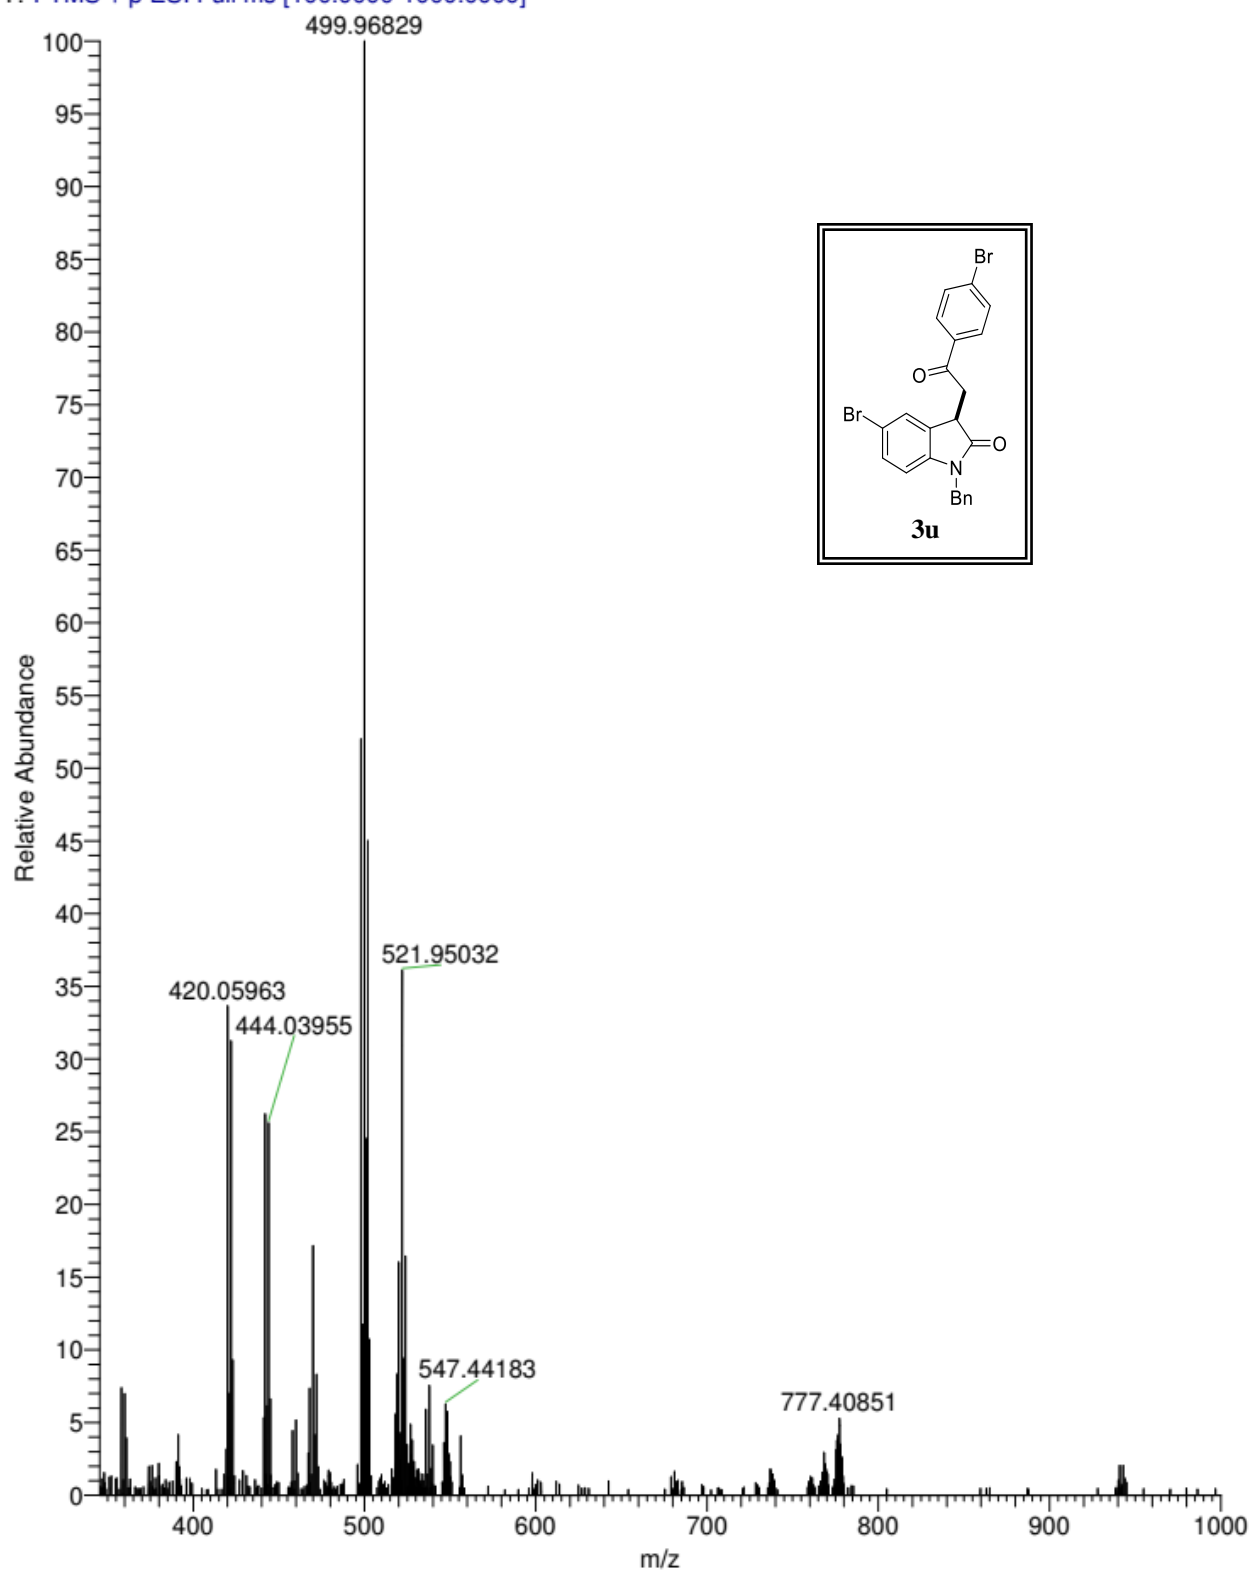

# Compound 3v

APR-559 #49 RT: 0.50 AV: 1 NL: 2.13E7  
T: FTMS + p ESI Full ms [100.0000-1000.0000]

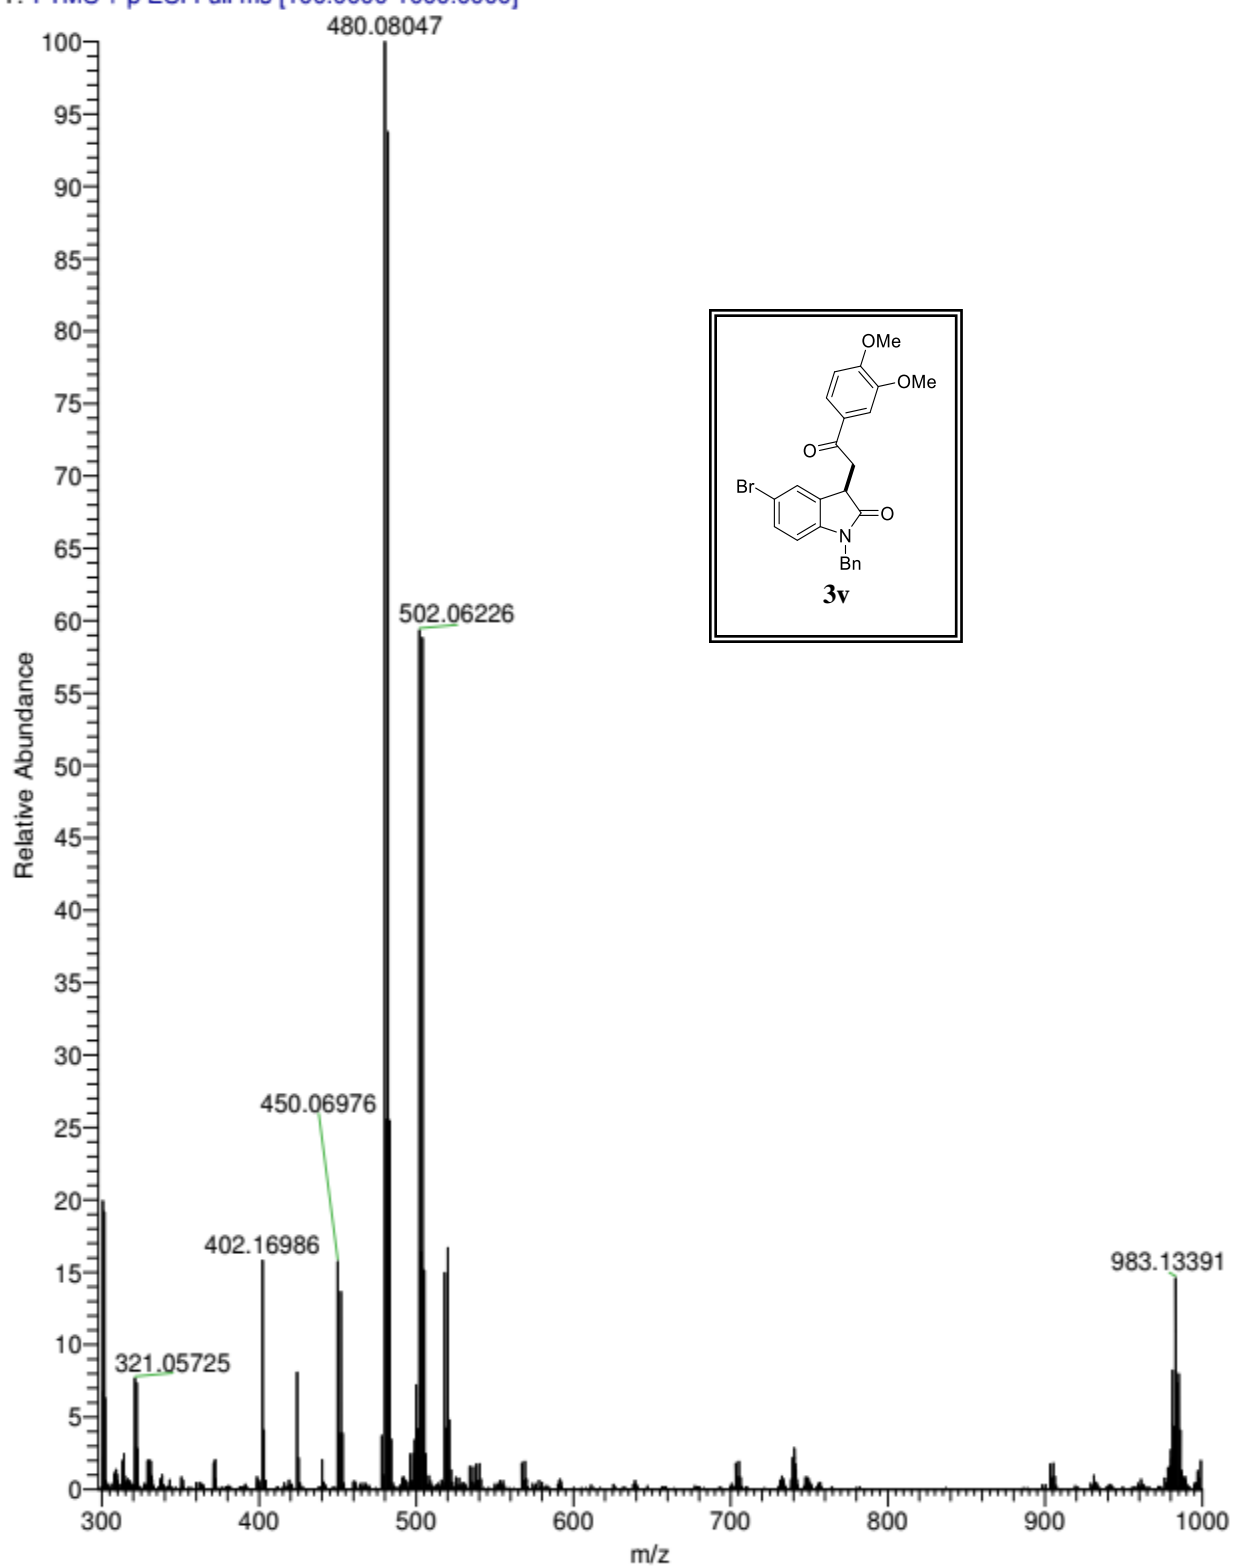

# Compound 3w

APR-368\_20201017115101 #49 RT: 0.49 AV: 1 NL: 2.31E7

T: FTMS + p ESI Full ms [100.0000-1000.0000]

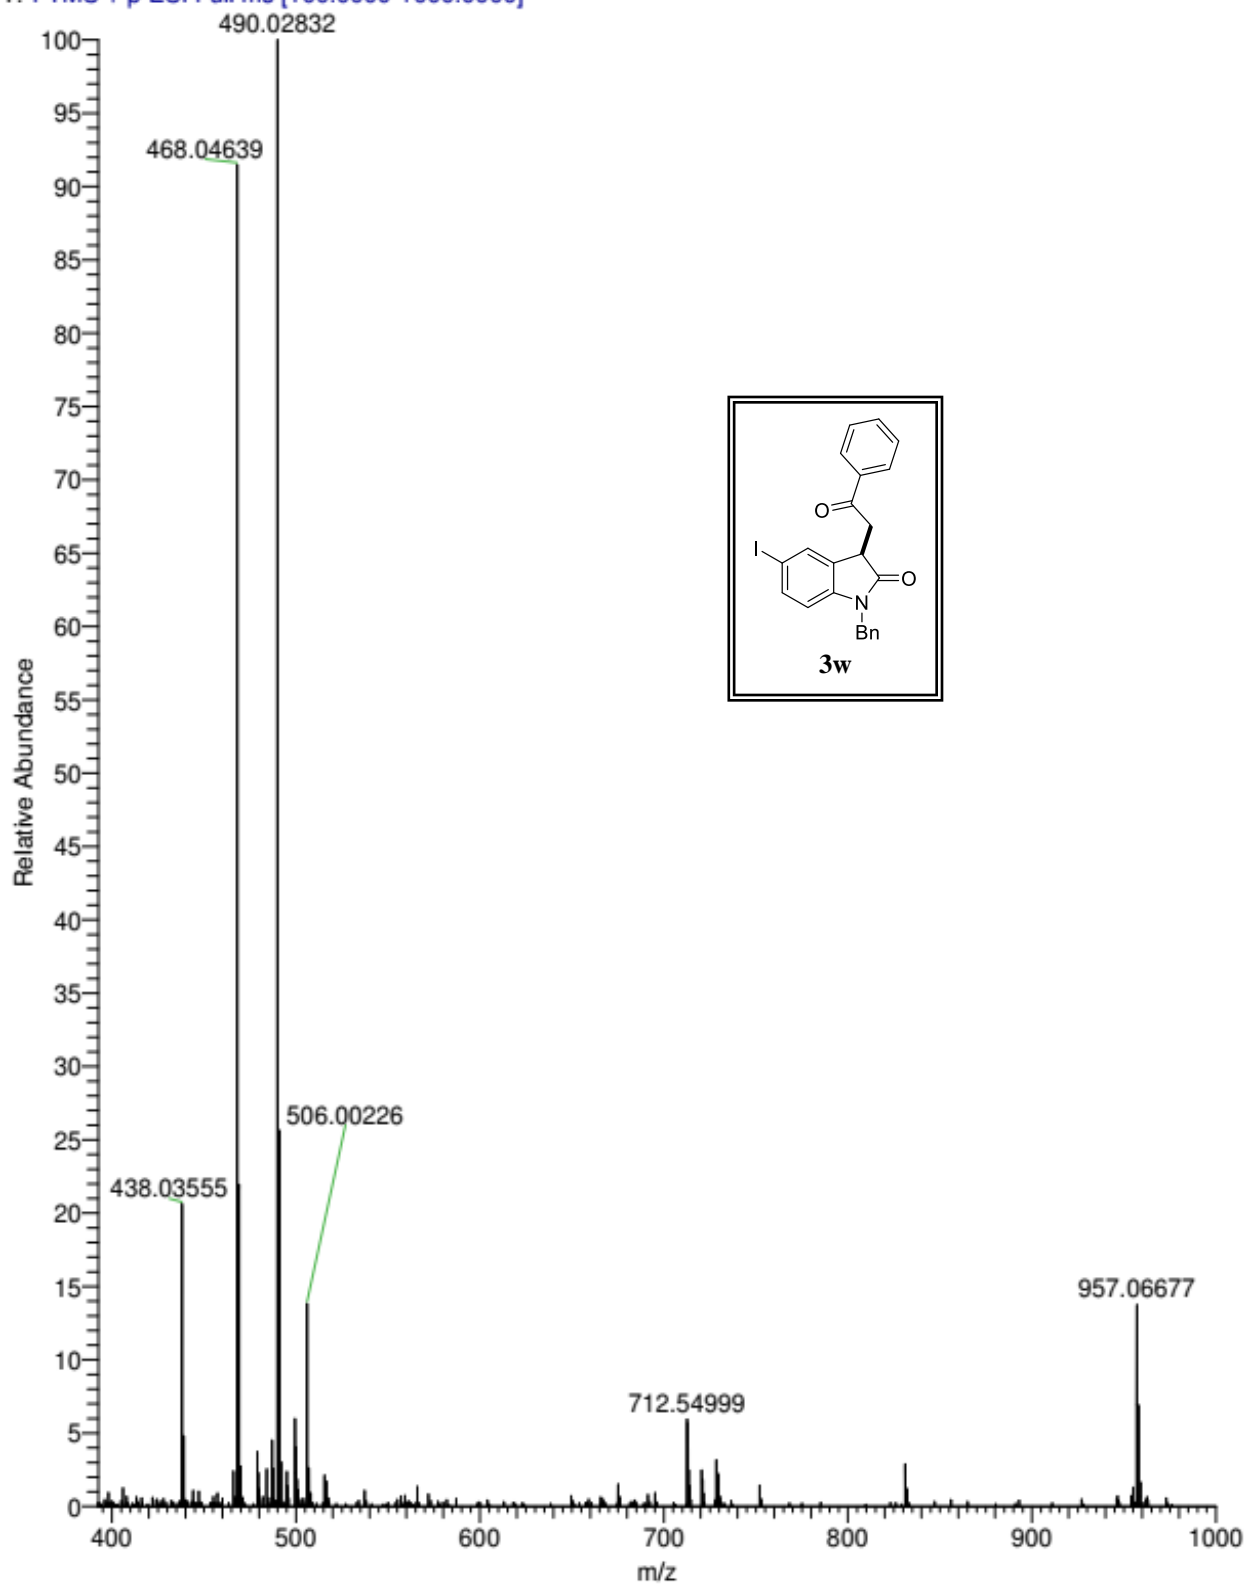

# Compound 3x

APR-564 #344-354 RT: 0.80-0.82 AV: 11 NL: 2.58E7

T: FTMS + p ESI Full ms [300.0000-450.0000]

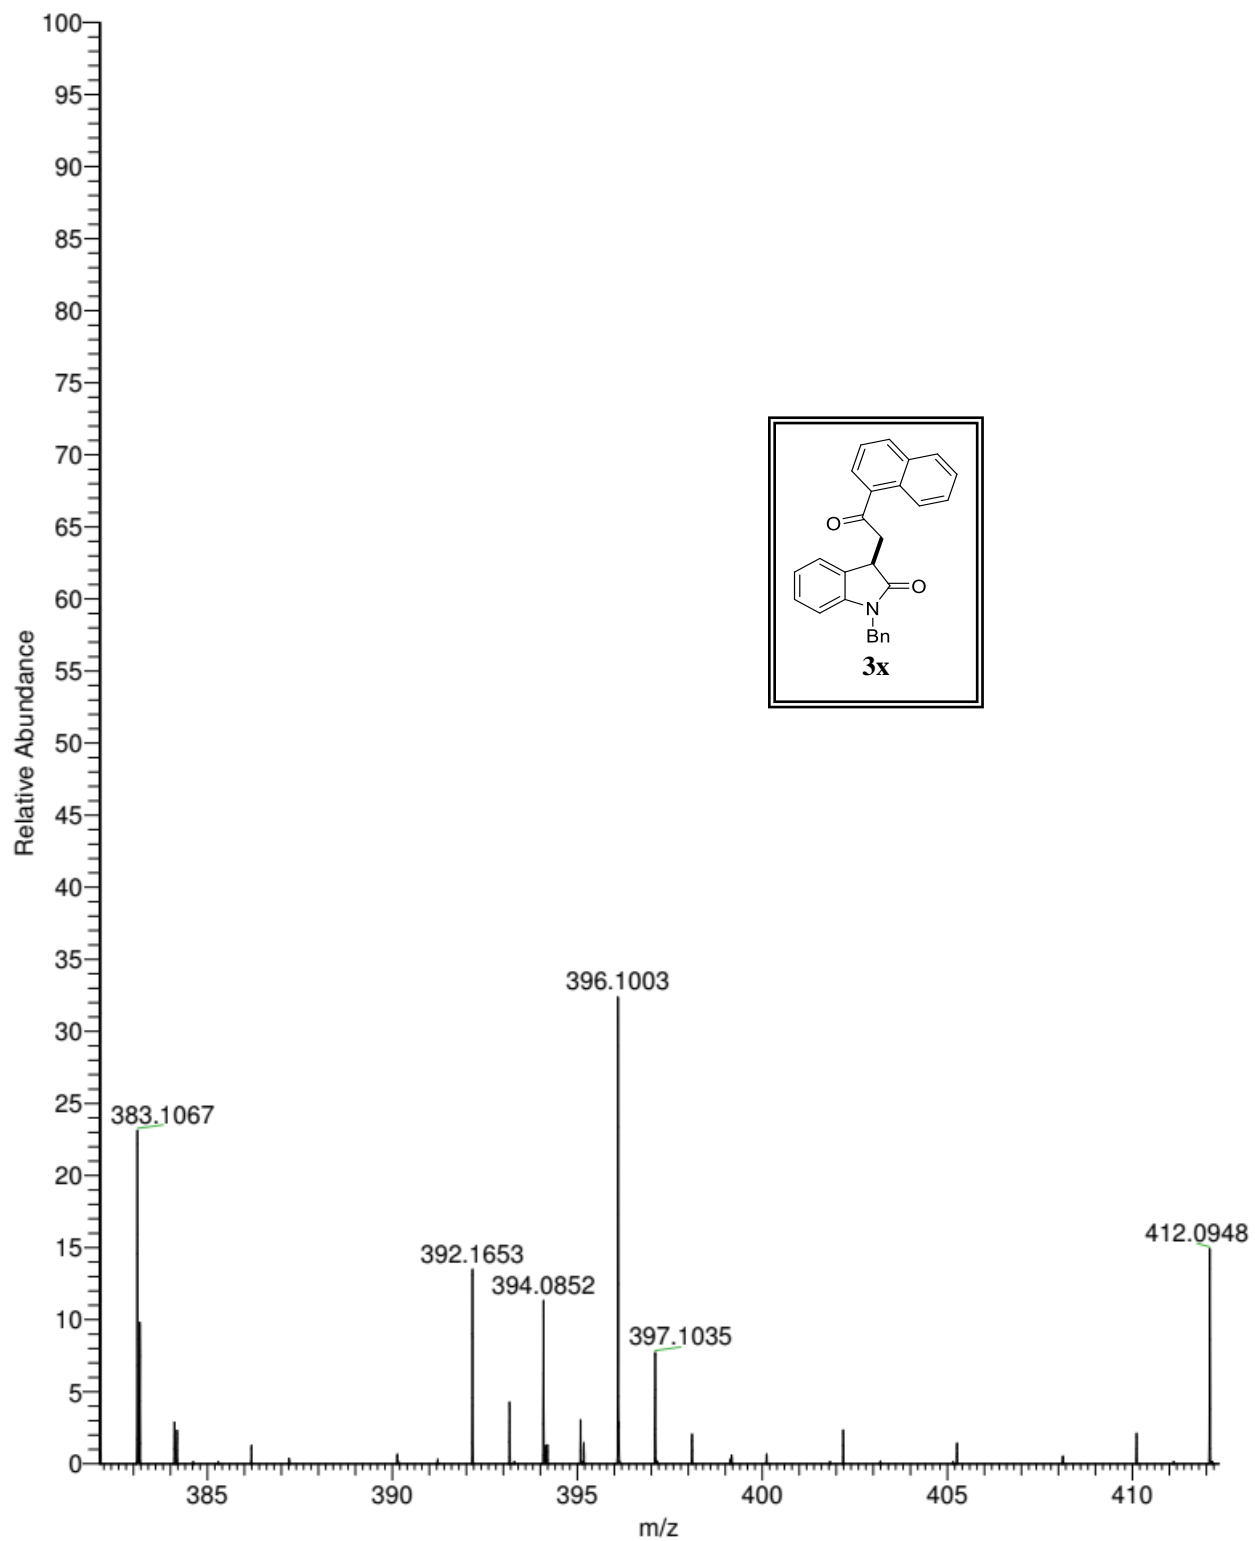

# Compound 3y

APR-337\_20201016172201 #41 RT: 0.41 AV: 1 NL: 6.79E8  
T: FTMS + p ESI Full ms [100.0000-1000.0000]

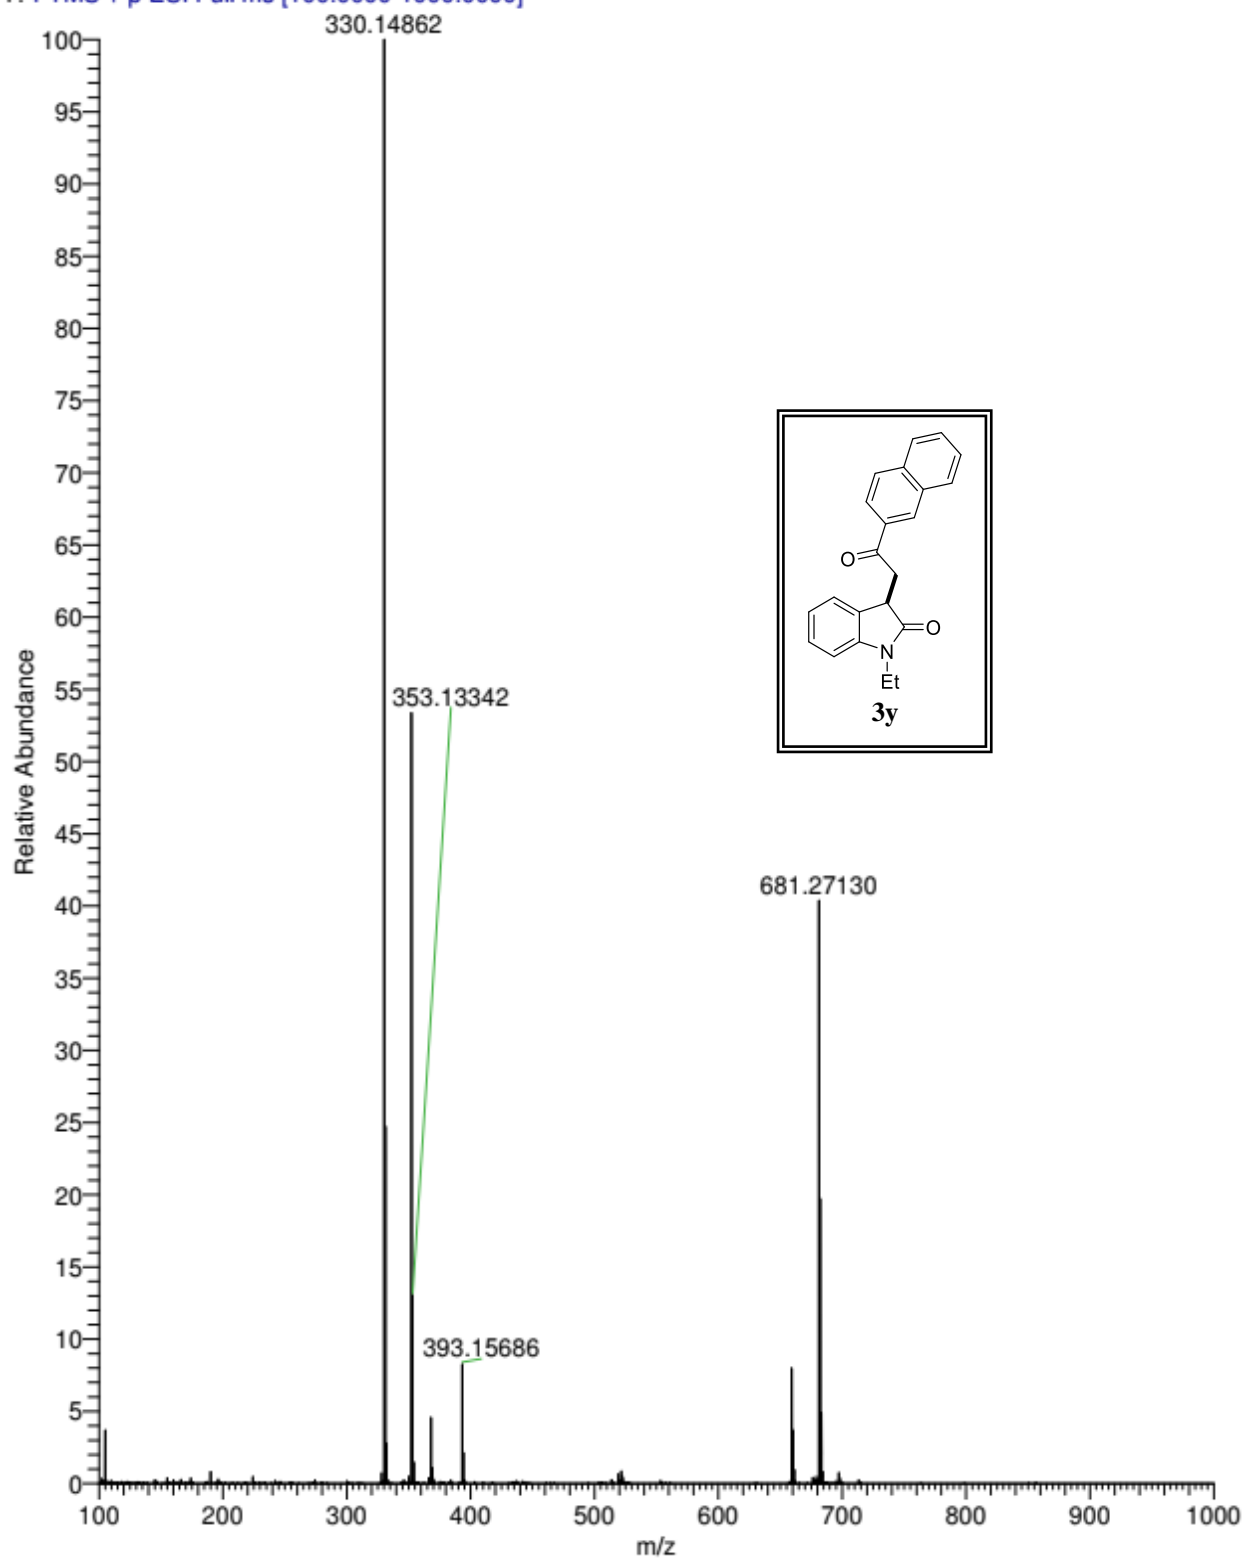

# Compound 3z

APR-339 #160 RT: 1.14 AV: 1 NL: 1.10E5

F: ITMS + p ESI Full ms [100.00-1000.00]

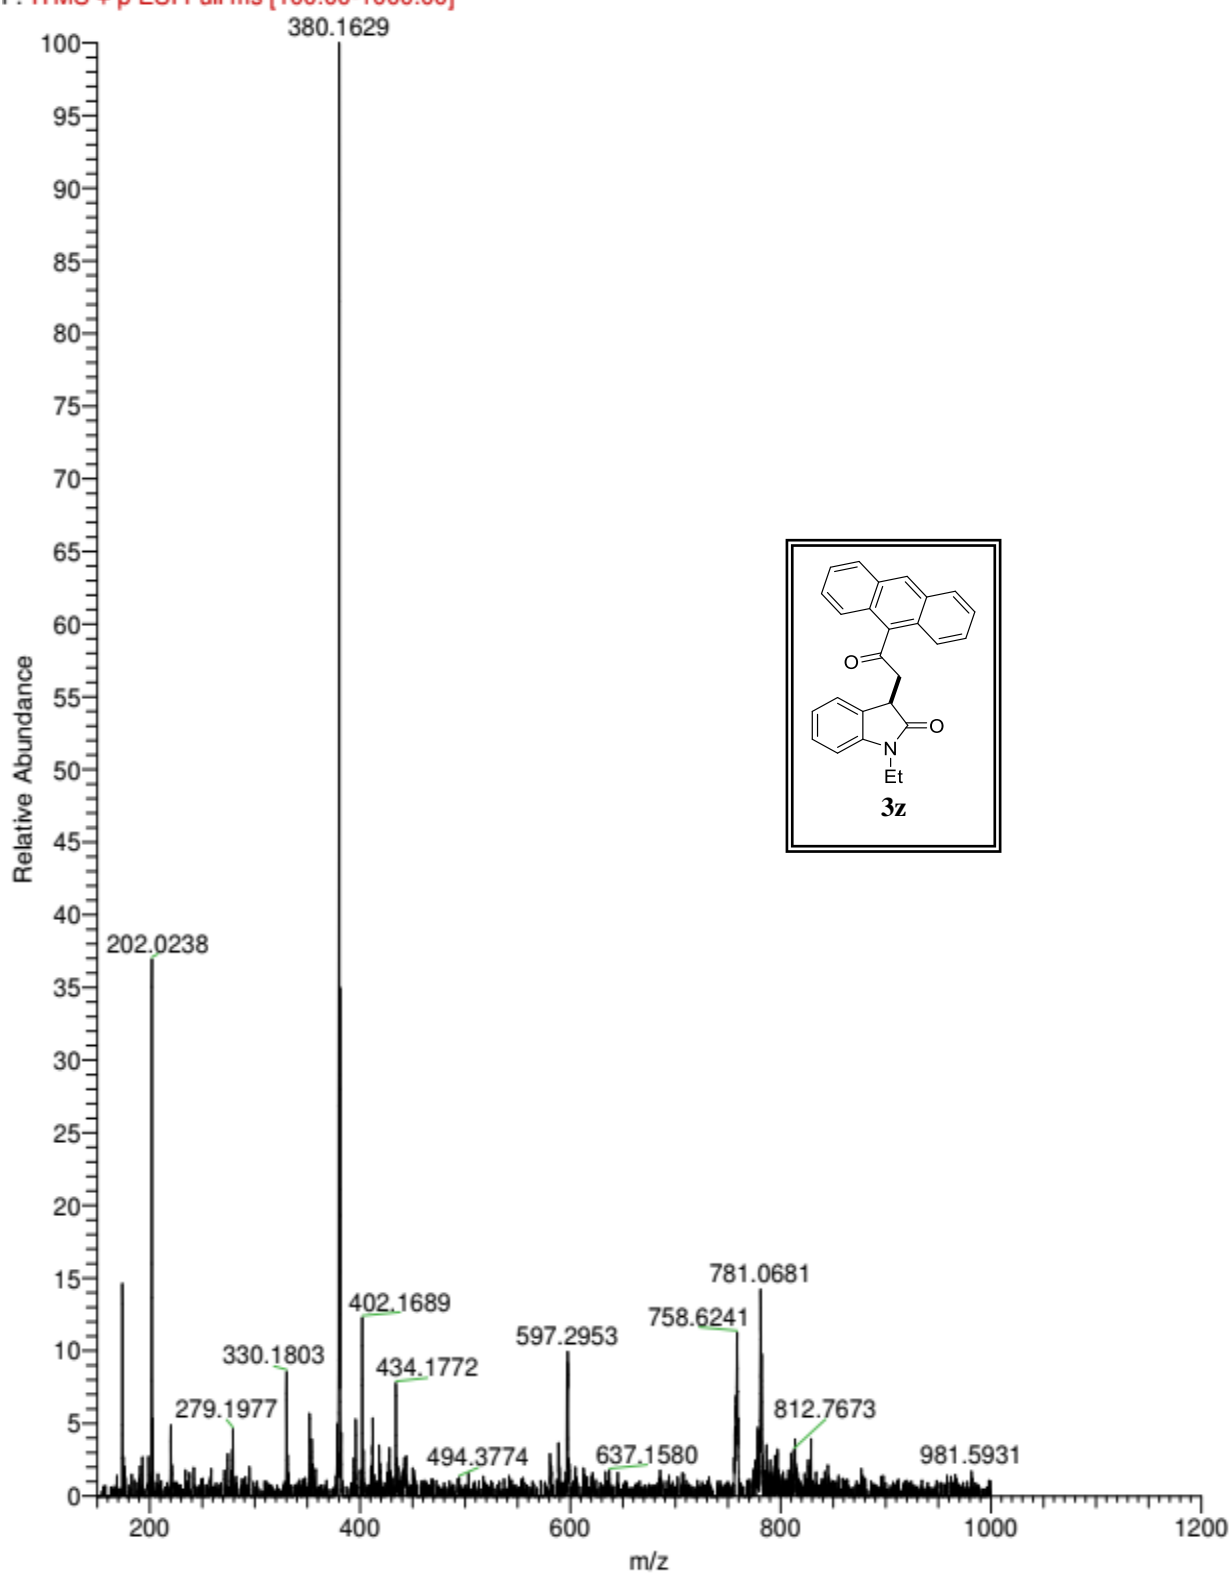



# Compound 3aa

APR-747-A #40 RT: 0.38 AV: 1 NL: 6.94E8  
T: FTMS + p ESI Full ms [133.4000-2000.0000]

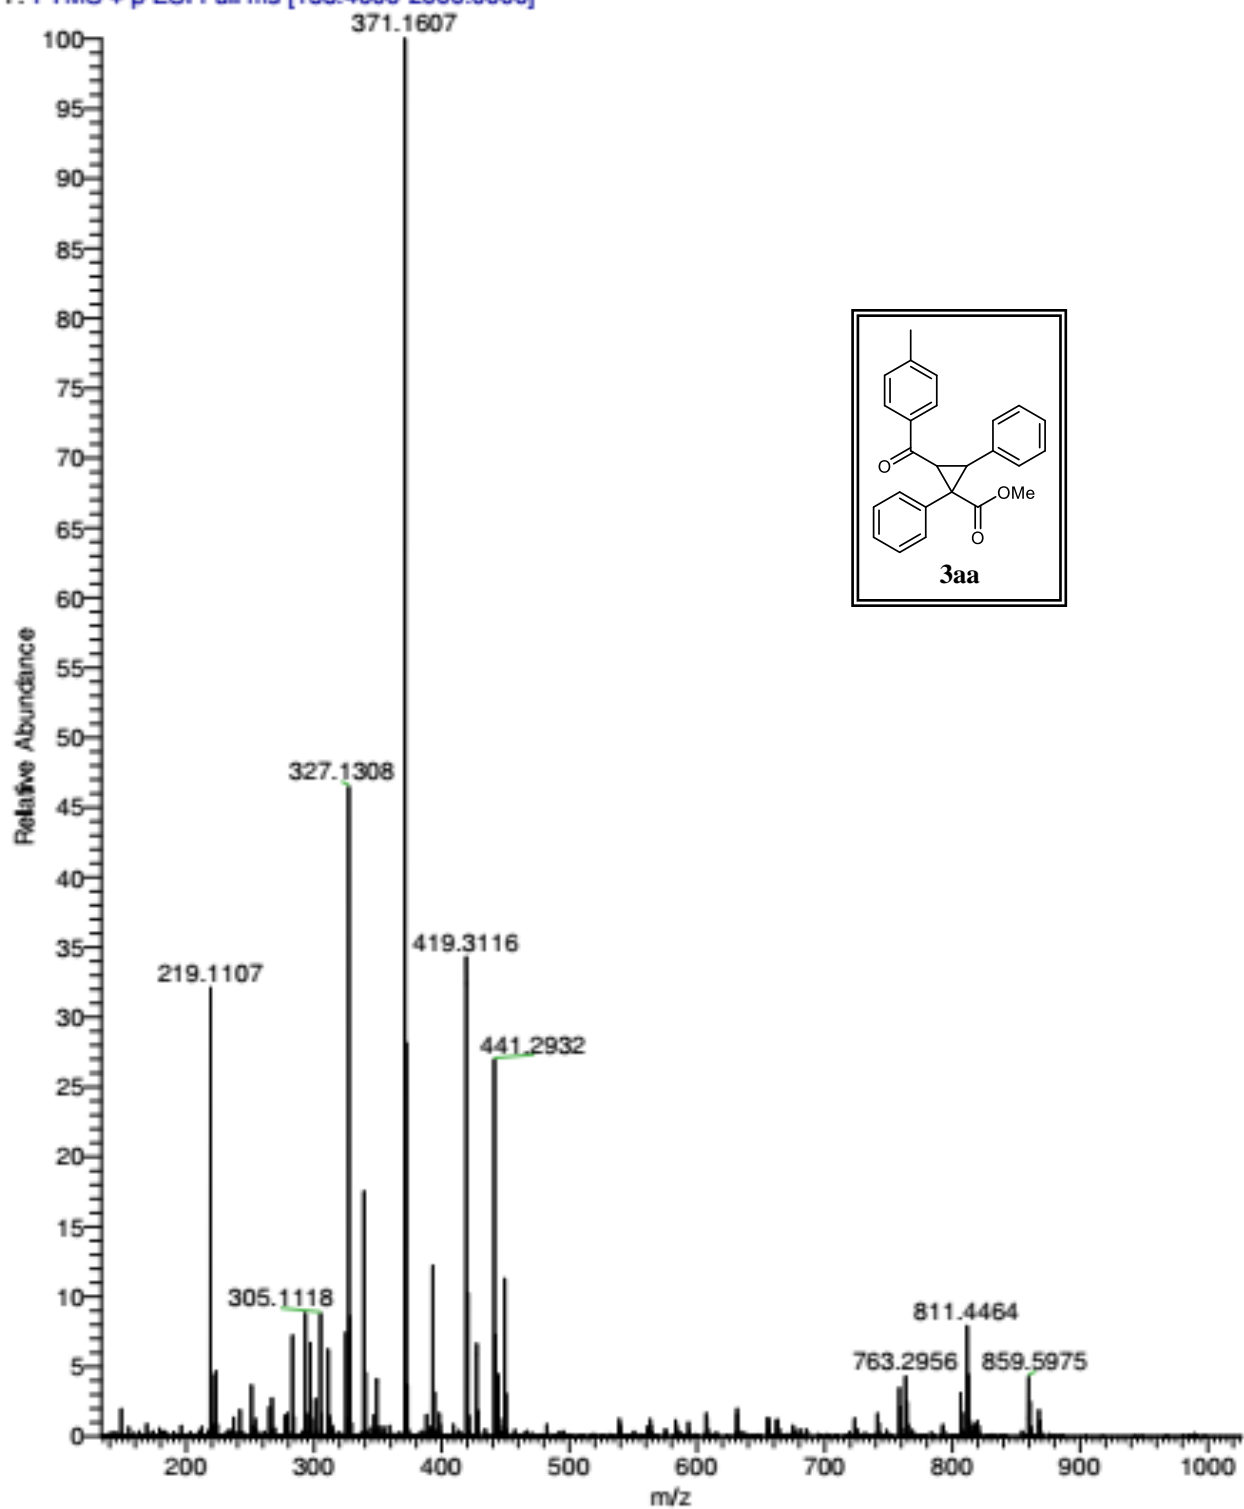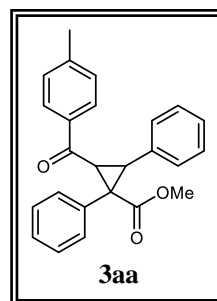

# Compound **6a**

APR-489\_20210226162604 #1059-1069 RT: 2.46-2.49 AV: 11 NL: 2.86E7  
T: FTMS + p ESI Full ms[150.0000-2000.0000]

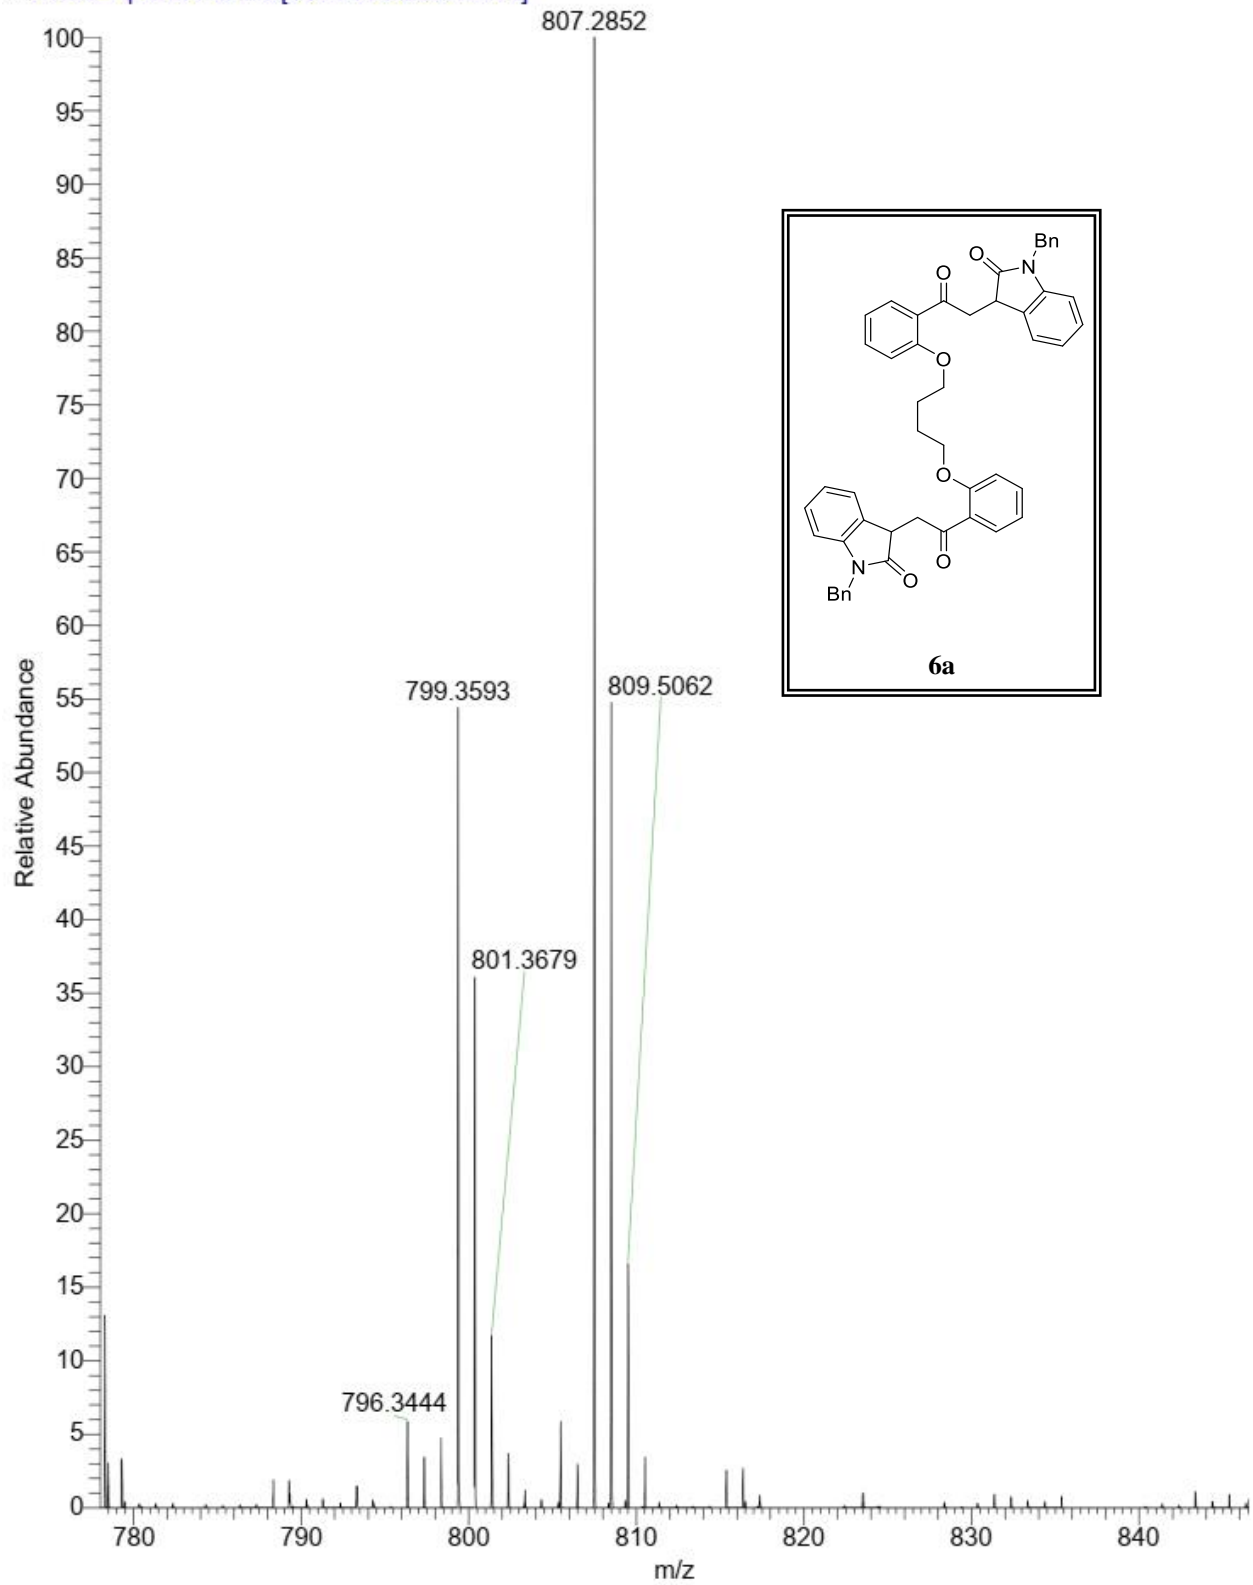

# Compound **6b**

APR-349\_181102141251 #198 RT: 1.34 AV: 1 NL: 1.45E5

F: ITMS + p ESI Full ms [100.00-1000.00]

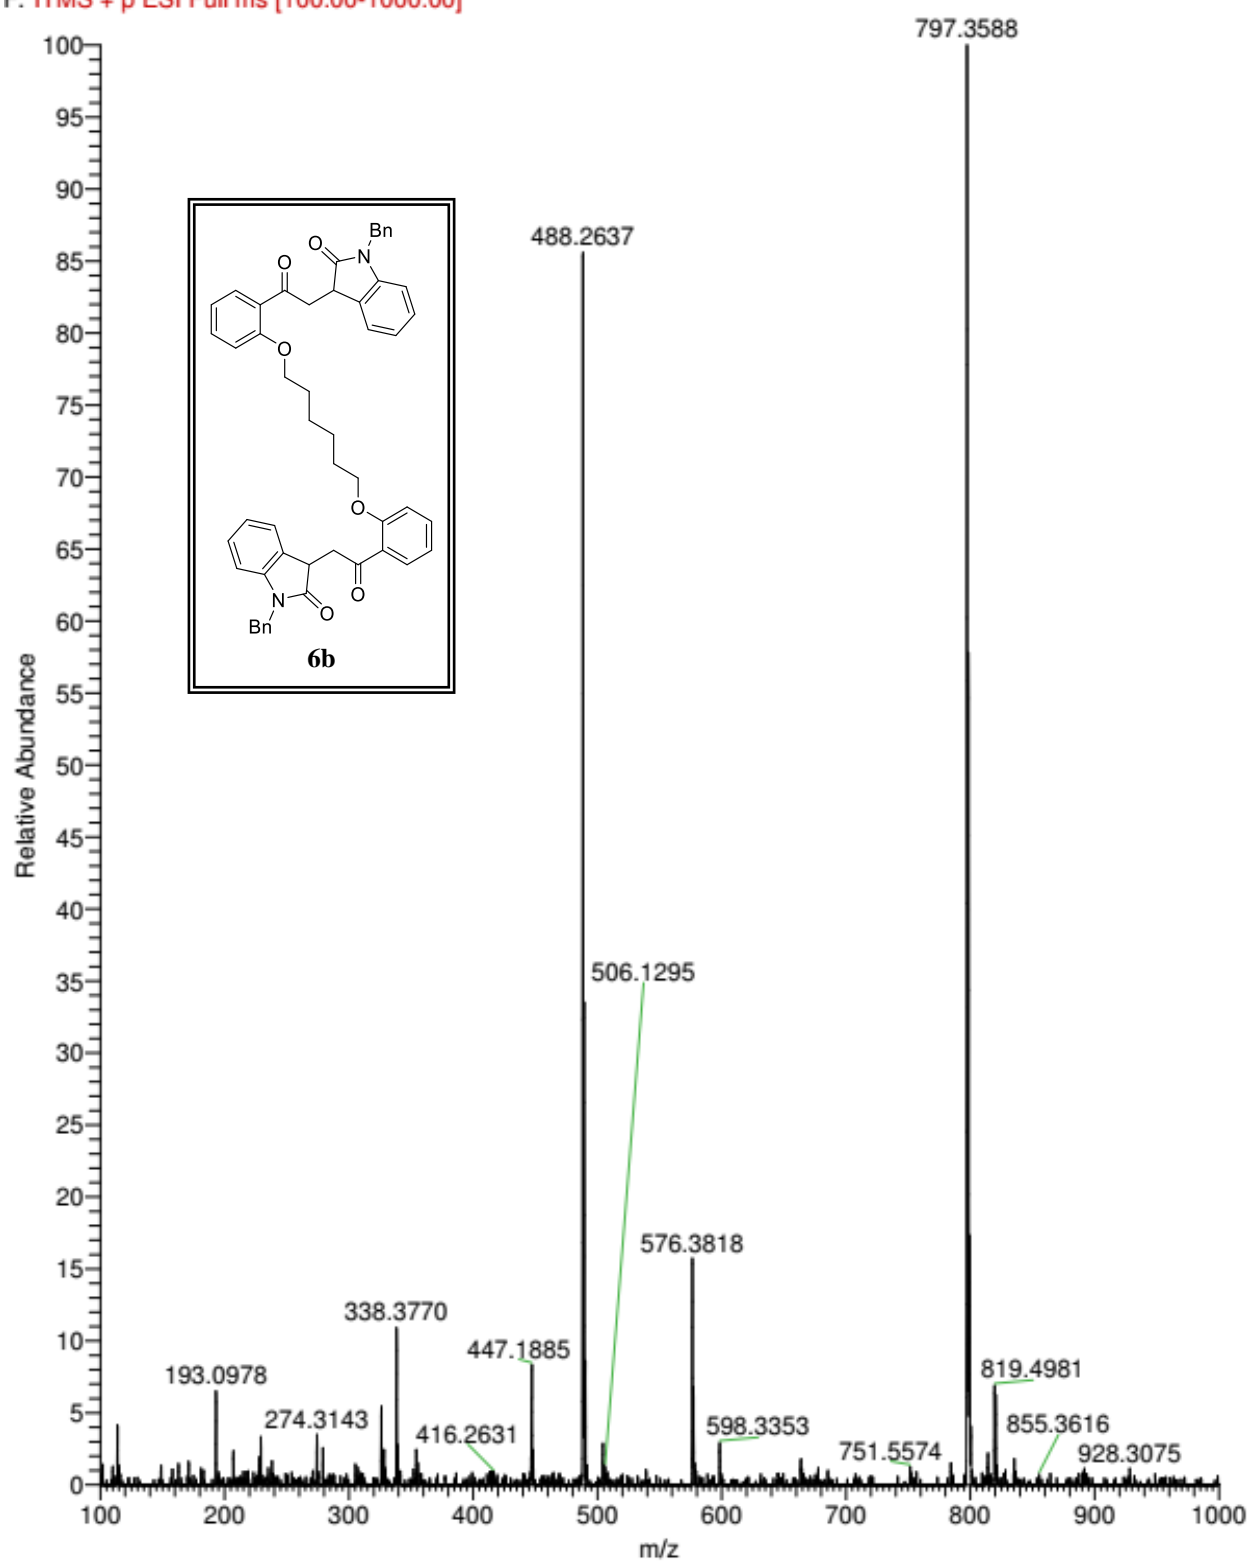

# Compound 7a

APR-488 #45 RT: 0.46 AV: 1 NL: 1.94E7  
T: FTMS + p ESI Full ms [100.0000-1000.0000]

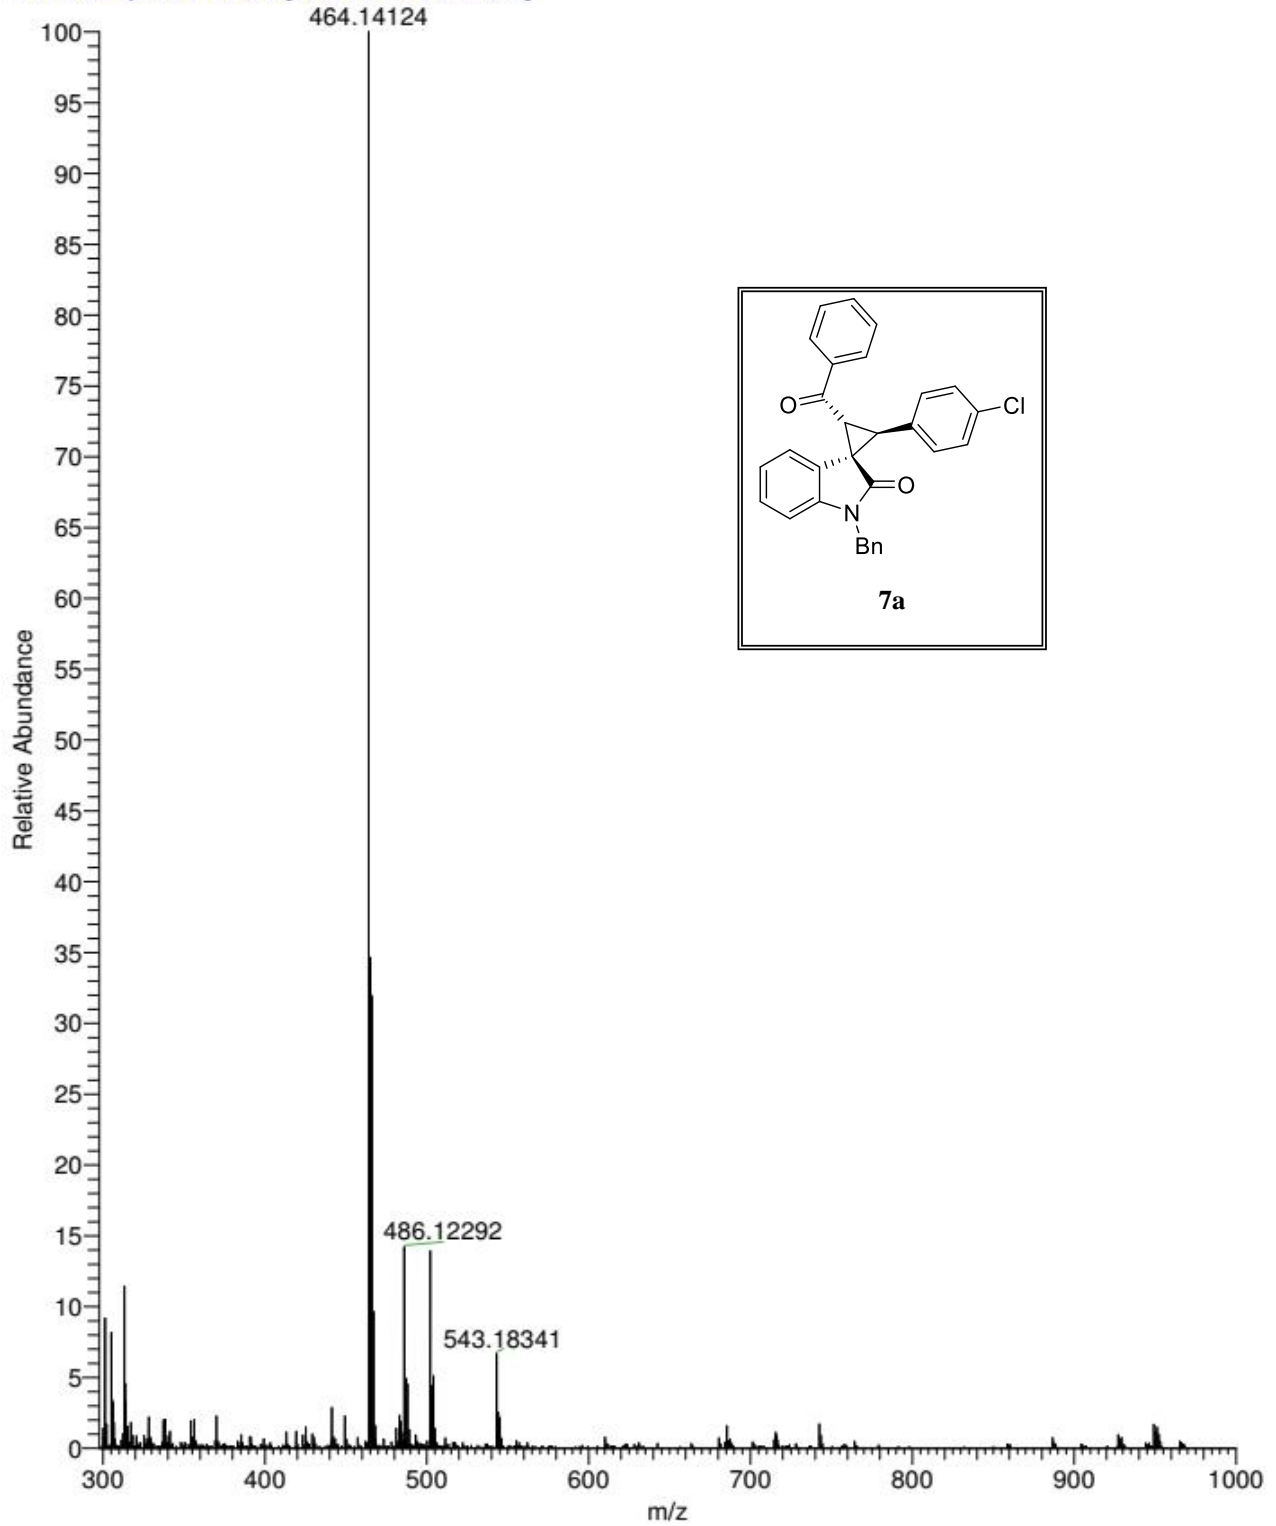

# Compound 7b

APR-658 #37 RT: 0.38 AV: 1 NL: 2.88E7  
T: FTMS + p ESI Full ms [100.0000-1000.0000]

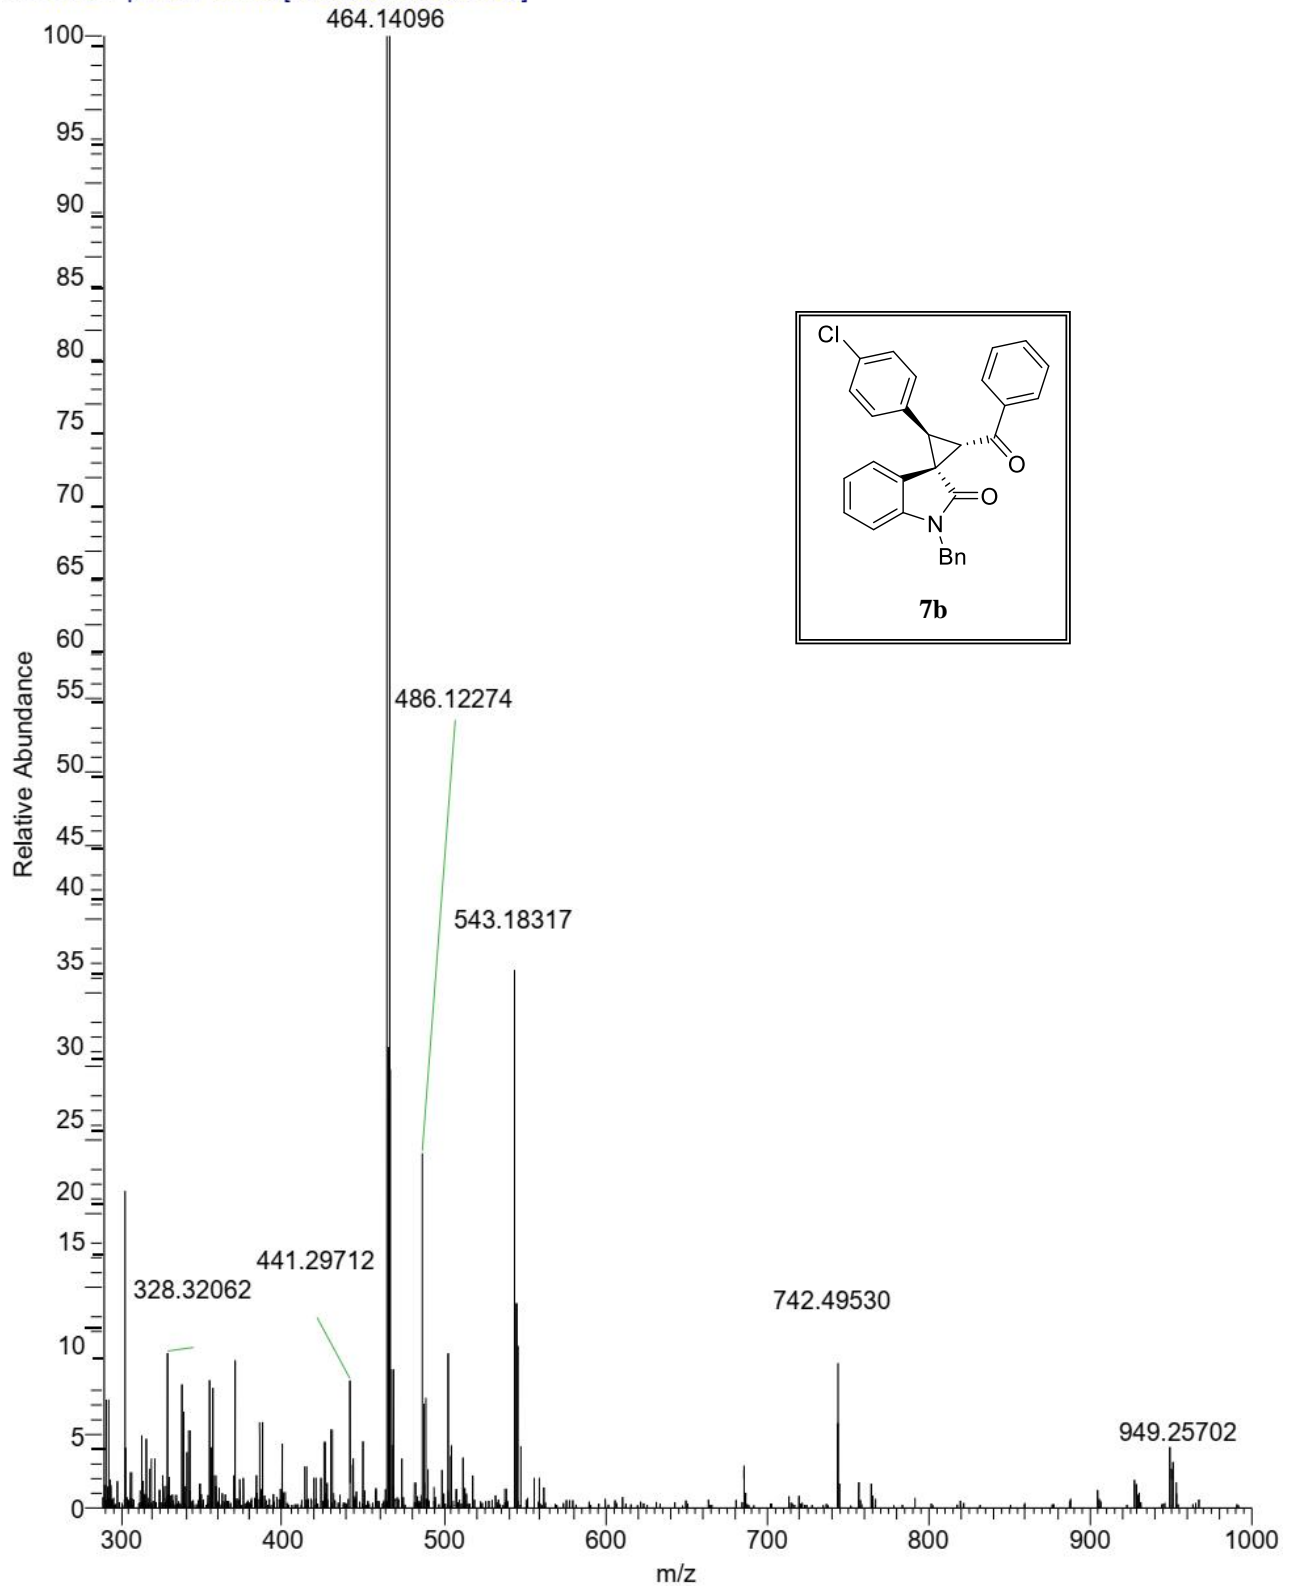

# Compound 9a

APR-679 #41 RT: 0.40 AV: 1 NL: 6.83E7  
T: FTMS + p ESI Full ms [100.0000-1000.0000]

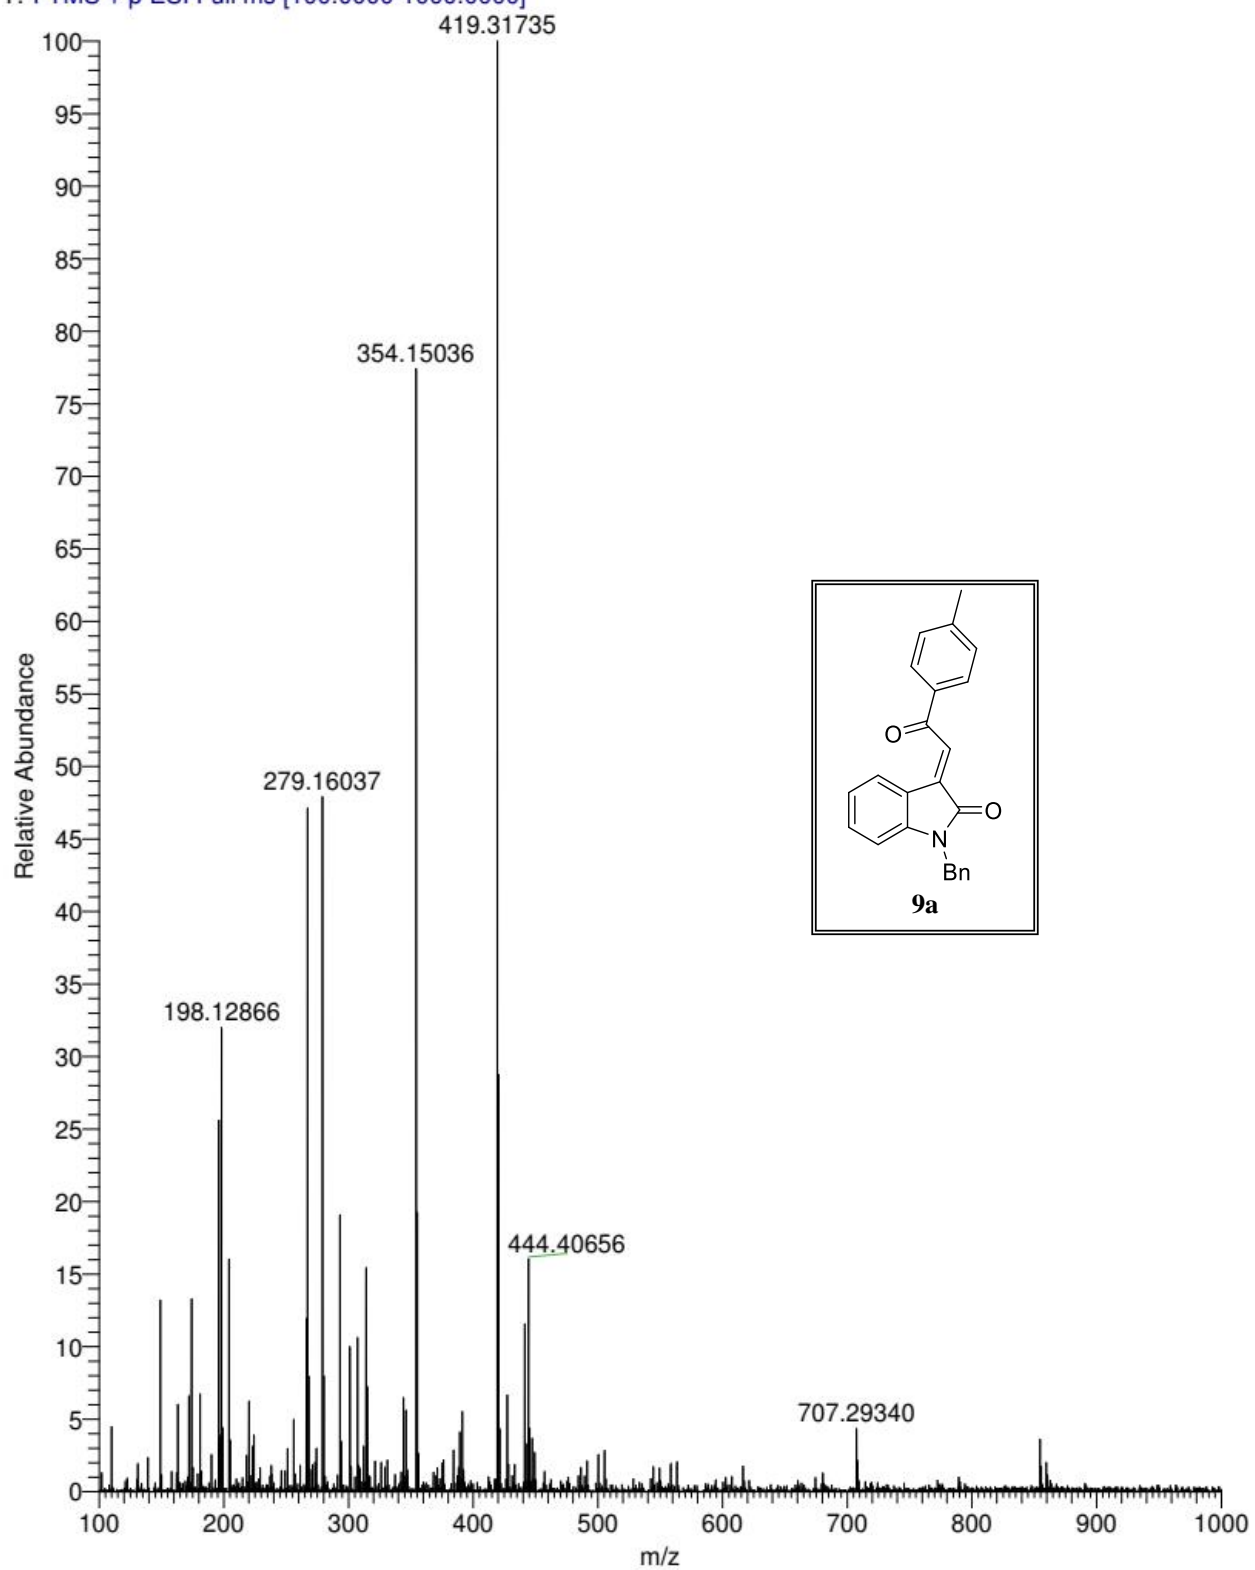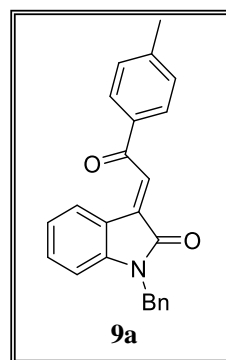

# Compound 10a

APR-512 #37 RT: 0.39 AV: 1 NL: 2.30E8  
T: FTMS + p ESI Full ms [150.0000-1000.0000]

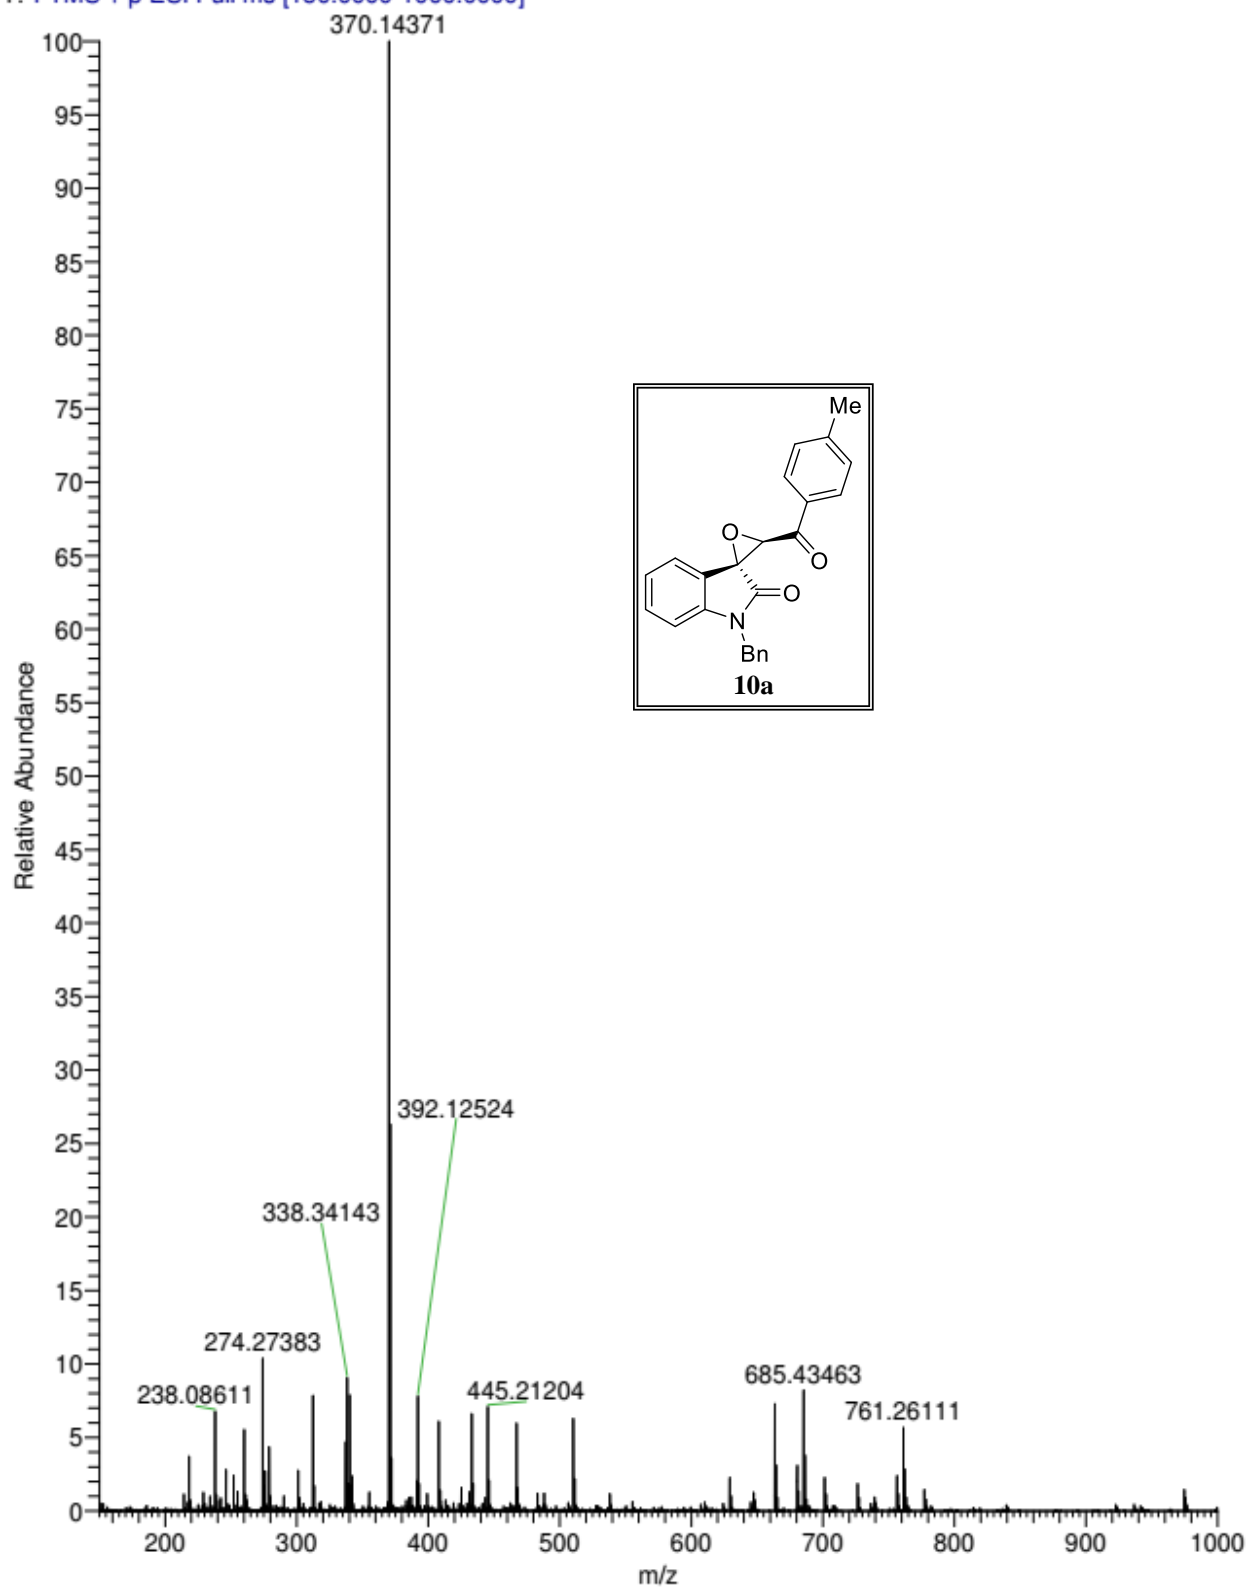

# Compound 10b

APR-533\_20191014172041 #45 RT: 0.44 AV: 1 NL: 2.97E7

T: FTMS + p ESI Full ms [100.0000-1000.0000]

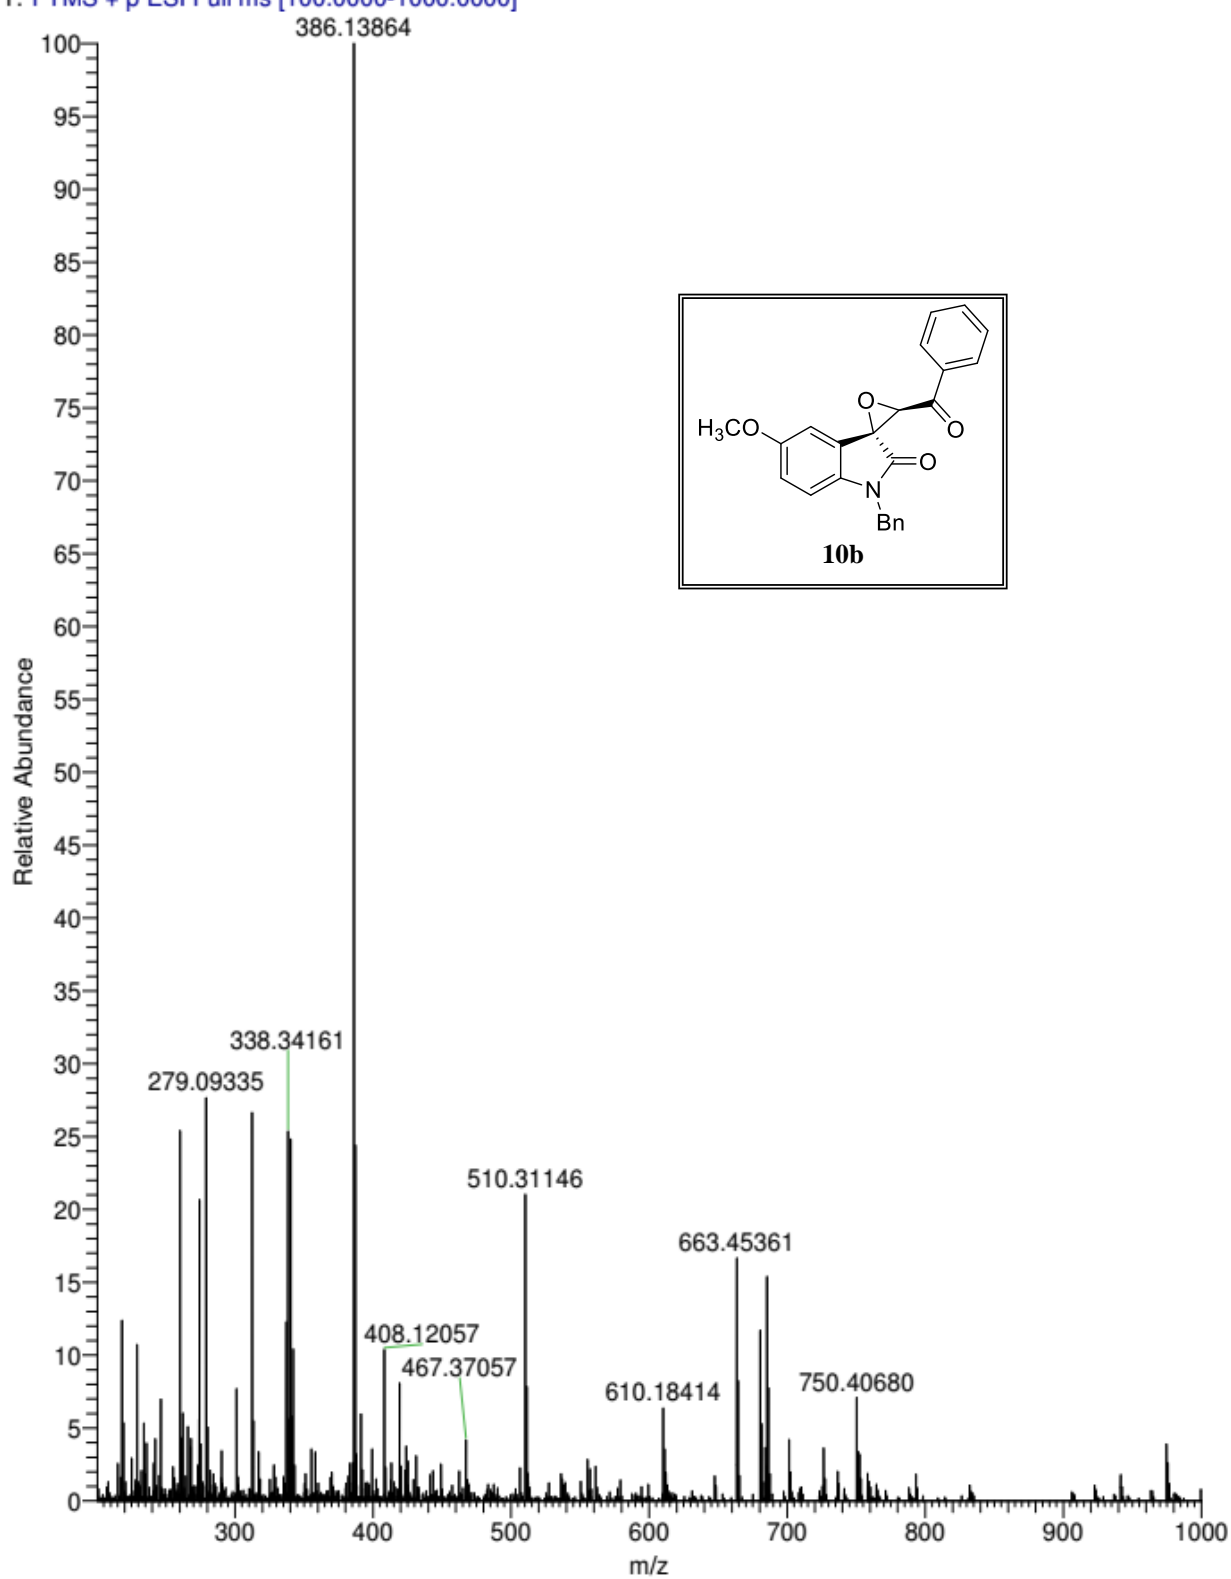



# Compound 10c

APR-538 #37 RT: 0.38 AV: 1 NL: 1.40E7  
T: FTMS + p ESI Full ms [100.0000-1000.0000]

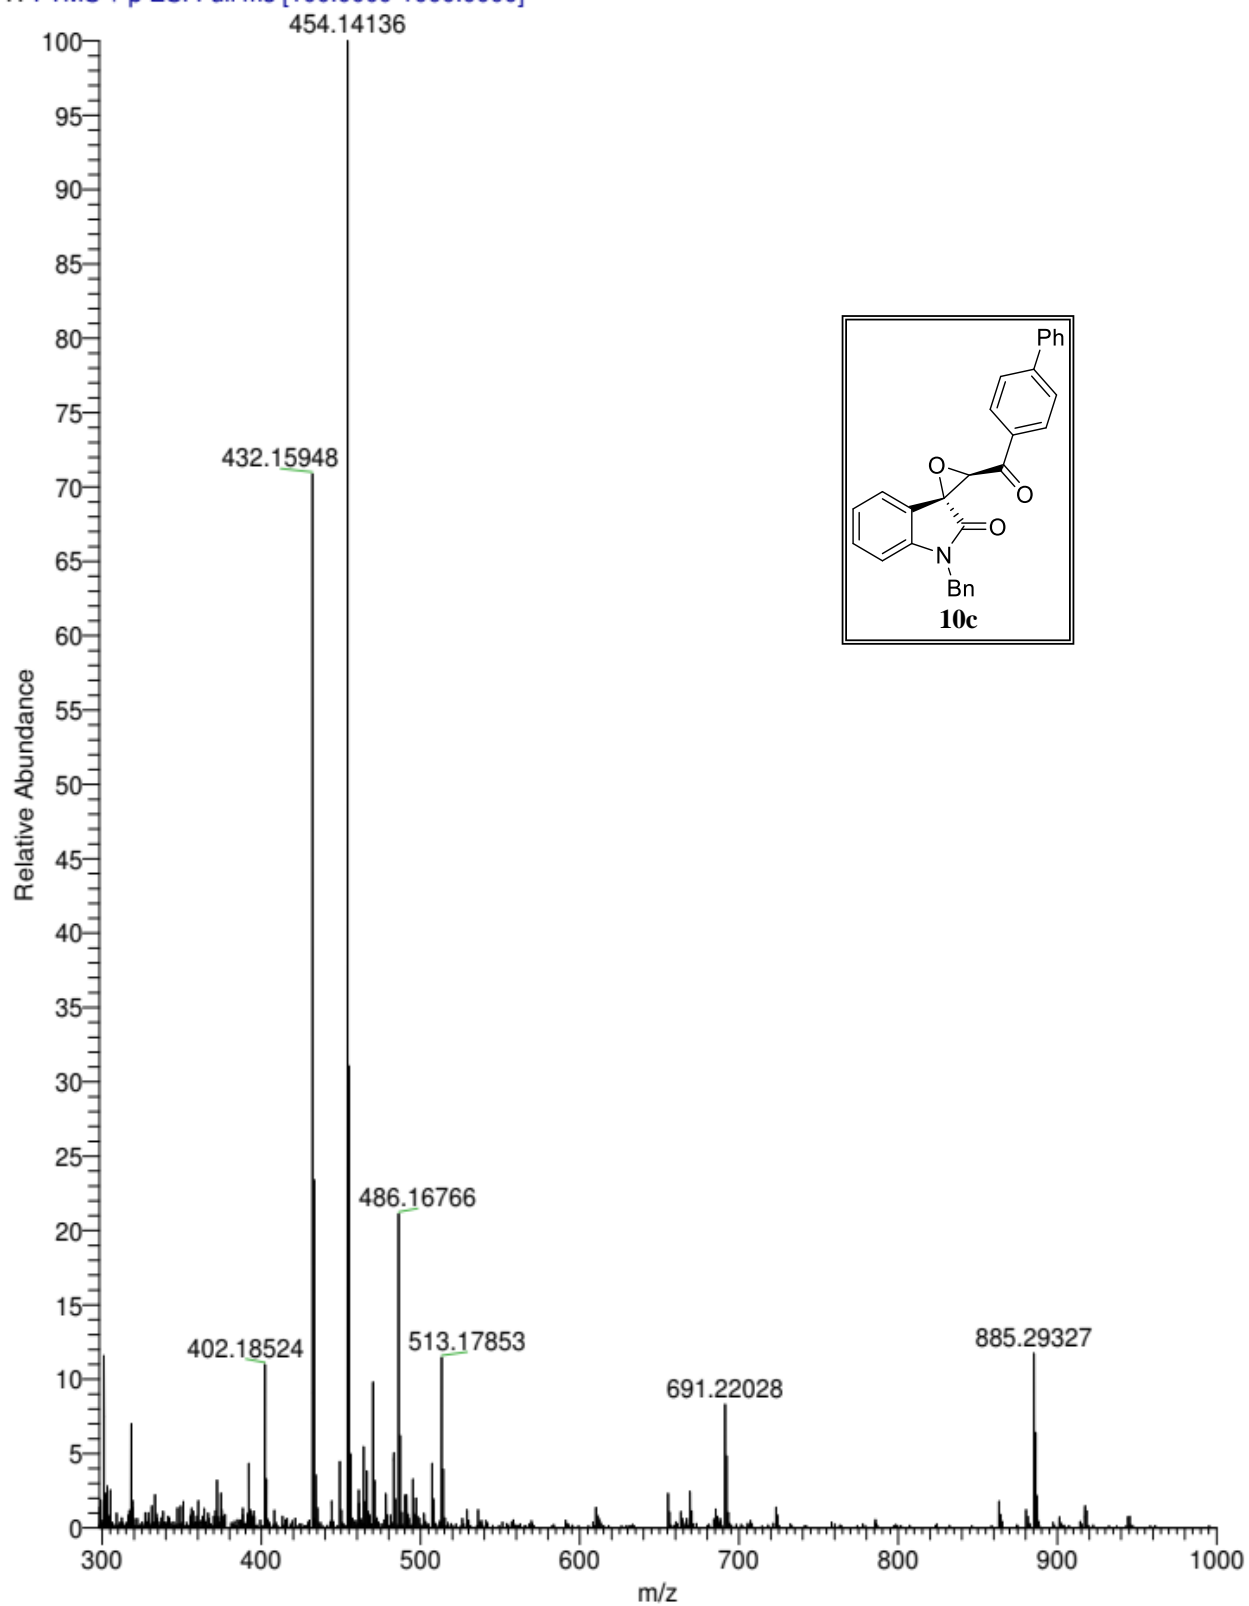

# Compound **10d**

APR-569 #61 RT: 0.61 AV: 1 NL: 2.70E7  
T: FTMS + p ESI Full ms [100.0000-1000.0000]

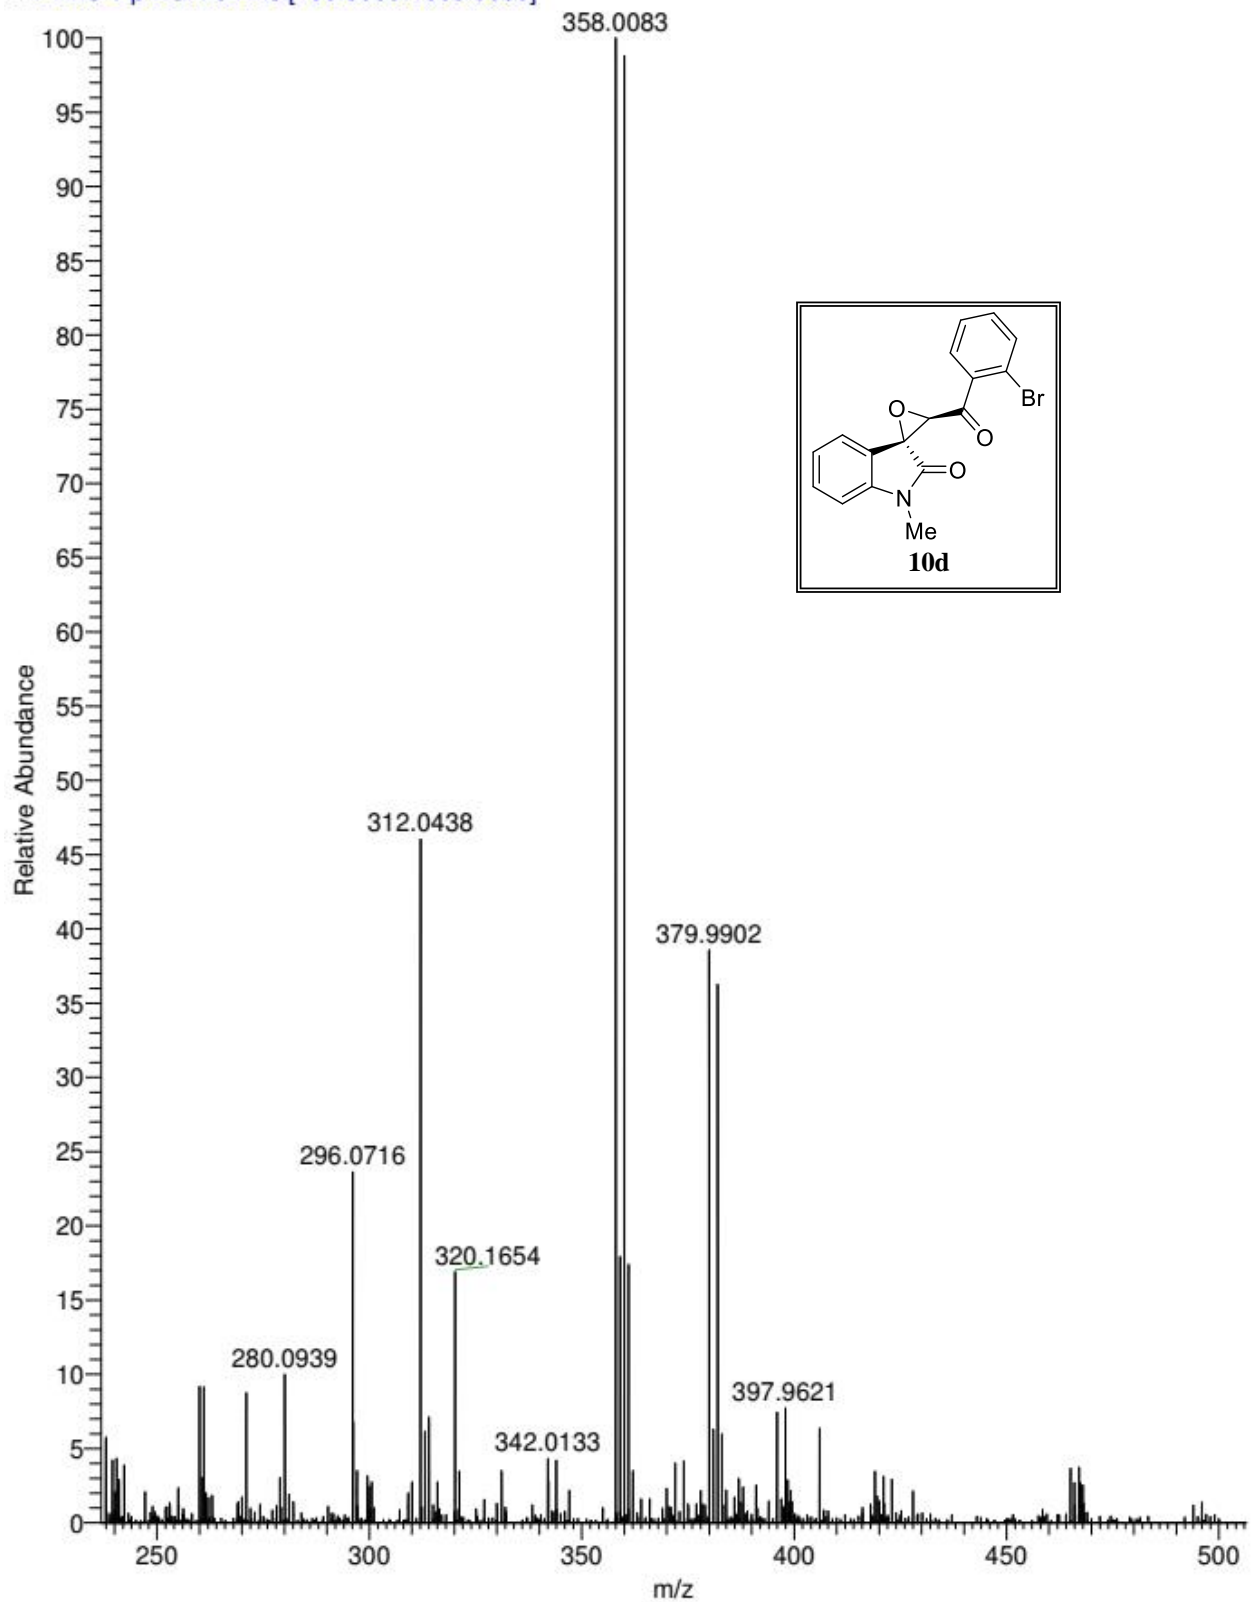

# Compound 10e

APR-543 #41 RT: 0.41 AV: 1 NL: 1.25E8  
T: FTMS + p ESI Full ms [100.0000-1000.0000]

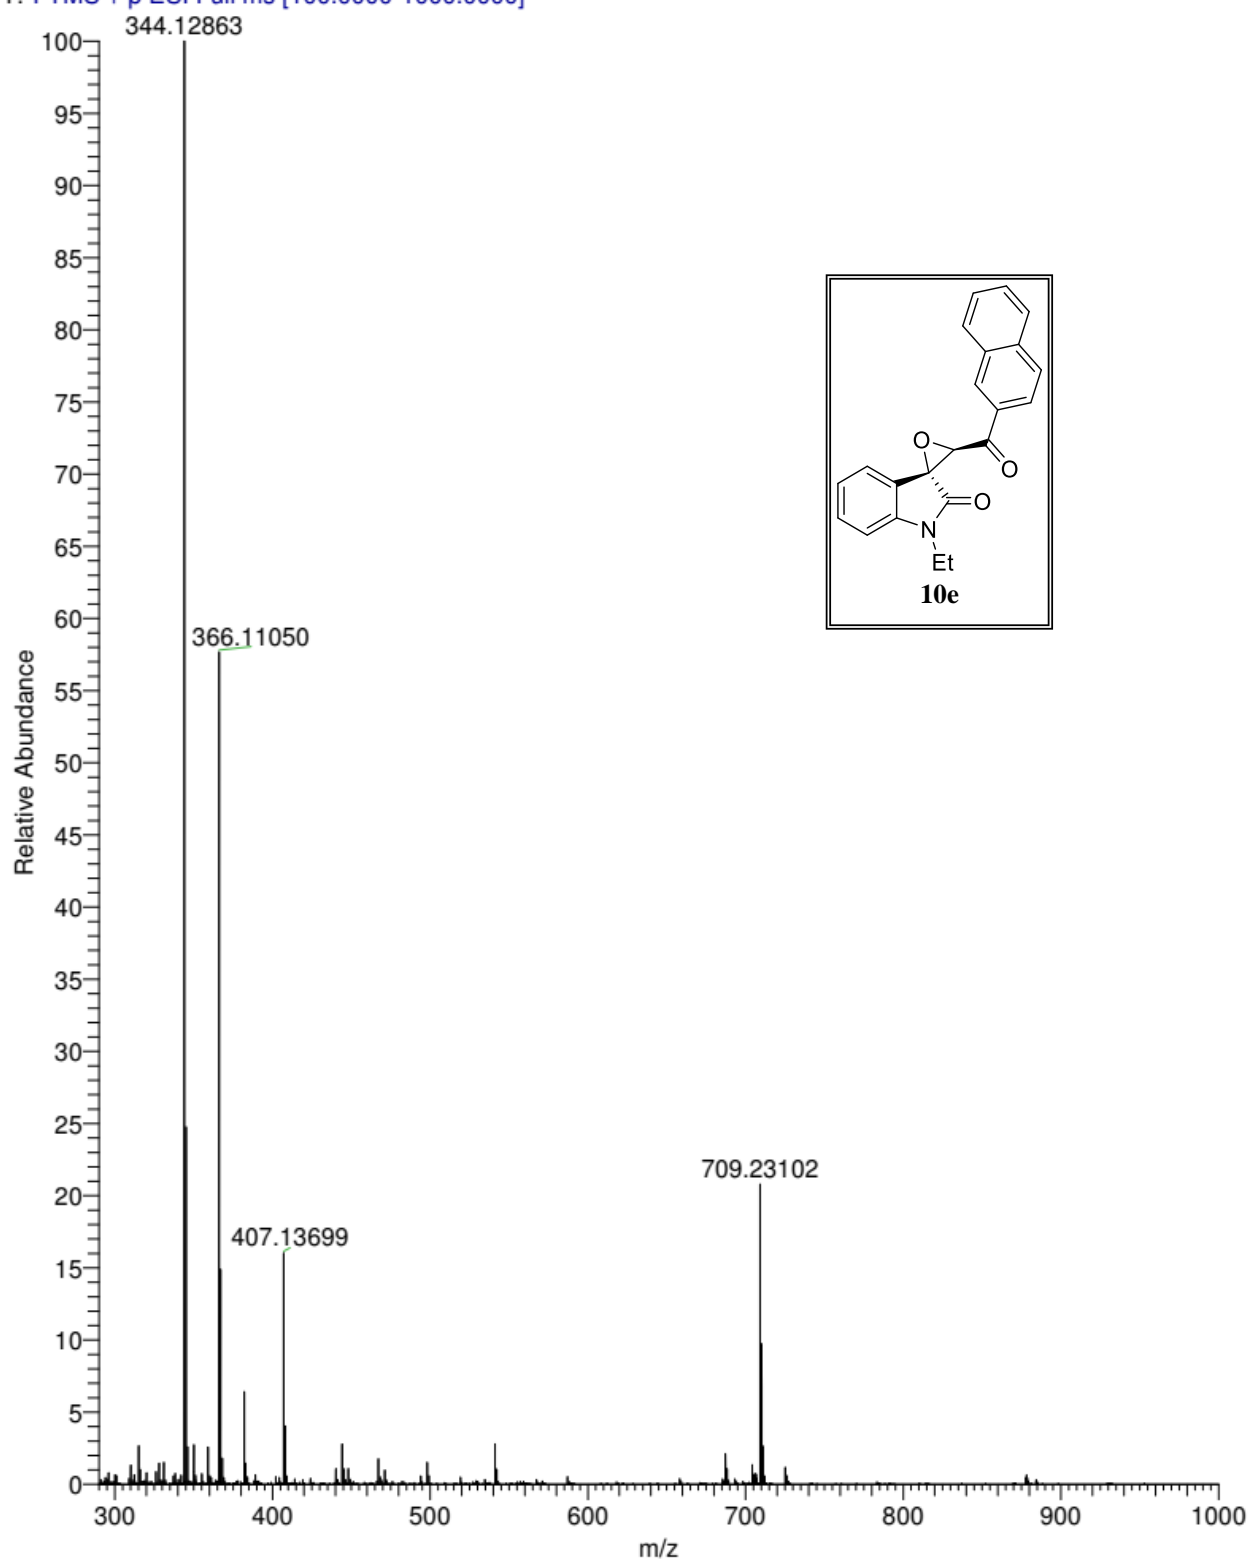

# Compound 11a

APR-373 #39 RT: 0.39 AV: 1 NL: 1.11E8  
T: FTMS + p ESI Full ms [100.0000-1000.0000]

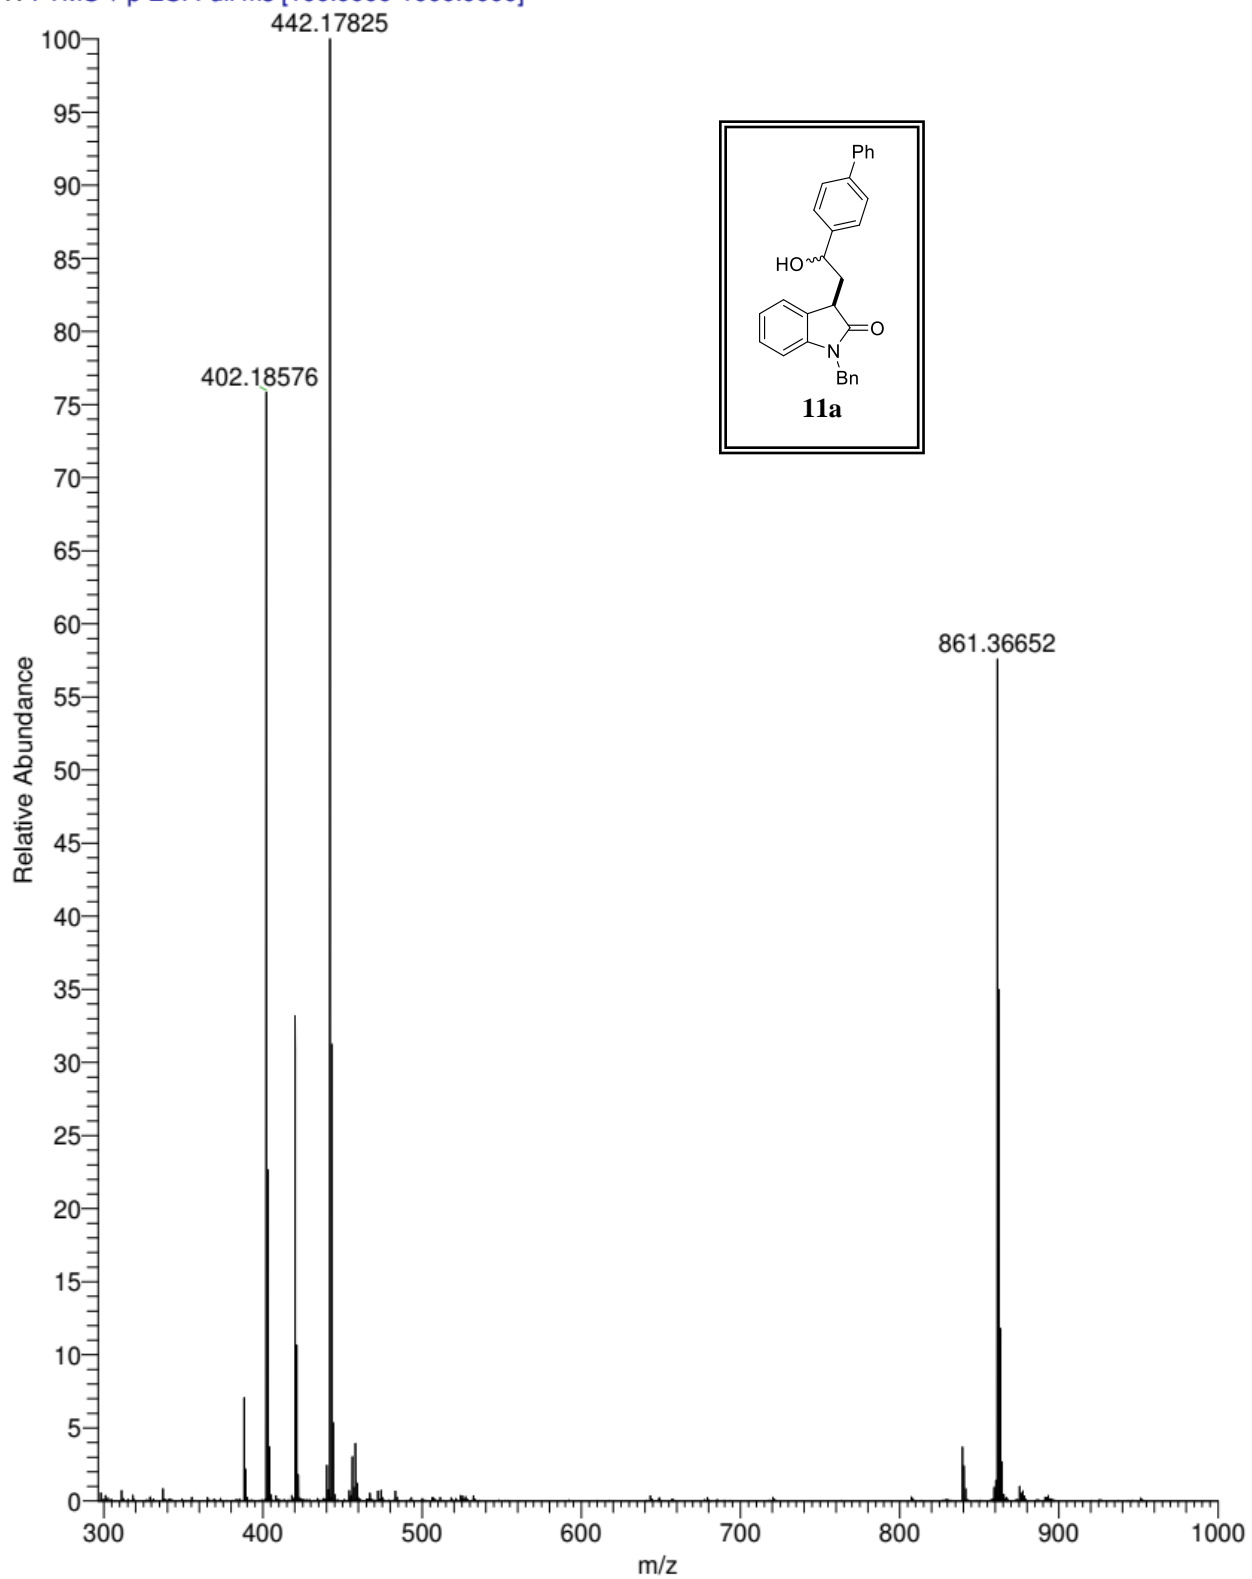

# Compound 11b

APR-695 #54 RT: 0.52 AV: 1 NL: 3.53E8  
T: FTMS + p ESI Full ms [133.4000-2000.0000]

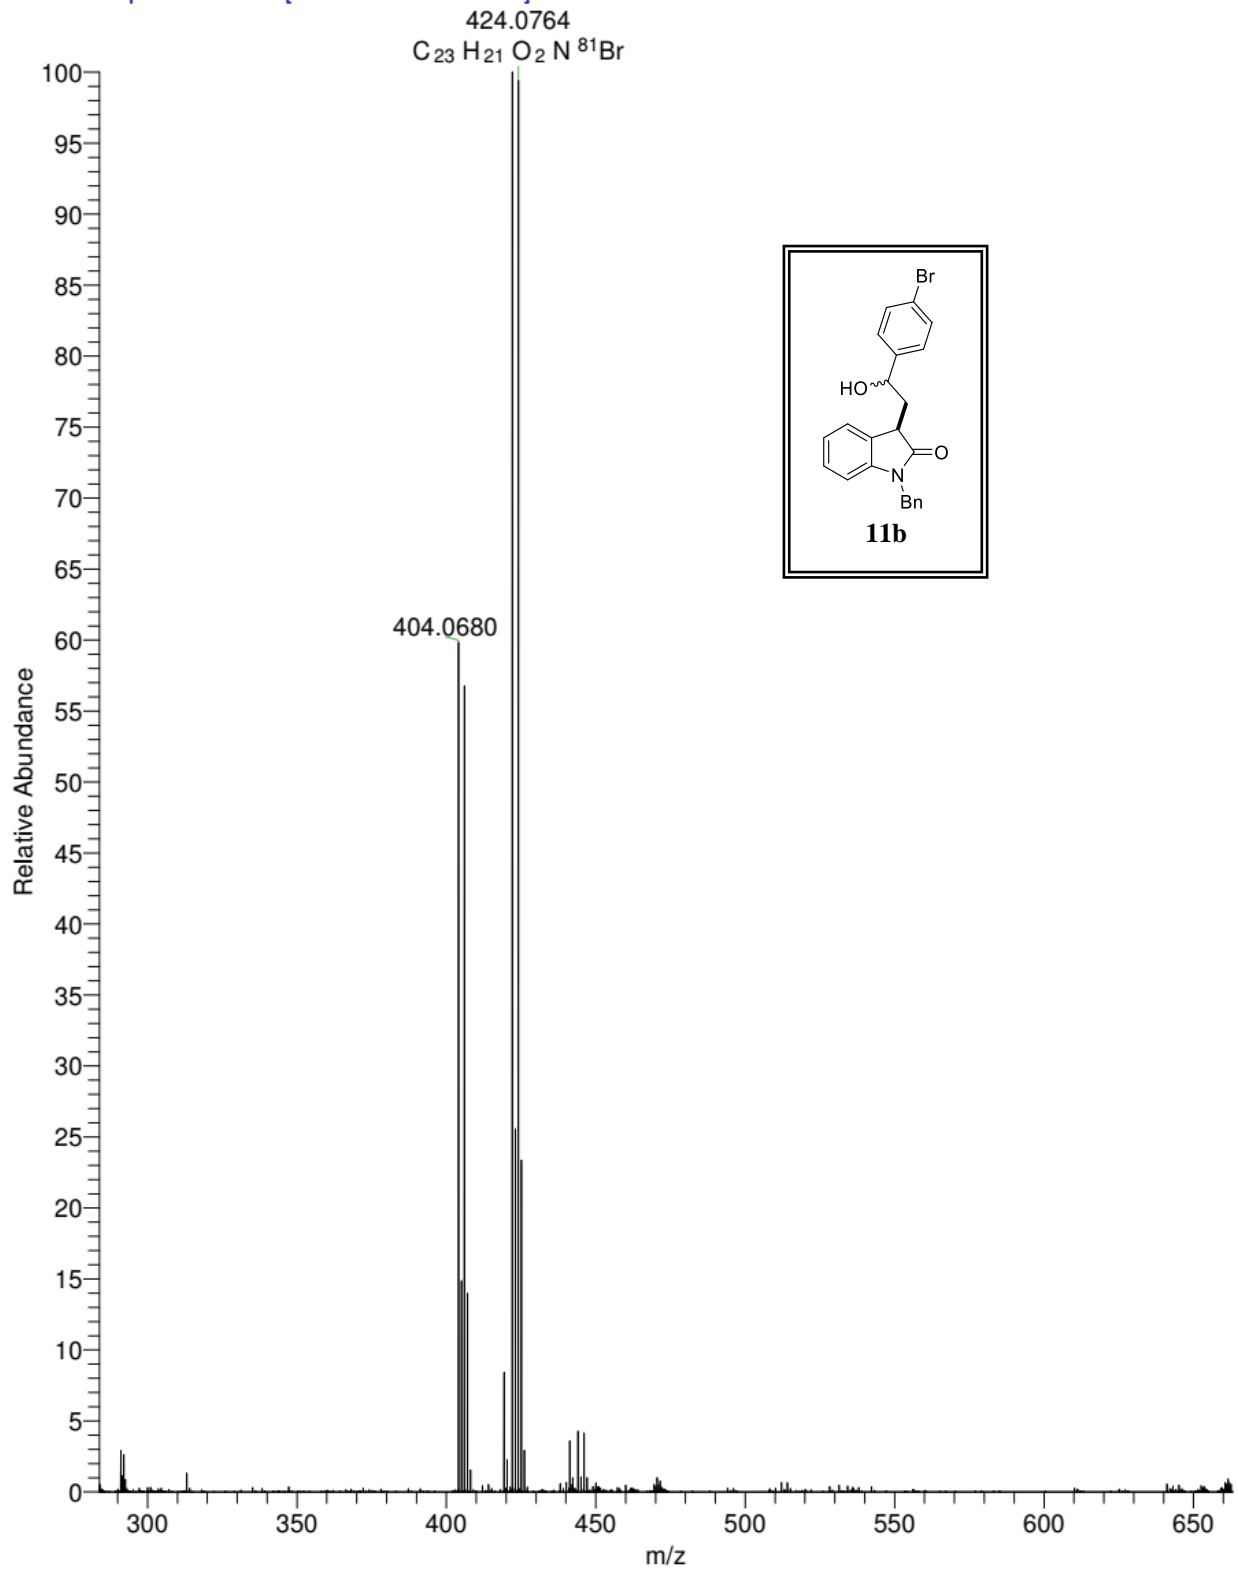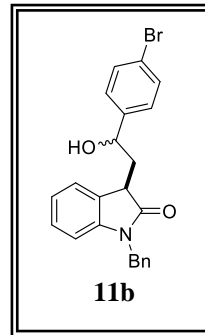

# Compound 12

APR-540 #39 RT: 0.40 AV: 1 NL: 5.59E8  
T: FTMS + p ESI Full ms [100.0000-1000.0000]

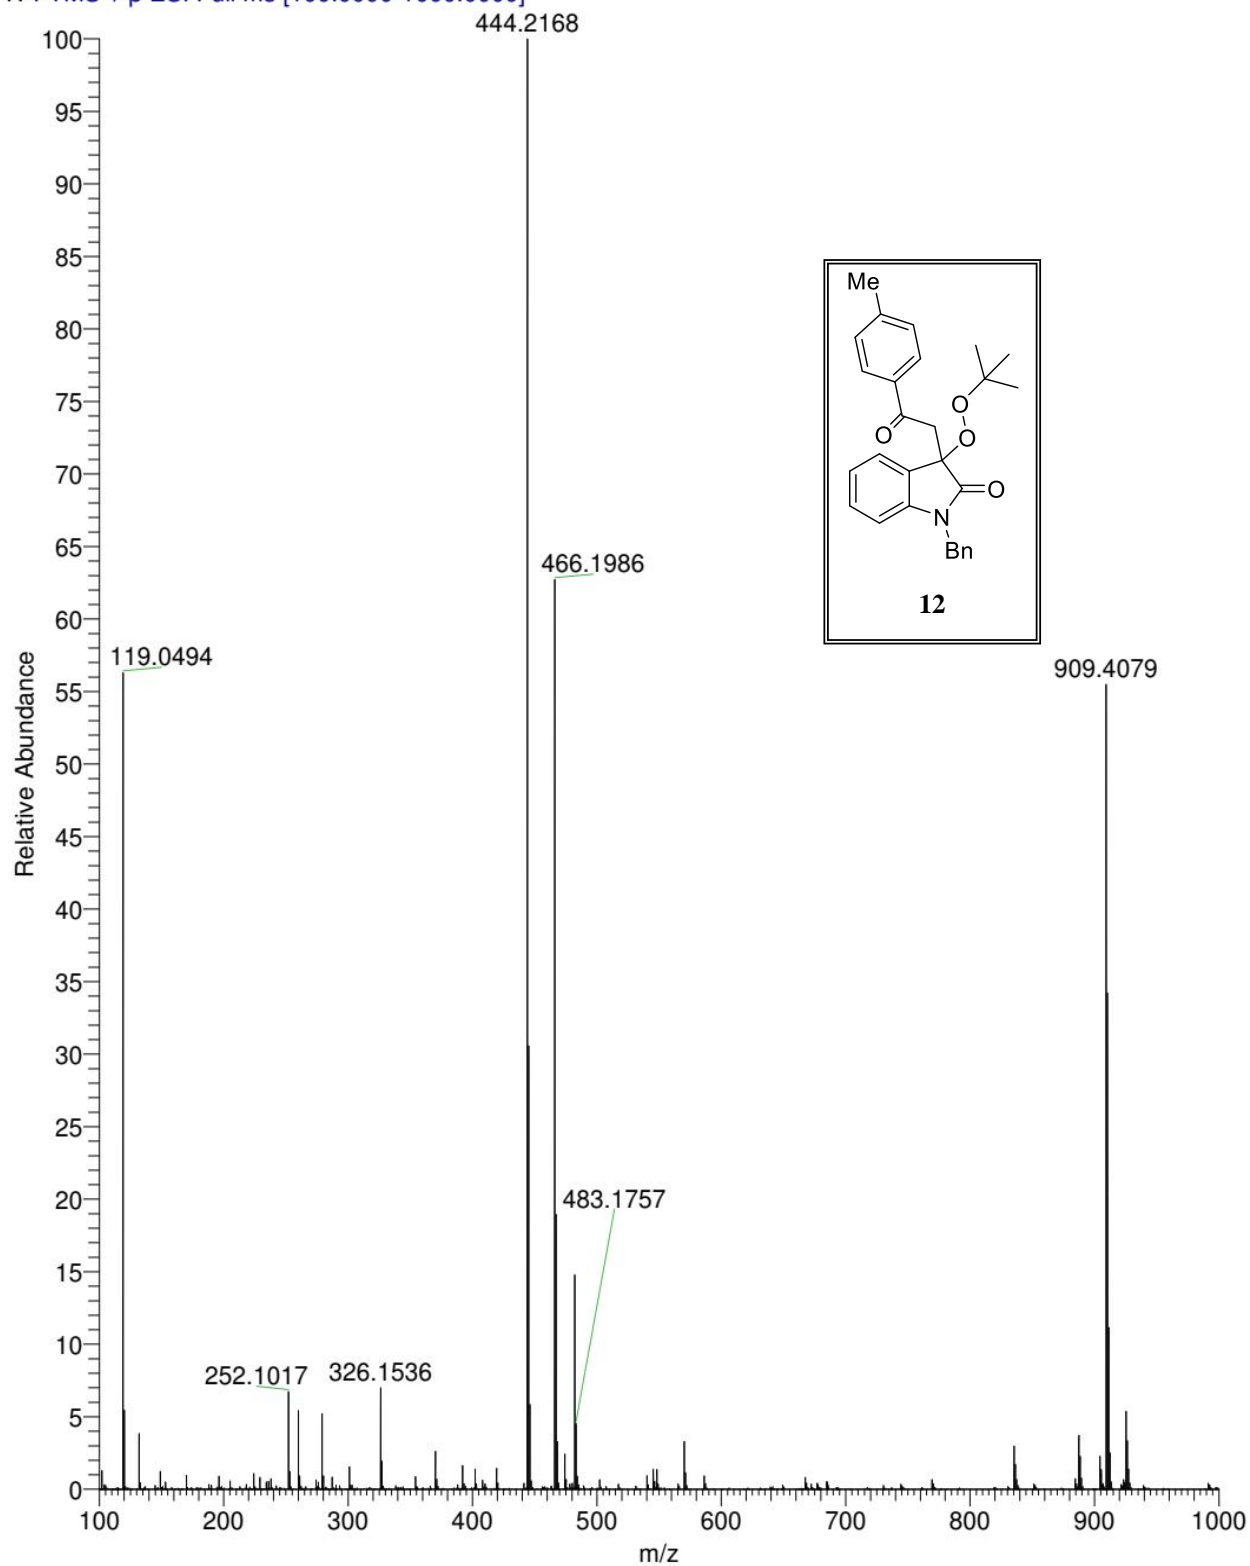

# Compound 13

APR-602 #53 RT: 0.53 AV: 1 NL: 2.44E8  
T: FTMS + p ESI Full ms [100.0000-1000.0000]

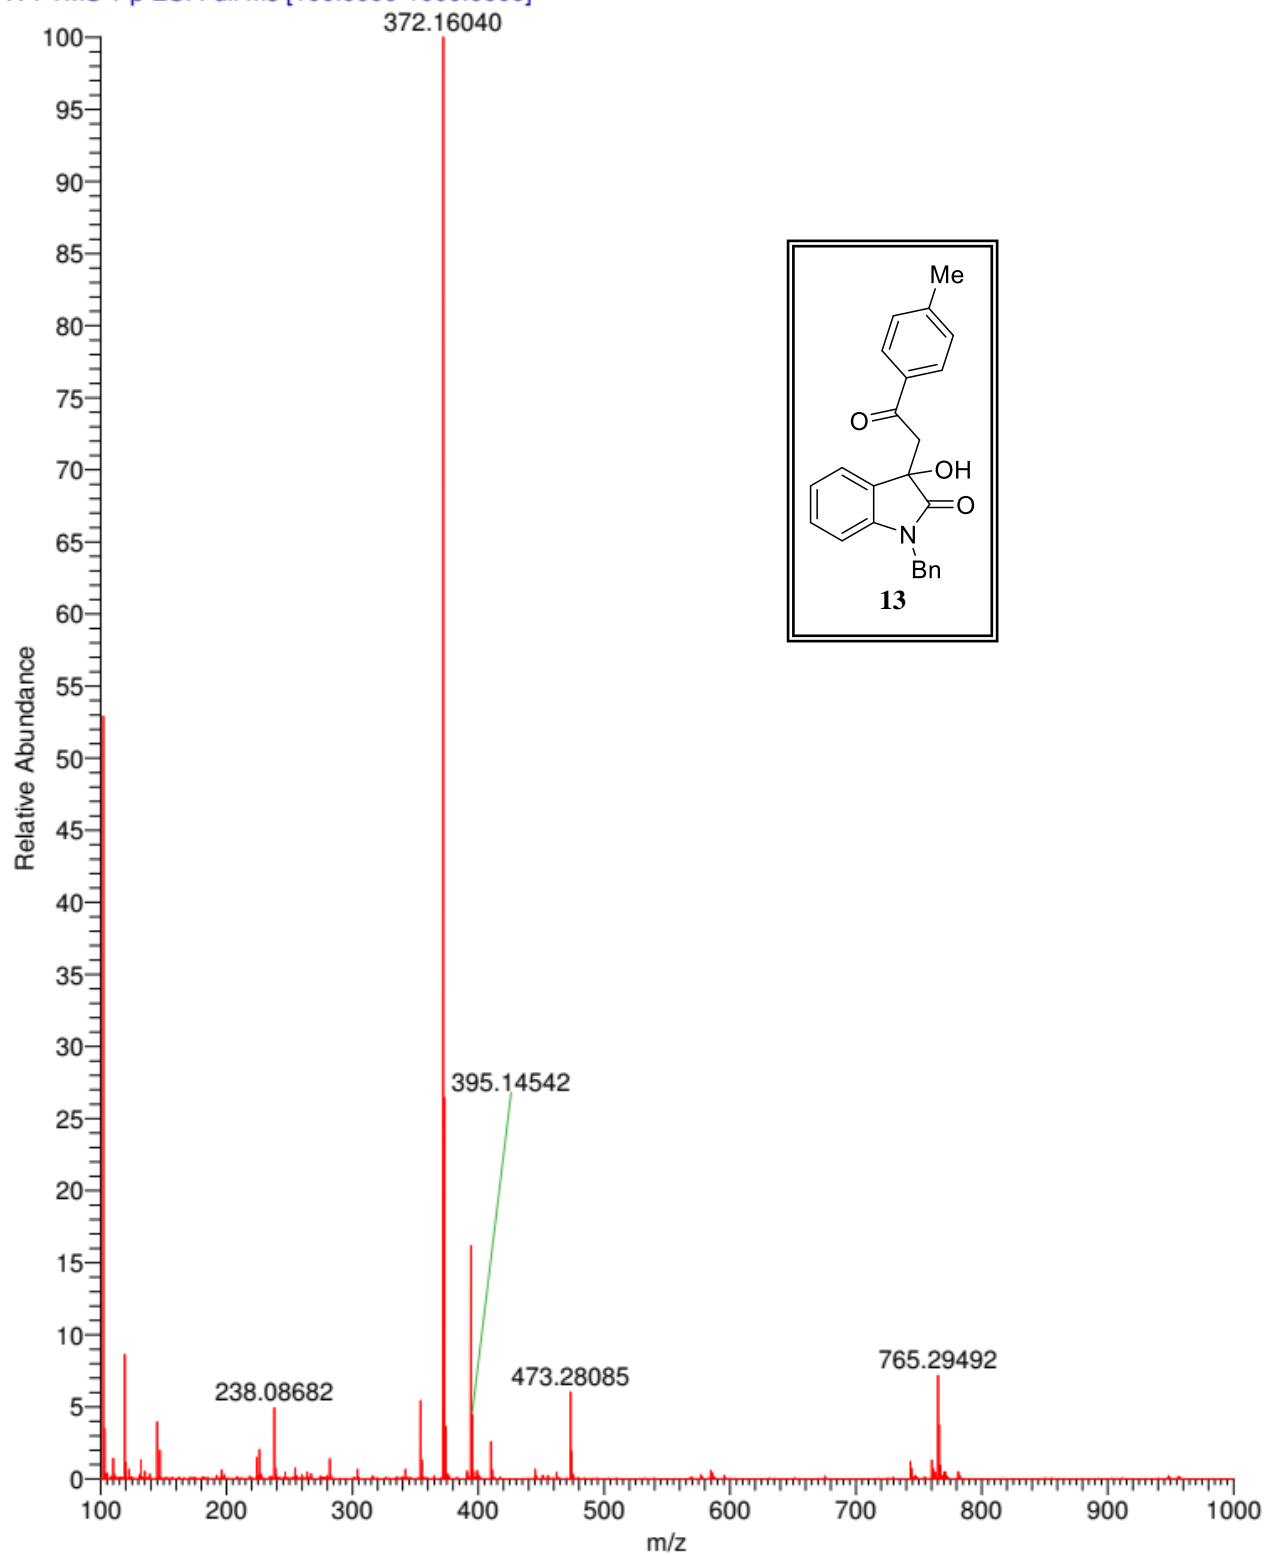

Supplement: d1ob02002a2.pdf [file d1ob02002a2.pdf]
