# Supplementary material for: BF3·OEt2 catalyzed chemoselective CC bond cleavage of α,β-enones: an unexpected synthesis of 3-alkylated oxindoles and spiro-indolooxiranes
Source: Royal Society of Chemistry journal article supplement (doi:10.1039/d1ob02002a), 2021-11-29
Supplement: d1ob02002a1.pdf [file d1ob02002a1.pdf]

## Supporting Information

*for*

### **BF<sub>3</sub>·OEt<sub>2</sub> Catalyzed chemoselective C=C bond cleavage of $\alpha,\beta$ -enones: An unexpected synthesis of 3-alkylated oxindoles and spiro-indolooxiranes**

Sengodagounder Muthusamy\* and Ammasi Prabu

*School of Chemistry, Bharathidasan University, Tiruchirappalli-620 024, India*

\* Tel: +91-431-2407053; Fax: +91-431-2407045; E-mail: [muthu@bdu.ac.in](mailto:muthu@bdu.ac.in)

## CONTENTS

|                                                                                     |          |
|-------------------------------------------------------------------------------------|----------|
| General information                                                                 | S2       |
| General procedure for 3-alkylated oxindoles <b>3</b>                                | S2       |
| Characterization of product <b>3</b>                                                | S3-S14   |
| Characterization of product <b>6</b>                                                | S14-S15  |
| Characterization of product <b>7</b>                                                | S15-S16  |
| Characterization of product <b>8</b>                                                | S16-S17  |
| Optimization, characterization of products <b>9a, 10</b>                            | S17-S22  |
| General procedure and characterization of products <b>11-13</b>                     | S22-S24  |
| NMR-titration experiments                                                           | S24-S28  |
| <sup>1</sup> H and <sup>13</sup> C NMR spectra of product <b>3</b>                  | S29-S80  |
| <sup>1</sup> H and <sup>13</sup> C NMR spectra of products <b>6,7</b>               | S81-S88  |
| <sup>1</sup> H and <sup>13</sup> C NMR spectra of product <b>9a, 10, 11, 12, 13</b> | S89-S108 |
| References                                                                          | S109     |

## General information

Melting points were determined on a capillary melting point apparatus and uncorrected. The solid compounds were crystallized using ethyl acetate and hexane as solvents. IR spectra were recorded using ATR technique on a Bruker Alpha FT-IR spectrophotometer. All compounds were fully characterized. Proton nuclear magnetic resonance ( $^1\text{H}$  NMR) spectra were recorded at 400 MHz using  $\text{CDCl}_3$  in ppm ( $\delta$ ) related to tetramethylsilane ( $\delta=0.00$ ) as an internal standard and are reported as follows; chemical shift (ppm), multiplicity (br = broad, s = singlet, d = doublet, t = triplet, dd = doublet of doublet, m = multiplet), ABq = AB quartet and coupling constant (Hz). Carbon-13 nuclear magnetic resonance ( $^{13}\text{C}$  NMR) spectra were recorded at 100 MHz in  $\text{CDCl}_3$ . Chemical shifts are reported in delta ( $\delta$ ) units, parts per million (ppm) relative to the center of the triplet at 77.7 ppm for  $\text{CDCl}_3$ . Carbon types were determined from  $^{13}\text{C}$  NMR and DEPT experiments. The residual solvent signals were used as references and the chemical shifts converted to the TMS scale ( $\text{CDCl}_3$ :  $\delta_{\text{H}} = 7.26$  ppm,  $\delta_{\text{C}} = 77.7$  ppm). High-resolution mass analyses were performed using the electrospray ionization (ESI) technique on a Thermo Exactive Orbitrap mass spectrometer. All solvents are commercial grade(LR) without distillation. Thin-layer chromatography was performed on silica or alumina plates and components visualized by observation under iodine/UV light at 254 nm. Column chromatography was performed on silica gel (100-200 mesh). All the reactions were conducted in oven-dried glassware under a positive pressure of nitrogen with magnetic stirring. Acetophenone, aldehyde and  $\text{BF}_3 \cdot \text{Et}_2\text{O}$  were purchased from M/s Aldrich and M/s Alfa Aesar and used as provided. The diazoamides<sup>1</sup> and chalcones<sup>2</sup> were prepared according to the literature.

## Experimental Section

### General experimental procedure for the synthesis of alkylated oxindoles **3**

To a solution of diazoamide **1** (1.0 equiv) and chalcone **2** (1.0 equiv) in  $\text{CHCl}_3$  (5 mL) was added 10 mol% of  $\text{BF}_3 \cdot \text{OEt}_2$ . The reaction mixture was stirred at 0 °C under the open-air atmosphere and monitored by TLC until the disappearance of the diazoamide. After the appropriate period, the reaction mixture was diluted with  $\text{CHCl}_3$  (10 mL) and water (15 mL). The organic phase was separated and the aqueous layer was washed with  $\text{CHCl}_3$  (10 mL). The concentration of the combined organic layers under reduced pressure afforded the crude product, which was purified by column chromatography using silica gel to afford the corresponding product **3**.

### Synthesis of 1-benzyl-3-[2-(4-methylphenyl)-2-oxoethyl]-1,3-dihydro-2H-indol-2-one (**3a**)

To a solution of 1-benzyl-3-diazo-1,3-dihydro-2H-indol-2-one (**1a**) (100 mg, 0.40 mmol) and (2E)-1-(4-methylphenyl)-3-phenylprop-2-en-1-one (**2a**) (90 mg, 0.40 mmol) in CHCl<sub>3</sub> (5 mL) was added 10 mol% of BF<sub>3</sub>·OEt<sub>2</sub>. The reaction mixture was stirred at 0 °C under an open-air atmosphere to afford **3a** (103 mg, 73%) as a colorless crystalline solid according to general procedure. R<sub>f</sub> = 0.39 (EtOAc/hexane = 1:4, v/v); mp 146-147 °C; IR (neat): ν<sub>max</sub> 2922, 1708, 1684, 1607, 1462, 1354, 745 cm<sup>-1</sup>; <sup>1</sup>H NMR (CDCl<sub>3</sub>, 400 MHz) δ = 2.40 (s, 3H, CH<sub>3</sub>), 3.44 (dd, J<sub>1</sub> = 18 Hz, J<sub>2</sub> = 9 Hz, 1H, CH), 3.86 (dd, J<sub>1</sub> = 18.1 Hz, J<sub>2</sub> = 2.9 Hz, 1H, CH), 4.16 (dd, J<sub>1</sub> = 8.8 Hz, J<sub>2</sub> = 2.3 Hz, 1H, CH), 4.97 (s, 2H, CH<sub>2</sub>), 6.73 (d, J = 7.6 Hz, 1H, ArH), 6.92-6.96 (m, 1H, ArH), 7.12-7.15 (m, 1H, ArH), 7.23-7.37 (m, 8H, ArH), 7.89 (d, J = 8 Hz, 2H, ArH) ppm; <sup>13</sup>C NMR (CDCl<sub>3</sub>, 100 MHz) δ = 21.7, 40.0, 41.3, 44.0, 109.1, 122.5, 124.5, 127.4, 127.6, 128.0, 128.3, 128.8, 129.2, 129.4, 134.0, 135.0, 143.5, 144.4, 177.9, 196.5 ppm; HRMS (ESI) Calculated for C<sub>24</sub>H<sub>21</sub>NO<sub>2</sub> (M+H)<sup>+</sup>: 356.1651 found: 356.1644.

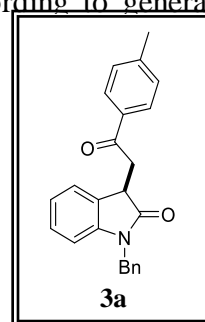

### Synthesis of 1-methyl-3-[2-(4-methylphenyl)-2-oxoethyl]-1,3-dihydro-2H-indol-2-one (**3b**)

To a solution of 3-diazo-1-methyl-1,3-dihydro-2H-indol-2-one (**1b**) (100 mg, 0.58 mmol) and (2E)-1-(4-methylphenyl)-3-phenylprop-2-en-1-one (**2a**) (128, 0.58 mmol) in CHCl<sub>3</sub> (5 mL) was added 10 mol% of BF<sub>3</sub>·OEt<sub>2</sub>. The reaction mixture was stirred at 0 °C under an open-air atmosphere to afford **3b** (110 mg, 68%) as a colorless crystalline solid according to general procedure. R<sub>f</sub> = 0.25 (EtOAc/hexane = 1:4, v/v); mp 198-199 °C; IR (neat): ν<sub>max</sub> 2923, 1704, 1606, 1467, 1345, 1263, 1090, 735 cm<sup>-1</sup>; <sup>1</sup>H NMR (CDCl<sub>3</sub>, 400 MHz) δ = 2.40 (s, 3H, CH<sub>3</sub>), 3.26 (s, 3H, CH<sub>3</sub>), 3.36 (dd, J<sub>1</sub> = 18 Hz, J<sub>2</sub> = 9.2 Hz, 1H, CH), 3.80 (dd, J<sub>1</sub> = 18 Hz, J<sub>2</sub> = 2.8 Hz, 1H, CH), 4.07 (d, J = 9.2 Hz, 1H, CH), 6.85 (d, J = 7.6 Hz, 1H, ArH), 6.98 (t, J = 7.6 Hz, 1H, ArH), 7.25-7.29 (m, 4H, ArH), 7.87 (d, J = 8 Hz, 2H, ArH) ppm; <sup>13</sup>C NMR (CDCl<sub>3</sub>, 100 MHz) δ = 21.7, 26.4, 40.0, 41.2, 108.0, 122.5, 124.5, 128.1, 128.3, 129.2, 129.4, 133.9, 144.3, 144.4, 177.9, 196.6 ppm; HRMS (ESI) Calculated for C<sub>18</sub>H<sub>17</sub>NO<sub>2</sub> (M+H)<sup>+</sup>: 280.1338 found: 280.1333.

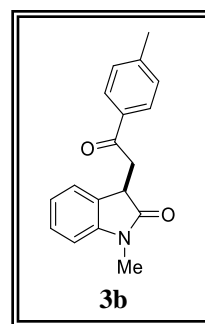

### Synthesis of 1-benzyl-3-(2-oxo-2-phenylethyl)-1,3-dihydro-2H-indol-2-one (**3c**)<sup>3</sup>

To a solution of 1-benzyl-3-diazo-1,3-dihydro-2*H*-indol-2-one (**1a**) (100 mg, 0.40 mmol) and (2*E*)-1,3-diphenylprop-2-en-1-one (**2b**) (83 mg, 40 mmol) in CHCl<sub>3</sub> (5 mL) was added 10 mol% of BF<sub>3</sub>·OEt<sub>2</sub>. The reaction mixture was stirred at 0 °C under an open-air atmosphere to afford **3c** (99 mg, 73%) as a colorless crystalline solid according to general procedure. R<sub>f</sub> = 0.34 (EtOAc/hexane = 1:4, v/v); mp 162-163 °C; IR (neat): ν<sub>max</sub> 3057, 2914, 1702,

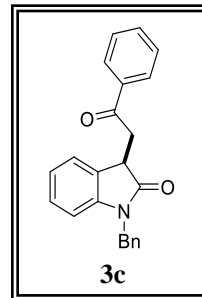

1605, 1356, 1216, 744 cm<sup>-1</sup>; <sup>1</sup>H NMR (CDCl<sub>3</sub>, 400 MHz) δ = 3.47 (dd, *J*<sub>1</sub> = 27.2 Hz, *J*<sub>2</sub> = 9.0 Hz, 1H, CH), 3.89 (dd, *J*<sub>1</sub> = 18.4 Hz, *J*<sub>2</sub> = 3.2 Hz, 1H, CH), 4.17 (dd, *J*<sub>1</sub> = 8.8 Hz, *J*<sub>2</sub> = 2.8 Hz, 1H, CH), 4.97 (s, 2H, CH<sub>2</sub>), 6.74 (d, *J* = 7.6 Hz, 1H, ArH), 6.95 (t, *J* = 7.6 Hz, 1H, ArH), 7.14 (t, *J* = 7.6 Hz, 1H, ArH), 7.25-7.38 (m, 6H, ArH) 7.45-7.49 (m, 2H, ArH), 7.56-7.59 (m, 1H, ArH), 7.98-8.01 (m, 2H, ArH) ppm; <sup>13</sup>C NMR (CDCl<sub>3</sub>, 100 MHz) δ = 40.1, 41.3, 44.0, 109.1, 122.6, 124.4, 127.4, 127.7, 128.1, 128.2, 128.8, 128.9, 129.1, 133.5, 136.0, 136.4, 143.5, 177.9, 196.9 ppm; HRMS (ESI) Calculated for C<sub>23</sub>H<sub>19</sub>NO<sub>2</sub> (M+H)<sup>+</sup>: 342.1494 found: 342.1485.

#### Synthesis of 1-benzyl-3-[2-(4-methoxyphenyl)-2-oxoethyl]-1,3-dihydro-2*H*-indol-2-one (**3d**)<sup>4</sup>

To a solution of 1-benzyl-3-diazo-1,3-dihydro-2*H*-indol-2-one (**1a**) (100 mg, 0.40 mmol) and (2*E*)-1-(4-methoxyphenyl)-3-phenylprop-2-en-1-one (**2c**) (95 mg, 0.40 mmol) in CHCl<sub>3</sub> (5 mL) was added 10 mol% of BF<sub>3</sub>·OEt<sub>2</sub>. The reaction mixture was stirred at 0 °C under an open-air atmosphere to afford **3d** (105 mg, 71%) as a colorless crystalline solid according to general procedure. R<sub>f</sub> = 0.18 (EtOAc/hexane = 1:4, v/v); mp 166-

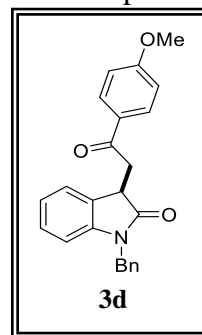

167 °C; IR (neat): ν<sub>max</sub> 2924, 1705, 1674, 1595, 1359, 1165 698 cm<sup>-1</sup>; <sup>1</sup>H NMR (CDCl<sub>3</sub>, 400 MHz) δ = 3.42 (dd, *J*<sub>1</sub> = 18.0 Hz, *J*<sub>2</sub> = 9.0 Hz, 1H, CH), 3.82 (d, *J* = 2.8 Hz, 1H, CH), 3.87 (s, 3H, CH<sub>3</sub>), 4.17 (d, *J* = 7.6 Hz, 1H, CH), 4.97 (s, 2H, CH<sub>2</sub>), 6.73 (d, *J* = 7.6 Hz, 1H, ArH), 6.93-6.97 (m, 3H, ArH), 7.14 (t, *J* = 7.6 Hz, 1H, ArH), 7.24-7.37 (m, 6H, ArH), 7.98 (d, *J* = 8.8 Hz, 2H, ArH) ppm; <sup>13</sup>C NMR (CDCl<sub>3</sub>, 100 MHz) δ = 39.7, 41.4, 44.0, 55.5, 109.0, 113.9, 122.5, 124.5, 127.4, 127.6, 128.0, 129.3, 129.5, 130.5, 136.0, 143.4, 163.8, 178.0, 195.3 ppm; HRMS (ESI) Calculated for C<sub>24</sub>H<sub>21</sub>NO<sub>3</sub> (M+H)<sup>+</sup>: 372.1600 found: 372.1594

#### Synthesis of 3-[2-([1,1'-biphenyl]-4-yl)-2-oxoethyl]-1-benzyl-1,3-dihydro-2*H*-indol-2-one (**3f**)<sup>5</sup>

To a solution of 1-benzyl-3-diazo-1,3-dihydro-2*H*-indol-2-one (**1a**) (100 mg, 0.40 mmol) and (2*E*)-1-([1,1'-biphenyl]-4-yl)-3-phenylprop-2-en-1-one (**2d**) (114 mg, 0.40 mmol) in CHCl<sub>3</sub> (5

mL) was added 10 mol% of  $\text{BF}_3 \cdot \text{OEt}_2$ . The reaction mixture was stirred at 0 °C under an open-air atmosphere to afford **3f** (105 mg, 63%) as a colorless crystalline solid according to general procedure.  $R_f = 0.30$  (EtOAc/hexane = 1:4, v/v); mp 161-162 °C; IR (neat):  $\nu_{\text{max}}$  2921, 1707, 1605, 1481, 1353, 1273, 753  $\text{cm}^{-1}$ ;  $^1\text{H}$  NMR ( $\text{CDCl}_3$ , 400 MHz)  $\delta = 3.43$  (dd,  $J_1 = 18.1$  Hz,  $J_2 = 9.0$  Hz, 1H, CH), 3.85 (dd,  $J_1 = 18.1$  Hz,  $J_2 = 3.0$  Hz, 1H, CH), 4.12 (dd,  $J_1 = 8.8$  Hz,  $J_2 = 2.5$  Hz, 1H, CH), 4.91 (s, 2H,  $\text{CH}_2$ ), 6.67 (d,  $J = 7.6$  Hz, 1H, ArH), 6.89 (t,  $J = 7.6$  Hz, 1H, ArH), 7.08 (t,  $J = 7.6$  Hz, 1H, ArH), 7.17-7.41 (m, 9H, ArH), 7.54-7.63 (m, 4H), 8.00 (d,  $J = 8.4$  Hz, 2H, ArH) ) ppm;  $^{13}\text{C}$  NMR ( $\text{CDCl}_3$ , 100 MHz)  $\delta = 40.1, 41.3, 44.0, 109.1, 122.6, 124.5, 127.3, 127.7, 128.1, 128.4, 128.8, 129.0, 129.1, 135.1, 135.9, 139.8, 143.5, 146.2, 177.9, 196.5$  ppm; HRMS (ESI) Calculated for  $\text{C}_{29}\text{H}_{23}\text{NO}_2$  ( $\text{M}+\text{Na}$ ) $^+$ : 440.1626 found: 440.1621.

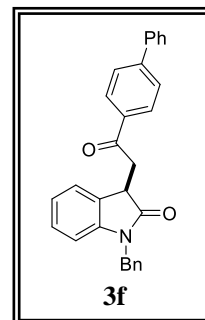

### Synthesis of 1-benzyl-3-[2-oxo-2-(2,4,6-trimethylphenyl)ethyl]-1,3-dihydro-2H-indol-2-one (**3g**)

To a solution of 1-benzyl-3-diazo-1,3-dihydro-2H-indol-2-one (**1a**) (100 mg, 0.40 mmol) and (2E)-3-phenyl-1-(2,4,6-triisopropylphenyl)prop-2-en-1-one (**2e**) (134 mg, 0.40 mmol) in  $\text{CHCl}_3$  (5 mL) was added 10 mol% of  $\text{BF}_3 \cdot \text{OEt}_2$ . The reaction mixture was stirred at 0 °C under an open-air atmosphere to afford **3g** (106 mg, 57%) as a colorless amorphous solid according to general procedure.  $R_f = 0.51$  (EtOAc/hexane = 1.5:3.5, v/v); mp 116-117 °C; IR (neat):  $\nu_{\text{max}}$  2961, 1706, 1610, 1461, 1354, 1211, 1008, 741  $\text{cm}^{-1}$ ;  $^1\text{H}$  NMR ( $\text{CDCl}_3$ , 400 MHz)  $\delta = 1.06$ -1.16 (m, 18H,  $\text{CH}_3$ ), 2.56-2.65 (m, 2H,  $\text{CH}_2$ ), 2.76-2.83 (m, 1H, CH), 3.14 (dd,  $J_1 = 19.0$  Hz,  $J_2 = 8.2$  Hz, 1H, CH), 3.50 (dd,  $J_1 = 18.6$  Hz,  $J_2 = 3.0$  Hz, 1H, CH), 3.97-3.99 (m, 1H, CH), 4.87 (ABq,  $\Delta\delta_{AB} = 0.08$ ,  $J = 15.7$  Hz, 2H,  $\text{CH}_2$ ), 6.66 (d,  $J = 7.6$  Hz, 1H, ArH), 6.91-6.94 (m, 3H, ArH), 7.06-7.28 (m, 7H, ArH) ppm;  $^{13}\text{C}$  NMR ( $\text{CDCl}_3$ , 100 MHz)  $\delta = 24.0, 30.8, 34.4, 41.1, 44.0, 47.3, 109.2, 121.2, 122.3, 124.1, 127.4, 127.6, 128.1, 128.8, 136.0, 136.5, 143.7, 143.9, 149.9, 177.5, 207.5$  ppm; HRMS (ESI) Calculated for  $\text{C}_{32}\text{H}_{37}\text{NO}_2$  ( $\text{M}+\text{H}$ ) $^+$ : 468.2903 found: 468.2897.

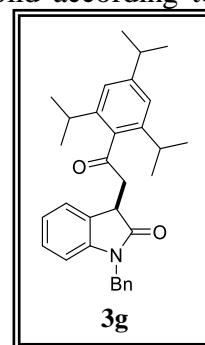

### Synthesis of 1-benzyl-3-[2-(4-fluorophenyl)-2-oxoethyl]-1,3-dihydro-2H-indol-2-one (**3i**)

To a solution of 1-benzyl-3-diazo-1,3-dihydro-2H-indol-2-one (**1a**) (100 mg, 0.40 mmol) and (2E)-1-(4-fluorophenyl)-3-phenylprop-2-en-1-one (**2f**) (90 mg, 0.40 mmol) in  $\text{CHCl}_3$  (5 mL) was added 10 mol% of  $\text{BF}_3 \cdot \text{OEt}_2$ . The reaction mixture was stirred at 0 °C under an open-air

atmosphere to afford **3i** (90 mg, 63%) as a colorless crystalline solid according to general procedure.  $R_f = 0.24$  (EtOAc/hexane = 1:4, v/v); mp 127-128 °C; IR (neat):  $\nu_{\max}$  2918, 1699, 1601, 1354, 1221, 1160, 841, 739  $\text{cm}^{-1}$ ;  $^1\text{H}$  NMR ( $\text{CDCl}_3$ , 400 MHz)  $\delta = 3.45$  (dd,  $J_1 = 18.2$  Hz,  $J_2 = 8.8$  Hz, 1H, CH), 3.86 (dd,  $J_1 = 18.2$  Hz,  $J_2 = 3.1$  Hz, 1H, CH), 4.16 (dd,  $J_1 = 8.8$  Hz,  $J_2 = 2.7$  Hz, 1H, CH), 4.98 (s, 2H,  $\text{CH}_2$ ), 6.75 (d,  $J = 7.6$  Hz, 1H, ArH), 6.96 (t,  $J = 7.6$  Hz, 1H, ArH), 7.13-7.18 (m, 3H, ArH), 7.23-7.37 (m, 6H, ArH), 8.01-8.05 (m, 2H, ArH) ppm;  $^{13}\text{C}$  NMR ( $\text{CDCl}_3$ , 100 MHz)  $\delta = 40.0, 41.3, 44.0, 109.1, 115.9$  (d,  $J = 22$  Hz), 122.6, 124.4, 127.4, 127.8, 128.1, 128.8, 129.0, 130.9 (d,  $J = 10$  Hz), 132.8 (d,  $J = 2$  Hz), 135.9, 143.5, 166 (d,  $J = 254$  Hz), 177.7, 195.3 ppm; HRMS (ESI) Calculated for  $\text{C}_{23}\text{H}_{18}\text{FNO}_2$  ( $\text{M}+\text{H}$ ) $^+$ : 360.1400 found: 360.1390.

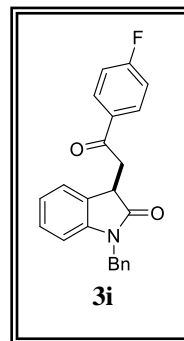

### Synthesis of 3-[2-(4-chlorophenyl)-2-oxoethyl]-1-ethyl-1,3-dihydro-2H-indol-2-one (**3j**)

To a solution of 3-diazo-1-ethyl-1,3-dihydro-2H-indol-2-one (**1c**) (100 mg, 0.53 mmol) and (2E)-1-(4-chlorophenyl)-3-phenylprop-2-en-1-one (**2g**) (130 mg, 0.53 mmol) in  $\text{CHCl}_3$  (5 mL) was added 10 mol% of  $\text{BF}_3 \cdot \text{OEt}_2$ . The reaction mixture was stirred at 0 °C under an open-air atmosphere to afford **3j** (109 mg, 65%) as a colorless amorphous solid according to general procedure.  $R_f = 0.32$  (EtOAc/hexane = 1:4, v/v); mp 151-152 °C; IR (neat):  $\nu_{\max}$  2920, 1705, 1609, 1487, 1356, 1219, 748  $\text{cm}^{-1}$ ;  $^1\text{H}$  NMR ( $\text{CDCl}_3$ , 400 MHz)  $\delta = 1.31$  (t,  $J = 7.6$  Hz, 3H,  $\text{CH}_3$ ), 3.36 (dd,  $J_1 = 18.4$  Hz,  $J_2 = 9.2$  Hz, 1H, CH), 3.76-3.85 (m, 3H,  $\text{CH}_2/\text{CH}$ ), 4.04 (dd,  $J_1 = 9$  Hz,  $J_2 = 2.9$  Hz, 1H, CH), 6.88 (d,  $J = 7.6$  Hz, 1H, ArH), 6.96-7.00 (m, 1H, ArH), 7.23-7.29 (m, 2H, ArH), 7.43-7.45 (m, 2H, ArH), 7.91 (d,  $J = 8.8$  Hz, 2H, ArH) ppm;  $^{13}\text{C}$  NMR ( $\text{CDCl}_3$ , 100 MHz)  $\delta = 12.7, 34.9, 40.0, 41.2, 108.2, 122.3, 124.5, 128.1, 129.0, 129.2, 129.6, 134.7, 139.9, 143.4, 177.1, 195.8$  ppm; HRMS (ESI) Calculated for  $\text{C}_{18}\text{H}_{16}^{35}\text{ClNO}_2$  ( $\text{M}+\text{H}$ ) $^+$ : 314.0948 found: 314.0931.

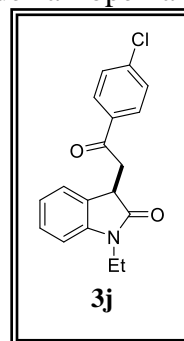

### Synthesis of 3-[2-(2-bromophenyl)-2-oxoethyl]-1-methyl-1,3-dihydro-2H-indol-2-one (**3k**)

To a solution of 3-diazo-1-methyl-1,3-dihydro-2H-indol-2-one (**1b**) (100 mg, 0.58 mmol) and (2E)-1-(2-bromophenyl)-3-phenylprop-2-en-1-one (**2h**) (115 mg, 0.58 mmol) in  $\text{CHCl}_3$  (5 mL) was added 10 mol% of  $\text{BF}_3 \cdot \text{OEt}_2$ . The reaction mixture was stirred at 0 °C under an open-air atmosphere to afford **3k** (120 mg, 60%) as a colorless crystalline solid according to general procedure.  $R_f = 0.40$  (EtOAc/hexane = 1:4, v/v); mp 184-185 °C; IR (neat):  $\nu_{\max}$  3056, 2922, 1693,

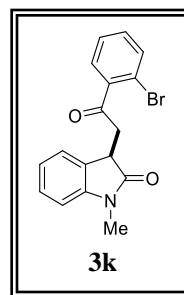

1609, 1353, 1215, 1104, 735  $\text{cm}^{-1}$ ;  $^1\text{H}$  NMR ( $\text{CDCl}_3$ , 400 MHz)  $\delta$  = 3.30 (s, 3H,  $\text{CH}_3$ ), 3.50 (dd,  $J_1$  = 18.4 Hz,  $J_2$  = 8.8 Hz, 1H, CH), 3.91 (dd,  $J_1$  = 18.4 Hz,  $J_2$  = 3.2 Hz, 1H, CH), 4.10 (dd,  $J_1$  = 18.4 Hz,  $J_2$  = 3.2 Hz, 1H, CH), 6.90-7.05 (m, 2H, ArH), 7.26-7.34 (m, 2H, ArH), 7.73 (t,  $J$  = 8 Hz, 1H, ArH), 8.32-8.47 (m, 2H, ArH), 8.81-8.82 (m, 1H, ArH) ppm;  $^{13}\text{C}$  NMR ( $\text{CDCl}_3$ , 100 MHz)  $\delta$  = 26.5, 40.2, 41.0, 108.3, 122.6, 123.1, 124.2, 127.7, 128.4, 128.6, 130.1, 133.7, 137.5, 144.4, 148.5, 177.3, 195.09 ppm; HRMS (ESI) Calculated for  $\text{C}_{17}\text{H}_{14}^{79}\text{BrNO}_2$  ( $\text{M}+\text{H}$ ) $^+$ : 344.0286 found: 344.0282.

### Synthesis of 1-benzyl-3-[2-(4-bromophenyl)-2-oxoethyl]-1,3-dihydro-2H-indol-2-one (**3l**)<sup>4</sup>

To a solution of 1-benzyl-3-diazo-1,3-dihydro-2H-indol-2-one (**1a**) (100 mg, 0.40 mmol) and (2E)-1-(4-bromophenyl)-3-phenylprop-2-en-1-one (**2i**) (115 mg, 0.40 mmol) in  $\text{CHCl}_3$  (5 mL) was added 10 mol% of  $\text{BF}_3 \cdot \text{OEt}_2$ . The reaction mixture was stirred at 0 °C under an open-air atmosphere to afford **3l** (106 mg, 63%) as a colorless crystalline solid according to general procedure.  $R_f$  = 0.46 (EtOAc/hexane = 1:4, v/v); mp 132-133 °C; IR (neat):  $\nu_{\text{max}}$  2922, 1693, 1609, 1353, 1215, 1104, 735  $\text{cm}^{-1}$ ;  $^1\text{H}$  NMR ( $\text{CDCl}_3$ , 400 MHz)  $\delta$  = 3.44 (dd,  $J_1$  = 18 Hz,  $J_2$  = 8.8 Hz, 1H, CH), 3.85 (dd,  $J_1$  = 18 Hz,  $J_2$  = 3 Hz, 1H, CH), 4.15 (dd,  $J_1$  = 8.4 Hz,  $J_2$  = 2.4 Hz, 1H, CH), 4.97 (s, 2H,  $\text{CH}_2$ ), 6.75 (d,  $J$  = 7.6 Hz, 1H, ArH), 6.96 (t,  $J$  = 7.6 Hz, 1H, ArH), 7.14-7.37 (m, 7H, ArH), 7.62 (d,  $J$  = 8.4 Hz, 2H, ArH), 7.86 (d,  $J$  = 8.8 Hz, 2H, ArH) ppm;  $^{13}\text{C}$  NMR ( $\text{CDCl}_3$ , 100 MHz)  $\delta$  = 40.0, 41.2, 44.0, 109.2, 122.6, 124.3, 127.4, 127.7, 128.1, 128.78, 128.84, 129.7, 132.1, 135.0, 135.9, 143.5, 177.7, 195.9 ppm; HRMS (ESI) Calculated for  $\text{C}_{23}\text{H}_{18}^{79}\text{BrNO}_2$  ( $\text{M}-\text{H}$ ) $^+$ : 418.0448 found: 418.0451.

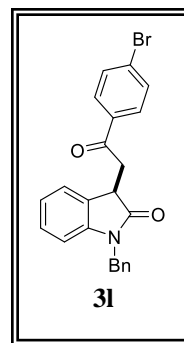

### Synthesis of 1-methyl-3-[2-(4-nitrophenyl)-2-oxoethyl]-1,3-dihydro-2H-indol-2-one (**3m**)

To a solution of 3-diazo-1-methyl-1,3-dihydro-2H-indol-2-one (**1b**) (100 mg, 0.58 mmol) and (2E)-1-(4-nitrophenyl)-3-phenylprop-2-en-1-one (**2j**) (101 mg, 0.58 mmol) in  $\text{CHCl}_3$  (5 mL) was added 10 mol% of  $\text{BF}_3 \cdot \text{OEt}_2$ . The reaction mixture was stirred at 0 °C under an open-air atmosphere to afford **3m** (91 mg, 51%) as a colorless crystalline solid according to general procedure.  $R_f$  = 0.18 (EtOAc/hexane = 1.5:3.5, v/v); mp 131-132 °C; IR (neat):  $\nu_{\text{max}}$  2928, 1696, 1610, 1468, 1347, 1215, 1091, 749  $\text{cm}^{-1}$ ;  $^1\text{H}$  NMR ( $\text{CDCl}_3$ , 400 MHz)  $\delta$  = 3.13 (s, 3H,  $\text{CH}_3$ ), 3.24 (dd,  $J_1$  = 18.4 Hz,  $J_2$  = 8.8 Hz, 1H, CH), 3.62 (dd,  $J_1$  = 18.4 Hz,  $J_2$  = 3.6 Hz, 1H, CH), 3.97 (dd,  $J_1$  = 8.7 Hz,  $J_2$  = 3.4 Hz, 1H, CH), 6.91-6.95 (m, 1H, ArH), 7.17-7.35 (m, 5H, ArH), 7.48-7.50 (m, 1H,

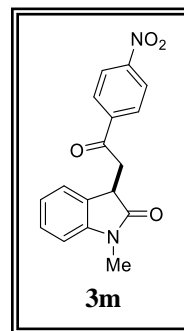

ArH) ppm;  $^{13}\text{C}$  NMR ( $\text{CDCl}_3$ , 100 MHz)  $\delta$  = 26.5, 41.4, 43.7, 108.2, 118.4, 122.6, 124.5, 127.6, 128.3, 128.6, 128.9, 132.0, 133.9, 140.6, 144.3, 177.2, 200.9 ppm; HRMS (ESI) Calculated for  $\text{C}_{17}\text{H}_{14}\text{N}_2\text{O}_4$  ( $\text{M}+\text{H}$ ) $^+$ : 311.1032 found: 311.1043.

### Synthesis of 3-[2-(3-bromo-4-nitrophenyl)-2-oxoethyl]-1-ethyl-1,3-dihydro-2H-indol-2-one (3n)

To a solution of 3-diazo-1-ethyl-1,3-dihydro-2H-indol-2-one (**1c**) (100 mg, 0.53 mmol) and (2E)-1-(3-bromo-4-nitrophenyl)-3-phenylprop-2-en-1-one (**2k**) (176 mg, 0.53 mmol) in  $\text{CHCl}_3$  (5 mL) was added 10 mol% of  $\text{BF}_3\cdot\text{OEt}_2$ . The reaction mixture was stirred at 0 °C under an open-air atmosphere to afford **3n** (71 mg, 33%) as a colorless crystalline solid according to general procedure.  $R_f$  = 0.15 (EtOAc/hexane = 1.5:3.5, v/v); mp 201-202 °C; IR (neat):  $\nu_{\text{max}}$  2929, 1695, 1604, 1535, 1353, 1217, 1029, 738  $\text{cm}^{-1}$ ;  $^1\text{H}$  NMR ( $\text{CDCl}_3$ , 400 MHz)  $\delta$  = 1.32 (t,  $J$  = 7.2 Hz, 3H,  $\text{CH}_3$ ), 3.41 (dd,  $J_1$  = 18.4 Hz,  $J_2$  = 8.4 Hz, 1H, CH), 3.78-3.85 (m, 3H,  $\text{CH}_2/\text{CH}$ ), 4.03 (dd,  $J_1$  = 8.4 Hz,  $J_2$  = 3.2 Hz, 1H, CH), 6.90 (d,  $J$  = 7.6 Hz, 1H, ArH), 7.00 (t,  $J$  = 7.6 Hz, 1H, ArH), 7.21-7.31 (m, 2H, ArH), 7.88 (d,  $J$  = 7.9 Hz, 1H, ArH), 7.98-8.01 (m, 1H, ArH), 8.4 (d,  $J$  = 1.6 Hz, 1H, ArH) ppm;  $^{13}\text{C}$  NMR ( $\text{CDCl}_3$ , 100 MHz)  $\delta$  = 12.6, 35.0, 40.1, 41.0, 108.4, 120.2, 122.5, 124.3, 125.1, 128.4, 128.6, 131.9, 135.8, 136.2, 143.5, 150.1, 176.7, 194.1 ppm; HRMS (ESI) Calculated for  $\text{C}_{18}\text{H}_{15}^{79}\text{BrN}_2\text{O}_4$  ( $\text{M}+\text{H}$ ) $^+$ : 403.0293 found: 403.0285.

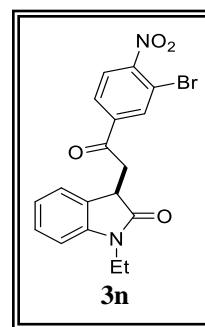

### Synthesis of 1-benzyl-5-methyl-3-(2-oxo-2-phenylethyl)-1,3-dihydro-2H-indol-2-one (3p)<sup>3</sup>

To a solution of 1-benzyl-3-diazo-5-methyl-1,3-dihydro-2H-indol-2-one (**1d**) (100 mg, 0.38 mmol) and (2E)-1,3-diphenylprop-2-en-1-one (**2b**) (176 mg, 0.38 mmol) in  $\text{CHCl}_3$  (5 mL) was added 10 mol% of  $\text{BF}_3\cdot\text{OEt}_2$ . The reaction mixture was stirred at 0 °C under an open-air atmosphere to afford **3p** (100 mg, 74%) as a colorless crystalline solid according to general procedure.  $R_f$  = 0.39 (EtOAc/hexane = 1:4, v/v); mp 161-162 °C; IR (neat):  $\nu_{\text{max}}$  2913, 1698, 1599, 1493, 1445, 1353, 1185, 728  $\text{cm}^{-1}$ ;  $^1\text{H}$  NMR ( $\text{CDCl}_3$ , 400 MHz)  $\delta$  = 2.29 (s, 3H,  $\text{CH}_3$ ), 3.53 (dd,  $J_1$  = 18.2 Hz,  $J_2$  = 9 Hz, 1H, CH), 3.95 (dd,  $J_1$  = 18.2 Hz,  $J_2$  = 3.0 Hz, 1H, CH), 4.20-4.22 (m, 1H, CH), 5.02 (s, 2H,  $\text{CH}_2$ ), 6.68 (d,  $J$  = 8 Hz, 1H, ArH), 7.00 (d,  $J$  = 8 Hz, 1H, ArH), 7.13 (s, 1H, ArH), 7.30-7.65 (m, 8H, ArH), 8.07 (d,  $J$  = 8 Hz, 2H, ArH) ppm;  $^{13}\text{C}$  NMR ( $\text{CDCl}_3$ , 100 MHz)  $\delta$  = 21.1, 40.2, 41.3, 44.0, 108.9, 125.28, 125.33, 127.4,

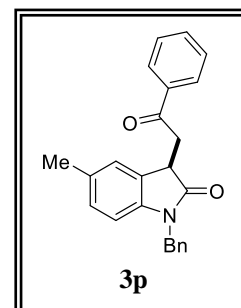



127.6, 128.3, 128.76, 128.82, 129.2, 132.2, 133.5, 136.0, 136.4, 141.0, 177.8, 197.0 ppm; HRMS (ESI) Calculated for C<sub>24</sub>H<sub>21</sub>NO<sub>2</sub> (M+H)<sup>+</sup>: 356.1651 found: 356.1646.

### Synthesis of 1-benzyl-5-methoxy-3-(2-oxo-2-phenylethyl)-1,3-dihydro-2H-indol-2-one (**3q**)

To a solution of 1-benzyl-3-diazo-5-methoxy-1,3-dihydro-2H-indol-2-one (**1e**) (100 mg, 0.36 mmol) and (2E)-1,3-diphenylprop-2-en-1-one (**2b**) (75 mg, 0.36 mmol) in CHCl<sub>3</sub> (5 mL) was added 10 mol% of BF<sub>3</sub>·OEt<sub>2</sub>. The reaction mixture was stirred at 0 °C under an open-air atmosphere to afford **3q** (96 mg, 72%) as a colorless crystalline solid according to general

procedure. R<sub>f</sub> = 0.18 (EtOAc/hexane = 1:4, v/v); mp 173-174 °C; IR (neat): ν<sub>max</sub> 2923, 1701, 1599, 1445, 1363, 1187, 1147, 725 cm<sup>-1</sup>; <sup>1</sup>H NMR (CDCl<sub>3</sub>, 400 MHz) δ = 3.52 (dd, J<sub>1</sub> = 18.2 Hz, J<sub>2</sub> = 9.0 Hz, 1H, CH), 3.74 (s, 3H, CH<sub>3</sub>), 3.94 (dd, J<sub>1</sub> = 18.2 Hz, J<sub>2</sub> = 2.8 Hz, 1H, CH), 4.19-4.21 (m, 1H, CH), 5.00, (s, 2H, CH<sub>2</sub>), 6.66-6.73 (m, 2H, ArH), 6.95 (s, 1H, ArH), 7.30-7.40 (m, 5H, ArH), 7.52 (t, J = 7.6 Hz, 2H, ArH), 7.61-7.65 (m, 1H, ArH), 8.05 (d, J =

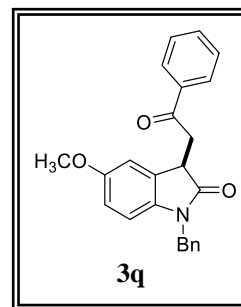

7.2 Hz, 2H, ArH) ppm; <sup>13</sup>C NMR (CDCl<sub>3</sub>, 100 MHz) δ = 40.2, 41.7, 44.1, 55.8, 109.4, 112.0, 112.3, 127.3, 127.6, 128.2, 128.75, 128.82, 130.5, 133.5, 136.0, 136.3, 136.9, 155.9, 177.5, 196.9 ppm; HRMS (ESI) Calculated for C<sub>24</sub>H<sub>21</sub>NO<sub>3</sub> (M+H)<sup>+</sup>: 372.1600 found: 372.1623.

### Synthesis of 3-[2-([1,1'-biphenyl]-4-yl)-2-oxoethyl]-5-chloro-1-benzyl-1,3-dihydro-2H-indol-2-one (**3r**)

To a solution of 1-benzyl-5-chloro-3-diazo-1,3-dihydro-2H-indol-2-one (**1f**) (100 mg, 0.35 mmol) and (2E)-1-([1,1'-biphenyl]-4-yl)-3-phenylprop-2-en-1-one (**2d**) (100 mg, 0.35 mmol) in CHCl<sub>3</sub> (10 mL) was added 10 mol% of BF<sub>3</sub>·OEt<sub>2</sub>. The reaction mixture was stirred at 0 °C under an open-air atmosphere to afford **3r** (108 mg, 68%) as a colorless crystalline

solid according to general procedure. R<sub>f</sub> = 0.26 (EtOAc/hexane = 1.5:3.5, v/v); mp 178-179 °C; IR (neat): ν<sub>max</sub> 2919, 1707, 1681, 1601, 1483, 1352, 1263, 805 cm<sup>-1</sup>; <sup>1</sup>H NMR (CDCl<sub>3</sub>, 400 MHz) δ = 3.49-3.57 (m, 1H, CH), 3.94 (dd, J<sub>1</sub> = 18.4 Hz, J<sub>2</sub> = 2.8 Hz, 1H, CH), 4.15 (d, J = 5.6 Hz, 1H, CH), 4.97 (s, 2H, CH<sub>2</sub>), 6.33-6.65 (m, 1H, ArH), 7.12 (d, J = 6.8 Hz, 1H, ArH),

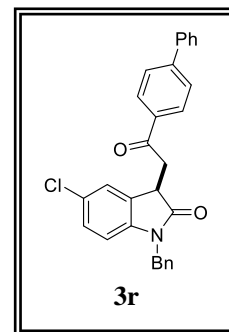

7.25-7.49 (m, 9H, ArH), 7.62-7.71 (m, 4H, ArH), 8.05-8.08 (m, 2H, ArH), ppm; <sup>13</sup>C NMR (CDCl<sub>3</sub>, 100 MHz) δ = 39.9, 41.2, 44.1, 110.0, 124.9, 127.30, 127.33, 127.4, 127.8, 127.95, 128.01, 128.4, 128.8, 128.9, 129.0, 130.8, 134.8, 135.5, 139.8, 142.1, 146.4, 177.3, 196.1 ppm; HRMS (ESI) Calculated for C<sub>29</sub>H<sub>22</sub><sup>35</sup>ClNO<sub>2</sub> (M+Na)<sup>+</sup>: 474.1237 found: 474.1244.

### Synthesis of 1-benzyl-5-bromo-3-(2-oxo-2-phenylethyl)-1,3-dihydro-2H-indol-2-one (3s)

To a solution of 1-benzyl-5-bromo-3-diazo-1,3-dihydro-2H-indol-2-one (**1g**) (100 mg, 0.30 mmol) and (2E)-1,3-diphenylprop-2-en-1-one (**2b**) (56 mg, 0.30 mmol) in CHCl<sub>3</sub> (5 mL) was added 10 mol% of BF<sub>3</sub>·OEt<sub>2</sub>. The reaction mixture was stirred at 0 °C under an open-air atmosphere to afford **3s** (81 mg, 63%) as a colorless crystalline solid according to general procedure. R<sub>f</sub> = 0.46 (EtOAc/hexane = 1:4, v/v); mp 162-163 °C; IR (neat): ν<sub>max</sub> 2917, 1707, 1602, 1483, 1350, 1289, 1217, 690 cm<sup>-1</sup>; <sup>1</sup>H NMR (CDCl<sub>3</sub>, 400 MHz) δ = 3.55 (dd, J<sub>1</sub> = 18.4 Hz, J<sub>2</sub> = 8.8 Hz, 1H, CH), 3.95 (dd, J<sub>1</sub> = 18.4 Hz, J<sub>2</sub> = 2.4 Hz, 1H, CH), 4.18 (d, J = 8 Hz, 1H, CH), 5.00 (s, 2H, CH<sub>2</sub>), 6.64 (d, J = 8.4 Hz, 1H, ArH), 7.30-7.66 (m, 10H, ArH), 8.04 (d, J = 7.6 Hz, 2H, ArH) ppm; <sup>13</sup>C NMR (CDCl<sub>3</sub>, 100 MHz) δ = 39.9, 41.2, 44.1, 110.5, 115.3, 127.3, 127.6, 127.8, 128.3, 128.8, 128.9, 130.9, 131.1, 133.7, 135.4, 136.1, 142.5, 177.2, 196.5 ppm; HRMS (ESI) Calculated for C<sub>23</sub>H<sub>18</sub><sup>79</sup>BrNO<sub>2</sub> (M+Na)<sup>+</sup>: 442.0420 found: 442.0419

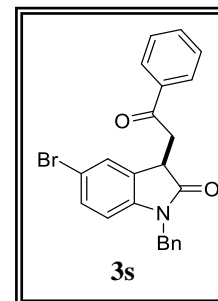

### Synthesis of 5-bromo-1-methyl-3-[2-(4-methylphenyl)-2-oxoethyl]-1,3-dihydro-2H-indol-2-one (3t)

To a solution of 5-bromo-3-diazo-1-methyl-1,3-dihydro-2H-indol-2-one (**1h**) (100mg, 0.40 mmol) and (2E)-1-(4-methylphenyl)-3-phenylprop-2-en-1-one (**2a**) (89 mg, 0.40 mmol) in CHCl<sub>3</sub> (5 mL) was added 10 mol% of BF<sub>3</sub>·OEt<sub>2</sub>. The reaction mixture was stirred at 0 °C under an open-air atmosphere to afford **3t** (93mg, 65%) as a colorless crystalline solid according to general procedure. R<sub>f</sub> = 0.35 (EtOAc/hexane = 1:4, v/v); mp 153-154 °C; IR (neat): ν<sub>max</sub> 2917, 1711, 1606, 1483, 1345, 1098, 806 cm<sup>-1</sup>; <sup>1</sup>H NMR (CDCl<sub>3</sub>, 400 MHz) δ = 2.42 (s, 3H, CH<sub>3</sub>), 3.25 (s, 3H, CH<sub>3</sub>), 3.39 (dd, J<sub>1</sub> = 18.4 Hz, J<sub>2</sub> = 8.8 Hz, 1H, CH), 3.82 (dd, J<sub>1</sub> = 18.3 Hz, J<sub>2</sub> = 2.9 Hz, 1H, CH), 4.03-4.05 (m, 1H, CH), 6.73 (d, J = 8.4 Hz, 1H, ArH), 7.27-7.41 (m, 4H, ArH), 7.87 (d, J = 8.4 Hz, 2H, ArH) ppm; <sup>13</sup>C NMR (CDCl<sub>3</sub>, 100 MHz) δ = 21.7, 26.5, 39.8, 41.2, 109.4, 115.2, 127.7, 128.3, 129.4, 130.9, 131.2, 133.7, 143.4, 144.6, 177.2, 196.2 ppm; HRMS (ESI) Calculated for C<sub>18</sub>H<sub>16</sub><sup>79</sup>BrNO<sub>2</sub> (M+H)<sup>+</sup>: 358.0443 found: 358.0437.

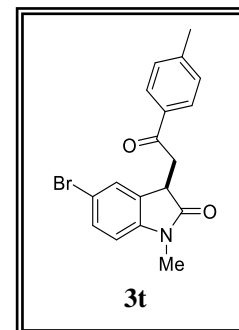

### Synthesis of 1-benzyl-5-bromo-3-[2-(4-bromophenyl)-2-oxoethyl]-1,3-dihydro-2H-indol-2-one (3u)

To a solution of 1-benzyl-5-bromo-3-diazo-1,3-dihydro-2*H*-indol-2-one (**1g**) (100 mg, 0.30 mmol) and (2*E*)-1-(4-bromophenyl)-3-phenylprop-2-en-1-one (**2i**) (137 mg, 0.30 mmol) in CHCl<sub>3</sub> (5 mL) was added 10 mol% of BF<sub>3</sub>·OEt<sub>2</sub>. The reaction mixture was stirred at 0 °C under an open-air atmosphere to afford **3u** (76mg, 51%) as a colorless crystalline solid according to general procedure. R<sub>f</sub> = 0.54 (EtOAc/hexane = 1:4, v/v); mp 148-149 °C; IR (neat): ν<sub>max</sub> 2920, 1710, 1586, 1482, 1348, 1169, 809 cm<sup>-1</sup>; <sup>1</sup>H NMR (CDCl<sub>3</sub>, 400 MHz) δ = 3.39 (dd, *J*<sub>1</sub> = 18.4 Hz, *J*<sub>2</sub> = 8.4 Hz, 1H, CH), 3.77 (dd, *J*<sub>1</sub> = 18.4 Hz, *J*<sub>2</sub> = 3.2 Hz, 1H, CH), 4.00-4.02 (m, 1H, CH), 4.87 (ABq, Δ*δ*<sub>AB</sub> = 0.02, *J* = 15.8 Hz, 2H, CH<sub>2</sub>), 6.51 (d, *J* = 8.4 Hz, 1H, ArH), 7.16-7.28 (m, 7H, ArH), 7.54 (d, *J* = 8.4 Hz, 2H, ArH), 7.77 (d, *J* = 8.4 Hz, 2H, ArH) ppm; <sup>13</sup>C NMR (CDCl<sub>3</sub>, 100 MHz) δ = 39.8, 41.2, 44.1, 110.6, 115.4, 127.3, 127.5, 127.8, 128.9, 129.0, 129.7, 130.9, 131.0, 132.1, 134.8, 135.4, 142.5, 177.0, 195.5 ppm; HRMS (ESI) Calculated for C<sub>23</sub>H<sub>17</sub><sup>79</sup>Br<sup>81</sup>BrNO<sub>2</sub> (M+H)<sup>+</sup>: 499.9684 found: 499.9683

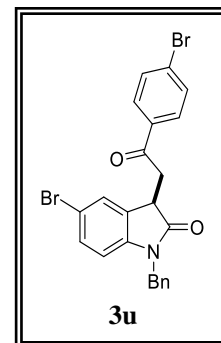

### Synthesis of 5-bromo-3-[2-(3,4-dimethoxyphenyl)-2-oxoethyl]-1-benzyl-1,3-dihydro-2*H*-indol-2-one (**3v**)

To a solution of 1-benzyl-5-bromo-3-diazo-1,3-dihydro-2*H*-indol-2-one (**1g**) (100 mg, 0.30 mmol) and (2*E*)-1-(3,4-dimethoxyphenyl)-3-phenylprop-2-en-1-one (**2l**) (137 mg, 0.30 mmol) in CHCl<sub>3</sub> (5 mL) was added 10 mol% of BF<sub>3</sub>·OEt<sub>2</sub>. The reaction mixture was stirred at 0 °C under an open-air atmosphere to afford **3v** (86mg, 60%) as a colorless amorphous solid according to general procedure. R<sub>f</sub> = 0.11 (EtOAc/hexane = 1.5:3.5, v/v); mp 123-124 °C; IR (neat): ν<sub>max</sub> 2943, 1710, 1670, 1487, 1343, 1273, 730 cm<sup>-1</sup>; <sup>1</sup>H NMR (CDCl<sub>3</sub>, 400 MHz) δ = 3.64 (dd, *J*<sub>1</sub> = 19 Hz, *J*<sub>2</sub> = 8.1 Hz, 1H, CH), 3.83 (s, 3H, CH<sub>3</sub>), 3.92-3.98 (m, 4H, CH<sub>3</sub>/CH), 4.11 (dd, *J*<sub>1</sub> = 7.6 Hz, *J*<sub>2</sub> = 2.8 Hz, 1H, CH), 5.00 (ABq, Δ*δ*<sub>AB</sub> = 0.08, *J* = 15.7 Hz, 2H, CH<sub>2</sub>), 6.62 (d, *J* = 8 Hz, 1H, ArH), 6.96 (d, *J* = 8.8 Hz, 1H, ArH), 7.09-7.12 (m, 1H, ArH), 7.28-7.42 (m, 8H, ArH) ppm; <sup>13</sup>C NMR (CDCl<sub>3</sub>, 100 MHz) δ = 41.8, 44.0, 44.8, 55.86, 55.92, 110.4, 113.2, 113.8, 115.2, 121.4, 126.7, 127.3, 127.7, 128.9, 130.6, 131.5, 135.6, 142.6, 153.5, 153.8, 177.5, 197.5 ppm; HRMS (ESI) Calculated for C<sub>25</sub>H<sub>22</sub><sup>79</sup>BrNO<sub>4</sub> (M+H)<sup>+</sup>: 480.0810 found: 480.0805.

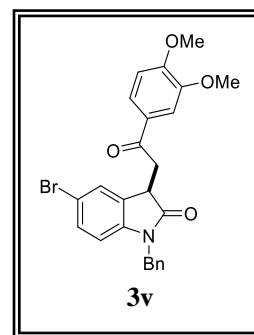

### Synthesis of 1-benzyl-5-iodo-3-(2-oxo-2-phenylethyl)-1,3-dihydro-2*H*-indol-2-one (**3w**)

To a solution of 1-benzyl-3-diazo-5-iodo-1,3-dihydro-2*H*-indol-2-one (**1i**) (100 mg, 0.27 mmol) and (*2E*)-1,3-diphenylprop-2-en-1-one (**2b**) (56 mg, 0.27 mmol) in CHCl<sub>3</sub> (5 mL) was added 10 mol% of BF<sub>3</sub>·OEt<sub>2</sub>. The reaction mixture was stirred at 0 °C under an open-air atmosphere to afford **3w** (74 mg, 59%) as a colorless crystalline solid according to general procedure. R<sub>f</sub> = 0.43 (EtOAc/hexane = 1:4, v/v); mp 196-197 °C; IR (neat): ν<sub>max</sub> 2918, 1705, 1598, 1483, 1351, 1215, 1175, 690 cm<sup>-1</sup>; <sup>1</sup>H NMR (CDCl<sub>3</sub>, 400 MHz) δ = 3.56 (dd, *J*<sub>1</sub> = 18.4 Hz, *J*<sub>2</sub> = 8.4 Hz, 1H, CH), 3.94 (dd, *J*<sub>1</sub> = 18.4 Hz, *J*<sub>2</sub> = 2.8 Hz, 1H, CH), 4.15-4.17 (m, 1H, CH), 5.00 (s, 2H, CH<sub>2</sub>), 6.55 (d, *J* = 8 Hz, 1H, ArH), 7.30-7.67 (m, 10H, ArH), 8.04 (d, *J* = 7.6 Hz, 2H, ArH) ppm; <sup>13</sup>C NMR (CDCl<sub>3</sub>, 100 MHz) δ = 39.9, 41.0, 44.0, 85.3, 111.1, 127.3, 127.8, 128.3, 128.8, 128.9, 131.5, 133.1, 133.7, 135.5, 136.1, 136.9, 143.3, 177.0, 196.4 ppm; HRMS (ESI) Calculated for C<sub>23</sub>H<sub>18</sub>INO<sub>2</sub> (M+H)<sup>+</sup>: 468.0460 found: 468.0464.

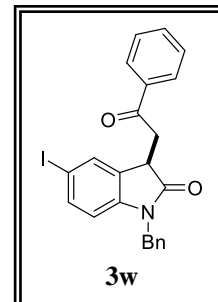

#### Synthesis of 1-benzyl-3-[2-(naphthalen-1-yl)-2-oxoethyl]-1,3-dihydro-2*H*-indol-2-one (**3x**)

To a solution of 1-benzyl-3-diazo-1,3-dihydro-2*H*-indol-2-one (**1a**) (100 mg, 0.40 mmol) and (*2E*)-1-(naphthalen-1-yl)-3-phenylprop-2-en-1-one (**2m**) (163 mg, 0.40 mmol) in CHCl<sub>3</sub> (5 mL) was added 10 mol% of BF<sub>3</sub>·OEt<sub>2</sub>. The reaction mixture was stirred at 0 °C under an open-air atmosphere to afford **3x** (110 mg, 70%) as a colorless crystalline solid according to general procedure. R<sub>f</sub> = 0.44 (EtOAc/hexane = 1.5:3.5, v/v); mp 161-162 °C; IR (neat): ν<sub>max</sub> 2919, 1703, 1608, 1355, 1217, 1170, 746 cm<sup>-1</sup>; <sup>1</sup>H NMR (CDCl<sub>3</sub>, 400 MHz) δ = 3.53 (dd, *J*<sub>1</sub> = 18 Hz, *J*<sub>2</sub> = 8.8 Hz, 1H, CH), 3.92-3.98 (m, 1H, CH), 4.24 (dd, *J*<sub>1</sub> = 8.8 Hz, *J*<sub>2</sub> = 2.8 Hz, 1H, CH), 5.03 (s, 2H, CH<sub>2</sub>), 6.79 (d, *J* = 7.6 Hz, 1H, ArH), 7.00 (t, *J* = 7.6 Hz, 1H, ArH), 7.20 (t, *J* = 7.6 Hz, 1H, ArH), 7.29-7.65 (m, 11H, ArH), 8.04-8.06 (m, 2H, ArH), ppm; <sup>13</sup>C NMR (CDCl<sub>3</sub>, 100 MHz) δ = 40.1, 41.3, 44.0, 109.1, 122.6, 124.4, 127.4, 127.6, 128.0, 128.2, 128.75, 128.84, 129.1, 133.5, 135.9, 136.4, 143.5, 177.9, 196.9 ppm; HRMS (ESI) Calculated for C<sub>27</sub>H<sub>21</sub>NO<sub>2</sub> (M+H)<sup>+</sup>: 392.1651 found: 392.1653.

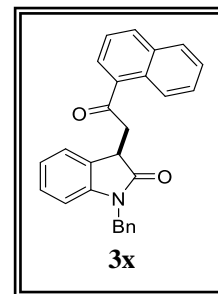

#### Synthesis of 1-ethyl-3-[2-(naphthalen-2-yl)-2-oxoethyl]-1,3-dihydro-2*H*-indol-2-one (**3y**)

To a solution of 3-diazo-1-ethyl-1,3-dihydro-2*H*-indol-2-one (**1c**) (100 mg, 0.53 mmol) and (*2E*)-1-(naphthalen-2-yl)-3-phenylprop-2-en-1-one (**2n**) (137 mg, 0.53 mmol) in CHCl<sub>3</sub> (5 mL) was added 10 mol% of BF<sub>3</sub>·OEt<sub>2</sub>. The reaction mixture was stirred at 0 °C under an open-air atmosphere to afford **3y** (113mg, 65%) as a colorless amorphous solid according to general

procedure.  $R_f = 0.39$  (EtOAc/hexane = 1:4, v/v); mp 111-112 °C; IR (neat):  $\nu_{\max}$  2978, 1699, 1609, 1462, 1358, 1227, 1133, 739  $\text{cm}^{-1}$ ;  $^1\text{H}$  NMR ( $\text{CDCl}_3$ , 400 MHz)  $\delta = 1.27$  (t,  $J = 7.2$  Hz, 3H, CH), 3.48 (dd,  $J_1 = 17.9$  Hz,  $J_2 = 8.7$  Hz, 1H, CH), 3.75-3.88 (m, 3H, CH/CH<sub>2</sub>), 4.13 (dd,  $J_1 = 8.4$  Hz,  $J_2 = 3.2$  Hz, 1H, CH), 6.84 (d,  $J = 7.6$  Hz, 1H, ArH), 7.00 (t,  $J = 7.6$  Hz, 1H, ArH), 7.24-7.59 (m, 5H, ArH), 7.83-7.96 (m, 3H, ArH), 8.61 (d,  $J = 8.4$  Hz, 1H, ArH) ppm;  $^{13}\text{C}$  NMR ( $\text{CDCl}_3$ , 100 MHz)  $\delta = 12.7, 34.9, 41.8, 43.1, 108.3, 122.4, 124.4, 124.5, 125.8, 126.6, 128.07, 128.12, 128.2, 128.5, 129.3, 130.1, 133.1, 134.0, 135.1, 143.5, 177.2, 201.0$  ppm; HRMS (ESI) Calculated for  $\text{C}_{22}\text{H}_{19}\text{NO}_2$  ( $\text{M}+\text{H}$ )<sup>+</sup>: 330.1494 found: 330.1486.

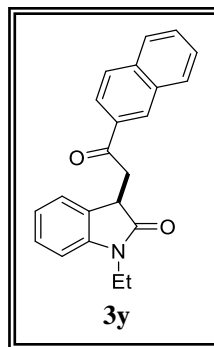

### Synthesis of 3-[2-(anthracen-9-yl)-2-oxoethyl]-1-ethyl-1,3-dihydro-2H-indol-2-one (**3z**)

To a solution of 3-diazo-1-ethyl-1,3-dihydro-2H-indol-2-one (**1c**) (100 mg, 0.53 mmol) and (2E)-1-(anthracen-9-yl)-3-phenylprop-2-en-1-one (**2o**) (163 mg, 0.53 mmol) in  $\text{CHCl}_3$  (5 mL) was added 10 mol% of  $\text{BF}_3 \cdot \text{OEt}_2$ . The reaction mixture was stirred at 0 °C under an open-air atmosphere to afford **3z** (106 mg, 53%) as a colorless amorphous solid according to general procedure.  $R_f = 0.41$  (EtOAc/hexane = 1.5:3.5, v/v); mp 121-122 °C; IR (neat):  $\nu_{\max}$  2979, 1702, 1609, 1462, 1366, 1273, 737  $\text{cm}^{-1}$ ;  $^1\text{H}$  NMR ( $\text{CDCl}_3$ , 400 MHz)  $\delta = 1.34$ , (t,  $J = 7.2$  Hz, 3H, CH<sub>3</sub>), 3.66 (dd,  $J_1 = 19.6$  Hz,  $J_2 = 7.4$  Hz, 1H, CH), 3.77-3.96 (m, 3H, CH/CH<sub>2</sub>) 4.07 (dd,  $J_1 = 7.2$  Hz,  $J_2 = 3.2$  Hz, 1H, CH), 6.95 (d,  $J = 7.6$  Hz, 1H, ArH), 7.16 (t,  $J = 7.6$  Hz, 1H, ArH), 7.36 (t,  $J = 7.6$  Hz, 1H, ArH), 7.44-7.53 (m, 5H, ArH), 7.78-7.80 (m, 2H, ArH), 7.98-8.01 (m, 2H, ArH), 8.46 (s, 1H, ArH) ppm;  $^{13}\text{C}$  NMR ( $\text{CDCl}_3$ , 100 MHz)  $\delta = 12.5, 35.0, 41.3, 46.7, 108.5, 122.30, 122.33, 124.1, 124.2, 125.6, 126.98, 127.03, 128.3, 128.8, 129.0, 131.0, 134.9, 144.0, 177.0, 207.0$  ppm; HRMS (ESI) Calculated for  $\text{C}_{26}\text{H}_{21}\text{NO}_2$  ( $\text{M}+\text{H}$ )<sup>+</sup>: 380.1651 found: 380.1629.

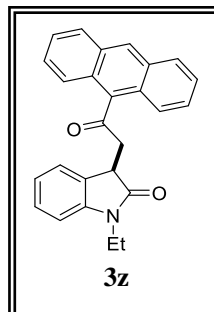

### Synthesis of methyl 2-(4-methylbenzoyl)-1,3-diphenylcyclopropane-1-carboxylate (**3aa**)<sup>6</sup>

To a solution of methyl 2-diazo-2-phenylacetate (**1k**) (100 mg, 0.57 mmol) and (2E)-1-(4-methylphenyl)-3-phenylprop-2-en-1-one (**2a**) (126 mg, 0.57 mmol) in  $\text{CHCl}_3$  (5 mL) was added 10 mol% of  $\text{BF}_3 \cdot \text{OEt}_2$ . The reaction mixture was stirred at 0 °C under an open-air atmosphere to afford **6a** (44 mg, 21%) as a colorless amorphous solid according to general procedure.  $R_f = 0.8$  (EtOAc/hexane = 0.5:4.5, v/v); mp 157-158 °C; IR (neat):  $\nu_{\max}$  2951, 1715,

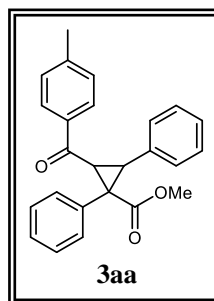

1670, 1445, 1263, 1180, 716  $\text{cm}^{-1}$ ;  $^1\text{H}$  NMR ( $\text{CDCl}_3$ , 400 MHz)  $\delta$  = 2.49 (s, 3H,  $\text{CH}_3$ ), 3.46 (s, 3H,  $\text{CH}_3$ ), 4.03 (d,  $J$  = 7.2 Hz, 1H, CH), 4.45 (d,  $J$  = 7.2 Hz, 1H, CH), 7.29-7.43 (m, 12H, ArH), 8.06 (d,  $J$  = 8 Hz, 2H, ArH) ppm;  $^{13}\text{C}$  NMR ( $\text{CDCl}_3$ , 100 MHz)  $\delta$  = 21.8, 35.2, 35.4, 48.7, 52.7, 127.3, 127.9, 128.3, 128.4, 128.6, 128.8, 129.5, 130.1, 134.8, 135.3, 135.5, 144.2, 170.0, 193.5 ppm; HRMS (ESI) Calculated for  $\text{C}_{25}\text{H}_{23}\text{O}_3$  ( $\text{M}+\text{H}$ ) $^+$ : 371.1647 found: 371.1607.

### Synthesis of 3,3'-(((butane-1,4-diylbis(oxy))bis(2,1-phenylene))bis(2-oxoethane-2,1-diyl))bis(1-benzylindolin-2-one) (**6a**)

To a solution of 1-benzyl-3-diazo-1,3-dihydro-2*H*-indol-2-one (**1a**) (100 mg, 0.40 mmol) and (2*E*,2'*E*)-1,1'-((butane-1,4-diylbis(oxy))bis(2,1-phenylene))bis(3-phenylprop-2-en-1-one) (**5a**) (101 mg, 0.20 mmol) in  $\text{CHCl}_3$  (5 mL) was added 10 mol% of  $\text{BF}_3\cdot\text{OEt}_2$ . The reaction mixture was stirred at 0  $^\circ\text{C}$  under an open-air atmosphere to afford **6a** (182

mg, 59%) as a colorless crystalline solid according to general procedure.  $R_f$  = 0.28 (EtOAc/hexane = 1.5:3.5, v/v); mp 187-188  $^\circ\text{C}$ ; IR (neat):  $\nu_{\text{max}}$  2927, 1707, 1672, 1599, 1454, 1356, 1291, 1236, 753  $\text{cm}^{-1}$ ;  $^1\text{H}$  NMR ( $\text{CDCl}_3$ , 400 MHz)  $\delta$  = 1.73 (s, 1H, CH), 2.31-2.34 (m, 1H, CH), 3.44 (dd,  $J_1$  = 18.4 Hz,  $J_2$  = 9.2 Hz, 1H, CH), 3.90 (dd,  $J_1$  = 18.4 Hz,  $J_2$  = 3.2 Hz, 1H, CH), 4.12-4.28 (m, 3H,  $\text{CH}_2$ ), 4.86-4.92 (m, 2H,  $\text{CH}_2$ ), 6.69 (d,  $J$  = 7.6 Hz, 1H, ArH), 6.88-6.99 (m, 3H, ArH), 7.08-7.13 (m, 1H, ArH), 7.22-7.42 (m, 7H, ArH), 7.75 (d,  $J$  = 7.6 Hz, 1H, ArH) ppm;  $^{13}\text{C}$  NMR ( $\text{CDCl}_3$ , 100 MHz)  $\delta$  = 29.2, 41.7,

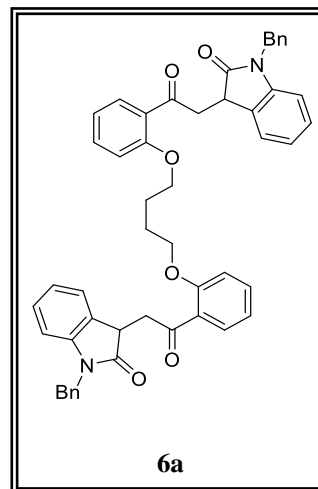

43.9, 45.3, 65.1, 109.0, 112.6, 121.0, 122.5, 124.4, 127.3, 127.5, 127.6, 127.9, 128.8, 129.3, 130.5, 134.1, 136.0, 143.4, 157.9, 177.9, 198.7 ppm (due to the  $\text{C}_2$  Symmetry we observed half-half the signal); HRMS (ESI) Calculated for  $\text{C}_{50}\text{H}_{44}\text{N}_2\text{O}_6$  ( $\text{M}+\text{K}$ ) $^+$ : 807.2863 found: 807.2852.

### Synthesis of (((hexane-1,6-diylbis(oxy))bis(2,1-phenylene))bis(2-oxoethane-2,1-diyl))bis(1-benzylindolin-2-one) (**6b**)

To a solution of 1-benzyl-3-diazo-1,3-dihydro-2*H*-indol-2-one (**1a**) (100 mg, 0.40 mmol) and (2*E*,2'*E*)-1,1'-((hexane-1,6-diylbis(oxy))bis(2,1-phenylene))bis(3-phenylprop-2-en-1-one) (**5b**) (106 mg, 0.2 mmol) in  $\text{CHCl}_3$  (5 mL) was added 10 mol% of  $\text{BF}_3\cdot\text{OEt}_2$ . The reaction mixture was stirred at 0  $^\circ\text{C}$  under an open-air atmosphere to afford **6b** (179 mg, 56%) as a colorless crystalline solid according to general procedure.  $R_f$  = 0.30 (EtOAc/hexane = 1.5:3.5, v/v); mp

210-211 °C; IR (neat):  $\nu_{\max}$  2931, 1709, 1671, 1602, 1457, 1356, 753  $\text{cm}^{-1}$ ;  $^1\text{H}$  NMR ( $\text{CDCl}_3$ , 400 MHz)  $\delta$  = 1.50 (s, 2H,  $\text{CH}_2$ ), 1.83 (s, 2H,  $\text{CH}_2$ ), 3.54-3.60 (m, 1H,  $\text{CH}_2$ ), 3.90-3.60 (m, 4H,  $\text{CH}_2$ ), 4.88-5.02 (m, 2H,  $\text{CH}_2$ ), 6.69-6.71 (m, 1H, ArH), 6.92-6.99 (m, 3H, ArH), 7.09-7.13 (m, 1H, ArH), 7.21-7.30 (m, 6H, ArH), 7.41-7.45 (m, 1H, ArH), 7.77 (d,  $J$  = 7.6 Hz, 1H, ArH) ppm;  $^{13}\text{C}$  NMR ( $\text{CDCl}_3$ , 100 MHz)  $\delta$  = 26.1, 29.1, 42.0, 44.0, 45.3, 68.5, 109.1, 112.4, 120.6, 122.6, 124.3, 127.2, 127.6, 127.8, 128.8, 129.6, 130.4, 130.7, 134.1, 135.8, 143.3, 158.6, 178.4, 198.5 ppm (due to the  $\text{C}_2$  Symmetry we observed half-half the signal); HRMS (ESI) Calculated for  $\text{C}_{52}\text{H}_{48}\text{N}_2\text{O}_6$  ( $\text{M}+\text{H}$ ) $^+$ : 797.3591 found: 797.3588.

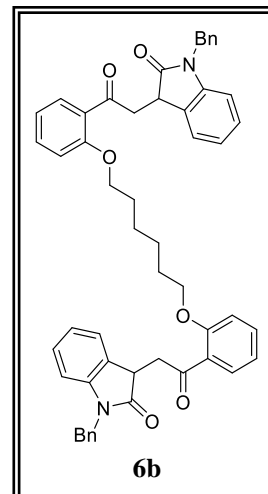

### Synthesis of 2-benzoyl-3-(4-chlorophenyl)-1'-ethylspiro[cyclopropane-1,3'-indol]-2'(1'H)-one (**7a**)

To a solution of  $\text{InCl}_3$  (20 mol%) in 6:2 mL water and THF were added 1-benzyl-3-diazo-1,3-dihydro-2H-indol-2-one (**1a**) (100 mg, 0.40 mmol) and (2E)-1-(4-chlorophenyl)-3-phenylprop-2-en-1-one (**2g**) (97 mg, 0.40 mmol) under an air atmosphere. The reaction mixture was stirred at ambient temperature for 24 h and extracted with ethyl acetate. The organic phase was dried over  $\text{Na}_2\text{SO}_4$  and concentrated *in vacuo*. The residue was purified by chromatographic purification (Hexane/EtOAc) to afford the desired cyclopropane product **7a** (154 mg, 83%) as a colorless crystalline solid.  $R_f$  = 0.31 (EtOAc/hexane = 1:4, v/v); mp 225-226 °C; IR (neat):  $\nu_{\max}$  3057, 1708, 1673, 1606, 1357, 1179, 1091, 739  $\text{cm}^{-1}$ ;  $^1\text{H}$  NMR ( $\text{CDCl}_3$ , 400 MHz)  $\delta$  = 4.13 (d,  $J$  = 8 Hz, 1H, CH), 4.31 (d,  $J$  = 8.4 Hz, 1H, CH), 4.93 (ABq,  $\Delta\delta_{AB}$  = 0.06,  $J$  = 15.6 Hz, 2H,  $\text{CH}_2$ ), 6.76 (d,  $J$  = 7.6 Hz, 1H, ArH), 6.94 (t,  $J$  = 7.6 Hz, 1H, ArH), 7.11 (t,  $J$  = 7.6 Hz, 1H, ArH), 7.21-7.41 (m, 12H, ArH), 7.51-7.55 (m, 1H, ArH), 7.93 (d,  $J$  = 7.6 Hz, 1H, ArH) ppm;  $^{13}\text{C}$  NMR ( $\text{CDCl}_3$ , 100 MHz)  $\delta$  = 38.6, 41.4, 44.1, 109.2, 122.0, 122.6, 125.7, 127.3, 127.7, 128.4, 128.5, 128.8, 128.9, 130.7, 131.9, 133.5, 133.9, 136.0, 136.9, 142.9, 172.0, 192.7 ppm; HRMS (ESI) Calculated for  $\text{C}_{30}\text{H}_{22}^{35}\text{ClNO}_2$  ( $\text{M}+\text{H}$ ) $^+$ : 464.1417 found: 464.1412.

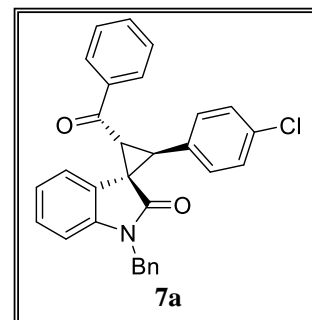

### Synthesis of 2-benzoyl-3-(4-chlorophenyl)-1'-methylspiro[cyclopropane-1,3'-indol]-2'(1'H)-one (**7b**)

To a solution of 1-benzyl-3-diazo-1,3-dihydro-2*H*-indol-2-one (**1a**) (100 mg, 0.40 mmol) and dimethyl phosphite (40  $\mu$ L, 0.44 mmol) in 2.0 mL THF was added to a flame-dried round bottom flask equipped with a magnetic stirring bar under argon. The solution was cooled to -30  $^{\circ}$ C and 0.5 M KHMDS in toluene (110  $\mu$ L, 0.48 mmol, 1.2 equiv) was added dropwise, after additional 10 min, a solution of (2*E*)-1-(4-chlorophenyl)-3-phenylprop-2-en-1-one (**2g**) (97 mg, 0.40 mmol) in 1.0 mL THF was added dropwise. The reaction was allowed to proceed at the same temperature and was monitored by TLC. Once the  $\alpha,\beta$ -unsaturated ketone was fully consumed the reaction mixture was quenched with saturated aqueous ammonium chloride. After being warmed to ambient temperature, the mixture was extracted with ethyl acetate. The organic phase was dried over Na<sub>2</sub>SO<sub>4</sub> and concentrated *in vacuo*. The residue was purified by chromatographic purification (Hexane/EtOAc) to afford the desired cyclopropane product **7b** (132 mg, 71%) as a colorless crystalline solid.

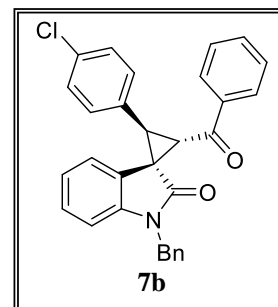

*R<sub>f</sub>* = 0.31 (EtOAc/hexane = 1:4, v/v); mp 196-197  $^{\circ}$ C; IR (neat):  $\nu_{\max}$  2922, 1706, 1605, 1459, 1353, 1175, 741  $\text{cm}^{-1}$ ; <sup>1</sup>H NMR (CDCl<sub>3</sub>, 400 MHz)  $\delta$  = 3.67 (d, *J* = 8.4 Hz, 1H, CH), 4.22 (d, *J* = 8.0 Hz, 1H, CH), 4.59 (d, *J* = 15.6 Hz, 1H, CH), 5.19 (d, *J* = 15.6 Hz, 1H, CH), 6.18 (d, *J* = 7.6 Hz, 1H, ArH), 6.79-6.85 (m, 2H, ArH), 7.02 (d, *J* = 6.8 Hz, 1H, ArH), 7.02-7.39 (m, 11H, ArH), 7.78 (d, *J* = 8.4 Hz, 2H, ArH) ppm; <sup>13</sup>C NMR (CDCl<sub>3</sub>, 100 MHz)  $\delta$  = 37.5, 39.3, 41.7, 44.0, 109.3, 121.3, 122.1, 125.2, 127.3, 127.7, 127.8, 128.0, 128.7, 129.2, 129.8, 129.9, 133.5, 134.8, 135.8, 139.9, 143.2, 172.5, 190.7 ppm; HRMS (ESI) Calculated for C<sub>30</sub>H<sub>22</sub><sup>35</sup>ClNO<sub>2</sub> (M+H)<sup>+</sup>: 464.1417 found: 464.1410.

### Synthesis of 3-methoxy-1-methyl-1,3-dihydro-2*H*-indol-2-one (**8**)<sup>7</sup>

To a solution of 3-diazo-1-methyl-1,3-dihydro-2*H*-indol-2-one (**1b**) (100 mg, 0.58 mmol), (2*E*)-1-(4-methylphenyl)-3-phenylprop-2-en-1-one (**2a**) (90 mg, 0.58 mmol) and methanol (23  $\mu$ L, 0.58 mmol) in CHCl<sub>3</sub> (5 mL) was added 10 mol% of BF<sub>3</sub>·OEt<sub>2</sub>. The reaction mixture was stirred at 0  $^{\circ}$ C temperature to afford product **8** (88 mg, 86%) as a light yellow amorphous solid. *R<sub>f</sub>* = 0.46 (EtOAc/hexane = 1.5:3.5, v/v); mp 131-132  $^{\circ}$ C; IR (neat):  $\nu_{\max}$  2927, 1705, 1612, 1467, 1350, 1019, 752  $\text{cm}^{-1}$ ; <sup>1</sup>H NMR (CDCl<sub>3</sub>, 400 MHz)  $\delta$  = 3.19 (s, 3H, CH<sub>3</sub>), 3.52 (s, 3H, CH<sub>3</sub>), 4.86 (s, 1H, CH), 6.82 (d, *J* = 7.8 Hz, 1H, ArH), 7.10 (t, *J* = 7.6 Hz, 1H, ArH), 7.32-7.36 (m, 1H, ArH), 7.38-7.42 (m, 1H,

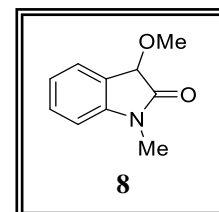



ArH) ppm;  $^{13}\text{C}$  NMR ( $\text{CDCl}_3$ , 100 MHz)  $\delta$  = 26.0, 56.1, 76.7, 108.4, 122.9, 125.3, 130.0 144.3, 174.3 ppm.

**Table 2.** Optimization of reaction conditions of spiro-indolooxiranes **10a**

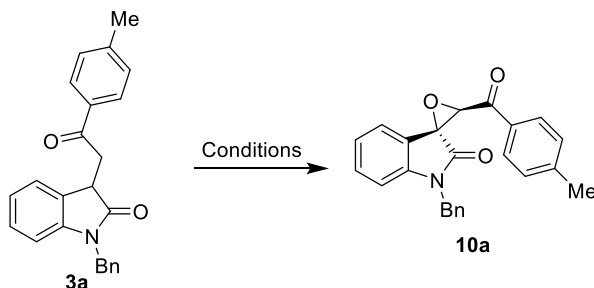

| Entry           | Catalyst          | Base        | Solvent        | Temp. ( $^{\circ}\text{C}$ ) | Yield <sup>b</sup> % |
|-----------------|-------------------|-------------|----------------|------------------------------|----------------------|
| 1               | NiBr <sub>2</sub> | TEA         | PhMe           | rt                           | 35                   |
| 2               | FeCl <sub>3</sub> | TEA         | PhMe           | rt                           | 22                   |
| 3               | CuCl <sub>2</sub> | TEA         | PhMe           | rt                           | 30                   |
| 4               | CuBr              | TEA         | PhMe           | rt                           | 46                   |
| 5               | CuI               | TEA         | PhMe           | rt                           | 61                   |
| 6               | CuI               | DBU         | PhMe           | rt                           | 20                   |
| 7               | CuI               | DMAP        | PhMe           | rt                           | 68                   |
| 8               | CuI               | DABCO       | PhMe           | rt                           | nr <sup>c</sup>      |
| 9               | CuI               | DMAP        | THF            | rt                           | 39                   |
| 10              | CuI               | DMAP        | DMF            | rt                           | 15                   |
| <b>11</b>       | <b>CuI</b>        | <b>DMAP</b> | <b>Acetone</b> | <b>rt</b>                    | <b>91</b>            |
| 12              | CuI               | DMAP        | DCM            | rt                           | nr <sup>c</sup>      |
| 13              | CuI               | DMAP        | Acetone        | 50                           | 44                   |
| 14 <sup>d</sup> | CuI               | DMAP        | Acetone        | rt                           | nr <sup>c</sup>      |

<sup>a</sup>Reaction conditions: 10 mol% catalyst, **3a** (0.13 mmol, 1.0 equiv.), base (0.13 mmol, 1.0 equiv.), solvent (4.0 mL), at room temperature, for 15 h under an open air atmosphere. <sup>b</sup>Isolated yield. <sup>c</sup>The reaction was conducted at 50  $^{\circ}\text{C}$ . <sup>d</sup>The reaction carried out under argon atmosphere.

Further to develop the synthesis of spiro-indolooxiranes, the required 3-alkylated oxindole **3a** was synthesized from diazoamide. The reaction of 3-alkylated oxindole **3a** was initially studied with triethylamine (TEA) in the presence of various catalysts, solvents and the results were summarized in Table 2. Our initial investigation began with the epoxide formation of 3-alkylated oxindole **3a** dissolved in 4 mL of toluene at room temperature for 13 hours in the presence of 10 mol% of NiBr<sub>2</sub> and 1.0 equiv. of trimethylamine the desired spiro-indolooxirane **10a** was isolated in 35% yield (Table 2, entry 1). Moreover, FeCl<sub>3</sub> didn't improve the yield of product **10a** (Table 2, entry 2). In order to optimize the reaction conditions, various copper catalysts, such as

CuCl<sub>2</sub>, CuBr, or CuI, were examined; however, CuI enhanced the yield of product **10a** (Table 2, entry 5). Then optimize various bases such as 1,8-diazabicyclo[5.4.0]undec-7-ene (DBU), 4-Dimethylaminopyridine (DMAP), and 1,4-diazabicyclo[2.2.2]octane (DABCO). Among the bases screening indicated that DMAP was optimal to give spiro-indolooxirane **10a** in 68% yield (Table 2, entry 7). Successively, the screening of solvents (Table 2, entries 9–12) revealed that acetone was the optimum choice in terms of isolated yield of product **10a**. The above reaction was carried out at 50 °C afforded product **10a** in 44% yield (Table 2, entry 13).

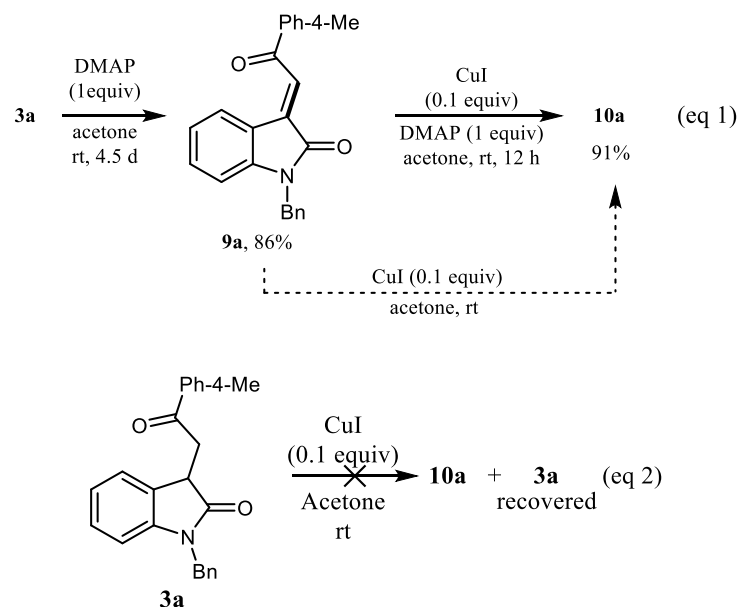

### Scheme 8. Control experiments for **10a**

The reaction was carried out under argon atmosphere however, the desired product **10a** was not formed (Table 2, entry 13). Thus, the optimized reaction conditions for the formation of product **10a** were found to be 10 mol% of CuI and DMAP in acetone at room temperature, as indicated in Table 2, entry 11.

To understand the reaction mechanism of this epoxidation transformation, few control experiments were performed. When the reaction was carried out with 3-alkylated oxindole **3a** at room temperature in the presence of DMAP, the formation of oxindole-derived  $\alpha,\beta$ -unsaturated enamide **9a** was successfully isolated in 86% yield. The oxindole-derived  $\alpha,\beta$ -unsaturated enamide **9a** was converted into spiro-indolooxirane **10a** (Scheme 8, eq 1). Similarly, the reaction was carried out with CuI didn't give the desired product **10a**, but the subsequent addition of 1

equiv of DMAP delivered the desired product **10a** (Scheme 8, eq 2). In order to study mechanistic pathway for the reaction, we examined the reaction between 3-alkylated oxindole **3a** (1 equiv) and CuI (0.1 equiv) in the presence of 2,2,6,6-tetramethyl-1-piperidinyloxy (TEMPO) did not afford the desired product **10a**. This suggests a radical pathway for this transformation.

A plausible mechanism for the formation of spiro-indolooxiranes **10** from 3-alkylated oxindoles **3** is depicted in Scheme 9. Under mild basic conditions, the protons at the CH<sub>α</sub> and CH<sub>β</sub> position of **3** is amenable for oxidation to provide the intermediate **A**. Copper-bound dioxygen is able to activate superoxide to insert into the α,β-unsaturated enamide **B** to form 2-oxyindolenylperoxy radical intermediate **C**, which triggers the O-O bond cleavage reaction leading to spiro-indolooxiranes **10**.

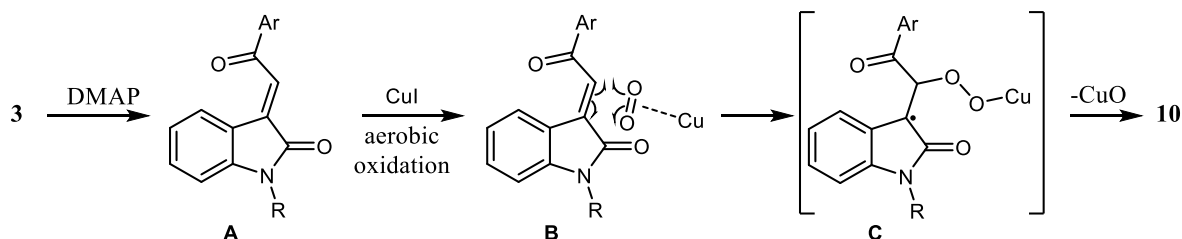

**Scheme 9.** Plausible reaction mechanism for **10**.

### General experimental procedure for the synthesis of spiro-indolooxiranes **10**

A mixture of DMAP (1.0 equiv) and copper iodide (0.1 equiv) in 4 mL acetone was stirred at room temperature for 5 minutes. Then, 3-alkylated oxindole **3** (1.0 equiv) was added to the reaction mixture and stirred for 15-24 h. The mixture was then quenched with water and extracted with ethyl acetate (3×10 mL). The concentration of the combined organic layers under reduced pressure afforded the crude product, which was purified by column chromatography using silica gel to afford the corresponding product **10**.

### Synthesis of (3*E*)-1-benzyl-3-[2-(4-methylphenyl)-2-oxoethylidene]-1,3-dihydro-2*H*-indol-2-one (**9a**)

To a solution of DMAP (0.14 mmol) in acetone (4 mL) was added 1-benzyl-3-[2-(4-methylphenyl)-2-oxoethyl]-1,3-dihydro-2*H*-indol-2-one (**3a**) (50 mg, 0.14 mmol) the reaction mixture was stirred at room temperature to afford **9a** (42 mg, 86%) as a colorless amorphous solid according to general procedure.

R<sub>f</sub> = 0.46 (EtOAc/hexane = 1:4, v/v); mp 141-142 °C; IR (neat): ν<sub>max</sub> 2922, 1701, 1659, 1596,

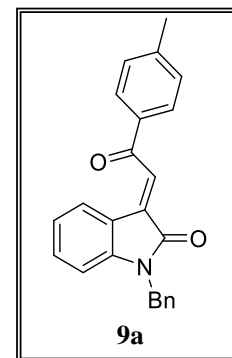

1482, 1345, 1228, 692  $\text{cm}^{-1}$ ;  $^1\text{H}$  NMR ( $\text{CDCl}_3$ , 400 MHz)  $\delta$  = 2.33 (s, 3H,  $\text{CH}_3$ ), 5.00 (s, 2H,  $\text{CH}_2$ ), 6.64 (d,  $J$  = 8 Hz, 1H, ArH), 7.11 (d,  $J$  = 8 Hz, 1H, ArH), 7.30-7.37 (m, 6H, ArH), 7.57-7.61 (m, 2H, ArH), 7.67-6.68 (m, 1H, ArH), 7.98 (s, 1H, ArH), 8.16-8.19 (m, 3H, ArH) ppm;  $^{13}\text{C}$  NMR ( $\text{CDCl}_3$ , 100 MHz)  $\delta$  = 21.1, 44.0, 109.03, 120.3, 126.4, 127.3, 127.7, 128.3, 128.85, 128.92, 132.4, 133.0, 133.8, 135.6, 136.8, 137.7, 143.0, 168.2, 191.3 ppm; HRMS (ESI) Calculated for  $\text{C}_{24}\text{H}_{19}\text{NO}_2$  ( $\text{M}+\text{H}$ ) $^+$ : 354.1494 found: 354.1504.

### Synthesis of 1-benzyl-3'-(4-methylbenzoyl)spiro[indole-3,2'-oxiran]-2(1H)-one (**10a**)

To a solution of DMAP (17 mg, 0.14 mmol) and copper iodide (3 mg, 0.014 mmol) in acetone (4 mL) was added 1-benzyl-3-[2-(4-methylphenyl)-2-oxoethyl]-1,3-dihydro-2H-indol-2-one (**3a**) (50 mg, 0.14 mmol) the reaction mixture was stirred at room temperature to afford **10a** (49 mg, 95%) as a colorless crystalline solid according to general procedure.  $R_f$  = 0.35 (EtOAc/hexane = 1:4, v/v); mp 198-199-174  $^\circ\text{C}$ ; IR (neat):  $\nu_{\text{max}}$  2923, 1701, 1599, 1445, 1363, 1187, 1147, 725  $\text{cm}^{-1}$ ;  $^1\text{H}$  NMR ( $\text{CDCl}_3$ , 400 MHz)  $\delta$  = 2.40 (s, 3H,  $\text{CH}_3$ ), 5.02 (d,  $J$  = 4.4 Hz, 3H,  $\text{NCH}_2/\text{OCH}$ ), 6.77 (d,  $J$  = 8 Hz, 1H, ArH), 6.92 (t,  $J$  = 7.6 Hz, 1H, ArH), 7.12 (d,  $J$  = 7.6 Hz, 1H, ArH), 7.19-7.37 (m, 10H, ArH), 7.85 (d,  $J$  = 8.4 Hz, 2H, ArH) ppm;  $^{13}\text{C}$  NMR ( $\text{CDCl}_3$ , 100 MHz)  $\delta$  = 21.9, 44.5, 60.9, 64.0, 110.0, 119.4, 123.3, 124.5, 127.3, 128.0, 128.5, 129.0, 129.7, 130.9, 132.7, 135.1, 144.5, 145.7, 170.5, 190.2 ppm; HRMS (ESI) Calculated for  $\text{C}_{24}\text{H}_{19}\text{NO}_3$  ( $\text{M}+\text{H}$ ) $^+$ : 370.1443 found: 370.1437.

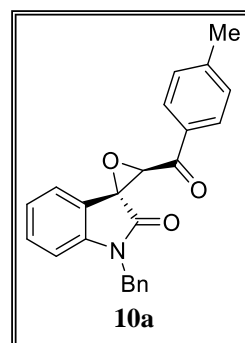

### Synthesis of 3'-benzoyl-1-benzyl-5-methoxyspiro[indole-3,2'-oxiran]-2(1H)-one (**10b**)

To a solution of DMAP (16 mg, 0.13 mmol) and copper iodide (3 mg, 0.013 mmol) in acetone (4 mL) was added 1-benzyl-3-diazonio-5-methoxy-2-oxo-2,3-dihydro-1H-indol-3-ide (**3q**) (50 mg, 0.13 mmol) the reaction mixture was stirred at room temperature to afford **10b** (47 mg, 91%) as a colorless amorphous solid according to general procedure.  $R_f$  = 0.23 (EtOAc/hexane = 1:4, v/v); mp 148-149  $^\circ\text{C}$ ; IR (neat):  $\nu_{\text{max}}$  2923, 1701, 1599, 1445, 1363, 1187, 1147, 725  $\text{cm}^{-1}$ ;  $^1\text{H}$  NMR ( $\text{CDCl}_3$ , 400 MHz)  $\delta$  = 3.57 (s, 3H,  $\text{CH}_3$ ), 4.91 (s, 2H,  $\text{CH}_2$ ), 4.97 (s, 1H, CH), 6.59-6.67 (m, 3H, ArH), 7.19-7.56 (m, 8H, ArH), 7.88 (d,  $J$  = 7.6 Hz, 2H, ArH) ppm;  $^{13}\text{C}$  NMR ( $\text{CDCl}_3$ , 100 MHz)  $\delta$  = 44.6, 55.7, 61.2, 64.01, 110.7, 110.8, 116.4, 120.4, 127.3, 128.0, 128.4, 129.0, 129.1, 134.5, 135.15, 135.19,

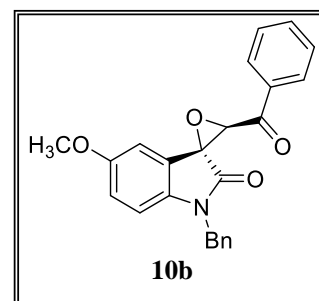

137.7, 156.2, 170.2, 190.70 ppm; HRMS (ESI) Calculated for  $C_{24}H_{19}NO_4$  ( $M+H$ )<sup>+</sup>: 386.1392 found: 386.1386.

### Synthesis of 3'-([1,1'-biphenyl]-4-carbonyl)-1-benzylspiro[indole-3,2'-oxiran]-2(1H)-one (10c)

To a solution of DMAP (15 mg, 0.12 mmol) and copper iodide (3 mg, 0.012 mmol) in acetone (4 mL) was added 3-[2-([1,1'-biphenyl]-4-yl)-2-oxoethyl]-1-benzyl-1,3-dihydro-2H-indol-2-one (3f) (50 mg, 0.12 mmol) the reaction mixture was stirred at room temperature to afford 10c (45 mg, 87%) as a colorless crystalline solid according to general procedure.  $R_f$

= 0.37 (EtOAc/hexane = 1:4, v/v); mp 210-211 °C; IR (neat):  $\nu_{max}$  2923, 1701, 1599, 1445, 1363, 1187, 1147, 725  $cm^{-1}$ ;  $^1H$  NMR ( $CDCl_3$ , 400 MHz)  $\delta$  = 5.07 (s, 2H,  $CH_2$ ), 5.12 (s, 1H, CH), 6.96 (d,  $J$  = 0.8 Hz, 1H, ArH), 6.98-7.00 (m, 1H, ArH), 7.19-7.21 (m, 1H, ArH), 7.25-7.29 (m, 1H, ArH), 7.33-7.53 (m, 7H, ArH), 7.63-7.74 (m, 5H, ArH), 8.07 (d,  $J$  = 8.4 Hz, 2H, ArH) ppm;  $^{13}C$  NMR ( $CDCl_3$ , 100 MHz)  $\delta$  = 44.5, 61.0, 64.1, 110.0, 119.4, 123.3,

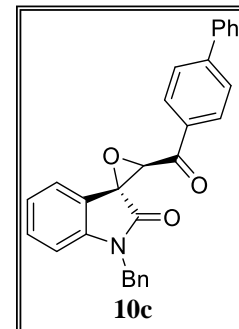

124.6, 127.3, 127.4, 127.6, 128.0, 128.6, 129.0, 129.1, 131.0, 133.8, 135.1, 139.4, 144.6, 147.3, 170.5, 190.2 ppm; HRMS (ESI) Calculated for  $C_{29}H_{21}NO_3$  ( $M+Na$ )<sup>+</sup>: 454.1419 found: 454.1414.

### Synthesis of 3'-(2-bromobenzoyl)-1-methylspiro[indole-3,2'-oxiran]-2(1H)-one (10d)

To a solution of DMAP (18 mg, 0.16 mmol) and copper iodide (3 mg, 0.016 mmol) in acetone (4 mL) was added 3-[2-(2-bromophenyl)-2-oxoethyl]-1-methyl-1,3-dihydro-2H-indol-2-one (3k) (50 mg, 0.16 mmol) the reaction mixture was stirred at room temperature to afford 10d (42 mg, 79%) as a colorless crystalline solid according to general procedure.  $R_f$  = 0.31 (EtOAc/hexane = 1:4, v/v); mp 167-169 °C; IR (neat):  $\nu_{max}$  2923, 1701, 1599, 1445, 1363, 1187, 1147, 725  $cm^{-1}$ ;  $^1H$  NMR ( $CDCl_3$ , 400 MHz)  $\delta$  = 3.22 (s, 3H,  $CH_3$ ), 4.81 (s, 1H, CH), 6.81-6.85 (m, 1H, ArH), 6.96 (t,  $J$  = 7.6 Hz, 1H, ArH), 7.24-7.34 (m, 4H, ArH),

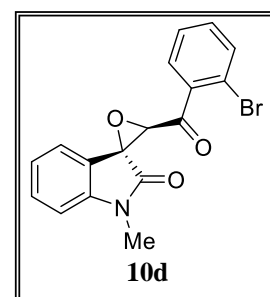

7.48-7.53 (m, 2H, ArH) ppm;  $^{13}C$  NMR ( $CDCl_3$ , 100 MHz)  $\delta$  = 26.9, 62.7, 65.4, 109.0, 119.3, 120.5, 123.3, 124.8, 127.9, 131.0, 131.2, 133.7, 134.2, 137.8, 145.5, 170.1, 193.2 ppm; HRMS (ESI) Calculated for  $C_{17}H_{12}^{79}BrNO_3$  ( $M+H$ )<sup>+</sup>: 358.0079 found: 358.0083.

### Synthesis of 1-ethyl-3'-(naphthalene-2-carbonyl)spiro[indole-3,2'-oxiran]-2(1H)-one (10e)

To a solution of DMAP (18 mg, 0.15 mmol) and copper iodide (3 mg, 0.015 mmol) in acetone (4 mL) was added 1-ethyl-3-[2-(naphthalen-2-yl)-2-oxoethyl]-1,3-dihydro-2H-indol-2-one (3y) (50 mg, 0.15 mmol) the reaction mixture was stirred at room temperature to afford 10e (44 mg, 85%)

as a colorless amorphous solid according to general procedure.  $R_f = 0.38$  (EtOAc/hexane = 1:4, v/v); mp 135-136 °C; IR (neat):  $\nu_{\max}$  2923, 1701, 1599, 1445, 1363, 1187, 1147, 725  $\text{cm}^{-1}$ ;  $^1\text{H}$  NMR ( $\text{CDCl}_3$ , 400 MHz)  $\delta = 1.40$  (t,  $J = 7.2$  Hz, 3H,  $\text{CH}_3$ ), 3.82-3.98 (m, 2H,  $\text{CH}_2$ ), 4.99 (s, 1H, CH), 6.95-6.99 (m, 2H, ArH), 7.26-8.10 (m, 8H, ArH) ppm;  $^{13}\text{C}$  NMR ( $\text{CDCl}_3$ , 100 MHz)  $\delta = 12.8, 35.6, 61.6, 65.0, 109.2, 119.6, 123.1, 124.4, 124.8, 125.5, 127.0, 128.7, 129.0, 130.1, 130.3, 131.1, 131.9, 134.0, 134.8, 144.6, 169.9, 193.2$  ppm; HRMS (ESI) Calculated for  $\text{C}_{22}\text{H}_{17}\text{NO}_3$  ( $\text{M}+\text{H}$ ) $^+$ : 344.1287 found: 344.1286.

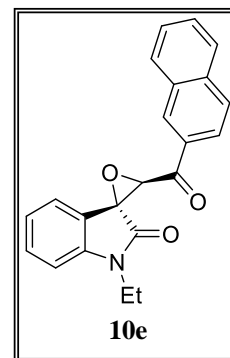

### General experimental procedure for the synthesis of 11

A mixture of 3-alkylated oxindoles **3** (4.0 mmol) in dry MeOH (15 mL) was added  $\text{NaBH}_4$  (8.0 mmol) slowly at 0 °C under nitrogen atmosphere. The reaction mixture was allowed to stir for 5 hours at room temperature and the solvent was evaporated. The mixture was then quenched with water and extracted with ethyl acetate (3×10 mL). The concentration of the combined organic layers under reduced pressure afforded the crude product, which was purified by column chromatography using silica gel to afford the corresponding product **11**.

### Synthesis of 3-[2-([1,1'-biphenyl]-4-yl)-2-hydroxyethyl]-1-benzyl-1,3-dihydro-2H-indol-2-one (**11a**)

To the stirred solution of 3-[2-([1,1'-biphenyl]-4-yl)-2-oxoethyl]-1-benzyl-1,3-dihydro-2H-indol-2-one (**3f**) (50 mg, 0.12 mmol) in dry MeOH (40 mL) was added  $\text{NaBH}_4$  (14 mg, 0.36 mmol) slowly at 0 °C under nitrogen atmosphere. The reaction mixture was allowed to stir for 2 hours at 0 °C to afford corresponding alcohol **11a** (47 mg, 95%) as a colorless crystalline solid.  $R_f = 0.15$  (EtOAc/hexane = 1.5:3.5, v/v); mp 171-172 °C; IR (neat):  $\nu_{\max}$  3380, 2991, 1689, 1610, 1485, 1359, 1070, 739  $\text{cm}^{-1}$ ;  $^1\text{H}$  NMR ( $\text{CDCl}_3$ , 400 MHz)  $\delta = 2.17$ -2.29 (m, 2H,  $\text{CH}_2$ ), 2.44-2.50 (m, 1H, CH), 3.63-3.77 (m, 1H, CH), 4.83-4.85 (m, 2H,  $\text{CH}_2$ ), 5.14-5.17 (m, 1H, CH), 6.64-6.68 (m, 1H, ArH), 6.91-6.98 (m, 1H, ArH), 7.05-7.12 (m, 1H, ArH), 7.17-7.28 (m, 6H, ArH), 7.35 (t,  $J = 7.6$  Hz, 2H, ArH), 7.44-7.52 (m, 6H, ArH) ppm;  $^{13}\text{C}$  NMR ( $\text{CDCl}_3$ , 100 MHz)  $\delta = 39.3, 40.7, 42.6, 43.96, 43.98, 45.1, 71.1, 73.5, 109.3, 109.4, 122.8, 122.9, 123.7, 124.0, 126.1, 126.5, 127.11, 127.14, 127.25, 127.31, 127.37, 127.39, 127.7, 127.8, 128.0, 128.2, 128.8, 128.9, 130.0, 135.6, 135.7, 140.3, 140.6, 140.9, 141.0, 143.0, 143.2, 143.3, 143.5, 179.2$  ppm; HRMS (ESI) Calculated for  $\text{C}_{29}\text{H}_{25}\text{NO}_2$  ( $\text{M}+\text{Na}$ ) $^+$ : 442.1783 found: 442.1783.

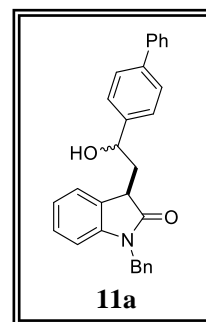

### Synthesis of 1-benzyl-3-[2-(4-bromophenyl)-2-hydroxyethyl]-1,3-dihydro-2H-indol-2-one (**11b**)

To the stirred solution of 1-benzyl-3-[2-(4-bromophenyl)-2-oxoethyl]-1,3-dihydro-2H-indol-2-one (**3l**) (50 mg, 0.12 mmol) in dry MeOH (40 mL) was added NaBH<sub>4</sub> (14 mg, 0.36 mmol) slowly at 0 °C under nitrogen atmosphere. The reaction mixture was allowed to stir for 5 hours at room temperature to afford corresponding alcohol **11b** (44 mg, 89%) as a colorless crystalline solid. R<sub>f</sub> = 0.12 (EtOAc/hexane = 1.5:3.5 v/v); mp 167-168 °C; IR (neat): ν<sub>max</sub> 3401, 2923, 1691, 1611, 1485, 1364, 1071, 749 cm<sup>-1</sup>; <sup>1</sup>H NMR (CDCl<sub>3</sub>, 400 MHz) δ = 2.16-2.34 (m, 2H, CH), 2.47-2.54 (m, 1H, CH), 3.70 (dd, J<sub>1</sub> = 9.6 Hz, J<sub>2</sub> = 3.6 Hz, 1H, CH), 3.84 (dd, J<sub>1</sub> = 9.2 Hz, J<sub>2</sub> = 4.8 Hz, 1H, CH), 4.32 (d, J = 6.4 Hz, 1H, CH), 4.95-5.01 (m, 2H, CH<sub>2</sub>), 5.20 (d, J = 6.8 Hz, 1H, CH), 6.77-6.81 (m, 1H, ArH), 7.04-7.39 (m, 10H, ArH), 7.51-7.54 (m, 2H, ArH), ppm; <sup>13</sup>C NMR (CDCl<sub>3</sub>, 100 MHz) δ = 39.1, 40.7, 42.4, 43.97, 44.0145.2, 7.07, 73.3, 109.4, 109.5, 121.1, 121.3, 122.9, 123.0, 123.6, 123.9, 127.4, 127.5, 127.76, 127.84, 128.1, 128.3, 128.6, 128.8, 128.87, 128.92, 131.5, 131.6, 135.5, 135.6, 142.9, 143.17, 143.22, 143.5, 179.1, 179.2 ppm; HRMS (ESI) Calculated for C<sub>23</sub>H<sub>20</sub><sup>81</sup>BrNO<sub>2</sub> (M+H)<sup>+</sup>: 424.0735 found: 424.0764.

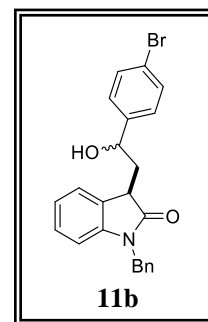

### Synthesis of 3-tert-butoxy-1-benzyl-3-[2-(4-methylphenyl)-2-oxoethyl]-1,3-dihydro-2H-indol-2-one (**12**)

To a solution of FeCl<sub>3</sub> (7 mg, 0.04 mmol) and TBHP (55 μL, 0.56 mmol) in acetonitrile (2 mL) was added 1-benzyl-3-[2-(4-methylphenyl)-2-oxoethyl]-1,3-dihydro-2H-indol-2-one (**3a**) (50 mg, 0.14 mmol) and the reaction mixture was stirred at room temperature to afford **12** (41 mg, 69%) as a colorless liquid according to general procedure. R<sub>f</sub> = 0.38 (EtOAc/hexane = 1:4, v/v); IR (neat): ν<sub>max</sub> 2923, 1730, 1684, 1611, 1465, 1358, 1181, 1007, 701 cm<sup>-1</sup>; <sup>1</sup>H NMR (CDCl<sub>3</sub>, 400 MHz) δ = 1.04 (s, 9H, C(CH<sub>3</sub>)<sub>3</sub>), 2.32 (s, 3H, CH<sub>3</sub>), 3.71-3.91 (m, 2H, CH<sub>2</sub>), 4.66 (d, J = 16 Hz, 1H, NCH), 5.26 (d, J = 16 Hz, 1H, NCH), 6.55 (d, J = 8 Hz, 1H, ArH), 6.85-6.89 (m, 1H, ArH), 7.07-7.33 (m, 10H, ArH), 7.73 (d, J = 8.4 Hz, 2H, ArH) ppm; <sup>13</sup>C NMR (CDCl<sub>3</sub>, 100 MHz) δ = 21.7, 26.4, 42.5, 43.9, 80.7, 82.4, 109.2, 122.0, 124.1, 127.1, 128.3, 128.6, 129.2, 129.7, 134.0, 135.9, 144.3, 144.5, 174.0, 194.2 ppm; HRMS (ESI) Calculated for C<sub>28</sub>H<sub>29</sub>NO<sub>3</sub> (M+H)<sup>+</sup>: 444.2175 found: 444.2168.

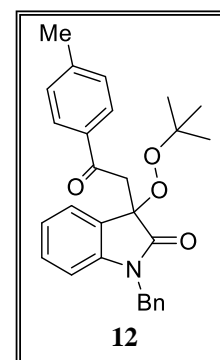

### Synthesis of 1-benzyl-3-hydroxy-3-[2-(4-methylphenyl)-2-oxoethyl]-1,3-dihydro-2H-indol-2-one (**13**)

To a solution of 3-tert-butoxy-1-benzyl-3-[2-(4-methylphenyl)-2-oxoethyl]-1,3-dihydro-2H-indol-2-one (**12**) (30 mg, 0.07 mmol) in acetonitrile (5 mL) was stirred at reflux conditions for 6 hours to afford **13** (14 mg, 52%) as a colorless crystalline solid.  $R_f = 0.13$  (EtOAc/hexane = 1.5:3.5, v/v); mp 161-162 °C; IR (neat):  $\nu_{\max}$  3364, 3059, 1680, 1608, 1349, 1174, 1000, 733  $\text{cm}^{-1}$ ;  $^1\text{H}$  NMR ( $\text{CDCl}_3$ , 400 MHz)  $\delta = 2.44$  (s, 3H,  $\text{CH}_3$ ), 3.63 (d,  $J = 17.2$  Hz, 1H of  $\text{CH}_2$ ), 3.91 (d,  $J = 17.2$  Hz, 1H of  $\text{CH}_2$ ), 4.98 (ABq,  $\Delta\delta_{AB} = 0.06$ ,  $J = 15.6$  Hz, 2H,  $\text{CH}_2$ ), 6.76 (d,  $J = 7.2$  Hz, 1H, ArH), 7.01-7.04 (m, 1H, ArH), 7.20-7.45 (m, 9H, ArH), 7.84 (d,  $J = 7.6$  Hz, 2H, ArH) ppm;  $^{13}\text{C}$  NMR ( $\text{CDCl}_3$ , 100 MHz)  $\delta = 21.7, 44.0, 44.5, 74.6, 109.7, 123.1, 124.0, 127.3, 127.7, 128.4, 128.9, 129.4, 129.8, 130.2, 134.0, 135.6, 142.9, 144.8, 176.7, 197.8$  ppm; HRMS (ESI) Calculated for  $\text{C}_{24}\text{H}_{21}\text{NO}_3$  ( $\text{M}+\text{H}$ ) $^+$ : 372.1600 found: 372.1604.

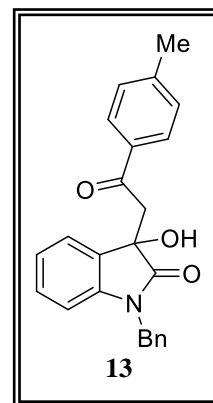



## NMR-Titration experiments

The  $^{13}\text{C}$  NMR titration experiments were performed to investigate the interactions of chalcone **2a** with  $\text{BF}_3 \cdot \text{OEt}_2$  and the results revealed the presence of binding (Figure S1).

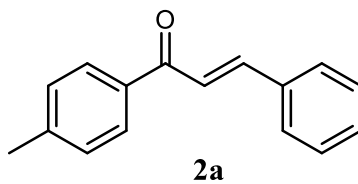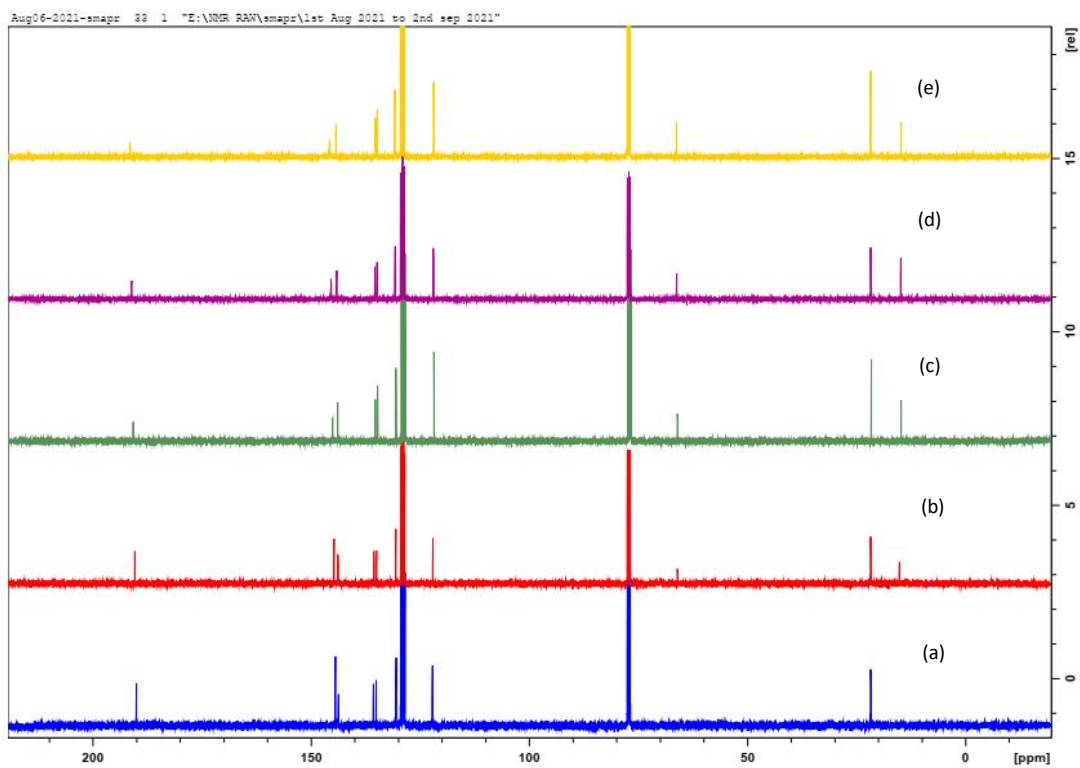

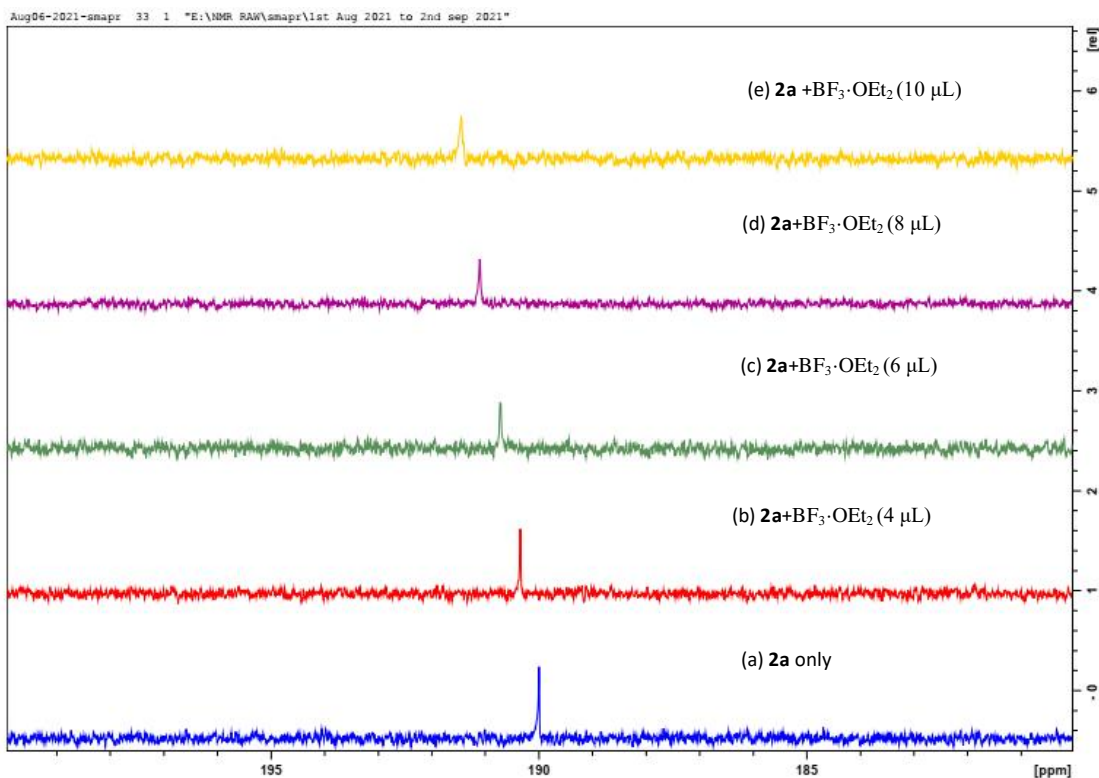

**Figure S1.** <sup>13</sup>C-NMR spectra of chalcone **2a** signals in CDCl<sub>3</sub>

- (a) Chalcone **2a** only.
- (b) Chalcone **2a** (20 mg) with BF<sub>3</sub>·OEt<sub>2</sub> (4 μL)
- (c) Chalcone **2a** (20 mg) with BF<sub>3</sub>·OEt<sub>2</sub> (6 μL)
- (d) Chalcone **2a** (20 mg) with BF<sub>3</sub>·OEt<sub>2</sub> (8 μL)
- (e) Chalcone **2a** (20 mg) with BF<sub>3</sub>·OEt<sub>2</sub> (10 μL)

Next, the <sup>1</sup>H NMR experiments were performed at different time interval to follow the reaction between diazoamide **1a** and chalcone **2a** in the presence of BF<sub>3</sub>·OEt<sub>2</sub> to afford product **3a** with the by-product of benzoic acid determined using D<sub>2</sub>O exchange experiment as shown in Figure S2.

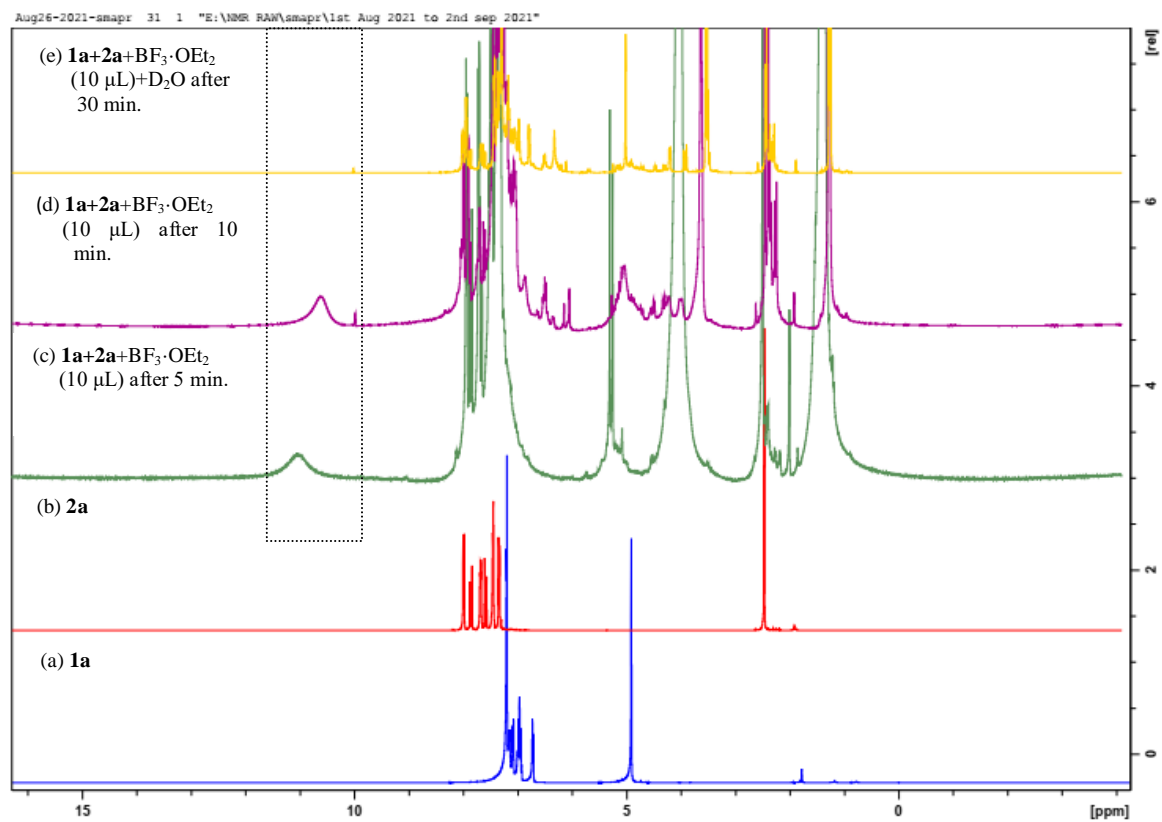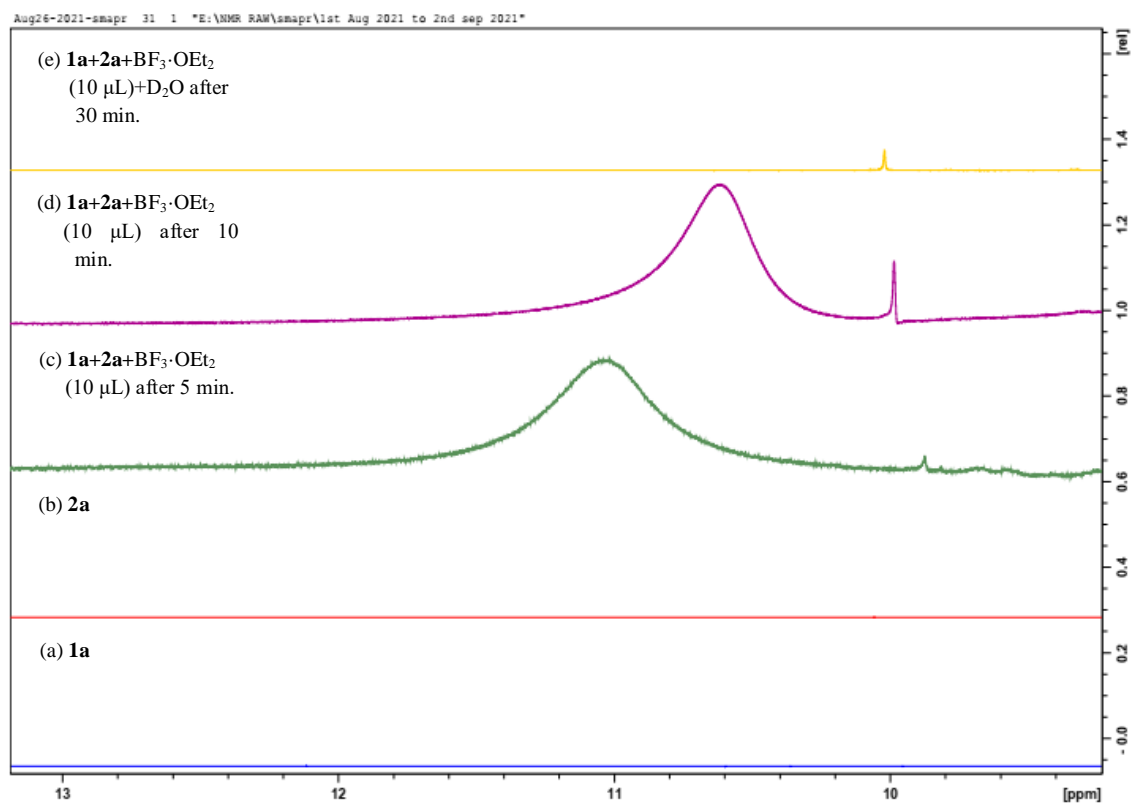

Figure S2. <sup>1</sup>H-NMR spectra of reaction mixture **3a** signals in CDCl<sub>3</sub>

- (a) Diazoamide **1a** (10 mg).
- (b) Chalcone **2a** (10 mg).
- (c) A mixture of diazoamide **1a** (10 mg), chalcone **2a** (10 mg) with  $\text{BF}_3 \cdot \text{OEt}_2$  (10  $\mu\text{L}$ ) after 5 minutes.
- (d) A mixture of diazoamide **1a** (10 mg), chalcone **2a** (10 mg) with  $\text{BF}_3 \cdot \text{OEt}_2$  (10  $\mu\text{L}$ ) after 10 minutes.
- (e) A mixture of diazoamide **1a** (10 mg), chalcone **2a** (10 mg) with  $\text{BF}_3 \cdot \text{OEt}_2$  (10  $\mu\text{L}$ ) and 1 drop of  $\text{D}_2\text{O}$  after 30 minutes.

In order to determine the presence of benzoic acid as a byproduct during the formation of product **3a**, NMR experiments at different time interval were recorded between benzaldehyde and  $\text{BF}_3 \cdot \text{OEt}_2$  in  $\text{CDCl}_3$  as shown in Figure S3. The disappearance of aldehyde at 10.20 ppm with the appearance of benzoic acid as a broad singlet at 11.32 ppm were observed and confirmed with  $\text{D}_2\text{O}$  exchange experiments.

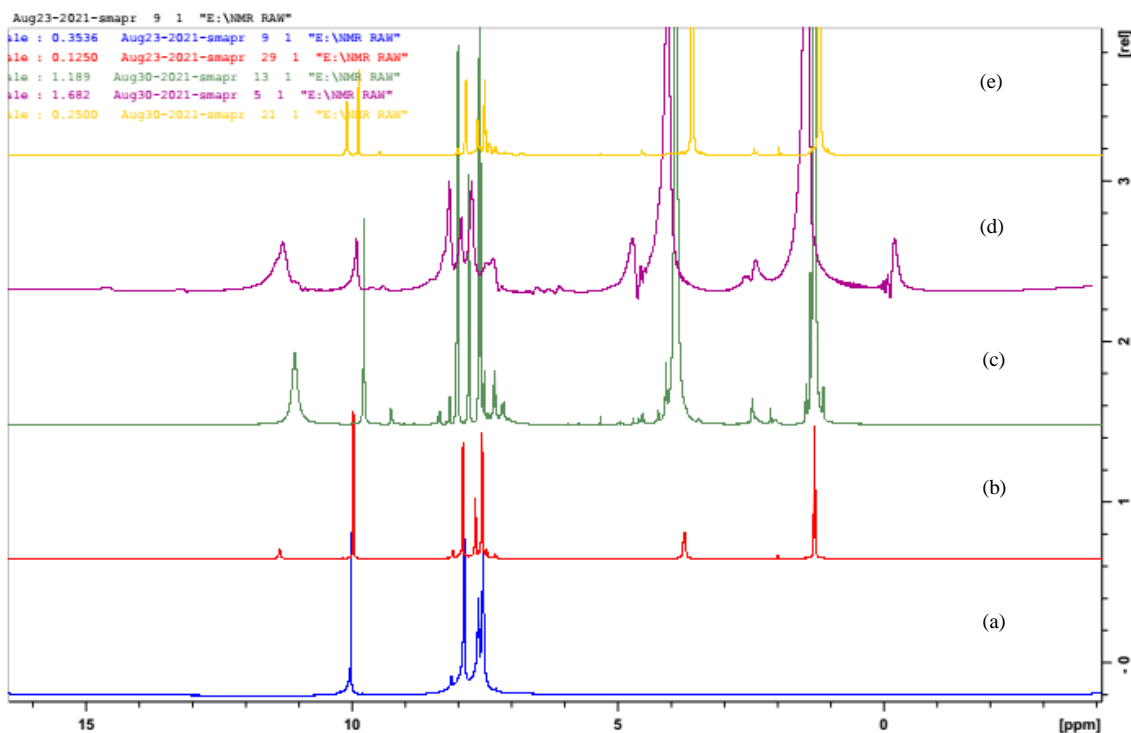

**Figure S3.**  $^1\text{H}$ -NMR spectra of benzaldehyde signals in  $\text{CDCl}_3$

- (a) Benzaldehyde only.
- (b) Benzaldehyde (20 mg) with  $\text{BF}_3 \cdot \text{OEt}_2$  (5  $\mu\text{L}$ ) after 5 minutes.
- (c) Benzaldehyde (20 mg) with  $\text{BF}_3 \cdot \text{OEt}_2$  (5  $\mu\text{L}$ ) after 10 minutes.
- (d) Benzaldehyde (20 mg) with  $\text{BF}_3 \cdot \text{OEt}_2$  (5  $\mu\text{L}$ ) after 20 minutes.
- (e) A mixture of benzaldehyde,  $\text{BF}_3 \cdot \text{OEt}_2$  (5  $\mu\text{L}$ ) and 1 drop of  $\text{D}_2\text{O}$  after 30 minutes.

# Copies of $^1\text{H}$ and $^{13}\text{C}$ NMR spectra

$^1\text{H}$  NMR spectrum of 3a

apr-17 PROTON CDC13 2/6/2019

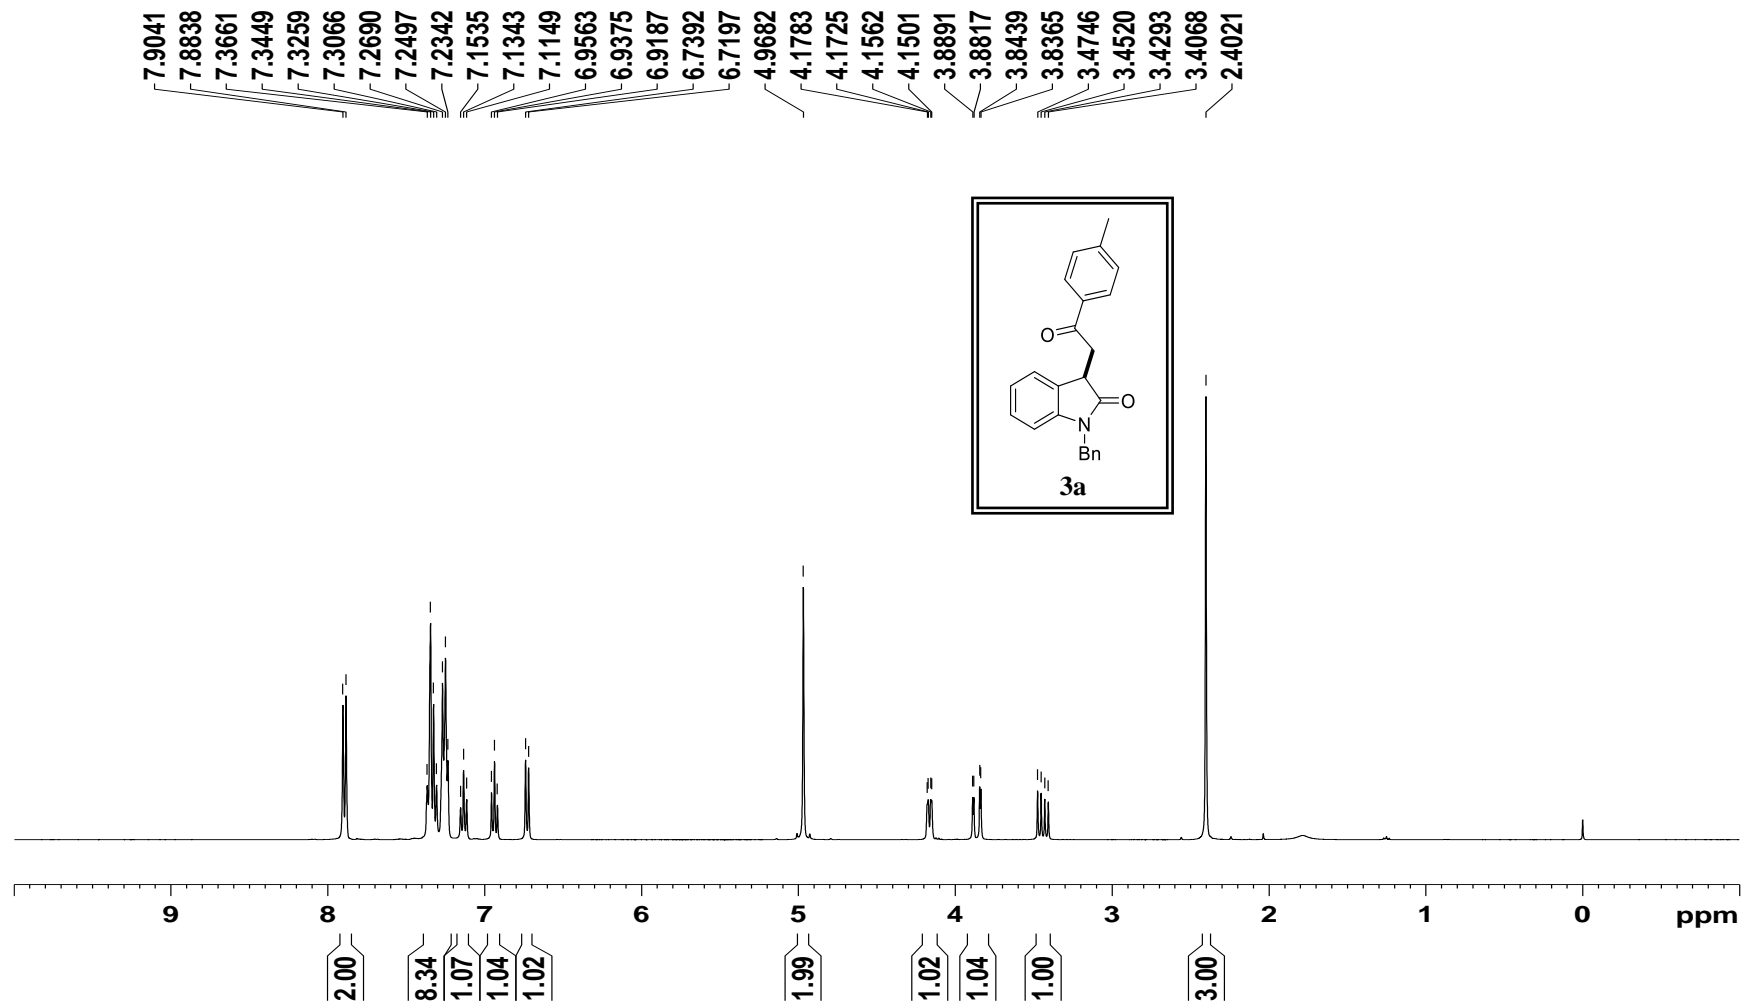

<sup>13</sup>C NMR spectrum of **3a**

apr-17 C13CPD CDC13 2/6/2019

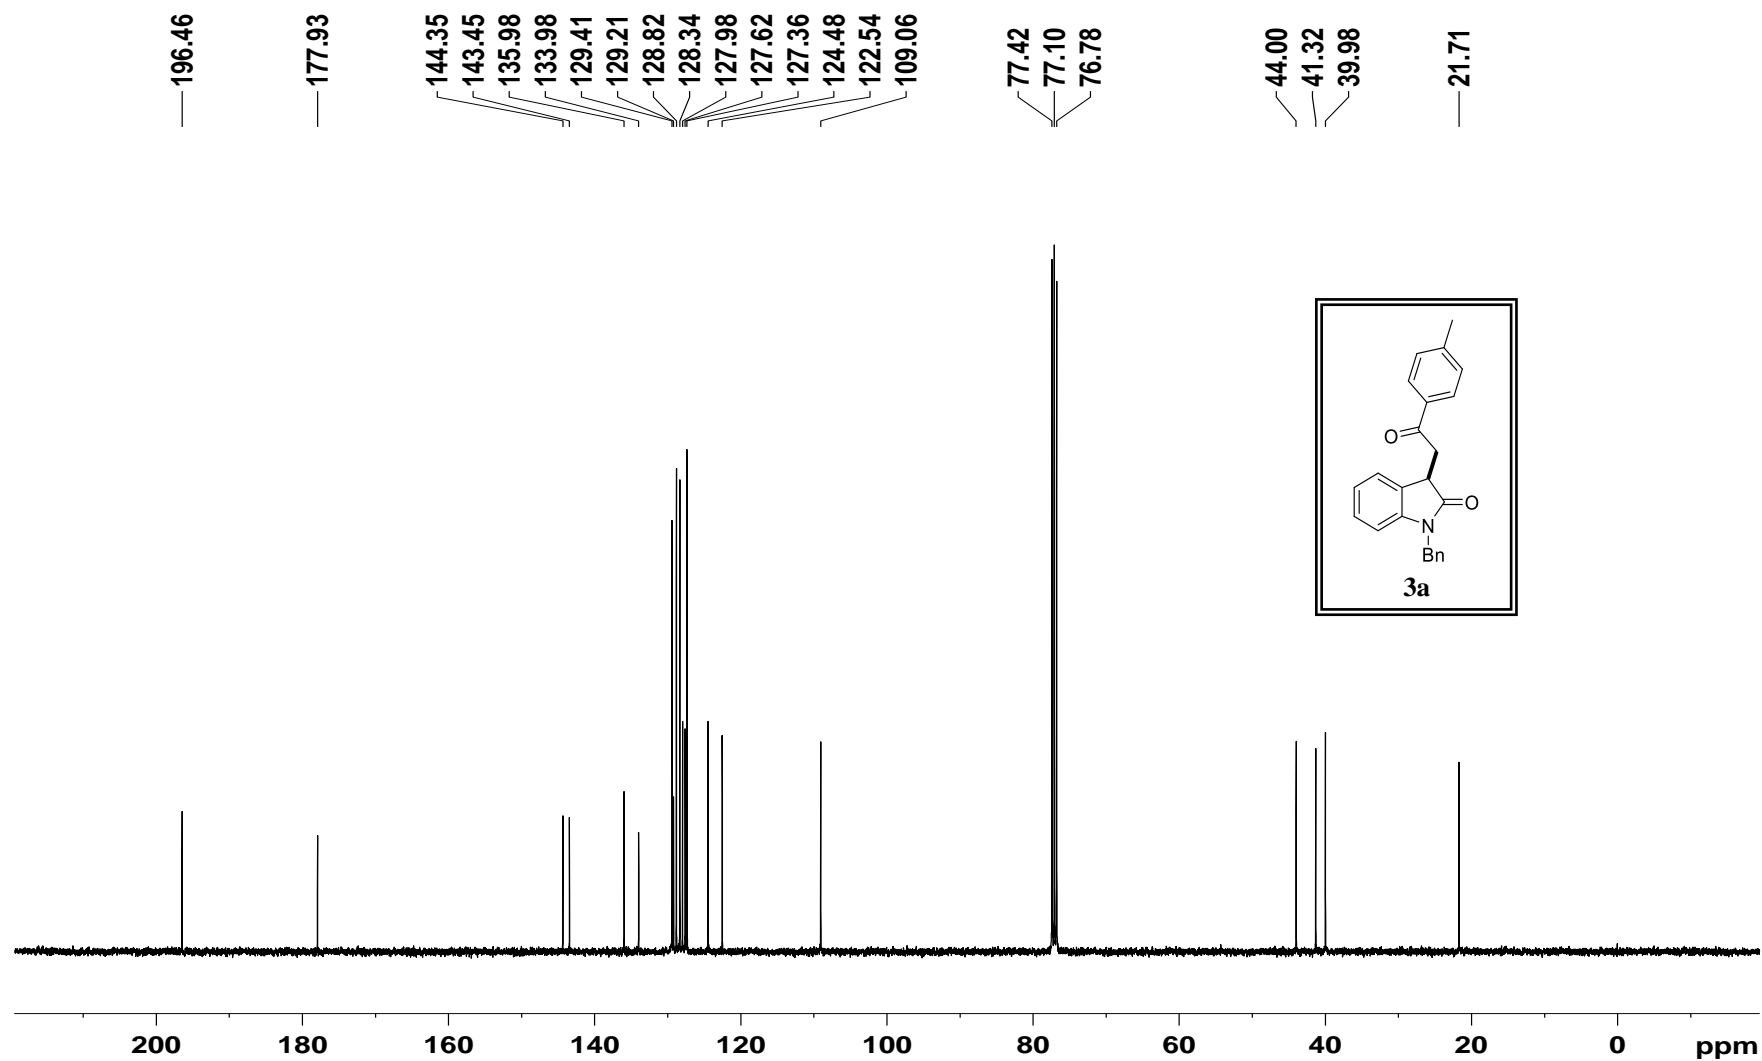

COSY spectrum of 3a

apr-17 COSYGPSW CDC13 2/6/2019

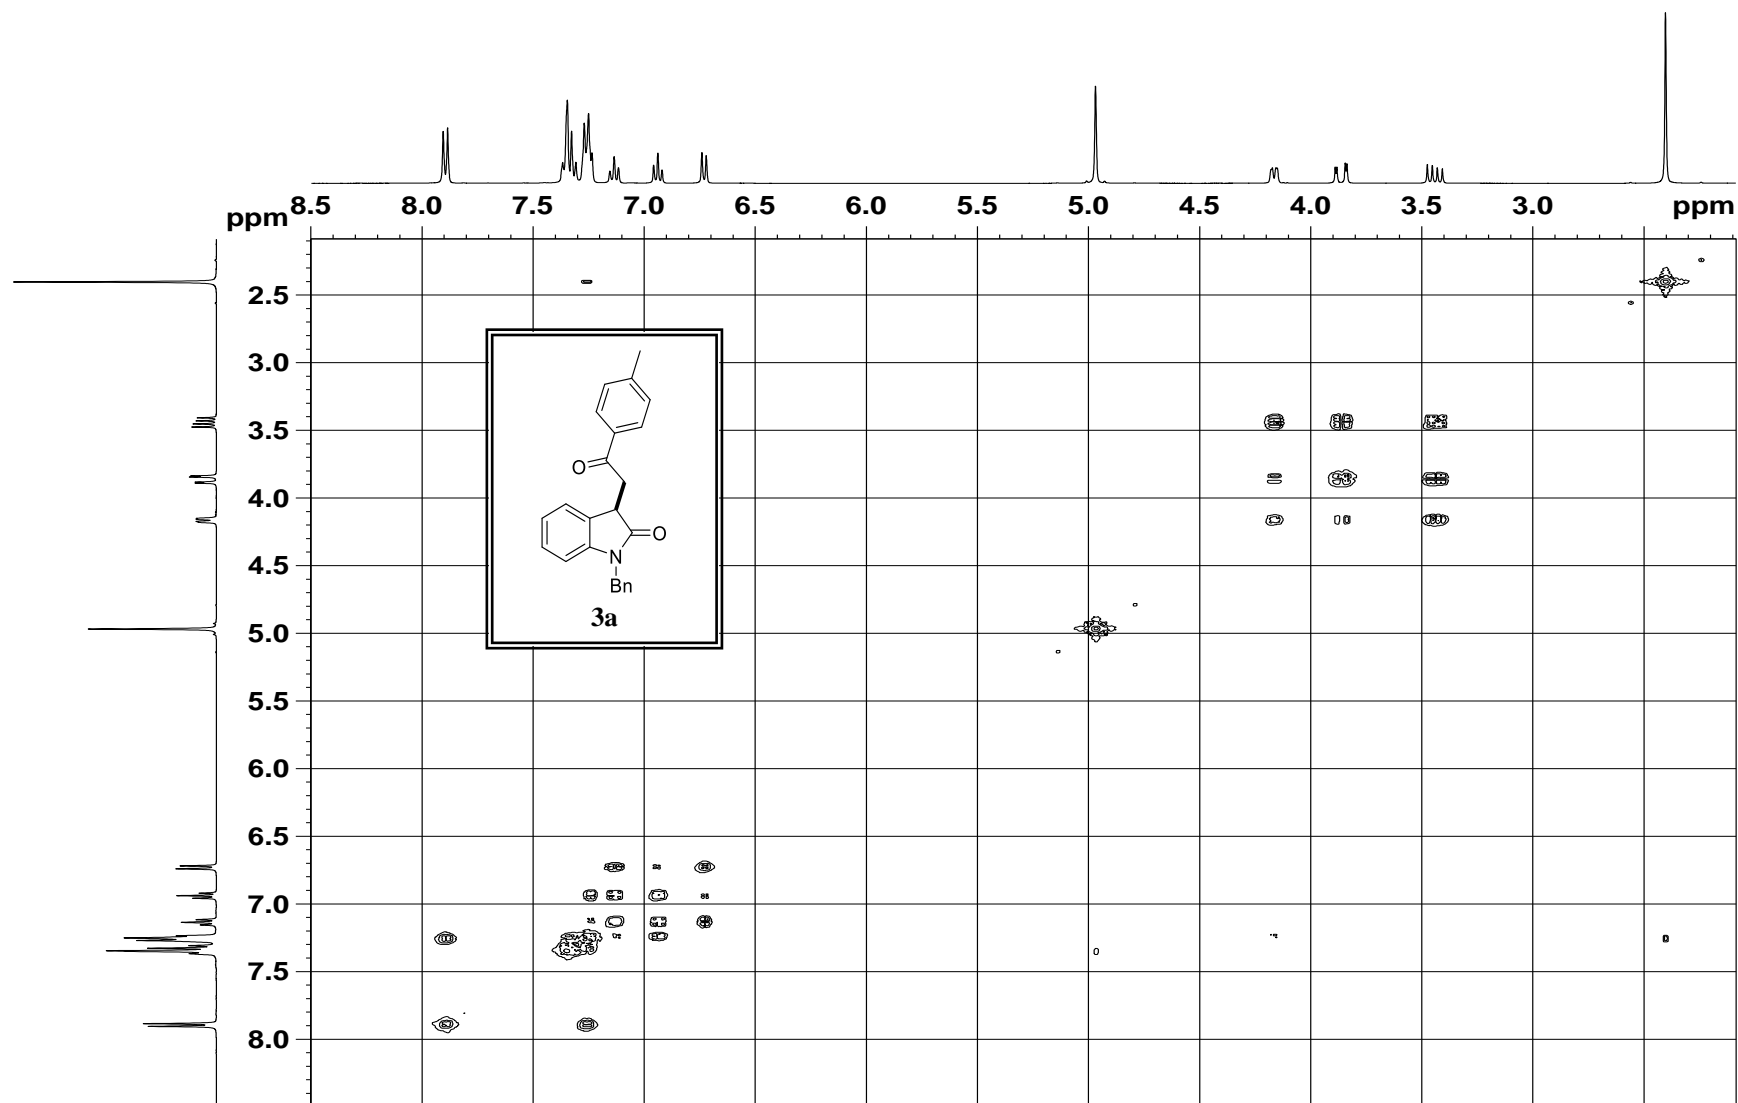

HSQC spectrum of **3a**

apr-17 HSQCGP CDC13 2/6/2019

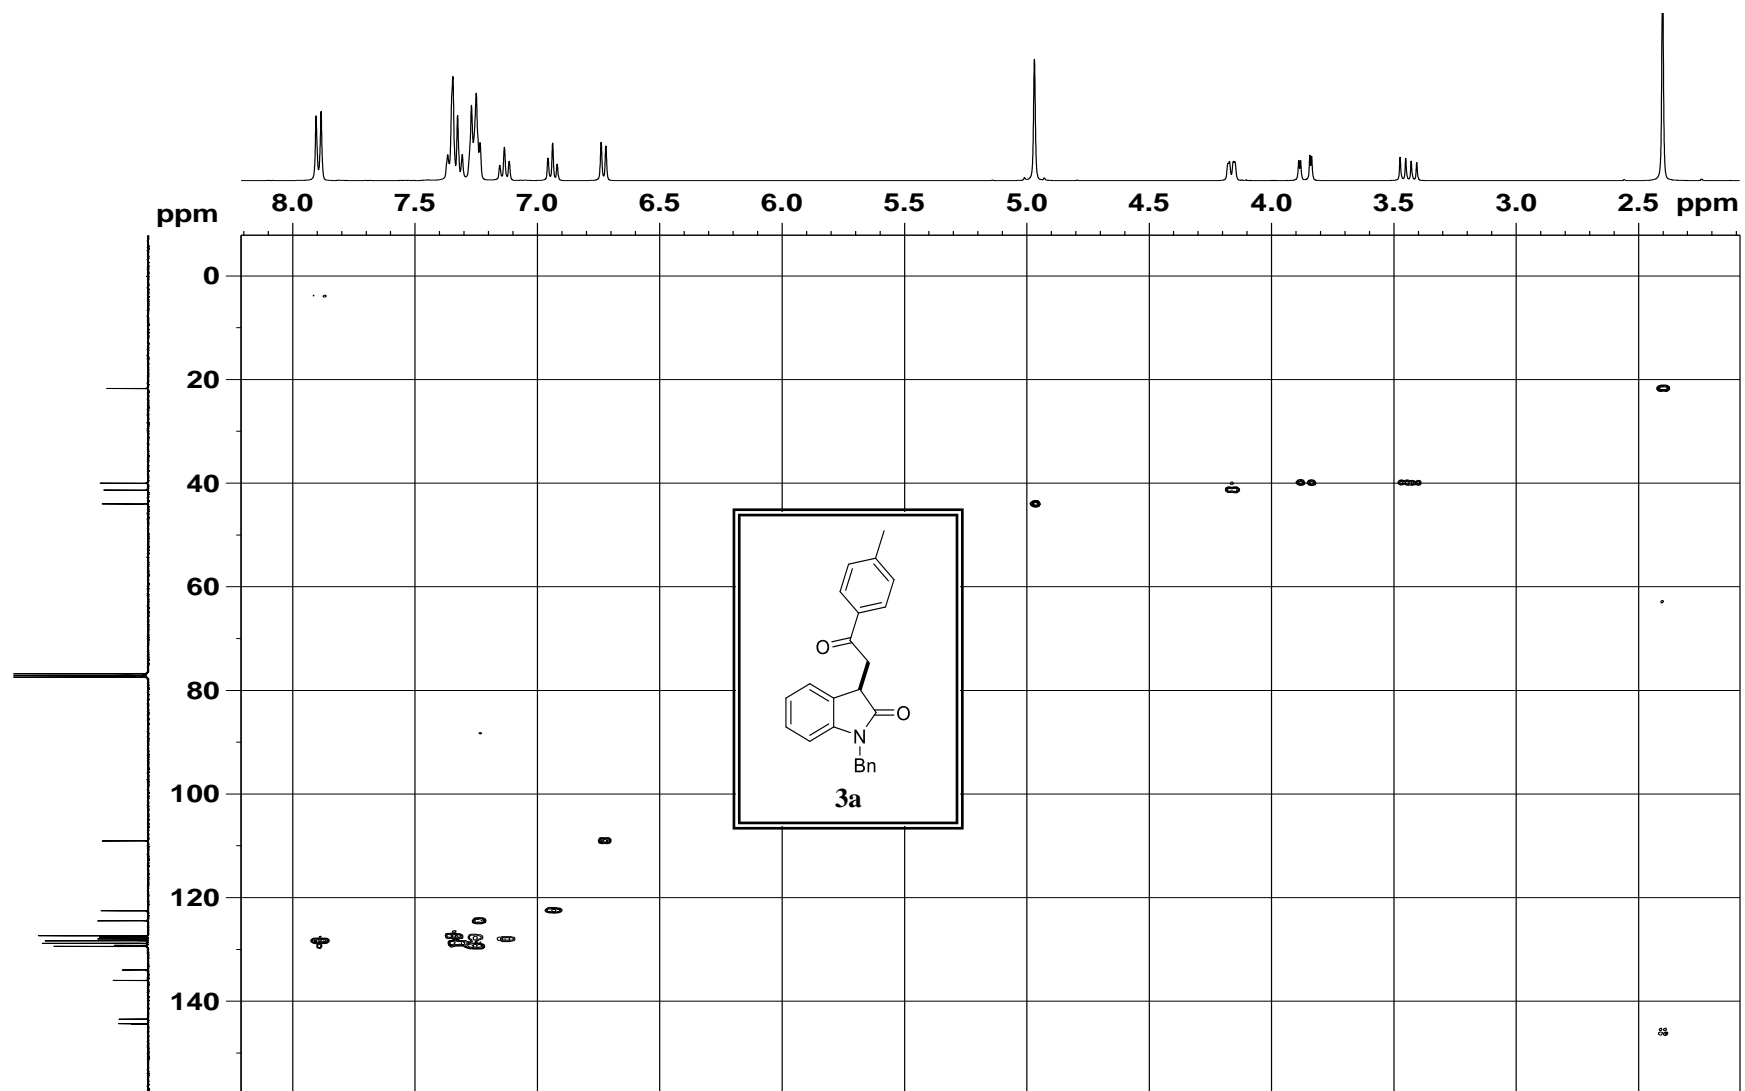



<sup>1</sup>H NMR spectrum of **3b**

apr-12 PROTON CDC13 30/12/2015

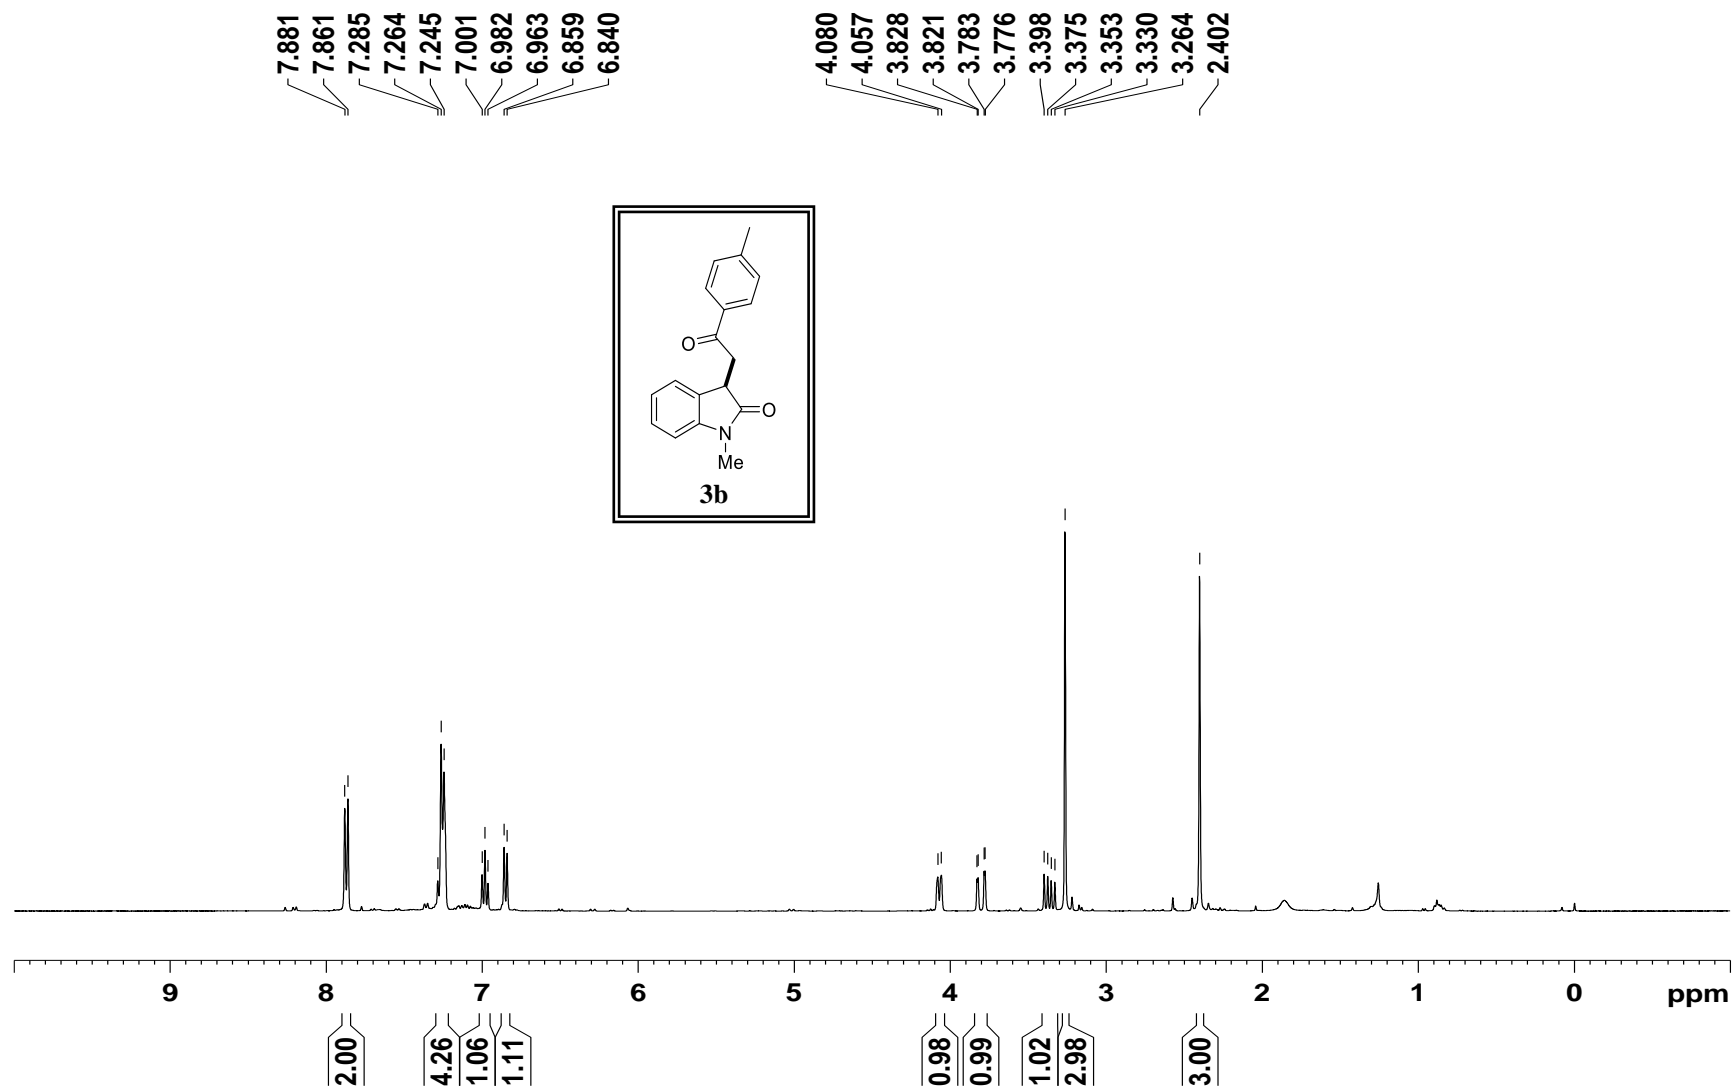

<sup>13</sup>C NMR spectrum of **3b**

apr-12 C13CPD CDC13 31/12/2015

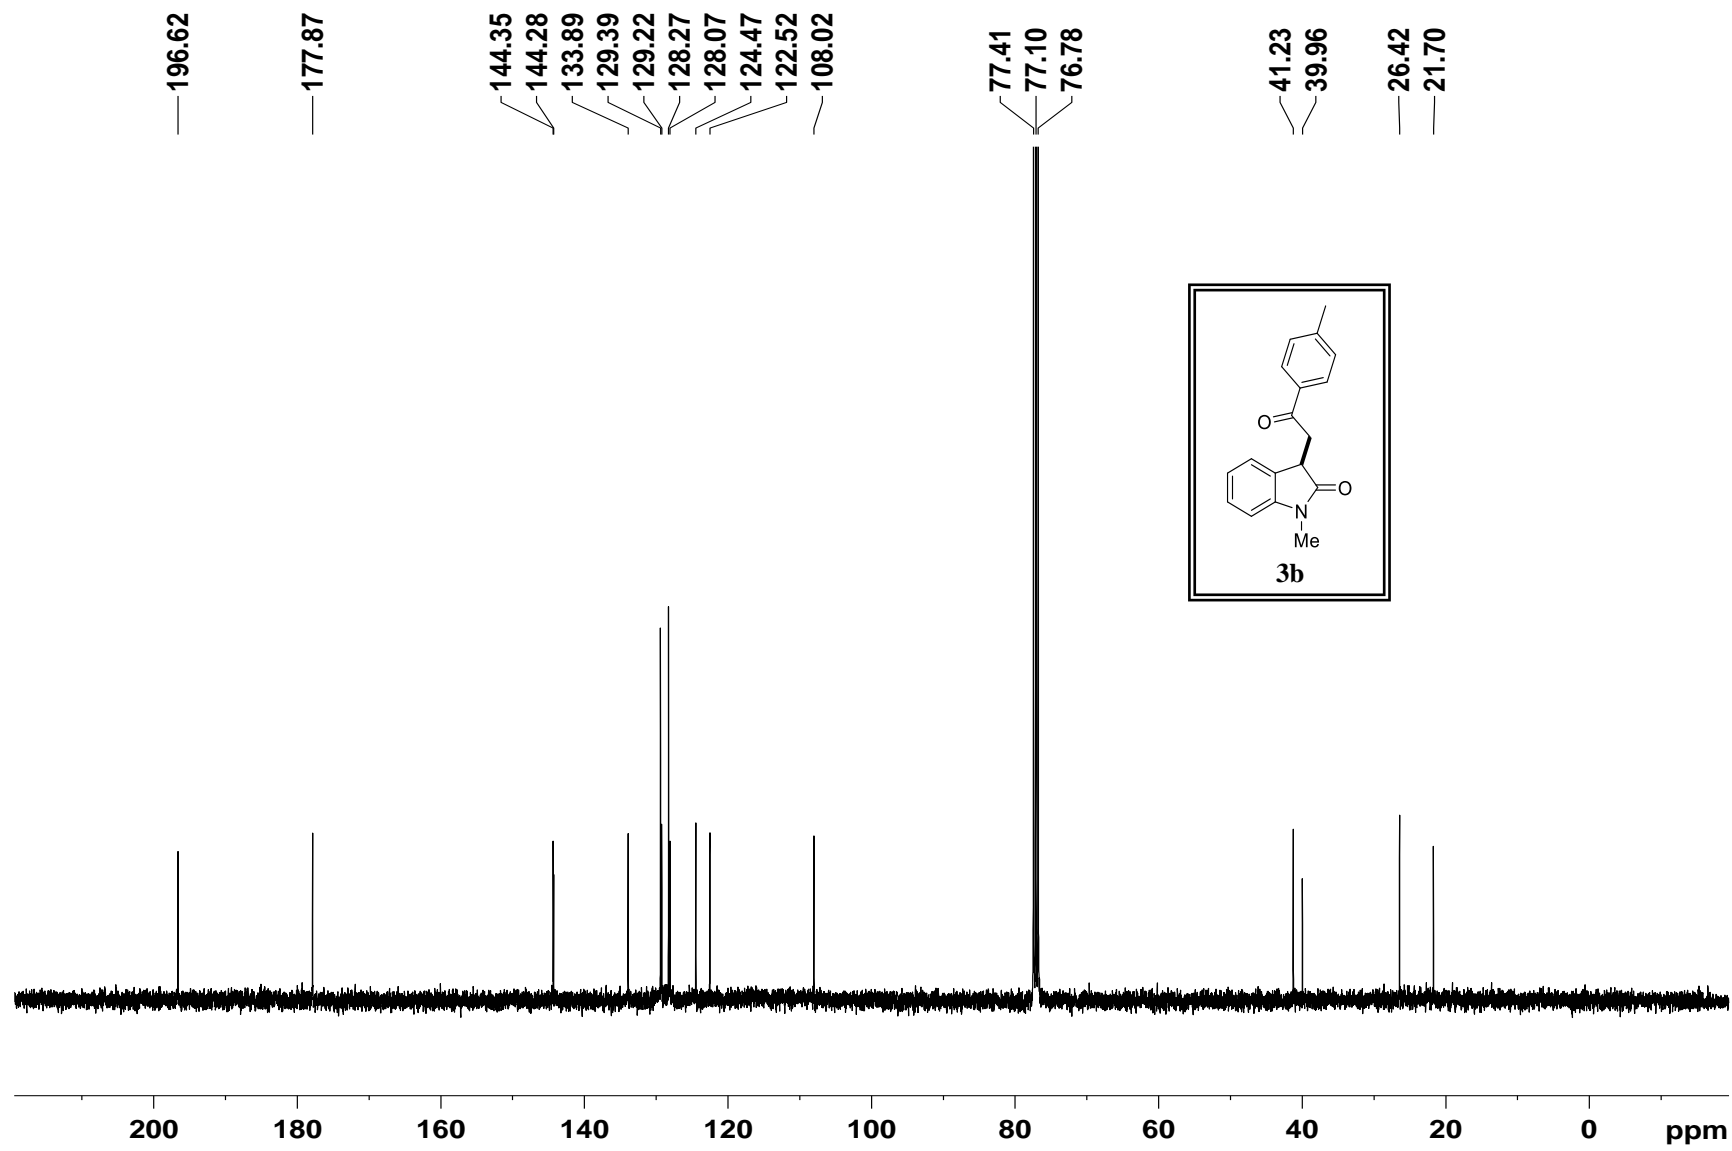

<sup>1</sup>H NMR spectrum of 3c

apr-144 PROTON CDC13 1/9/2017

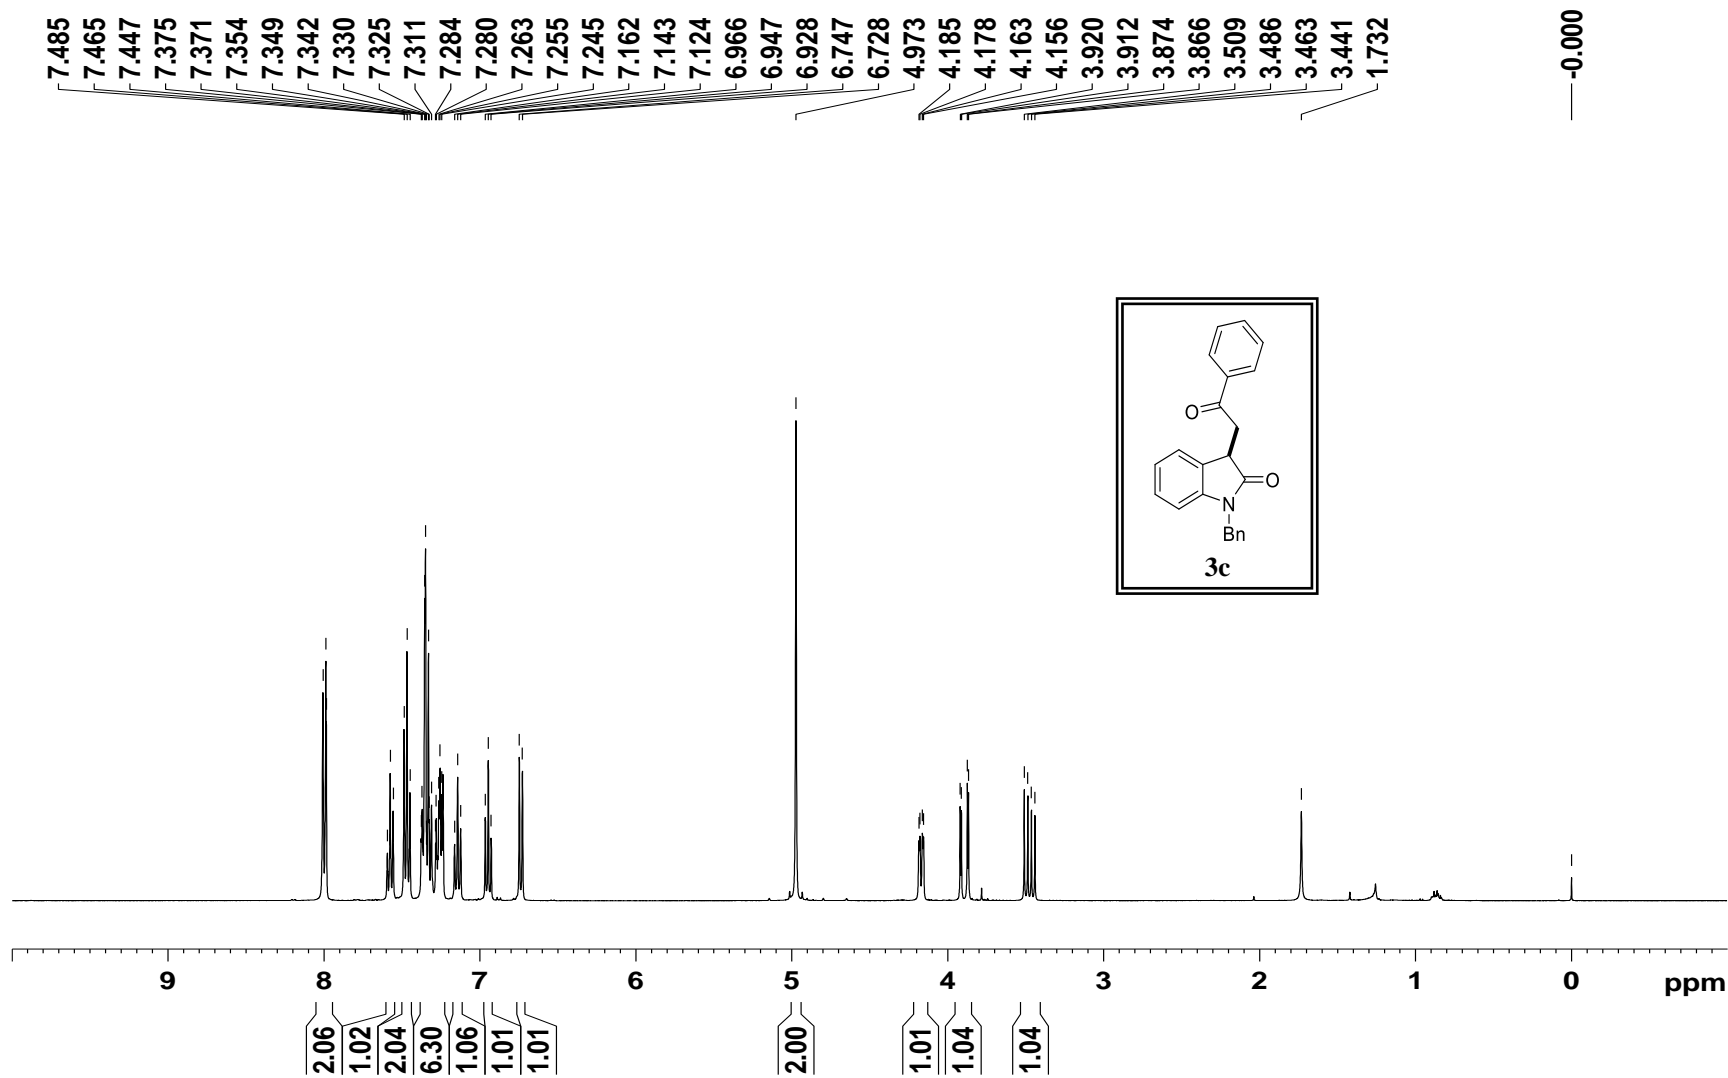

$^{13}\text{C}$  NMR spectrum of **3c**

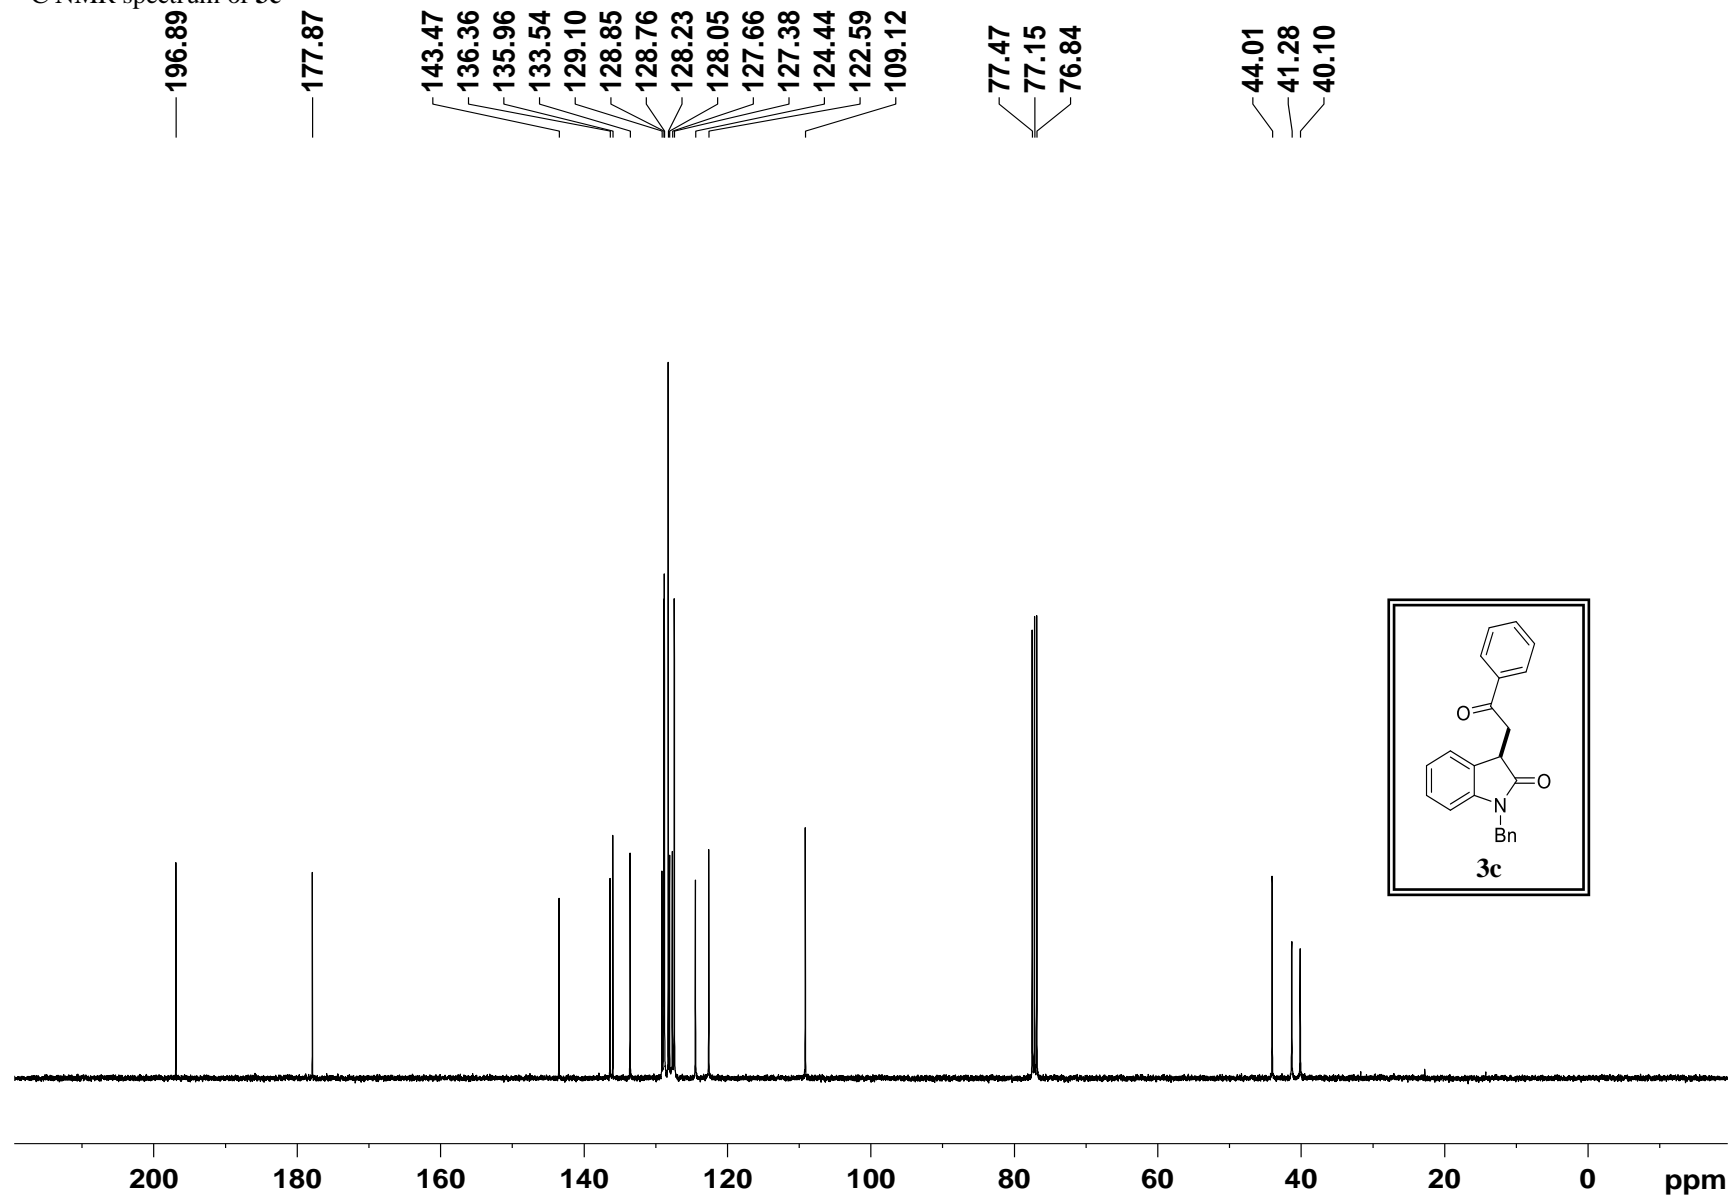

<sup>1</sup>H NMR spectrum of **3d**

apr-348 PROTON CDC13 17/10/2018

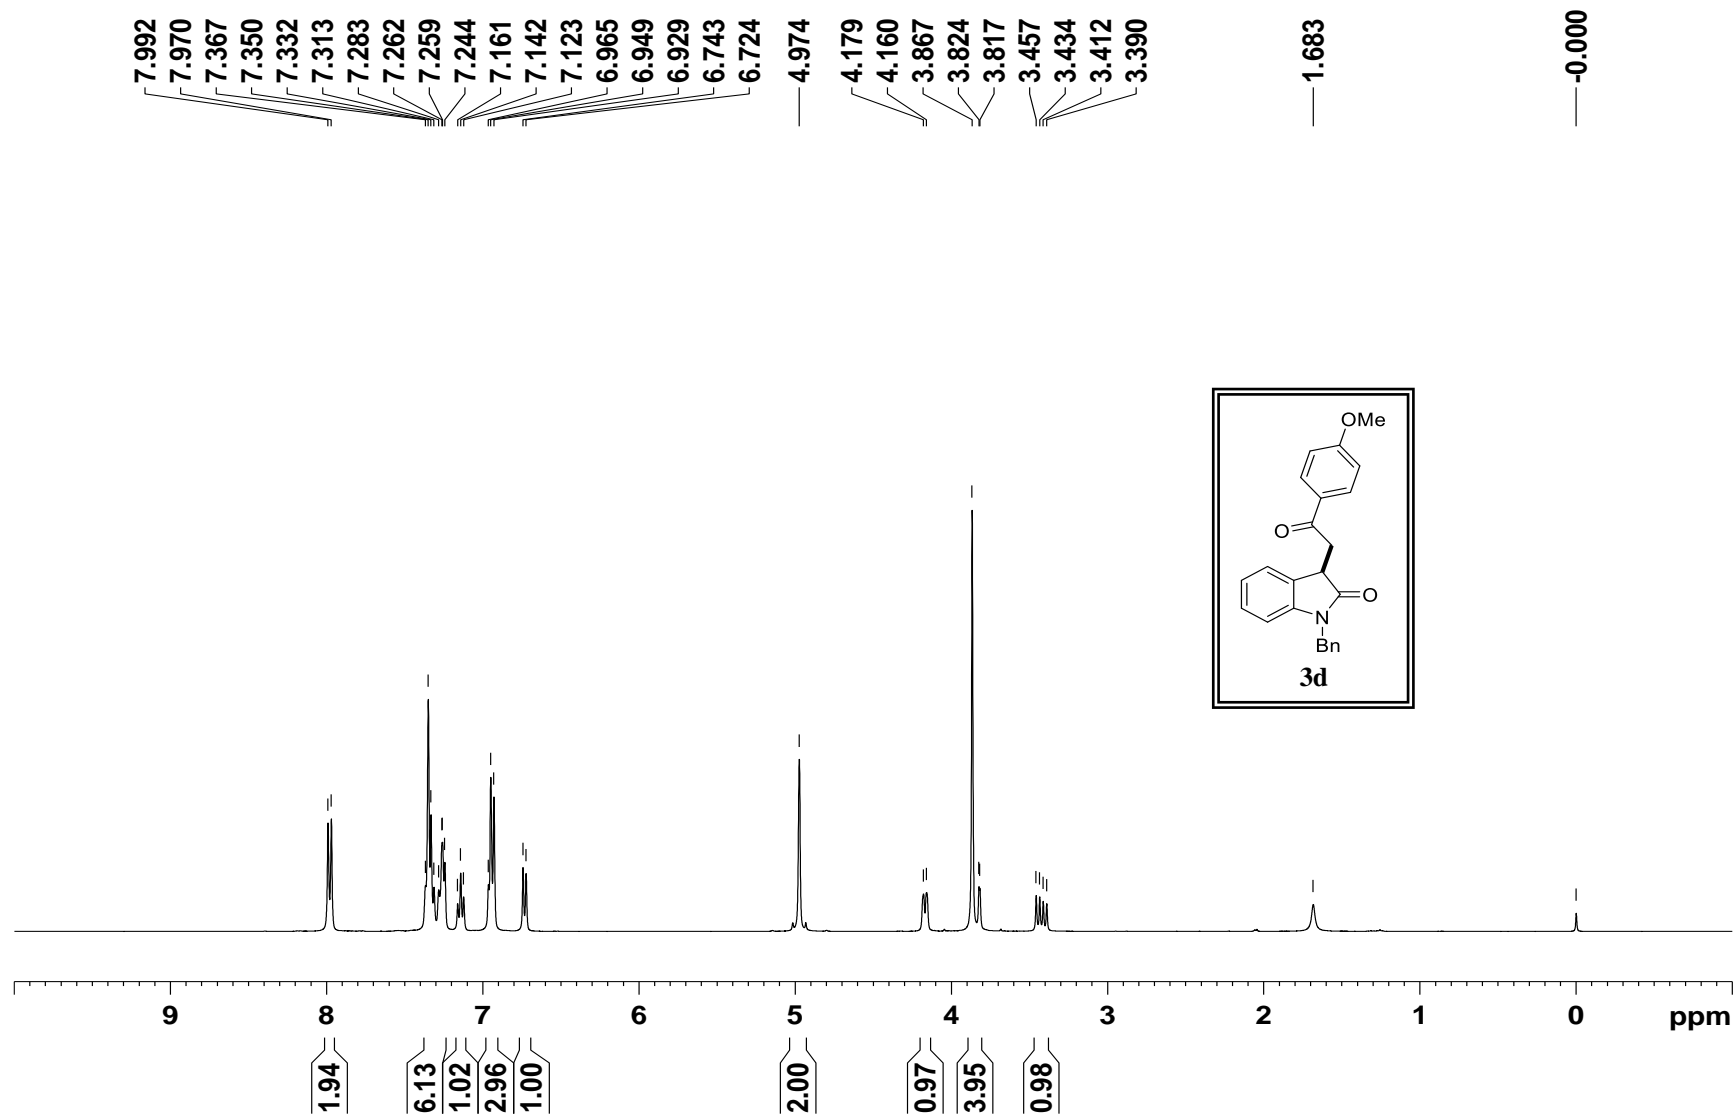

<sup>13</sup>C NMR spectrum of **3d**

apr-348 C13CPD CDC13 17/10/2018

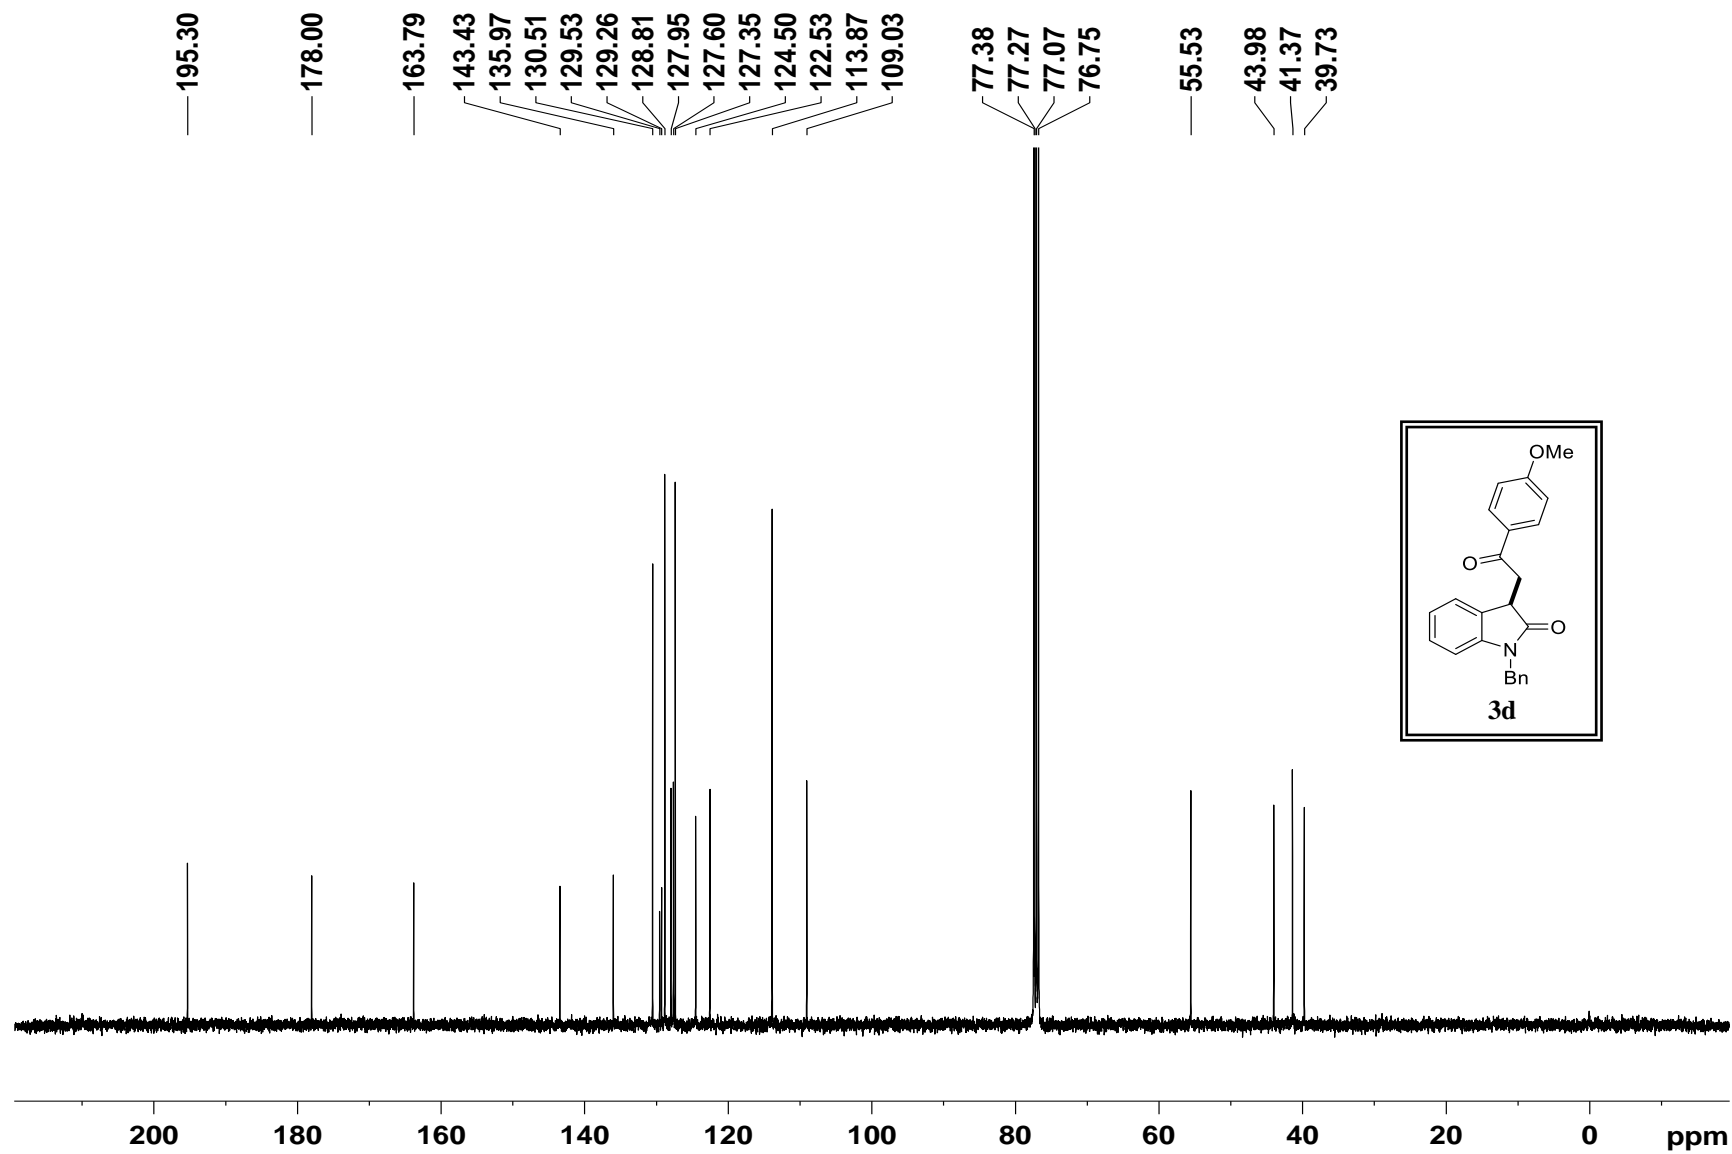

<sup>1</sup>H NMR spectrum of **3f**

apr-365 PROTON CDC13 10/12/2018

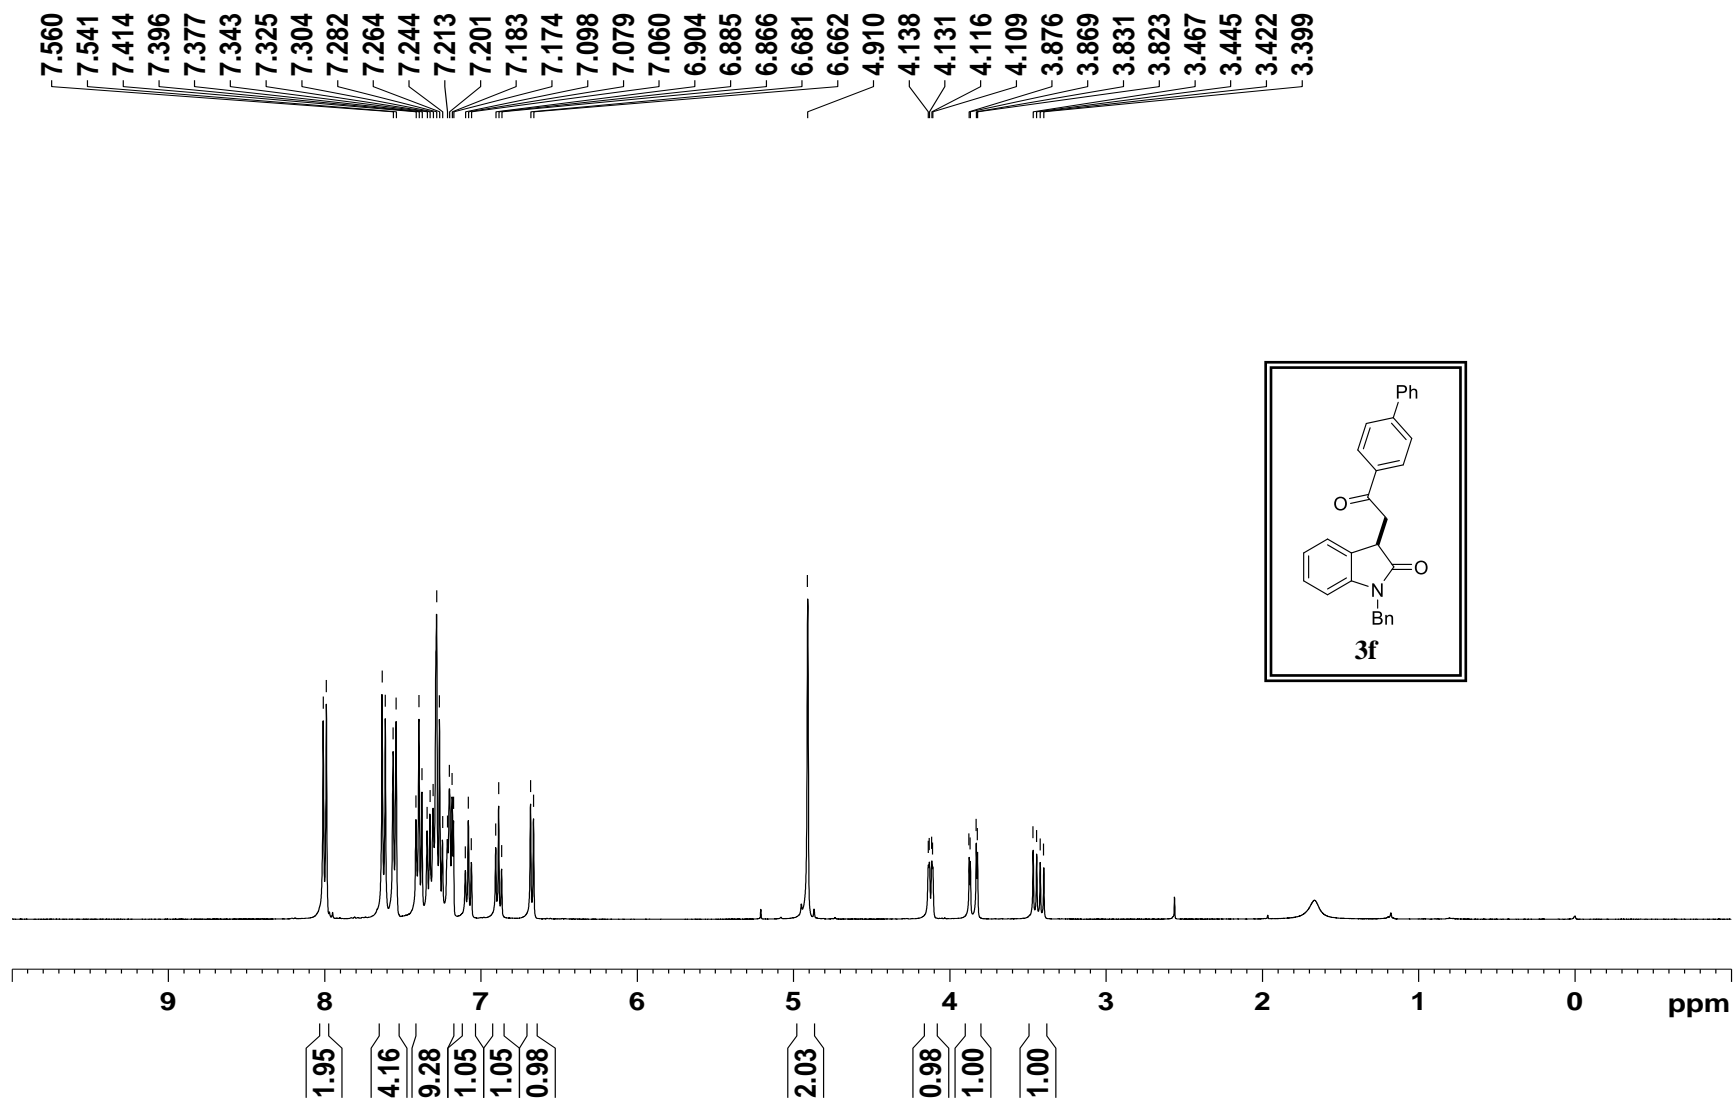

<sup>13</sup>C NMR spectrum of **3f**

apr-365 C13CPD CDC13 10/12/2018

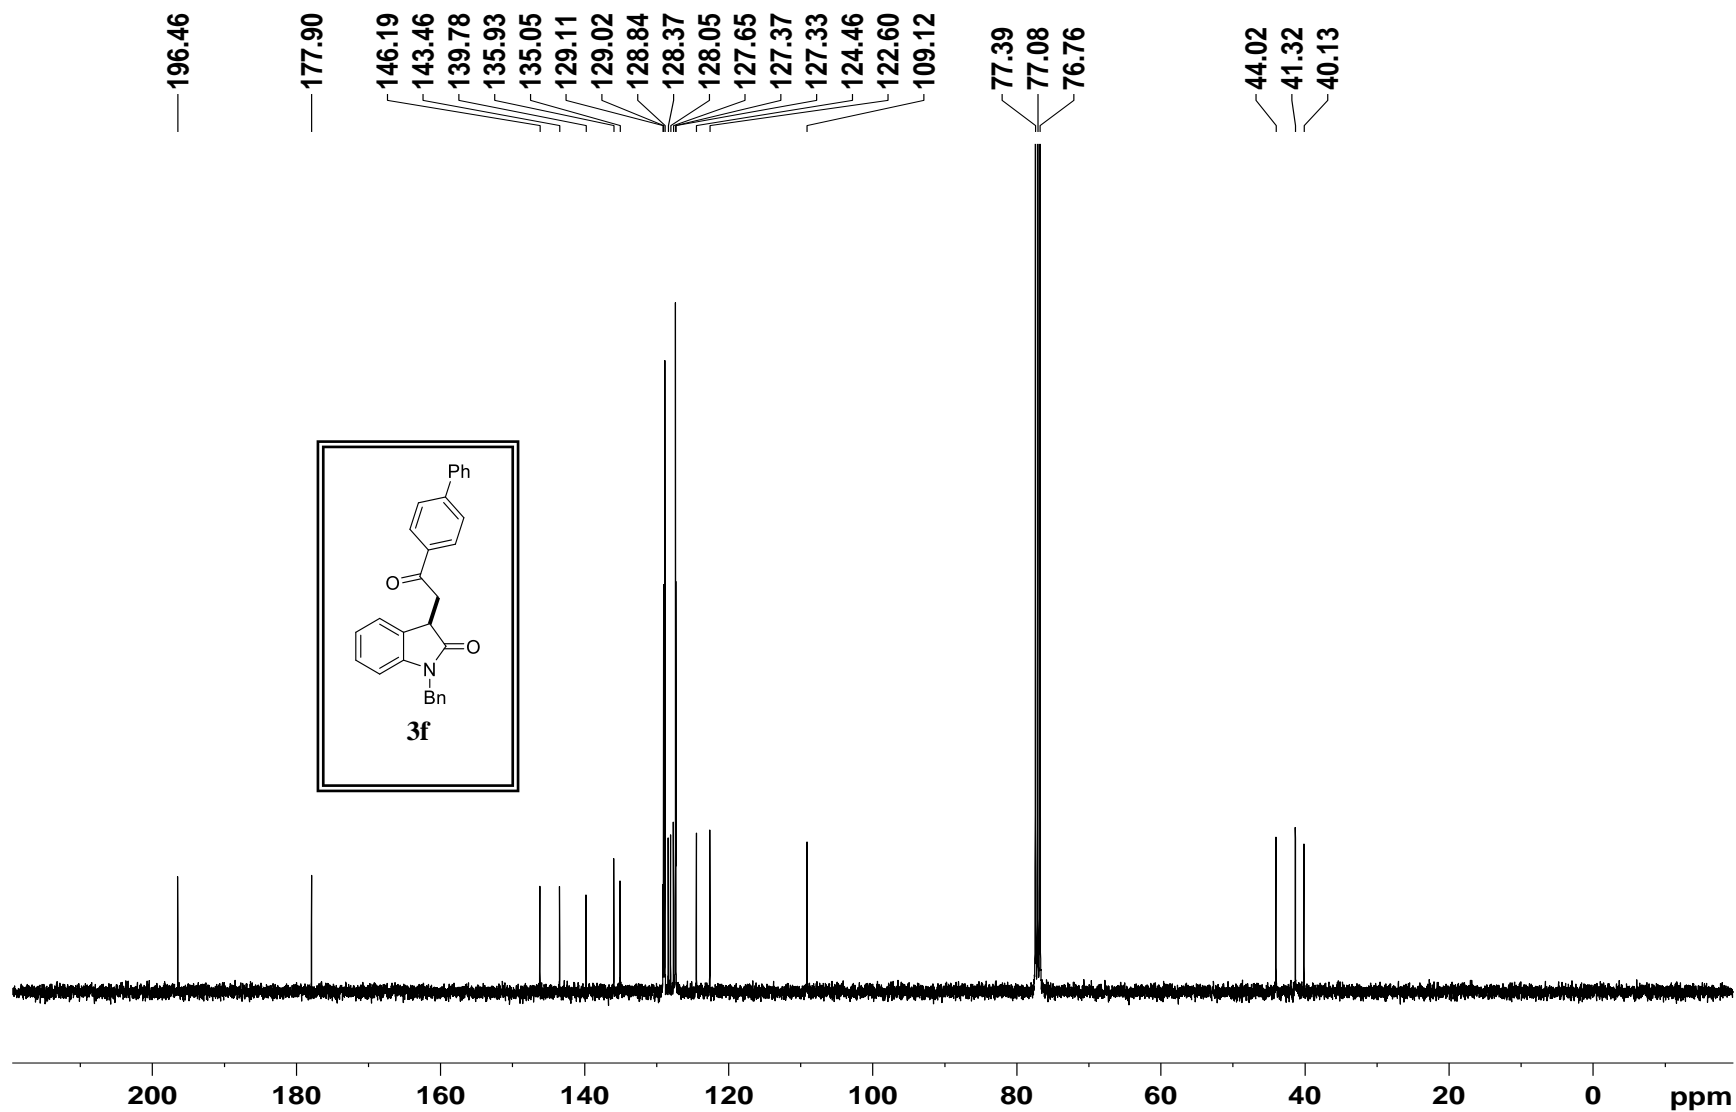



<sup>1</sup>H NMR spectrum of 3g

apr-384 PROTON CDC13 28/12/2018

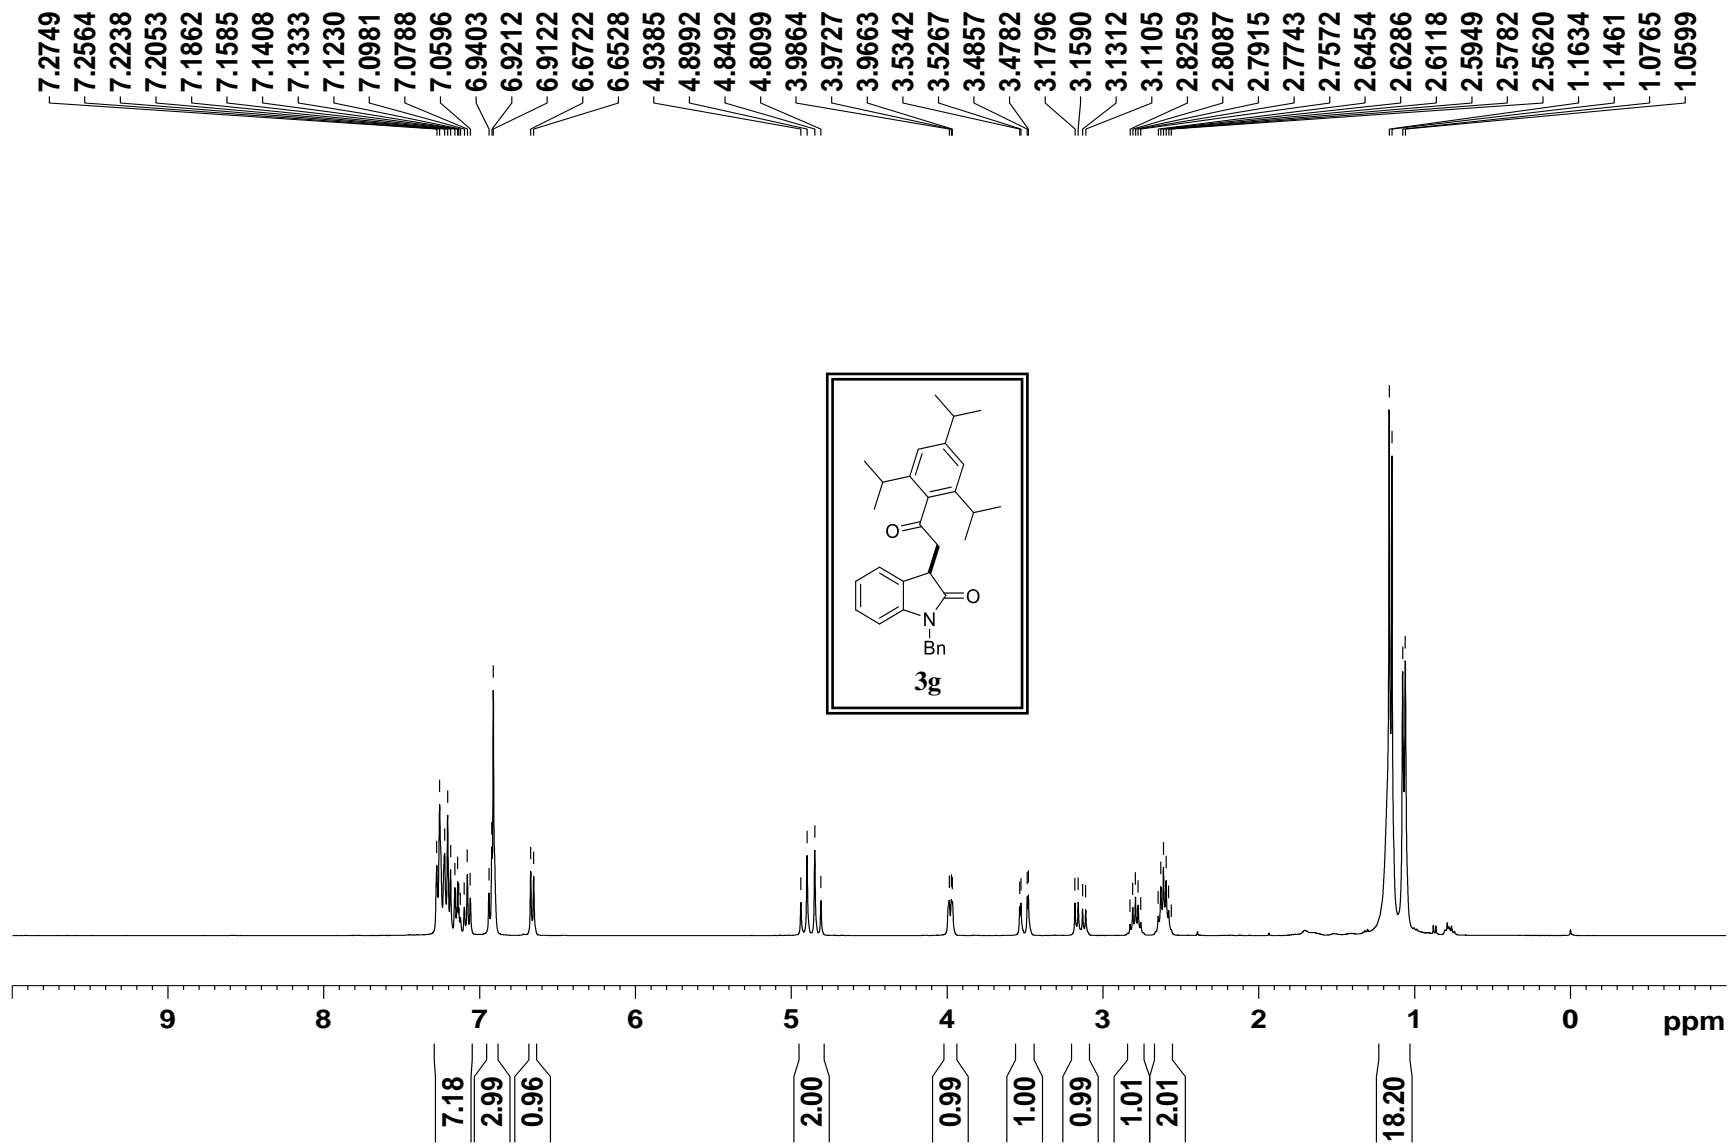

<sup>13</sup>C NMR spectrum of **3g**

apr-384 C13CPD CDC13 28/12/2018

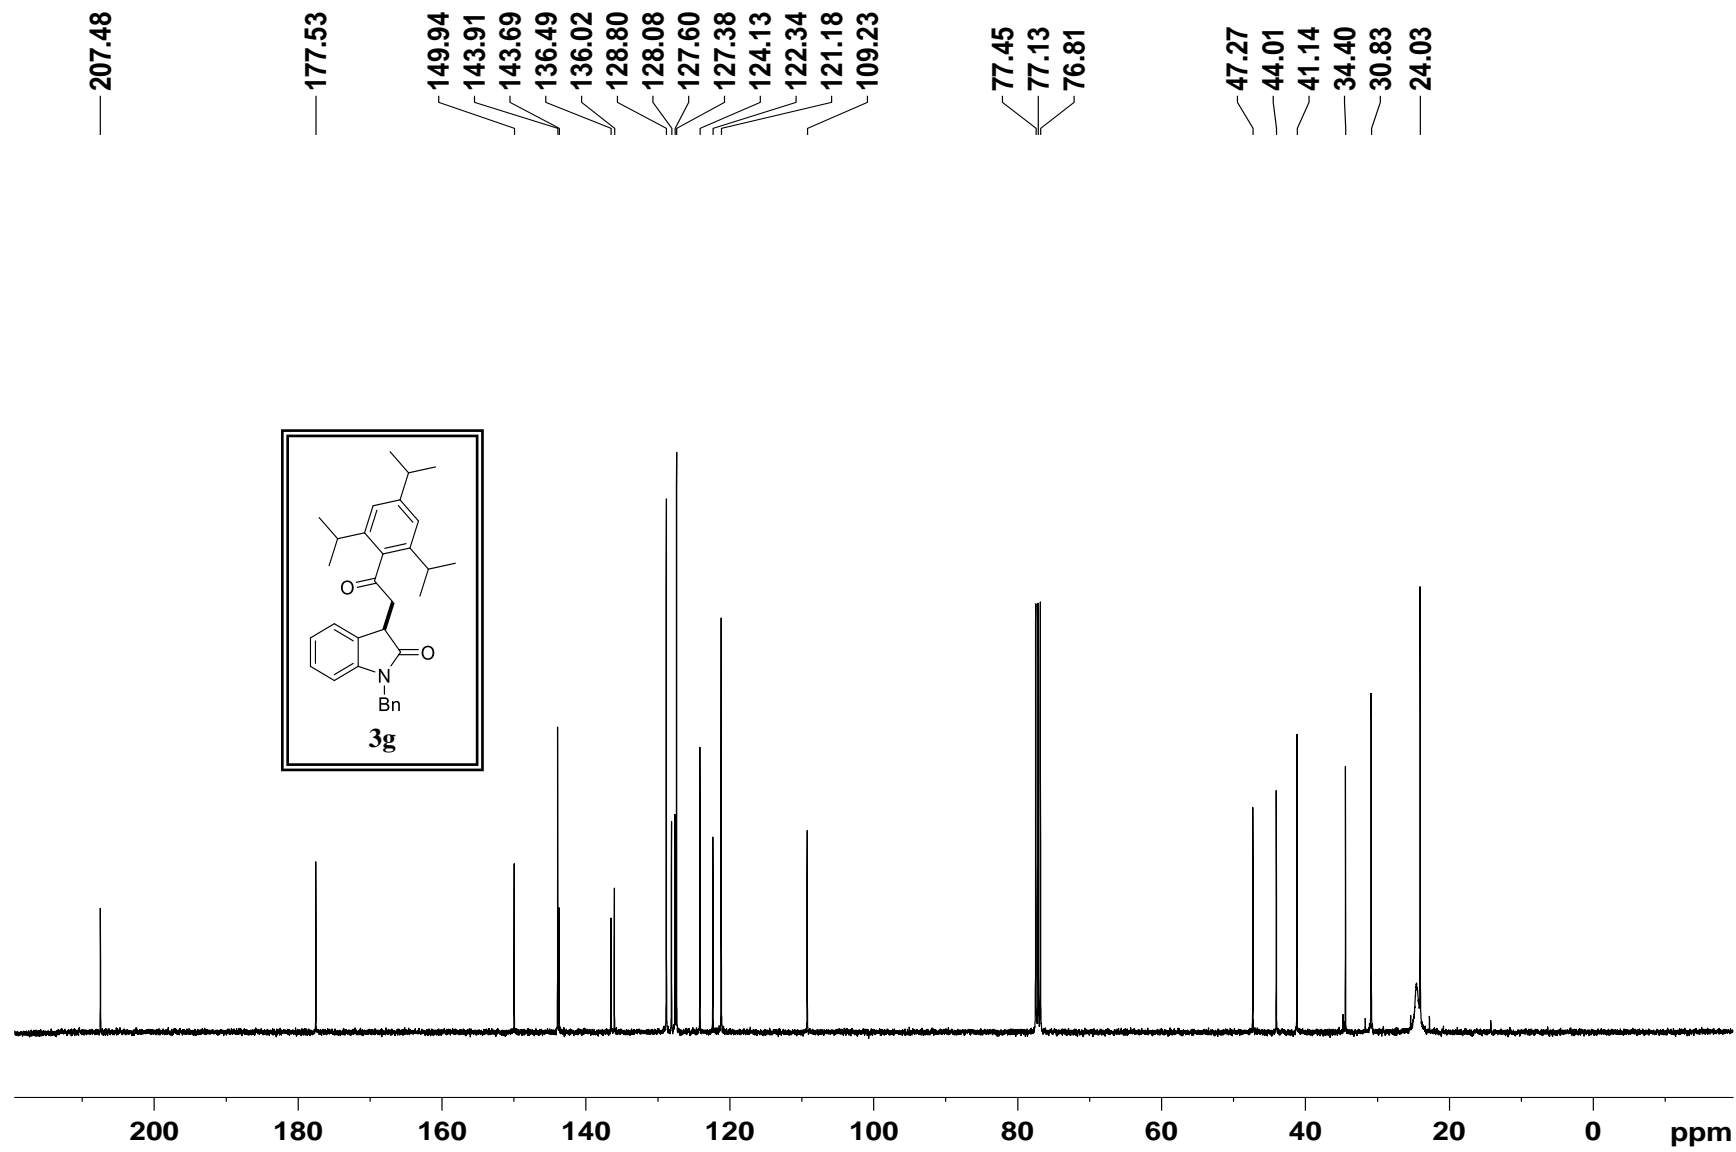

<sup>1</sup>H NMR spectrum of **3i**

apr-41 PROTON CDC13 12/9/2017

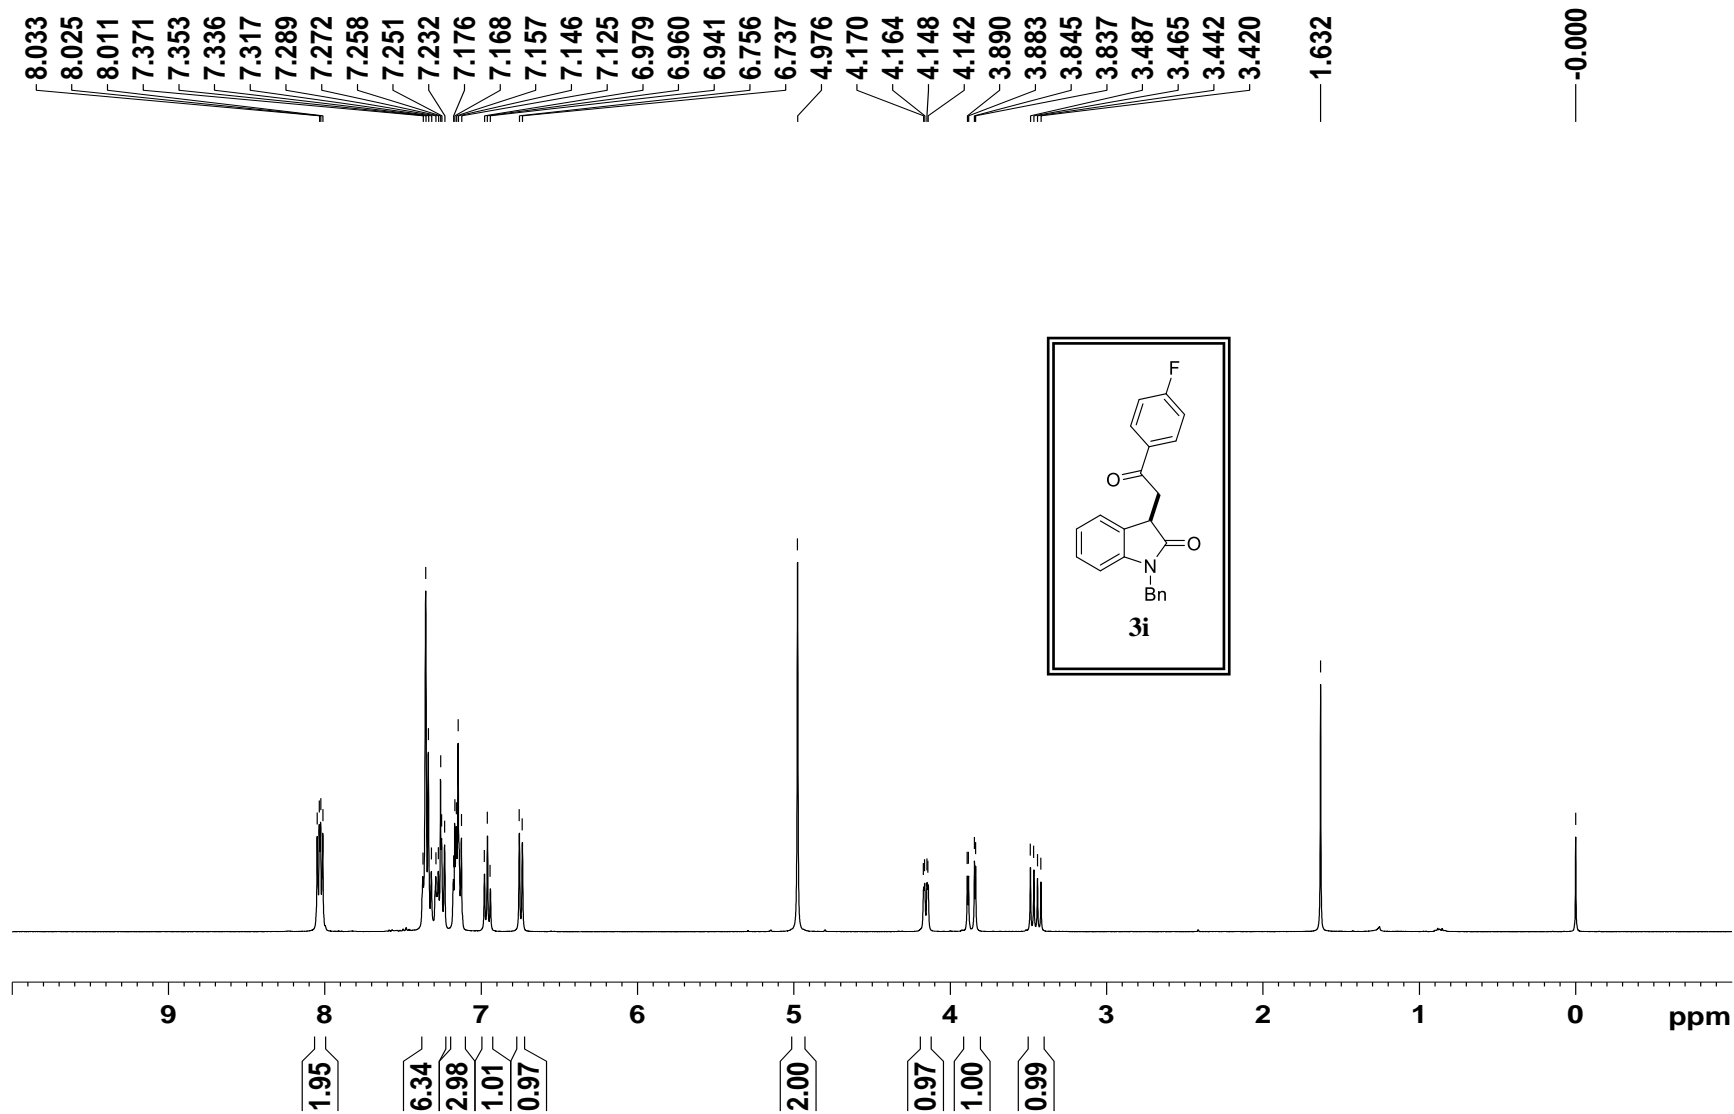

<sup>13</sup>C NMR spectrum of **3i**

apr-41 C13CPD CDC13 13/9/2017

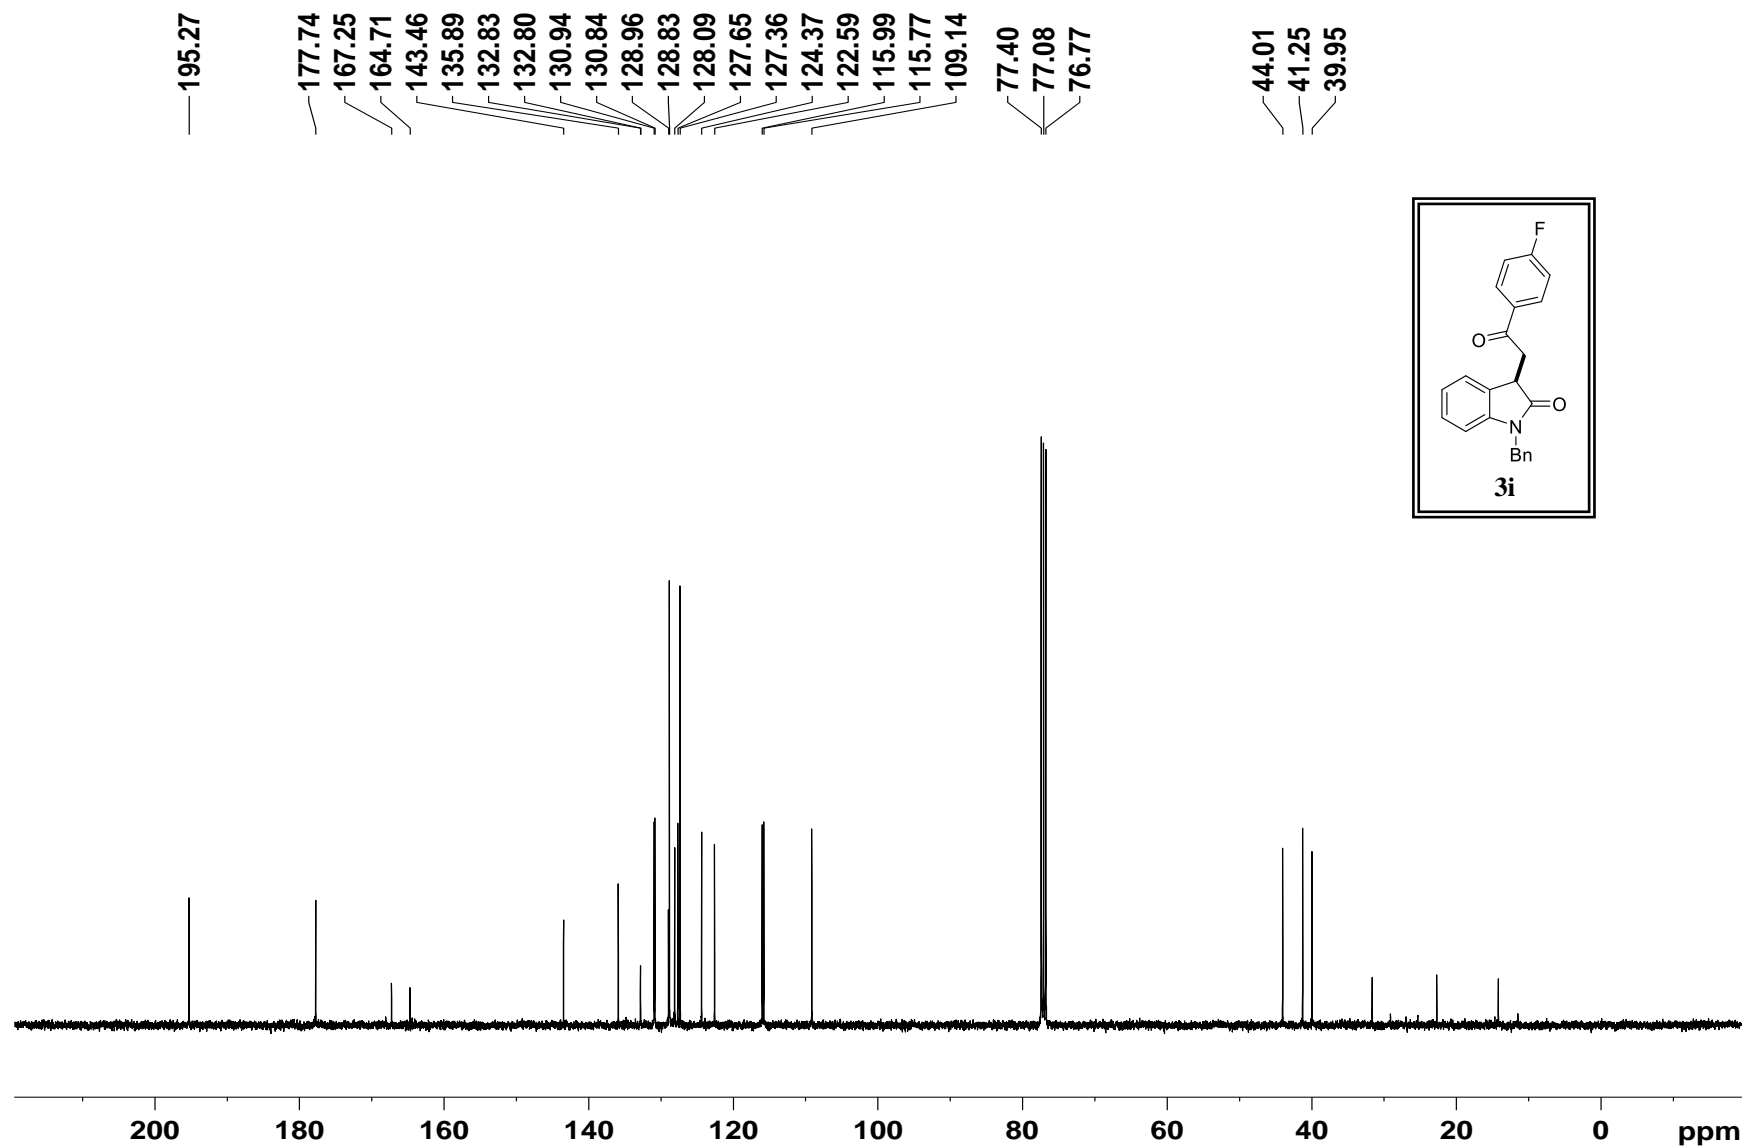

<sup>1</sup>H NMR spectrum of **3j**

apr-151 PROTON CDC13 20/9/2017

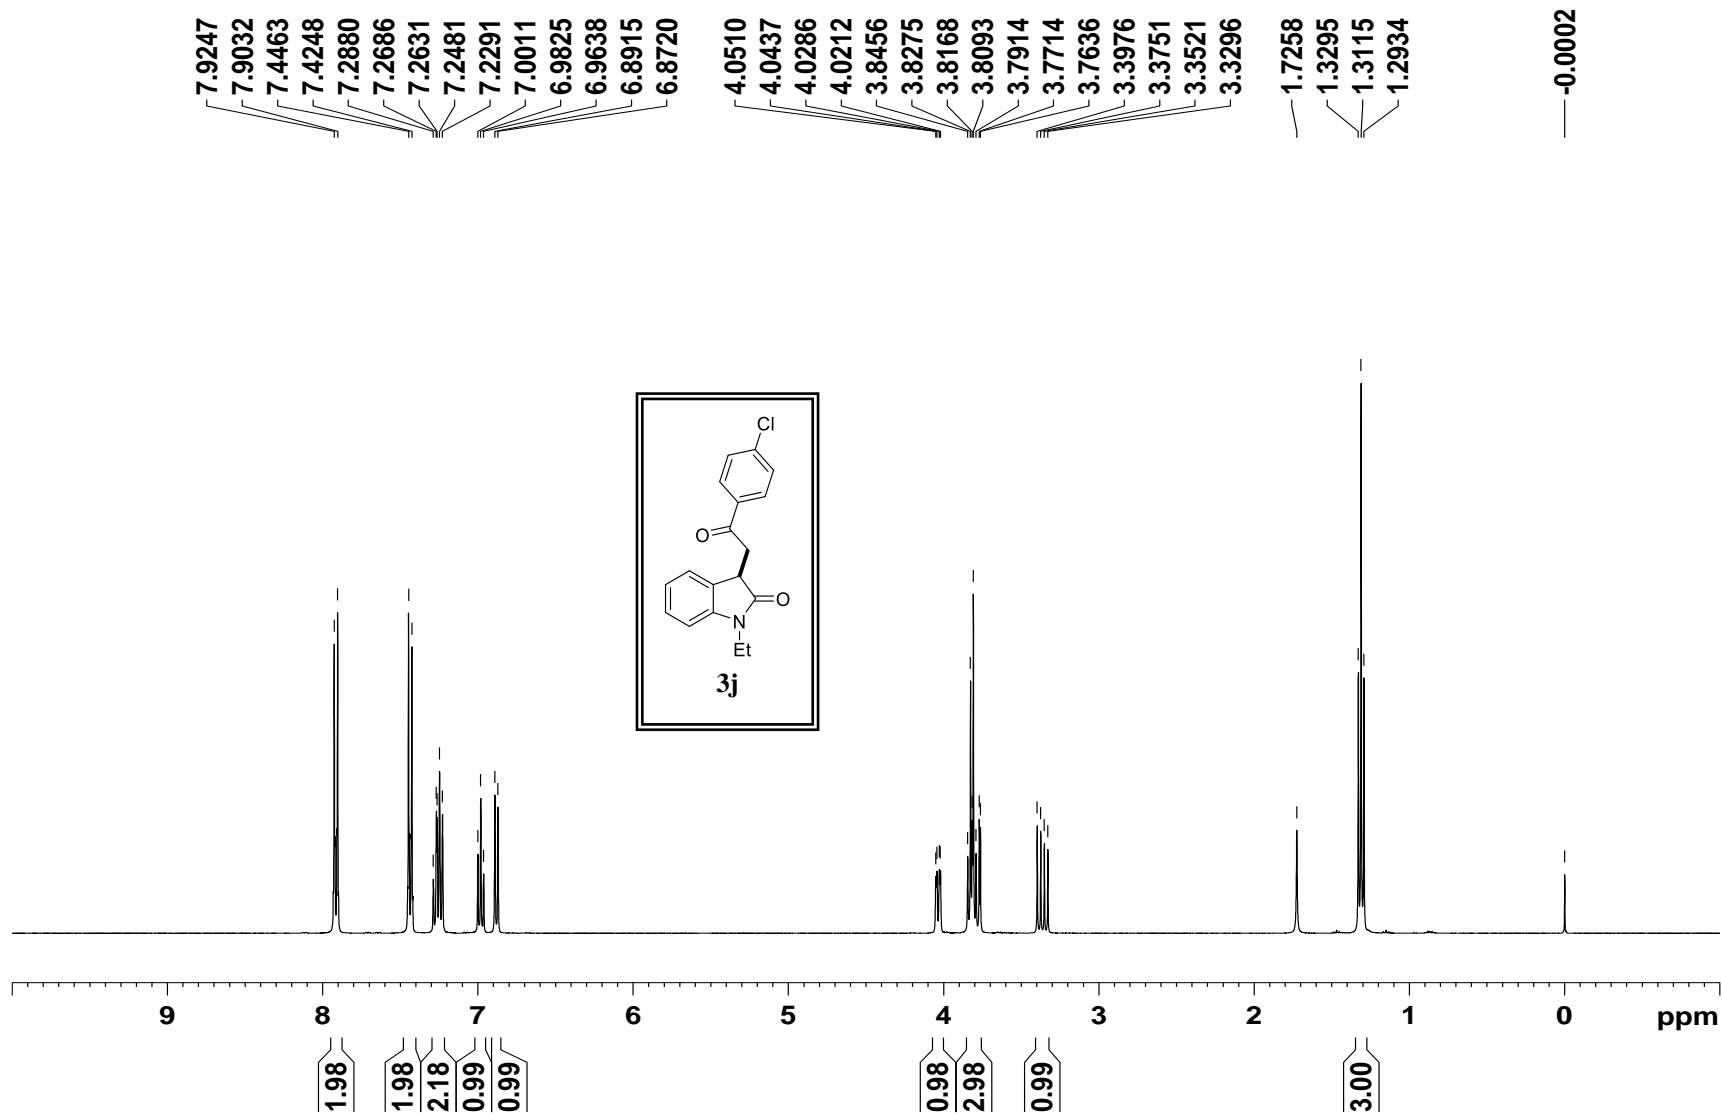

<sup>13</sup>C NMR spectrum of **3j**

Apr-151 C13CPD CDC13 20/9/2017

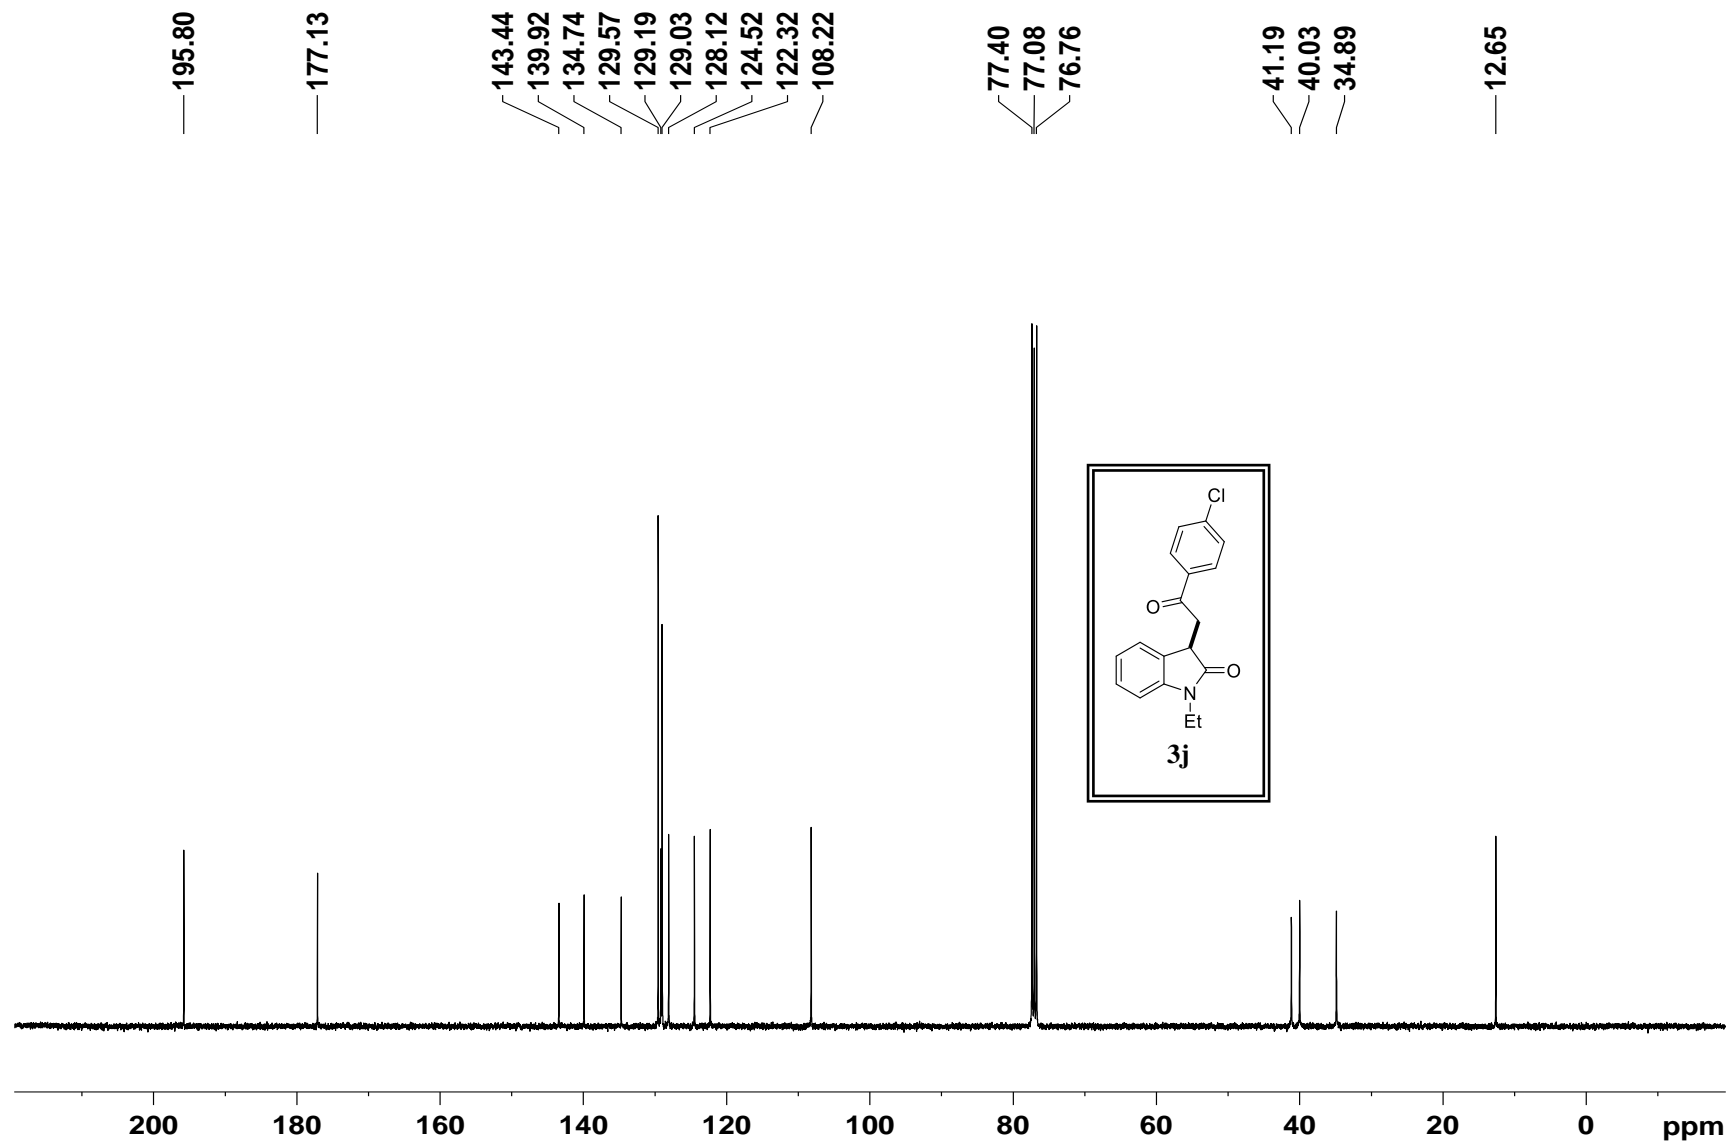

<sup>1</sup>H NMR spectrum of **3k**

apr-558 PROTON CDC13 2/12/2019

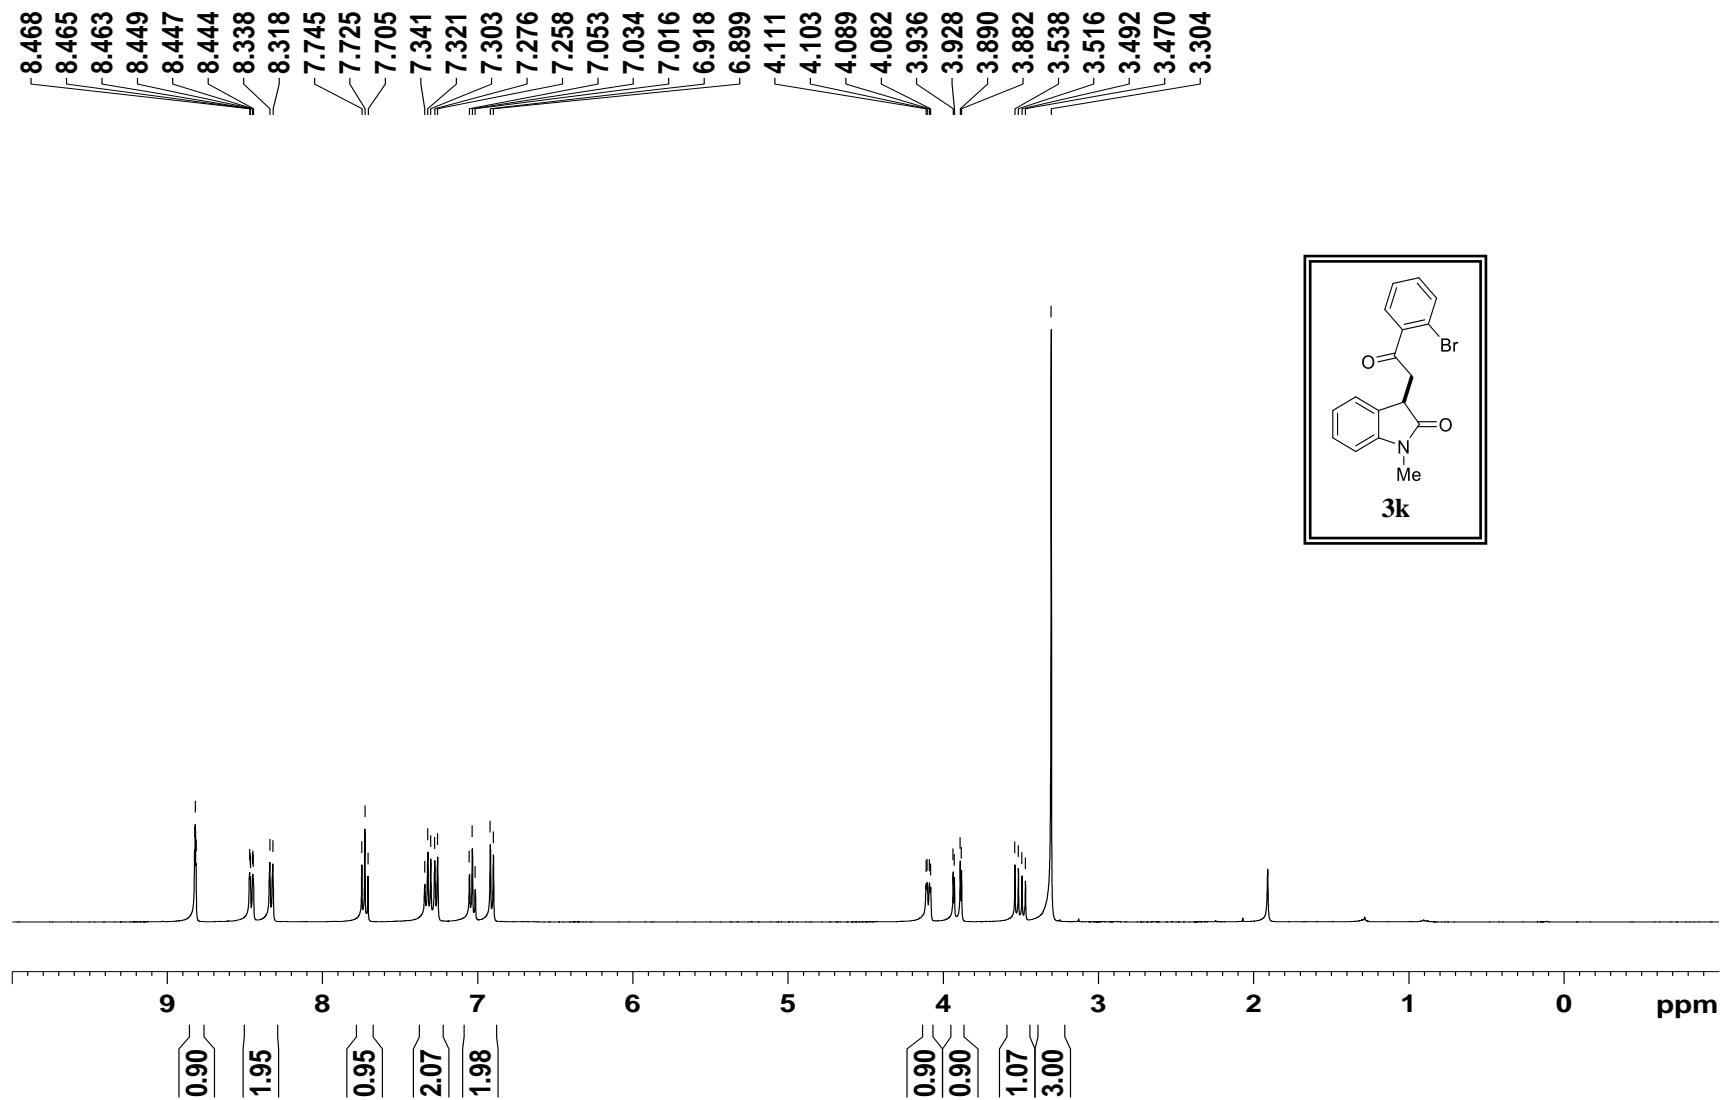

<sup>13</sup>C NMR spectrum of **3k**

apr-558 C13CPD CDC13 2/12/2019

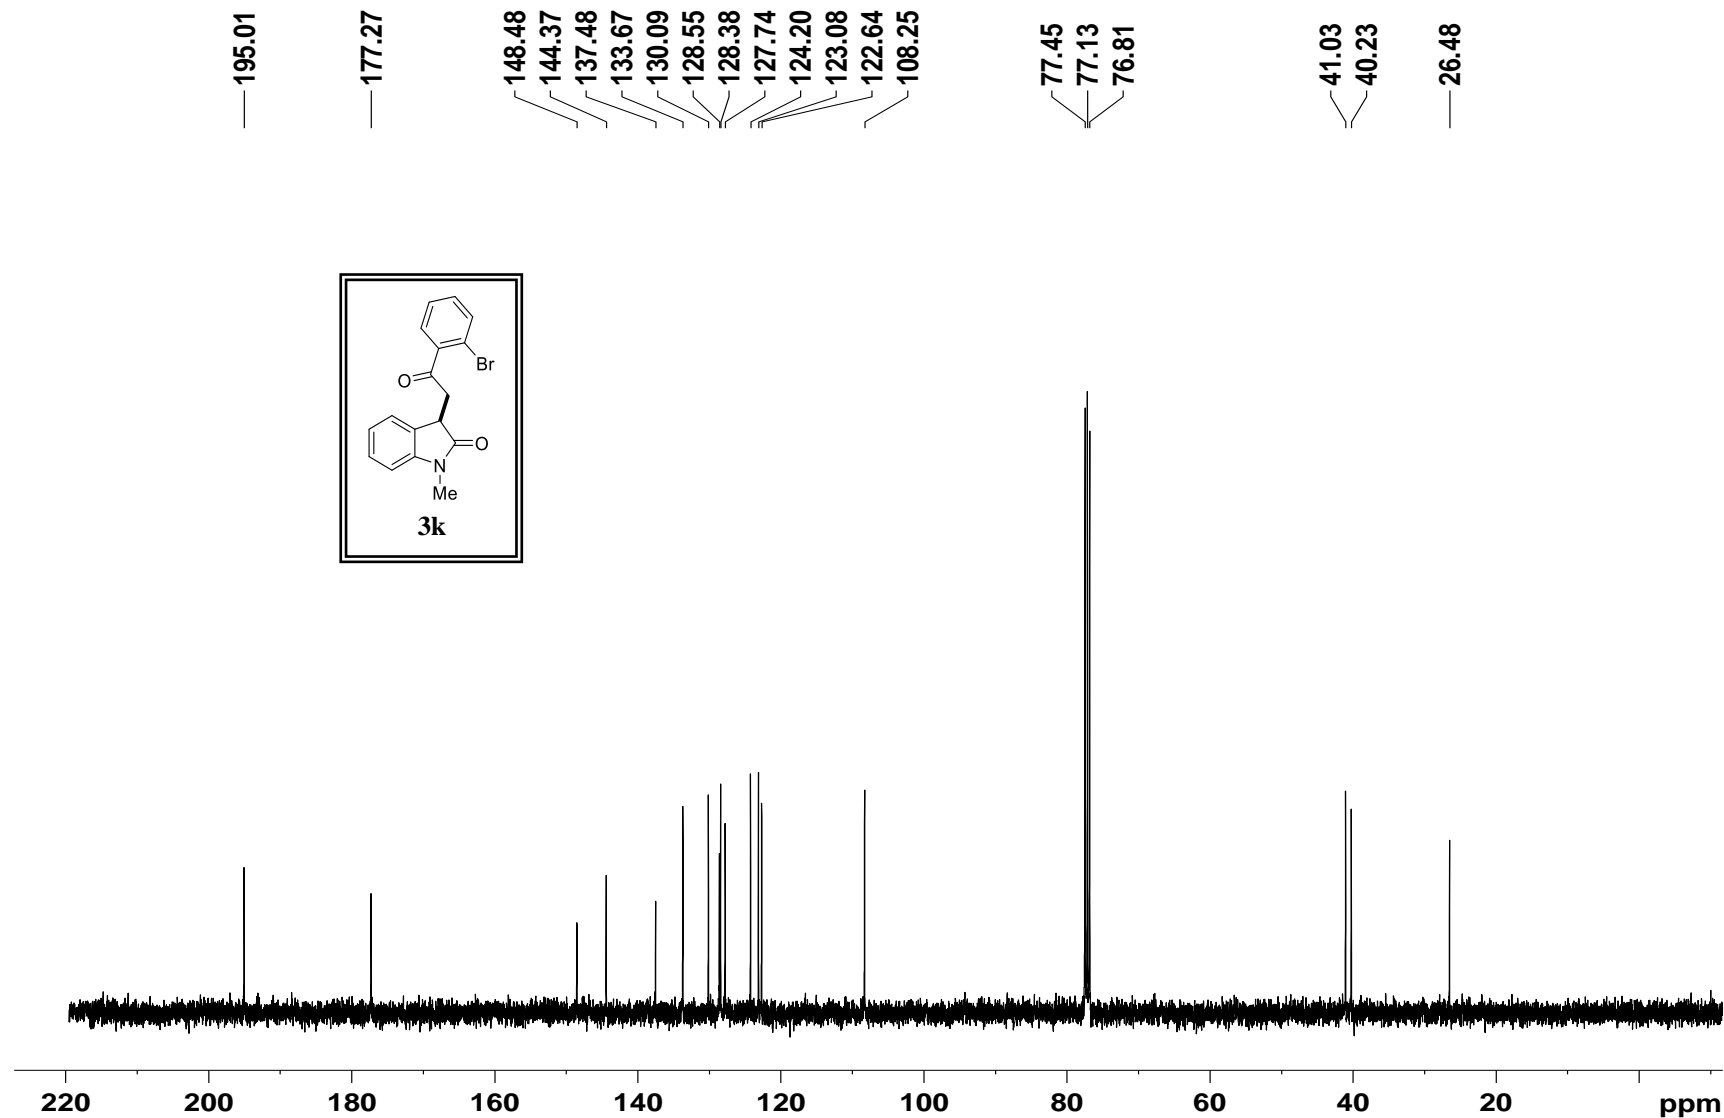



<sup>1</sup>H NMR spectrum of **31**

apr-45 PROTON CDC13 19/9/2017

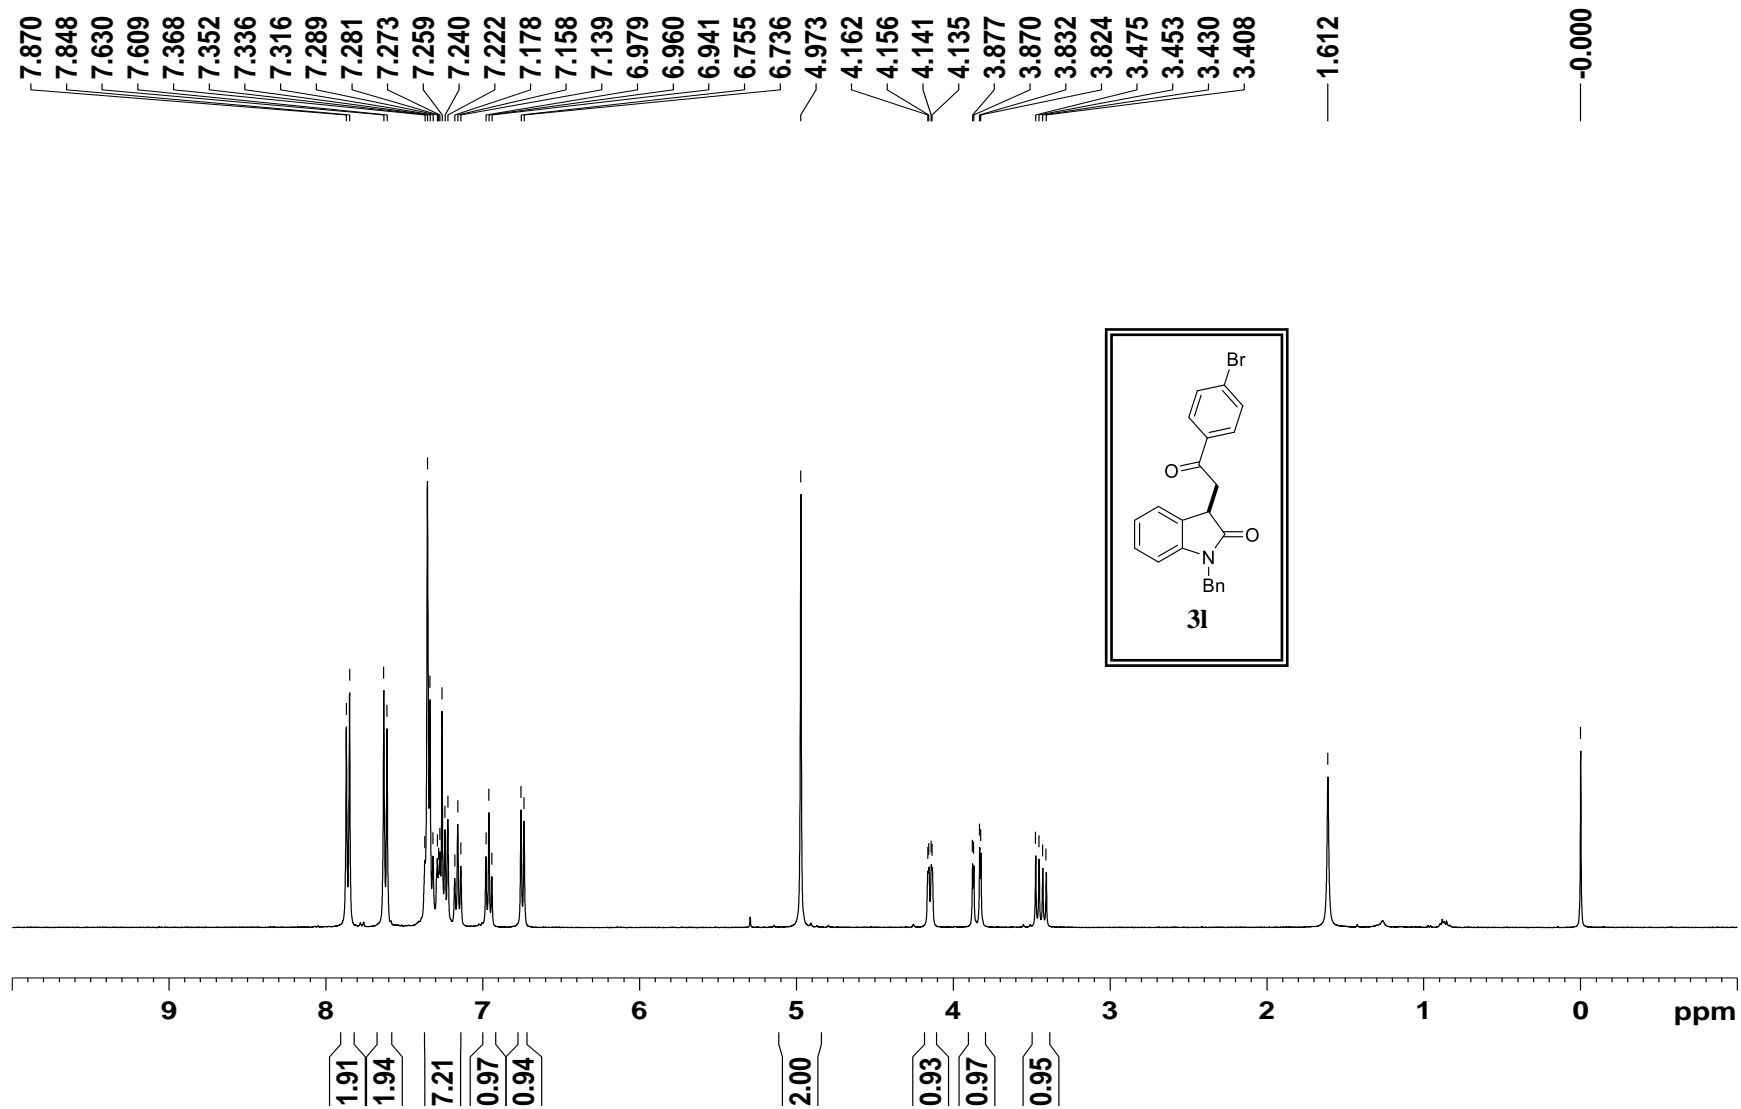

<sup>13</sup>C NMR spectrum of **3l**

apr-45 C13CPD CDC13 19/9/2017

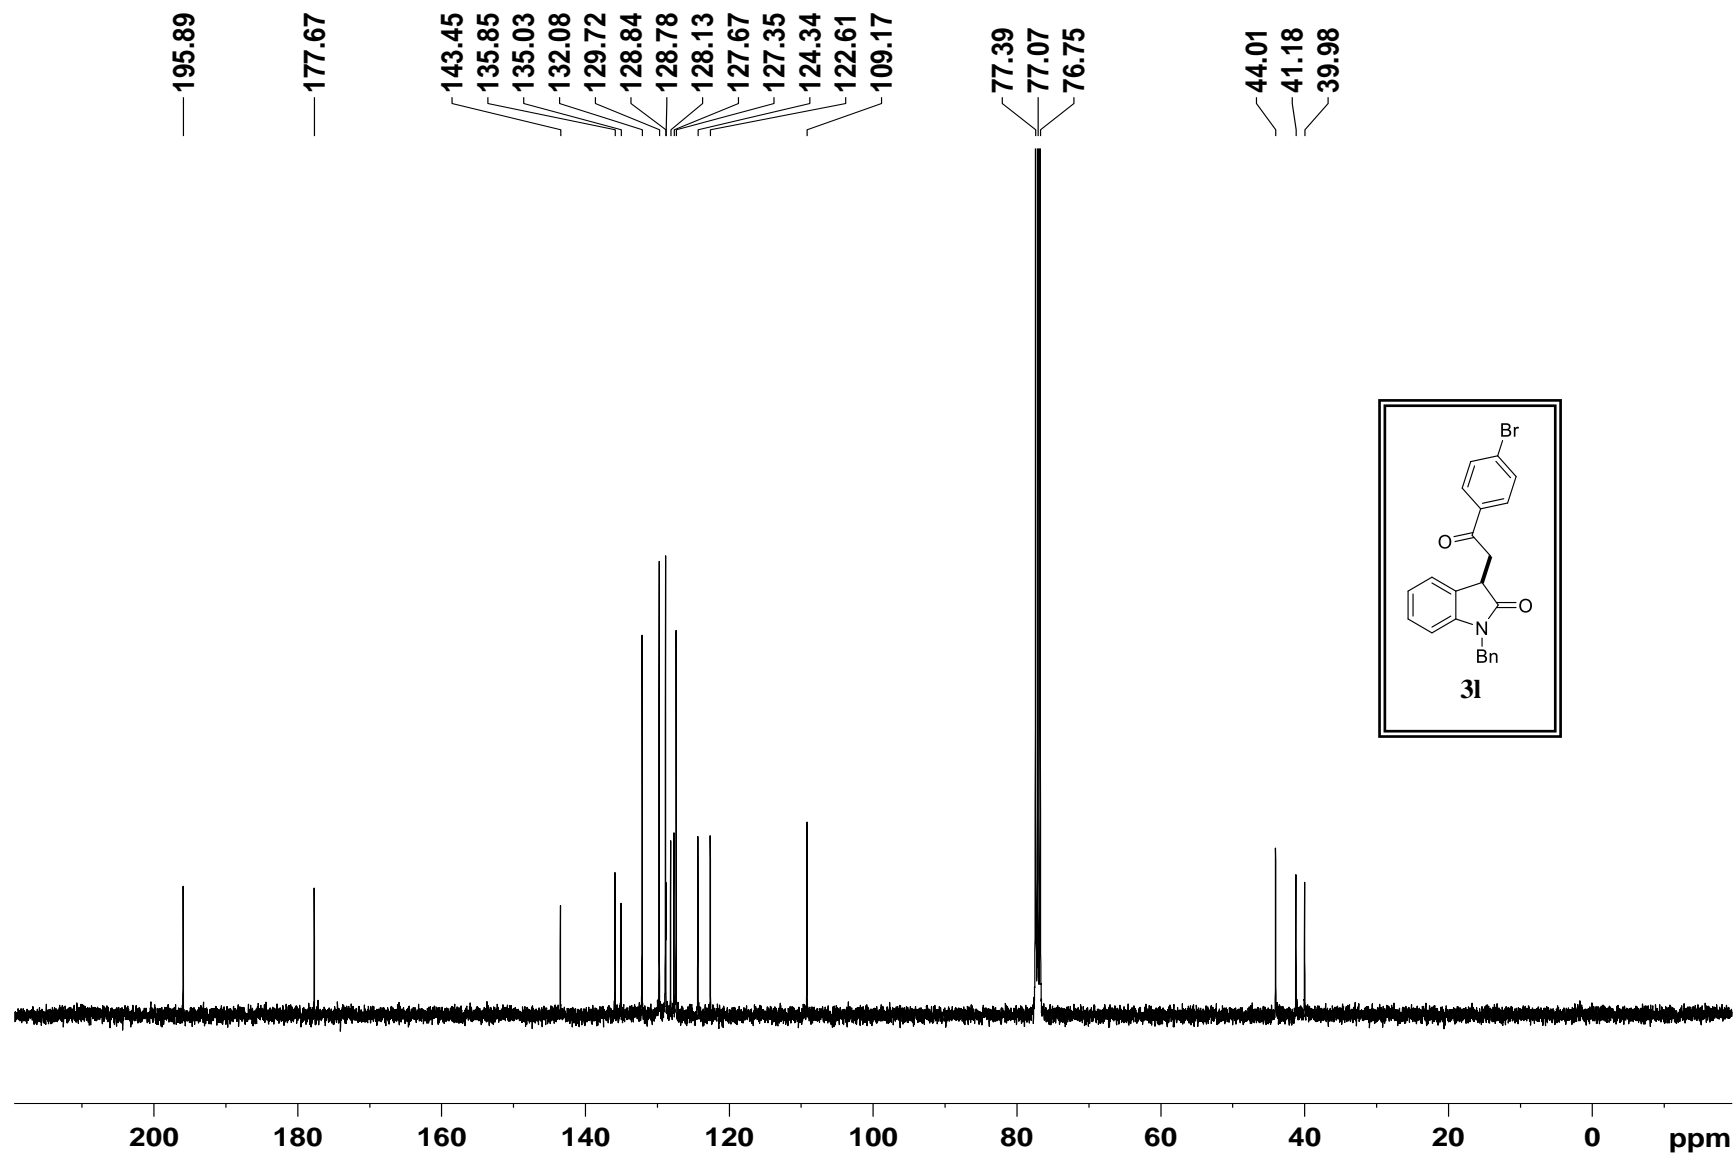

<sup>1</sup>H NMR spectrum of **3m**

apr-562 PROTON CDC13 2/12/2019

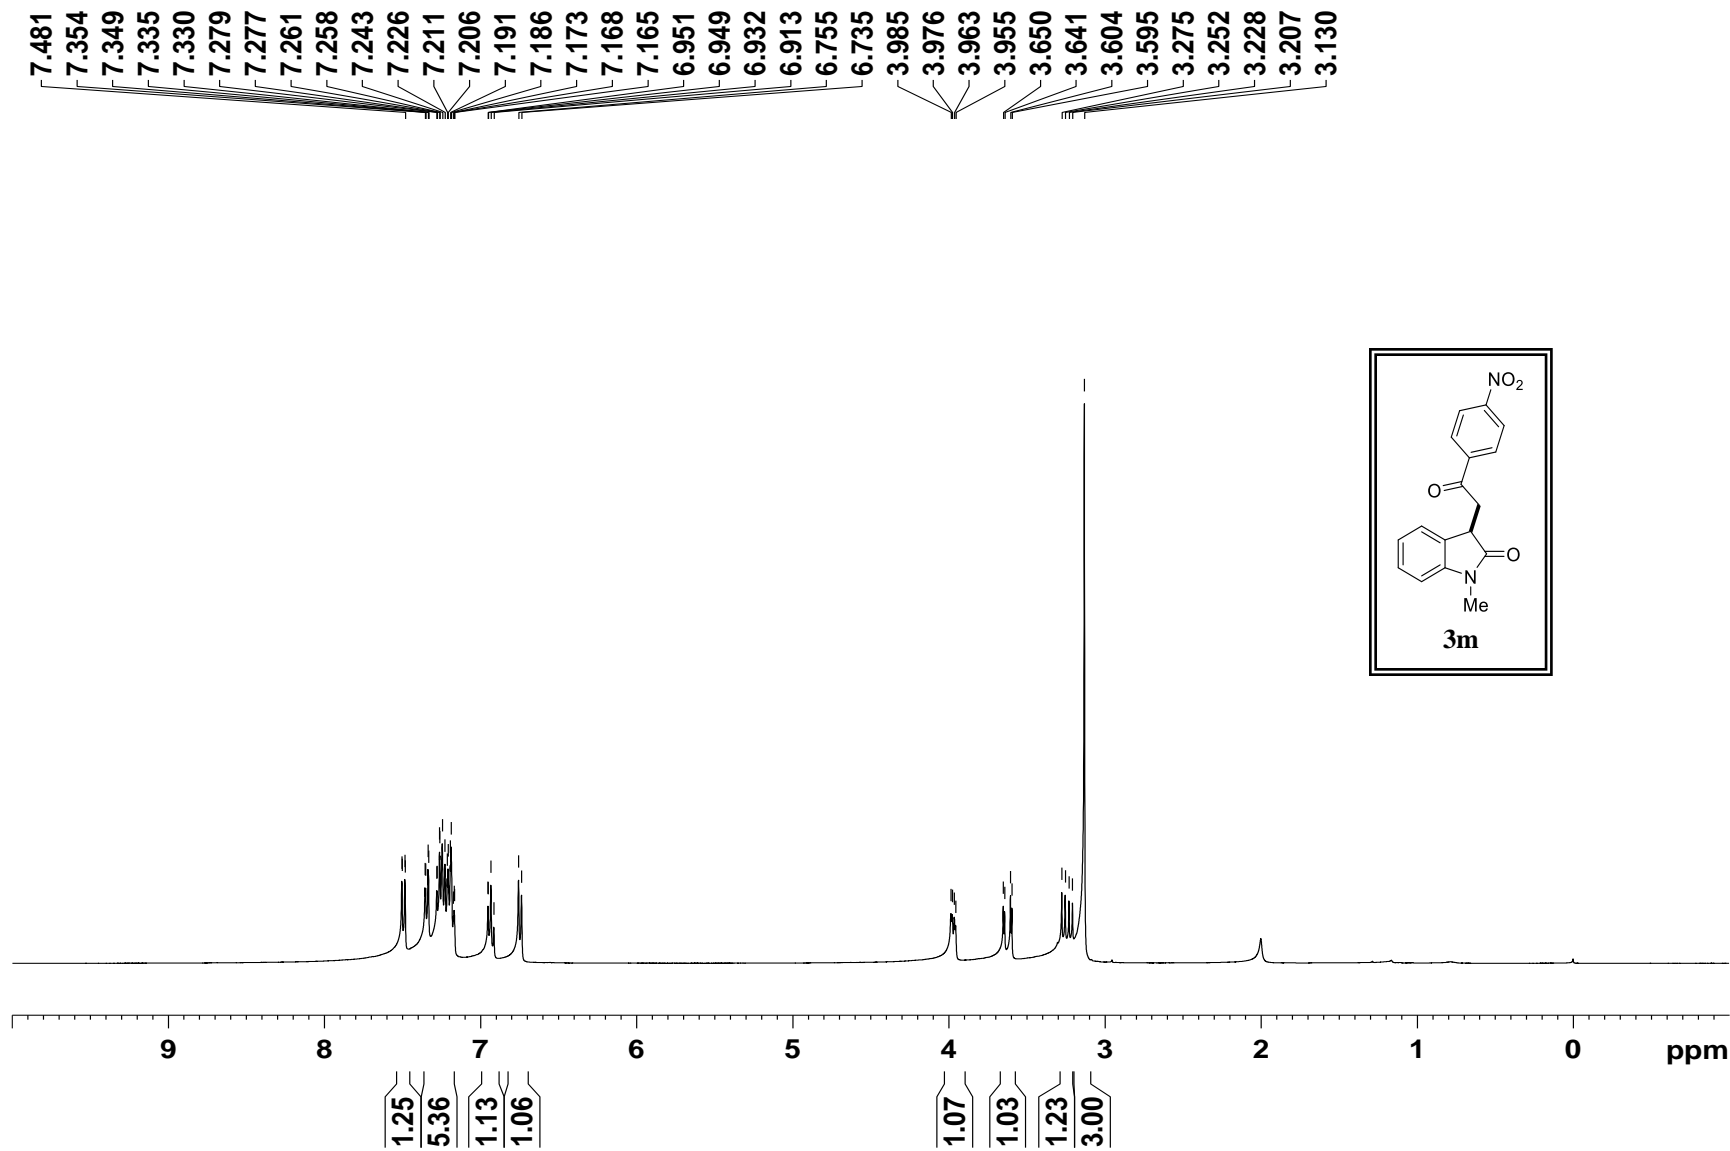

<sup>13</sup>C NMR spectrum of **3m**

apr-562 C13CPD CDC13 2/12/2019

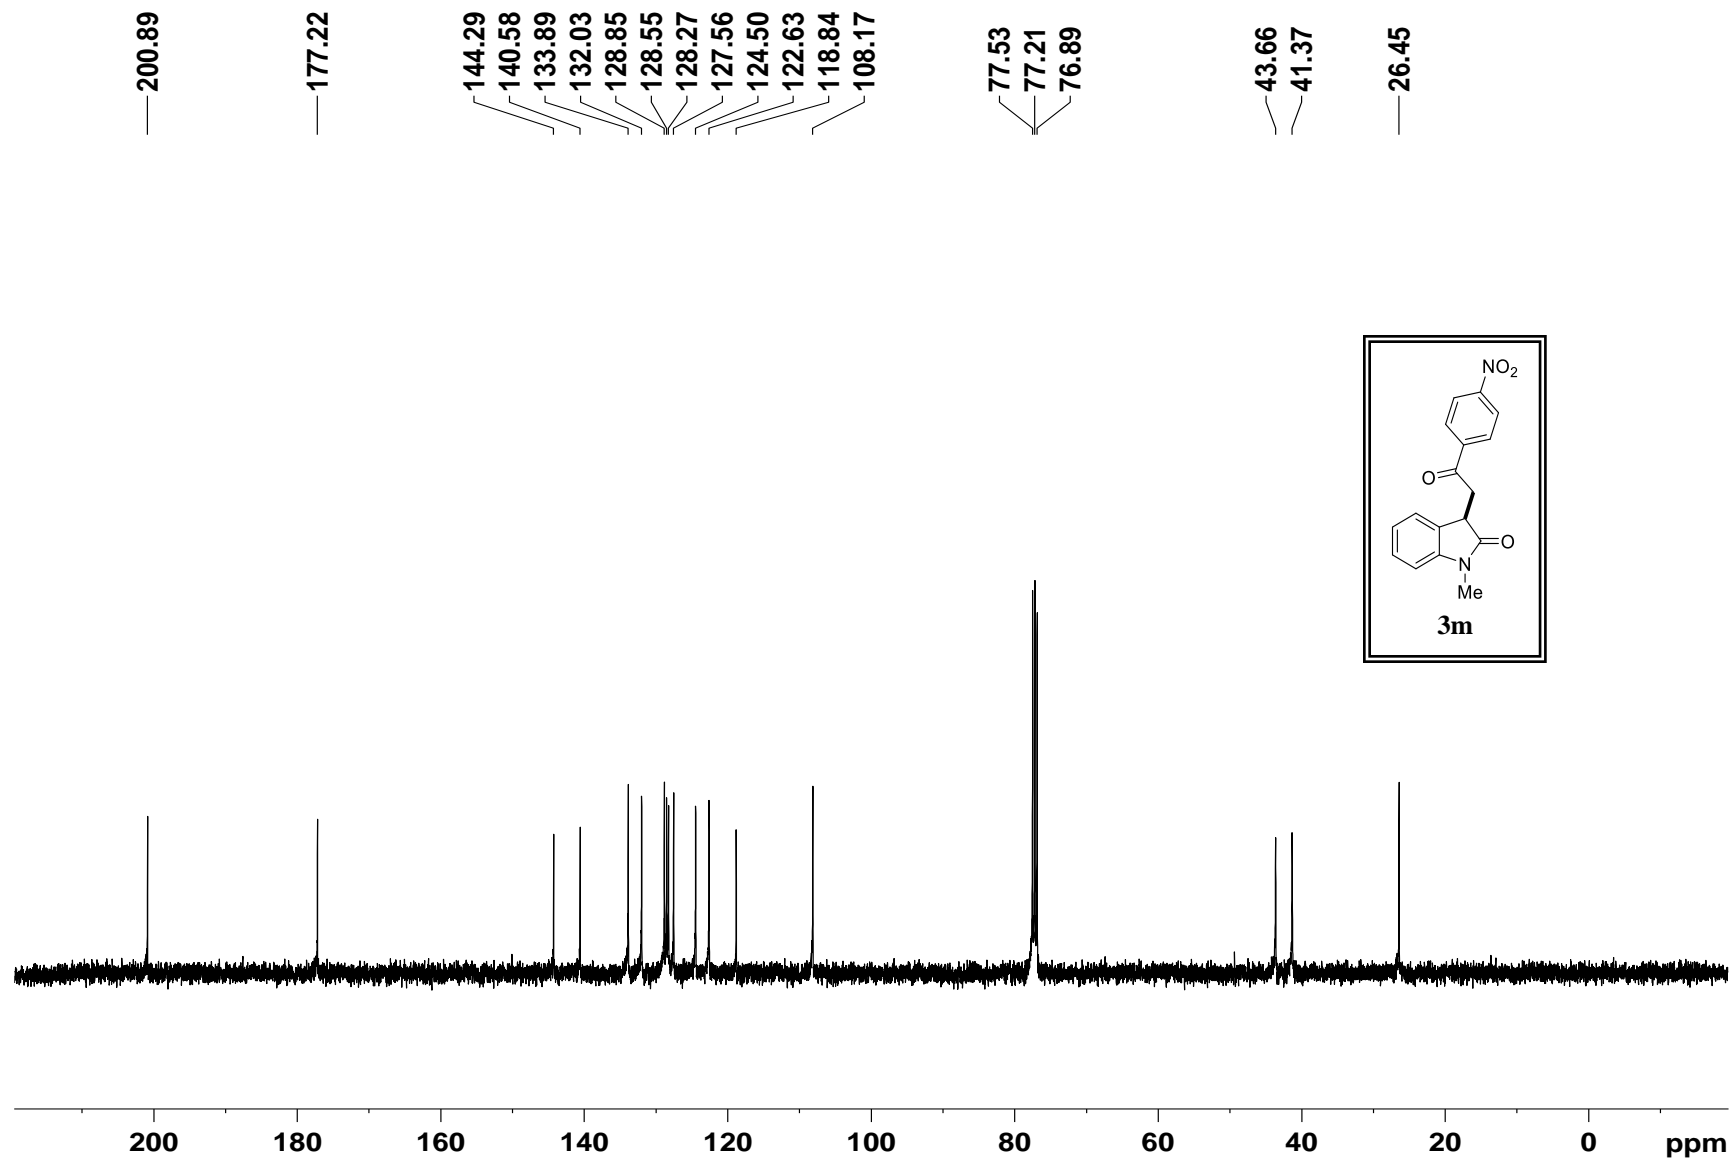

<sup>1</sup>H NMR spectrum of **3n**

apr-343 PROTON CDC13 11/10/2018

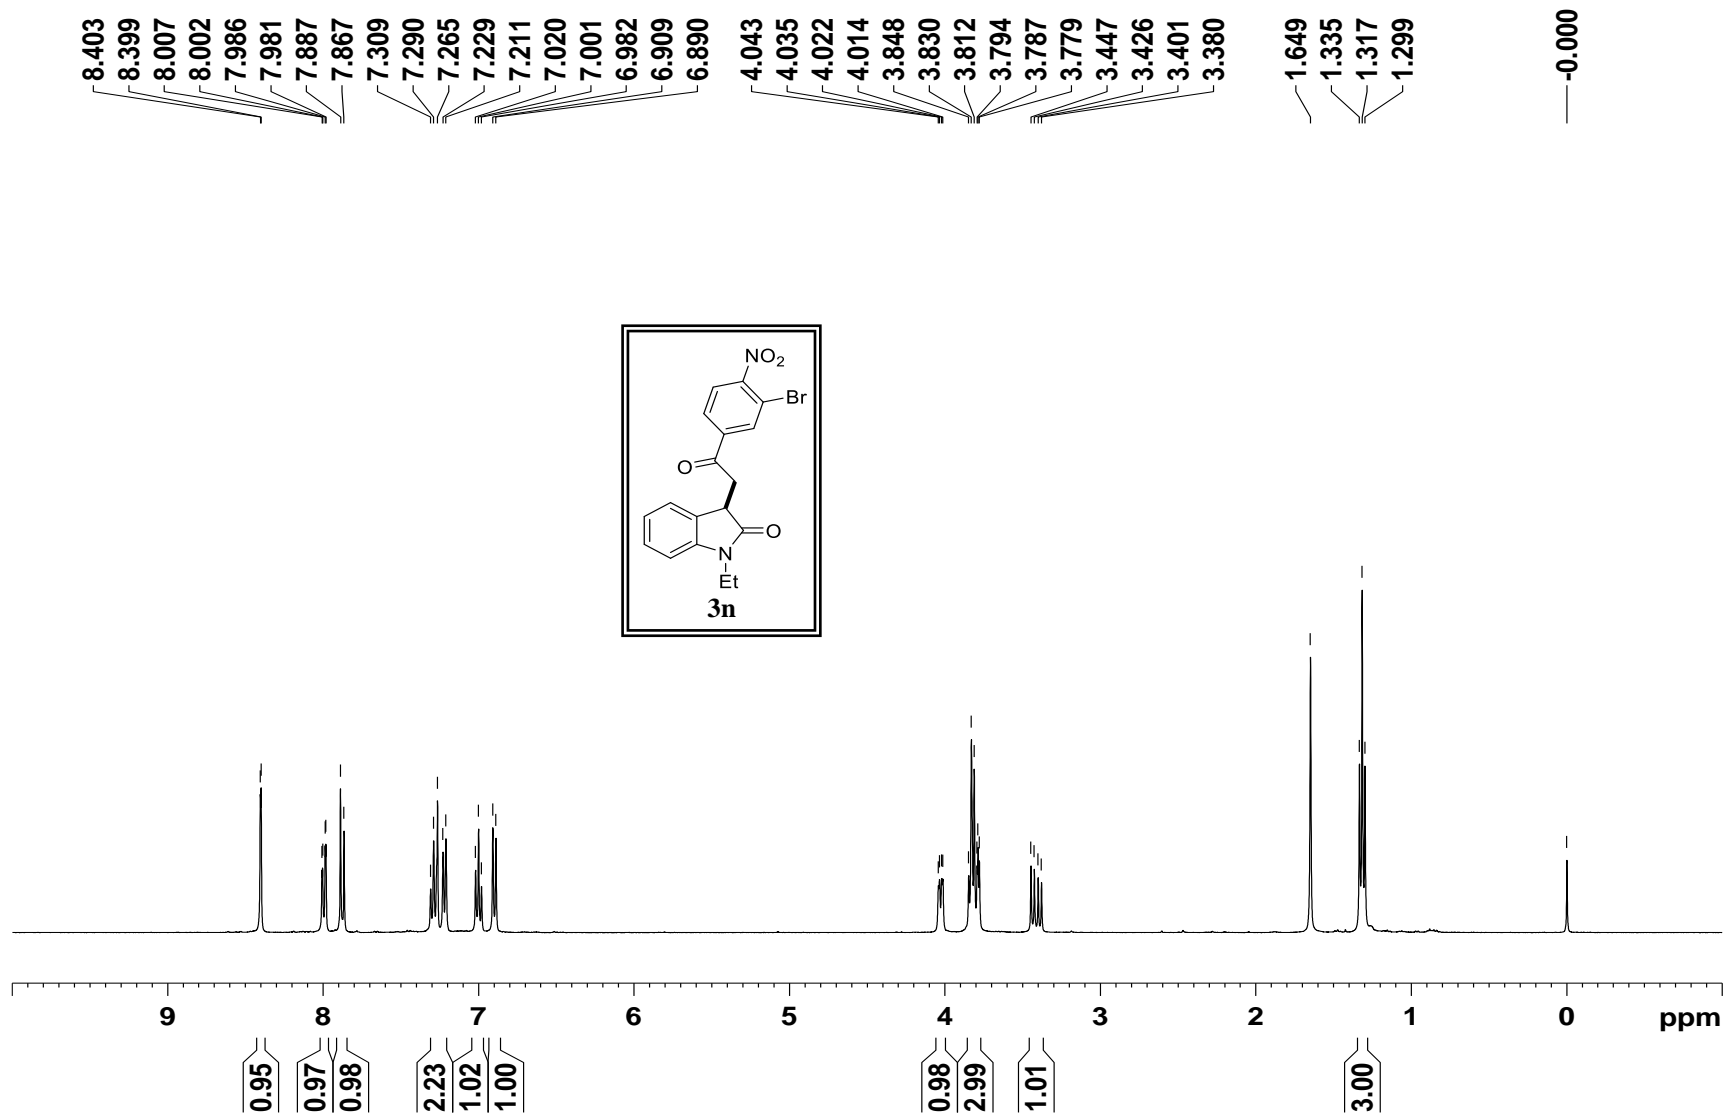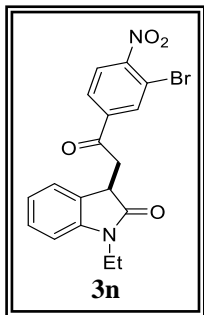

<sup>13</sup>C NMR spectrum of **3n**

apr-343 C13CPD CDC13 11/10/2018

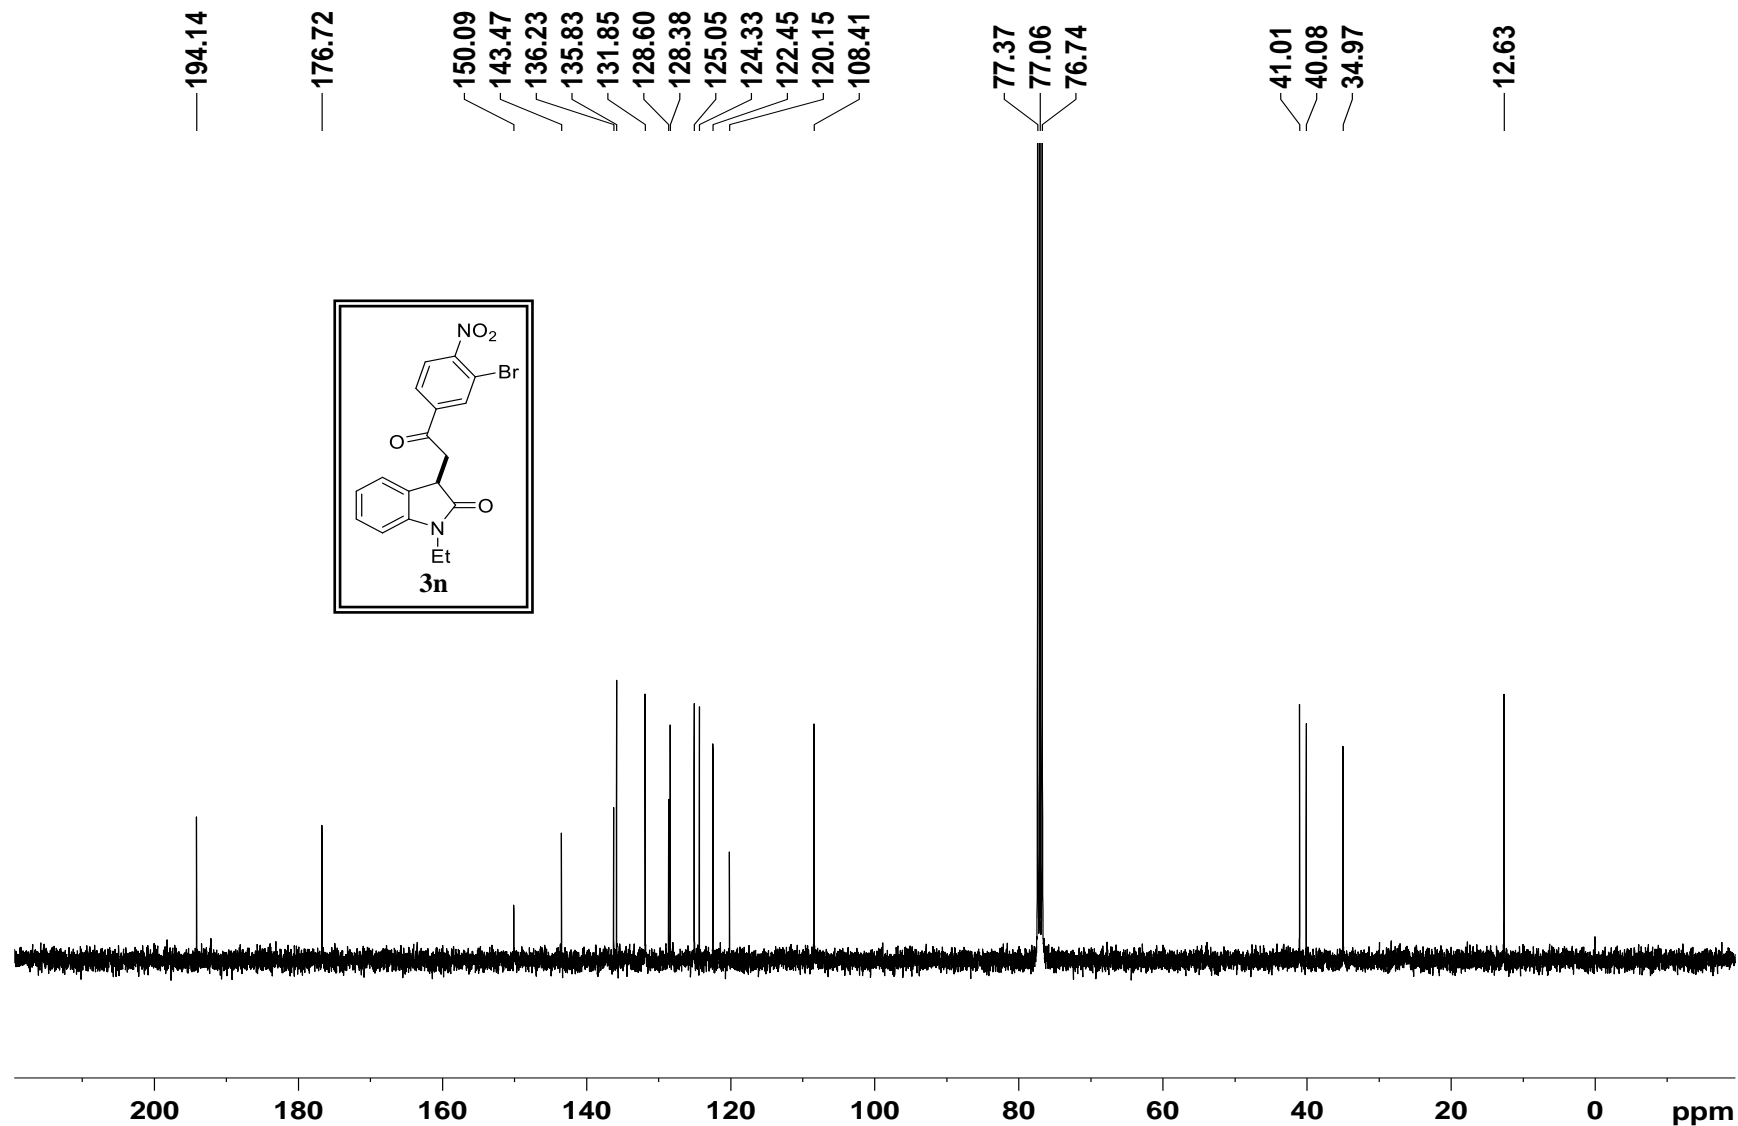

<sup>1</sup>H NMR spectrum of **3p**

apr-566 PROTON CDC13 13/01/2020

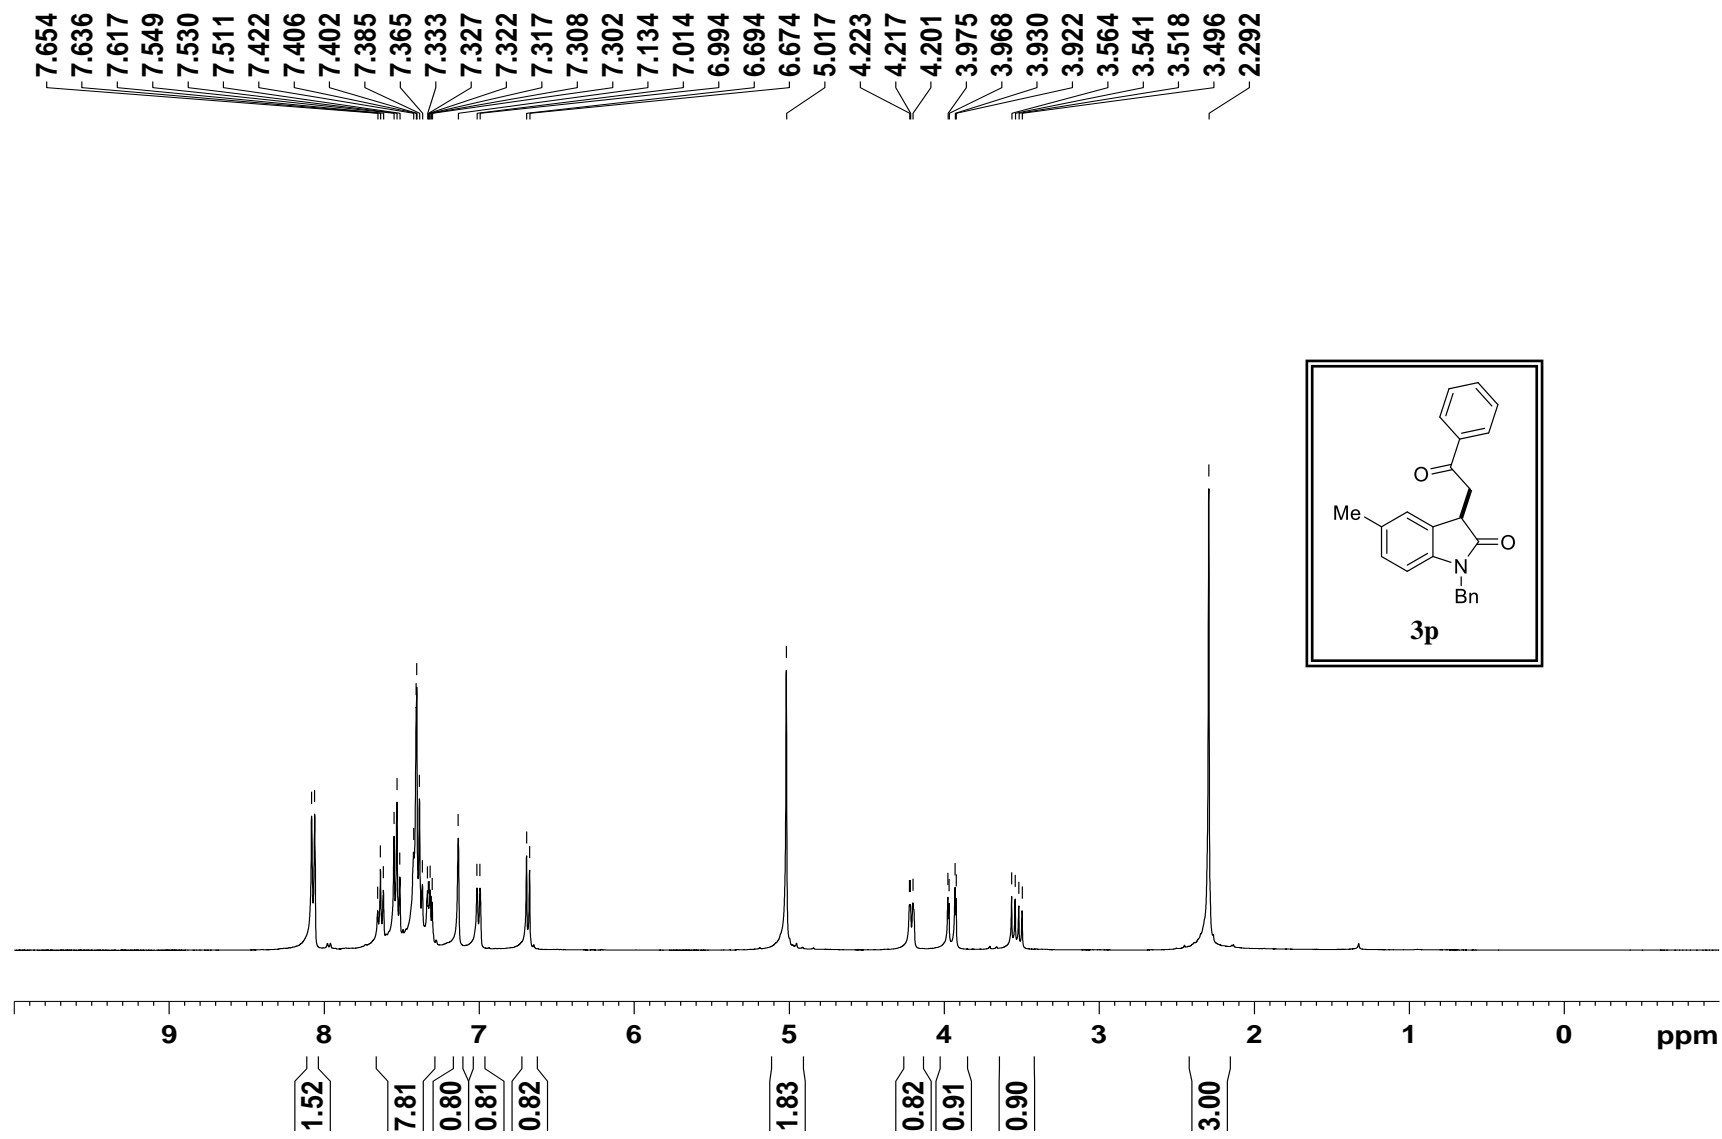

<sup>13</sup>C NMR spectrum of **3p**

apr566 C13CPD CDC13 24/01/2020

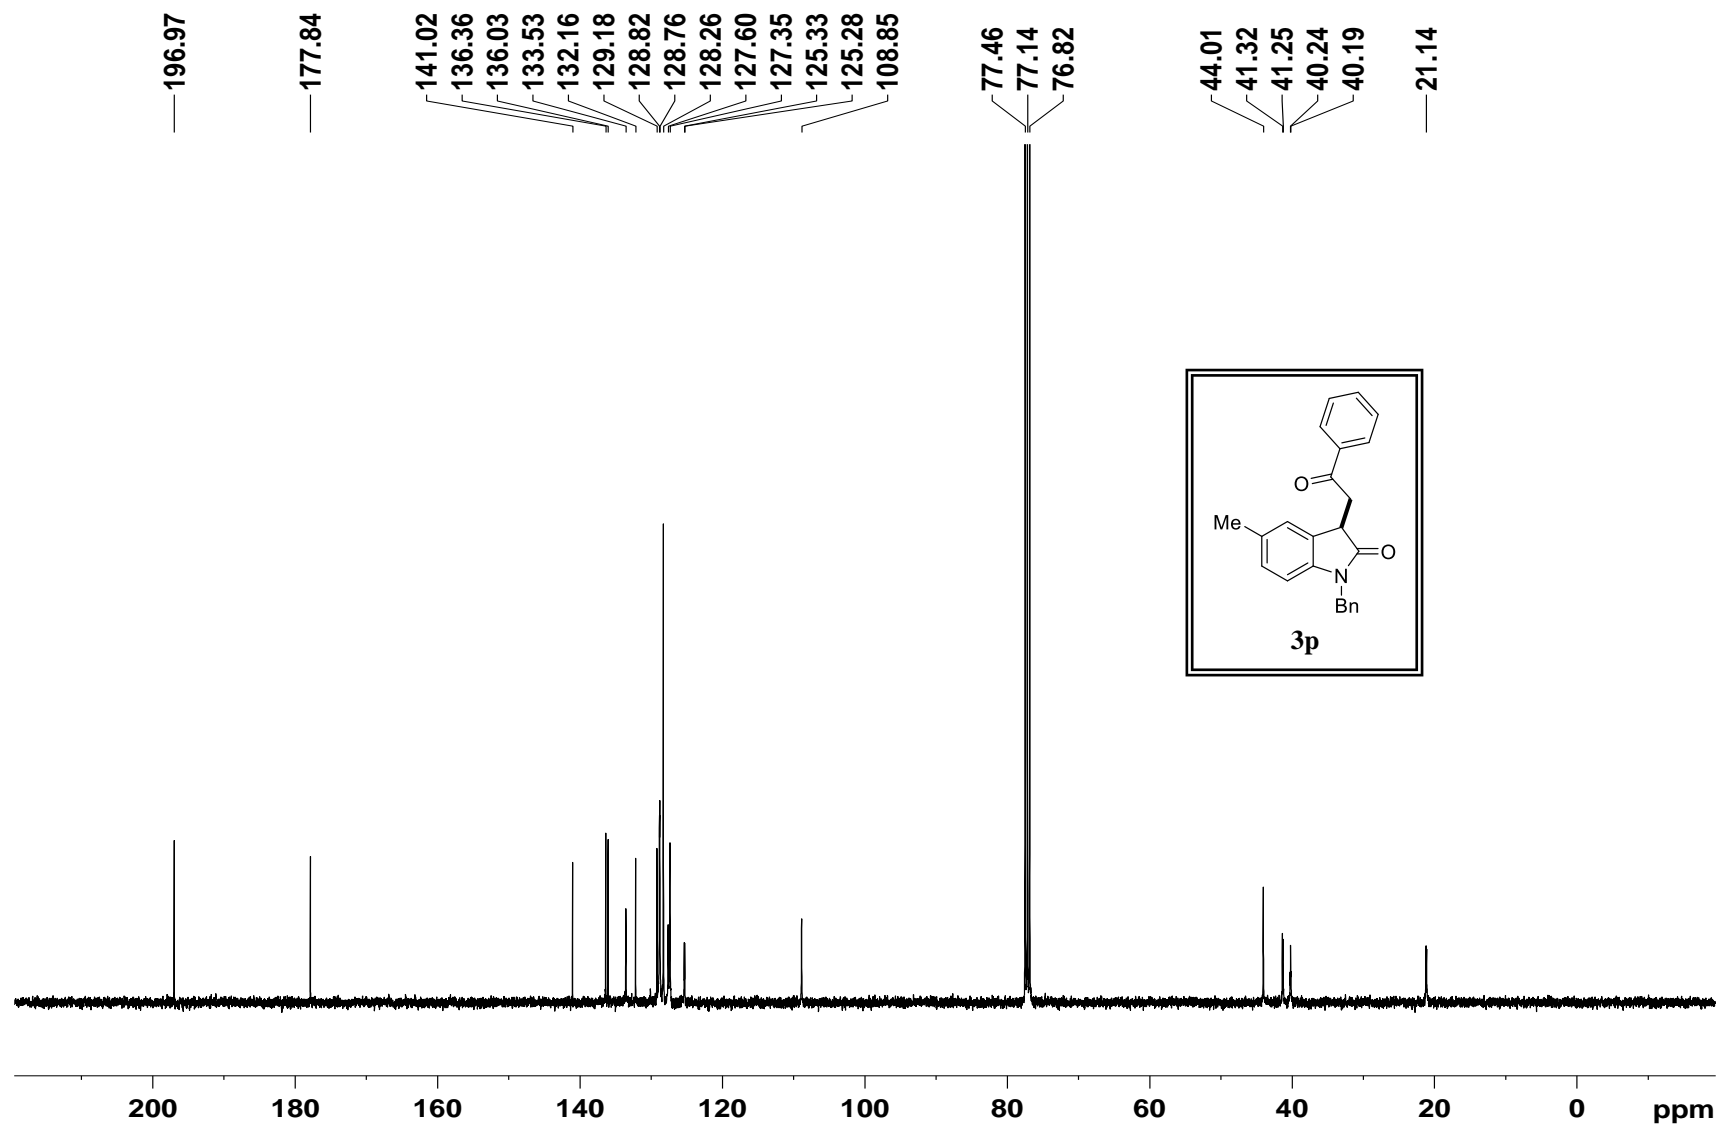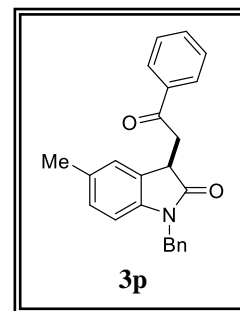



<sup>1</sup>H NMR spectrum of **3q**

apr-378 PROTON CDCl<sub>3</sub> 28/12/2018

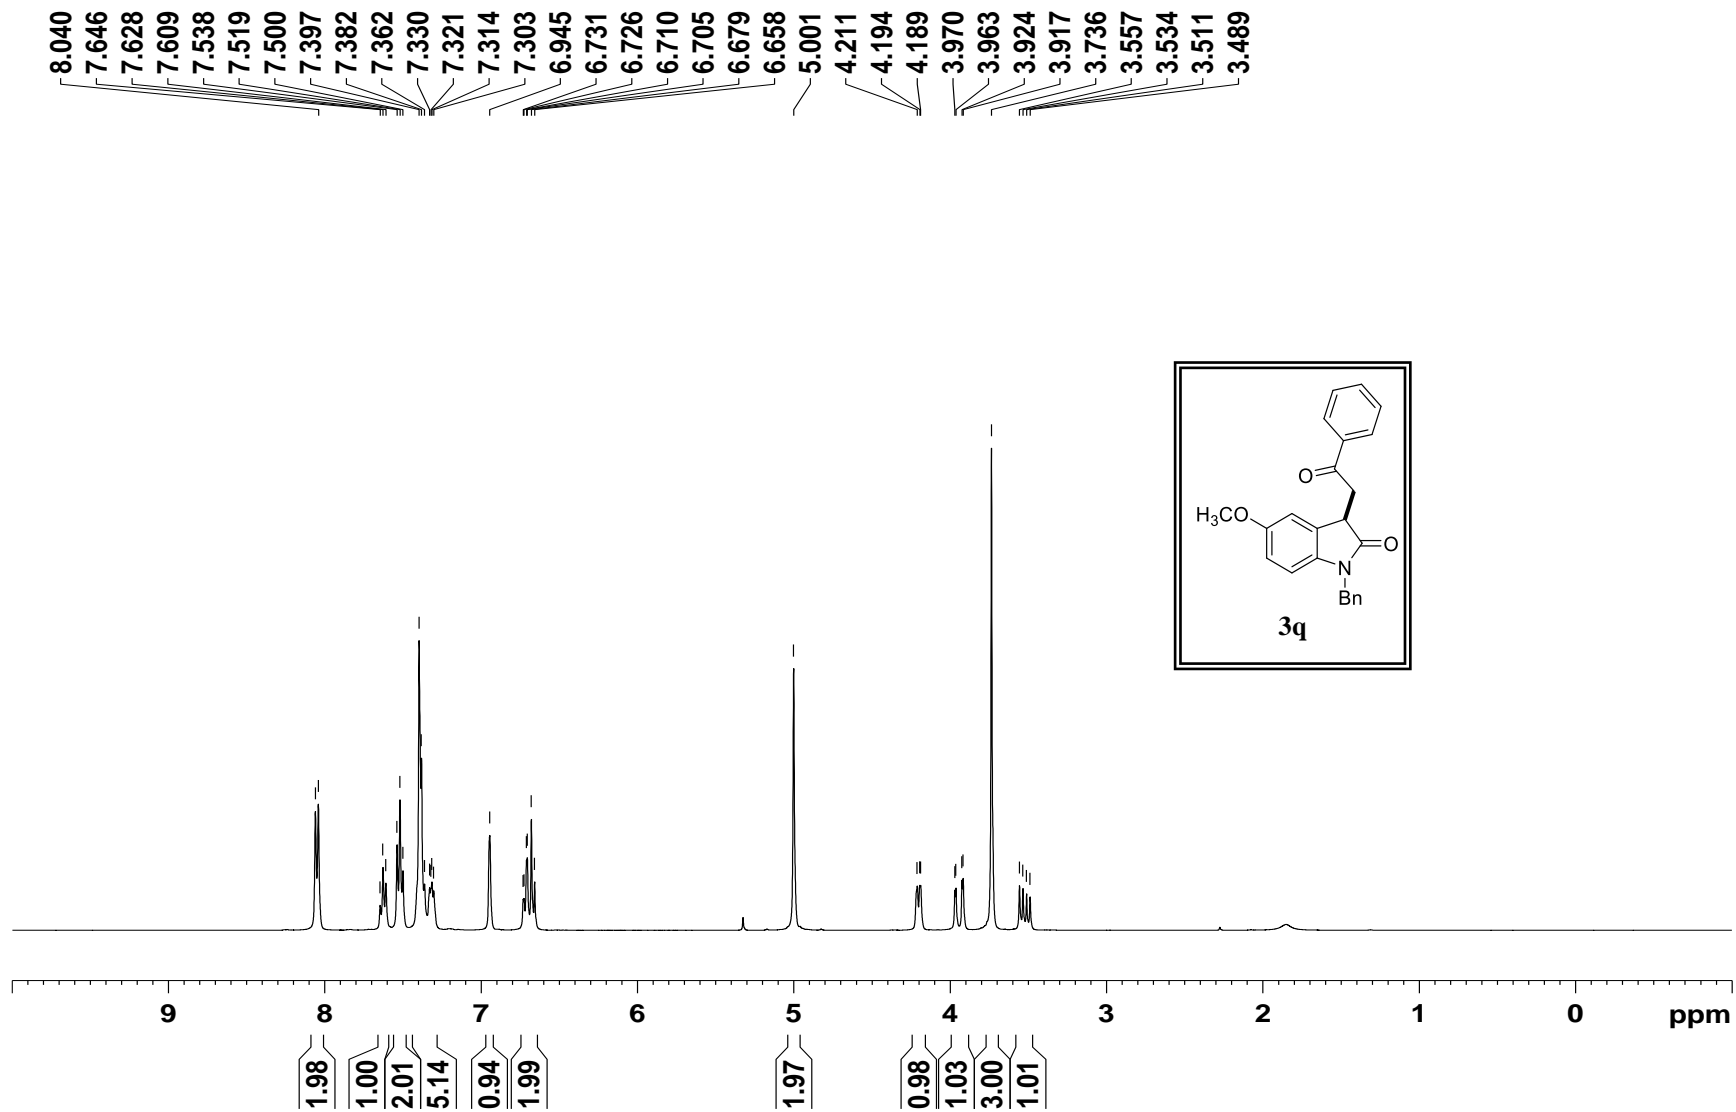

<sup>13</sup>C NMR spectrum of **3q**

apr-378 C13CPD CDC13 28/12/2018

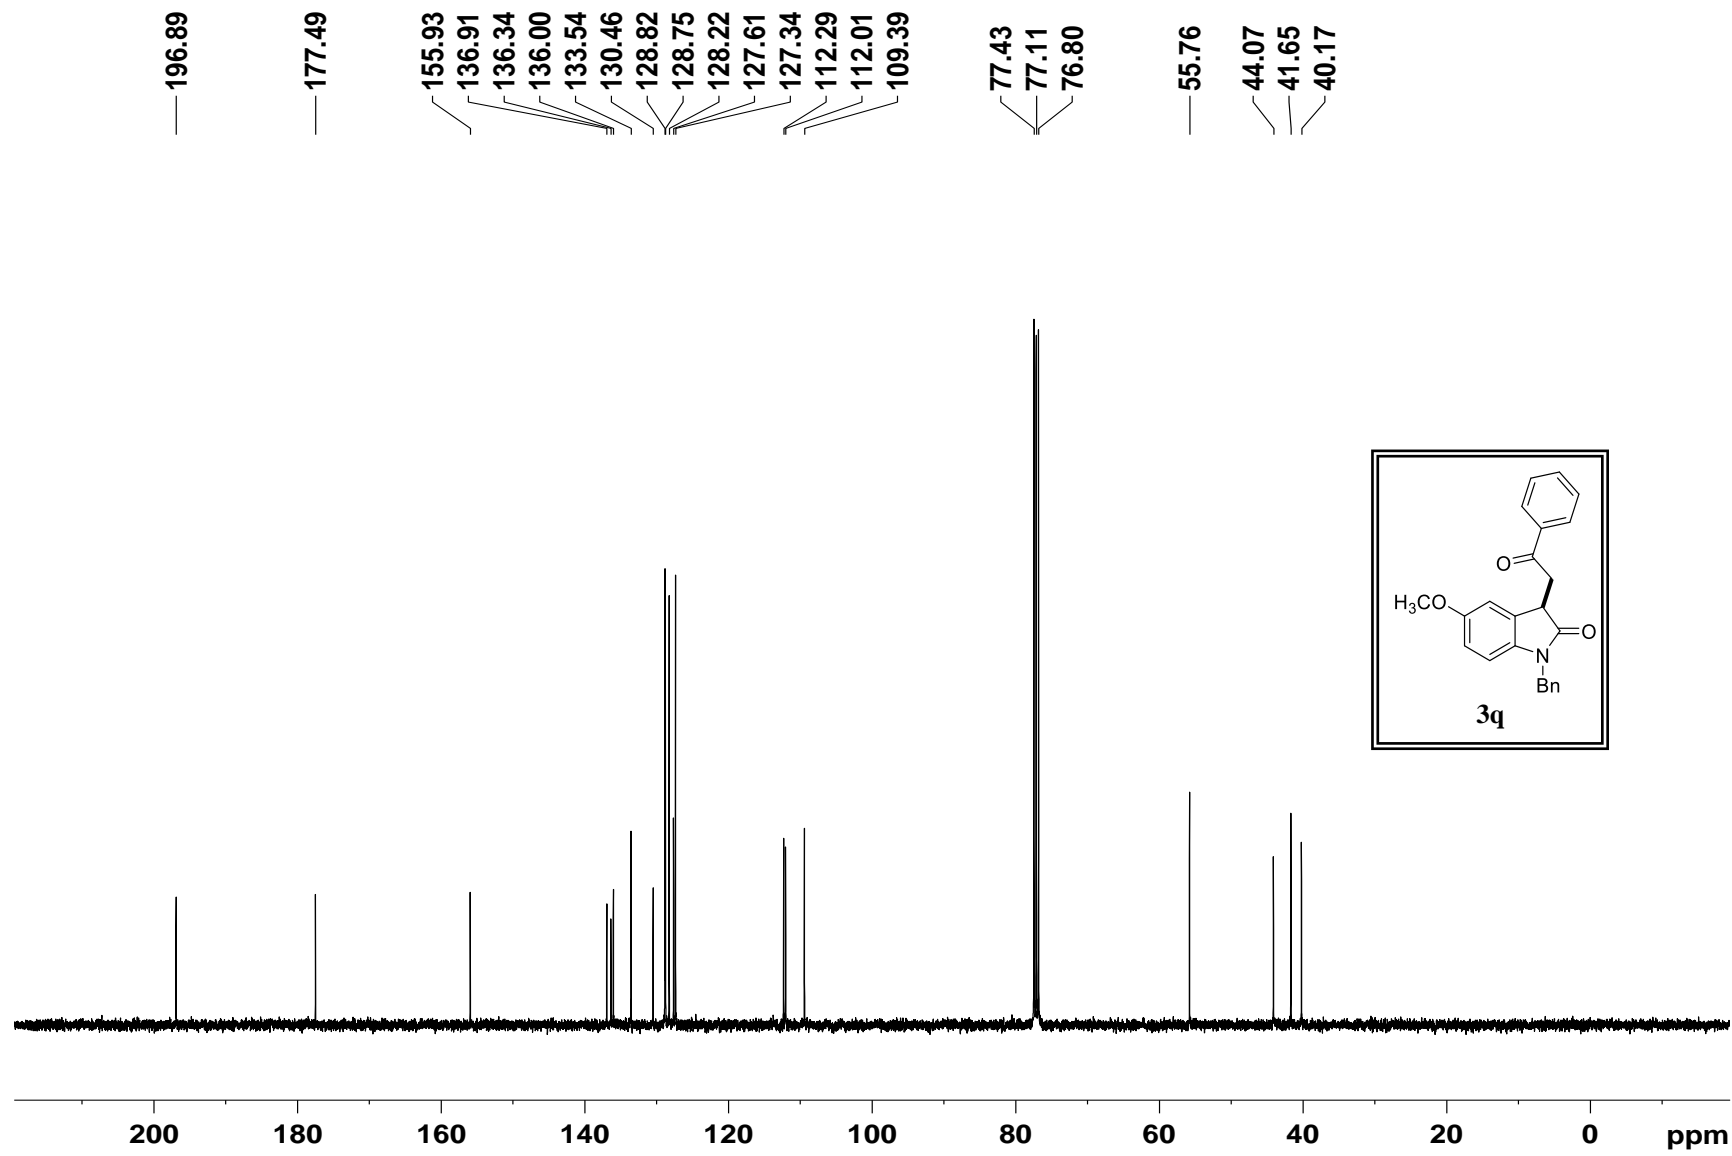

COSY spectrum of **3q**

apr-378 COSYGPSW CDC13 28/12/2018

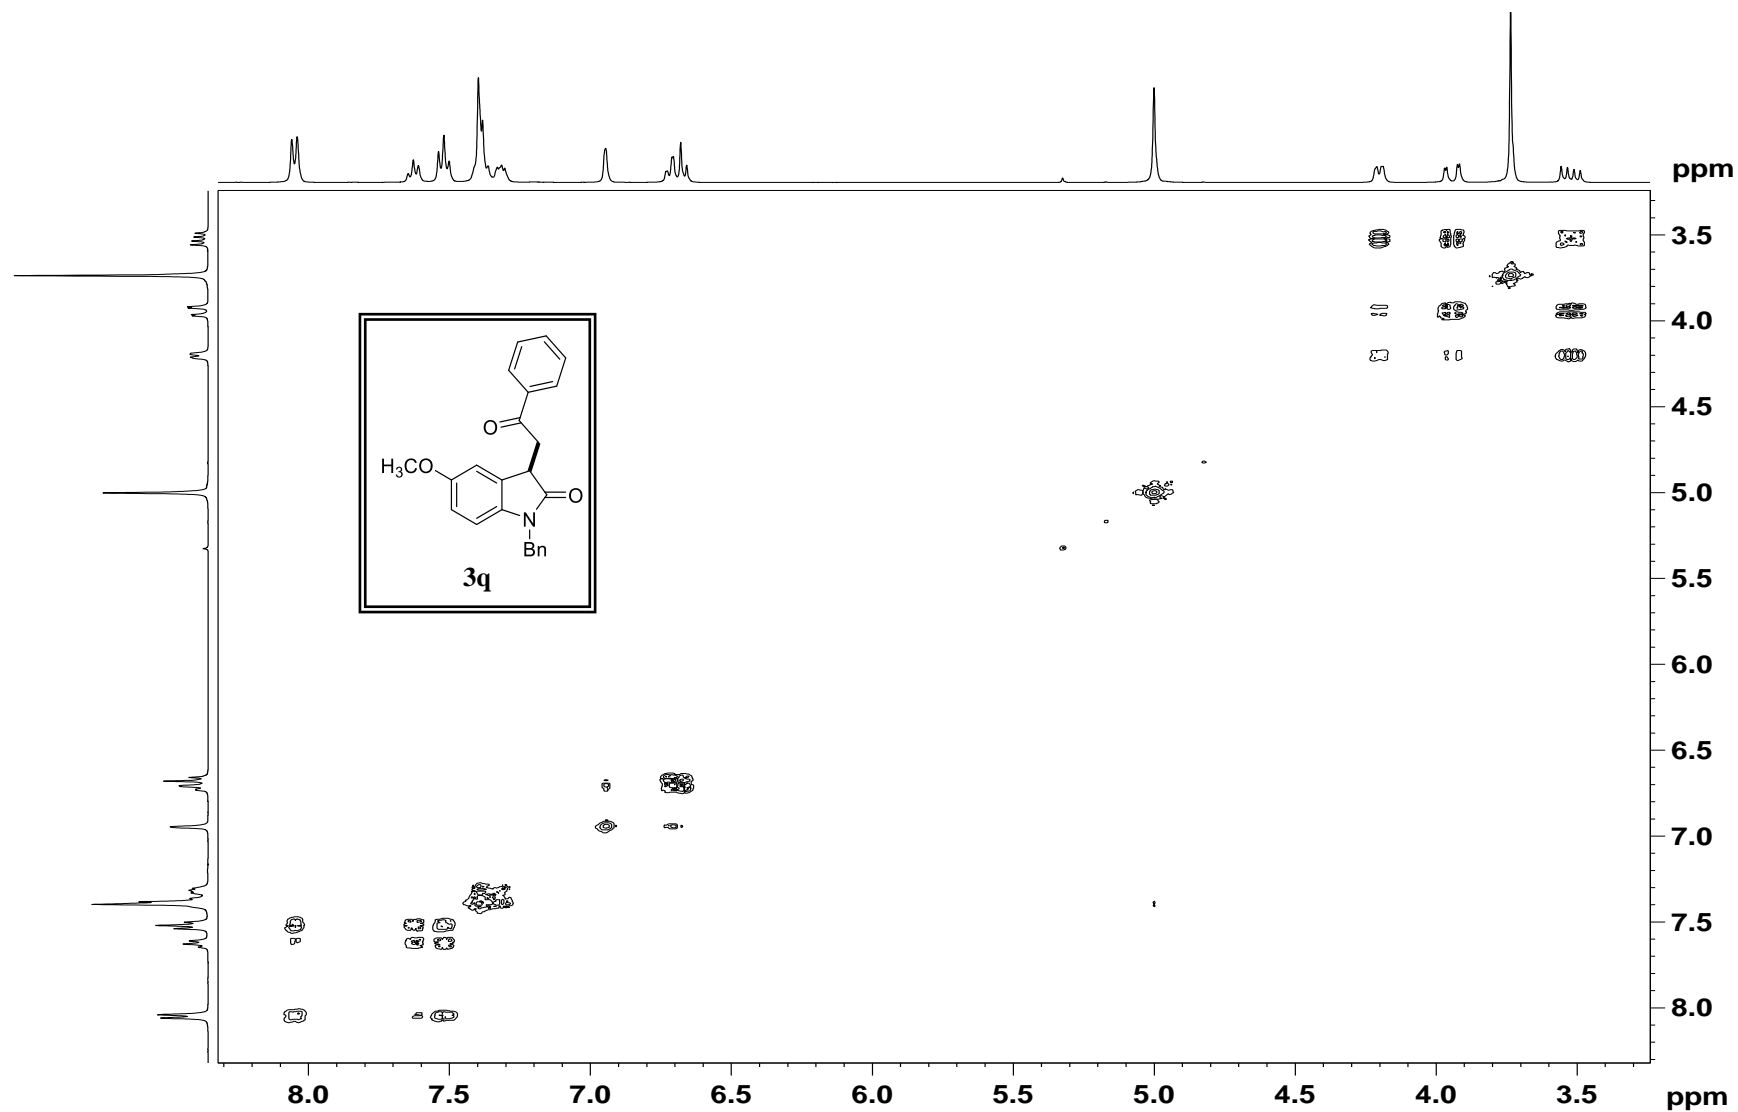

HSQC spectrum of **3q**

apr-378 HSQCGP CDCl3 28/12/20118

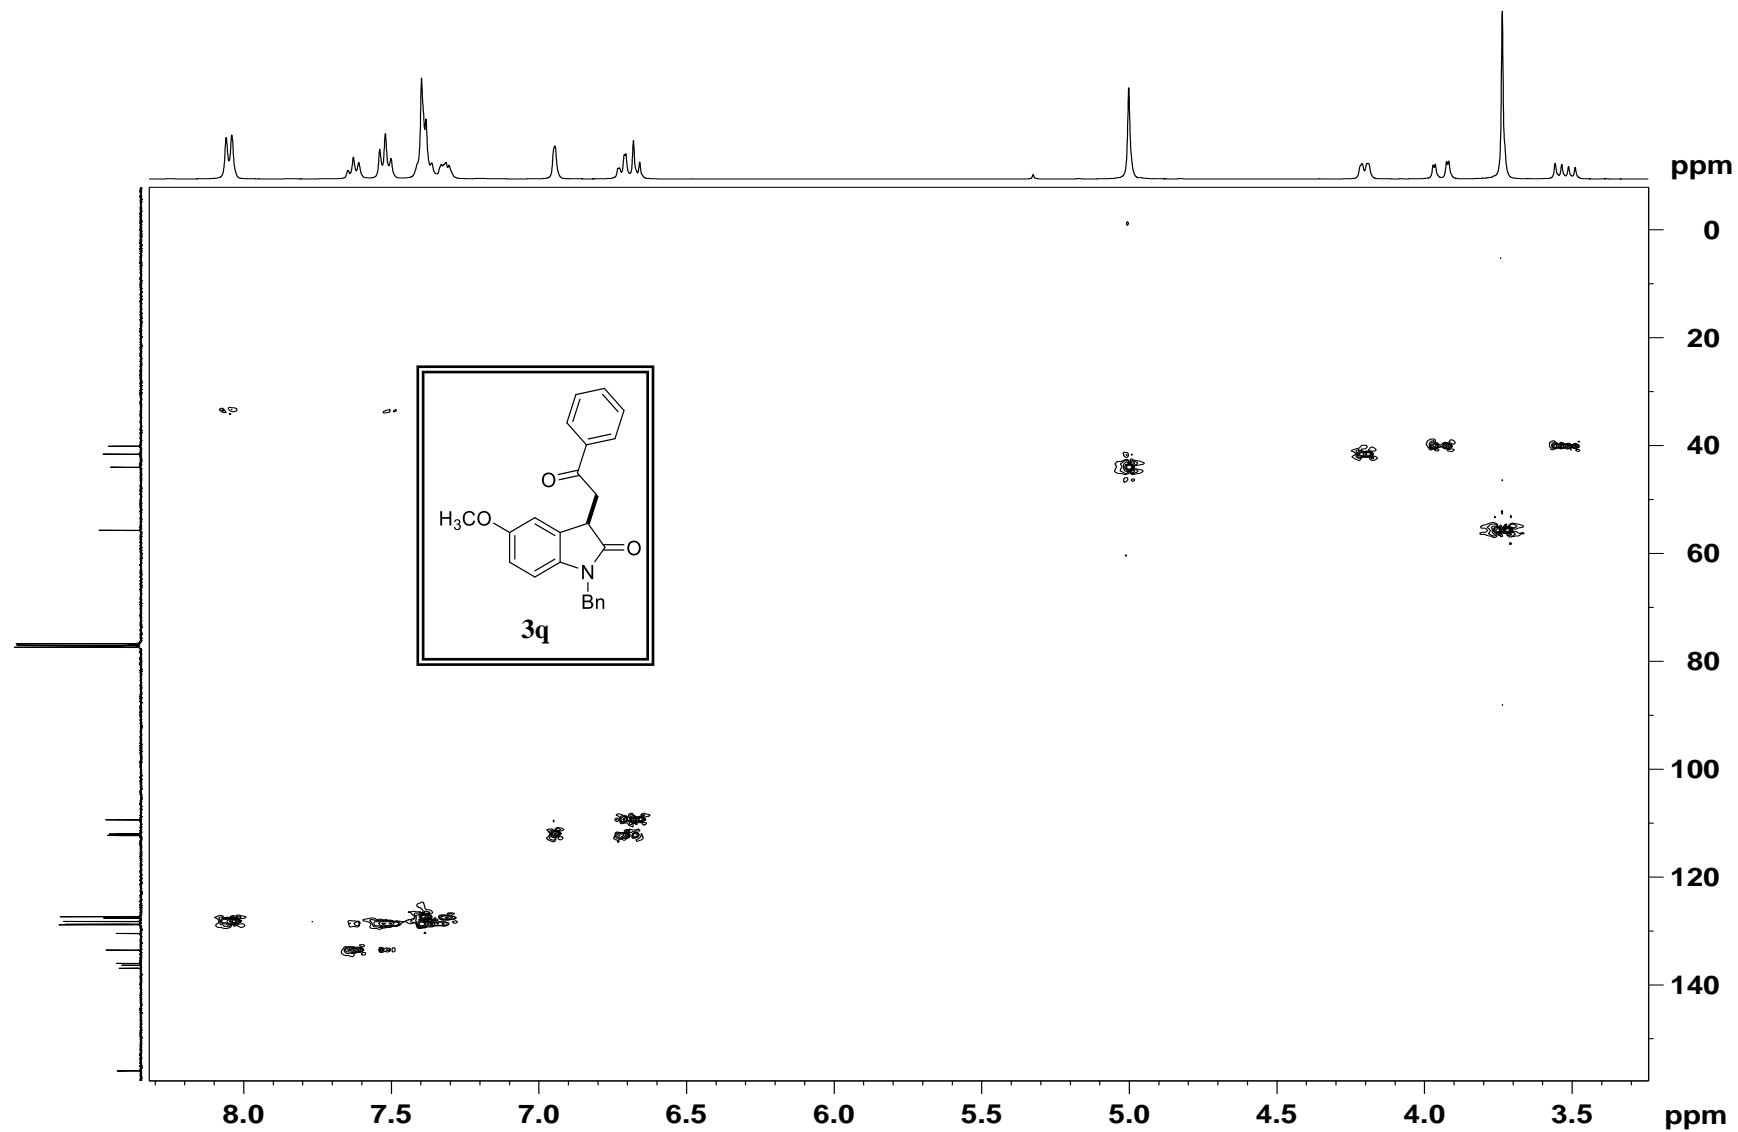

<sup>1</sup>H NMR spectrum of **3r**

apr-403 PROTON CDCl<sub>3</sub> 9/7/2019

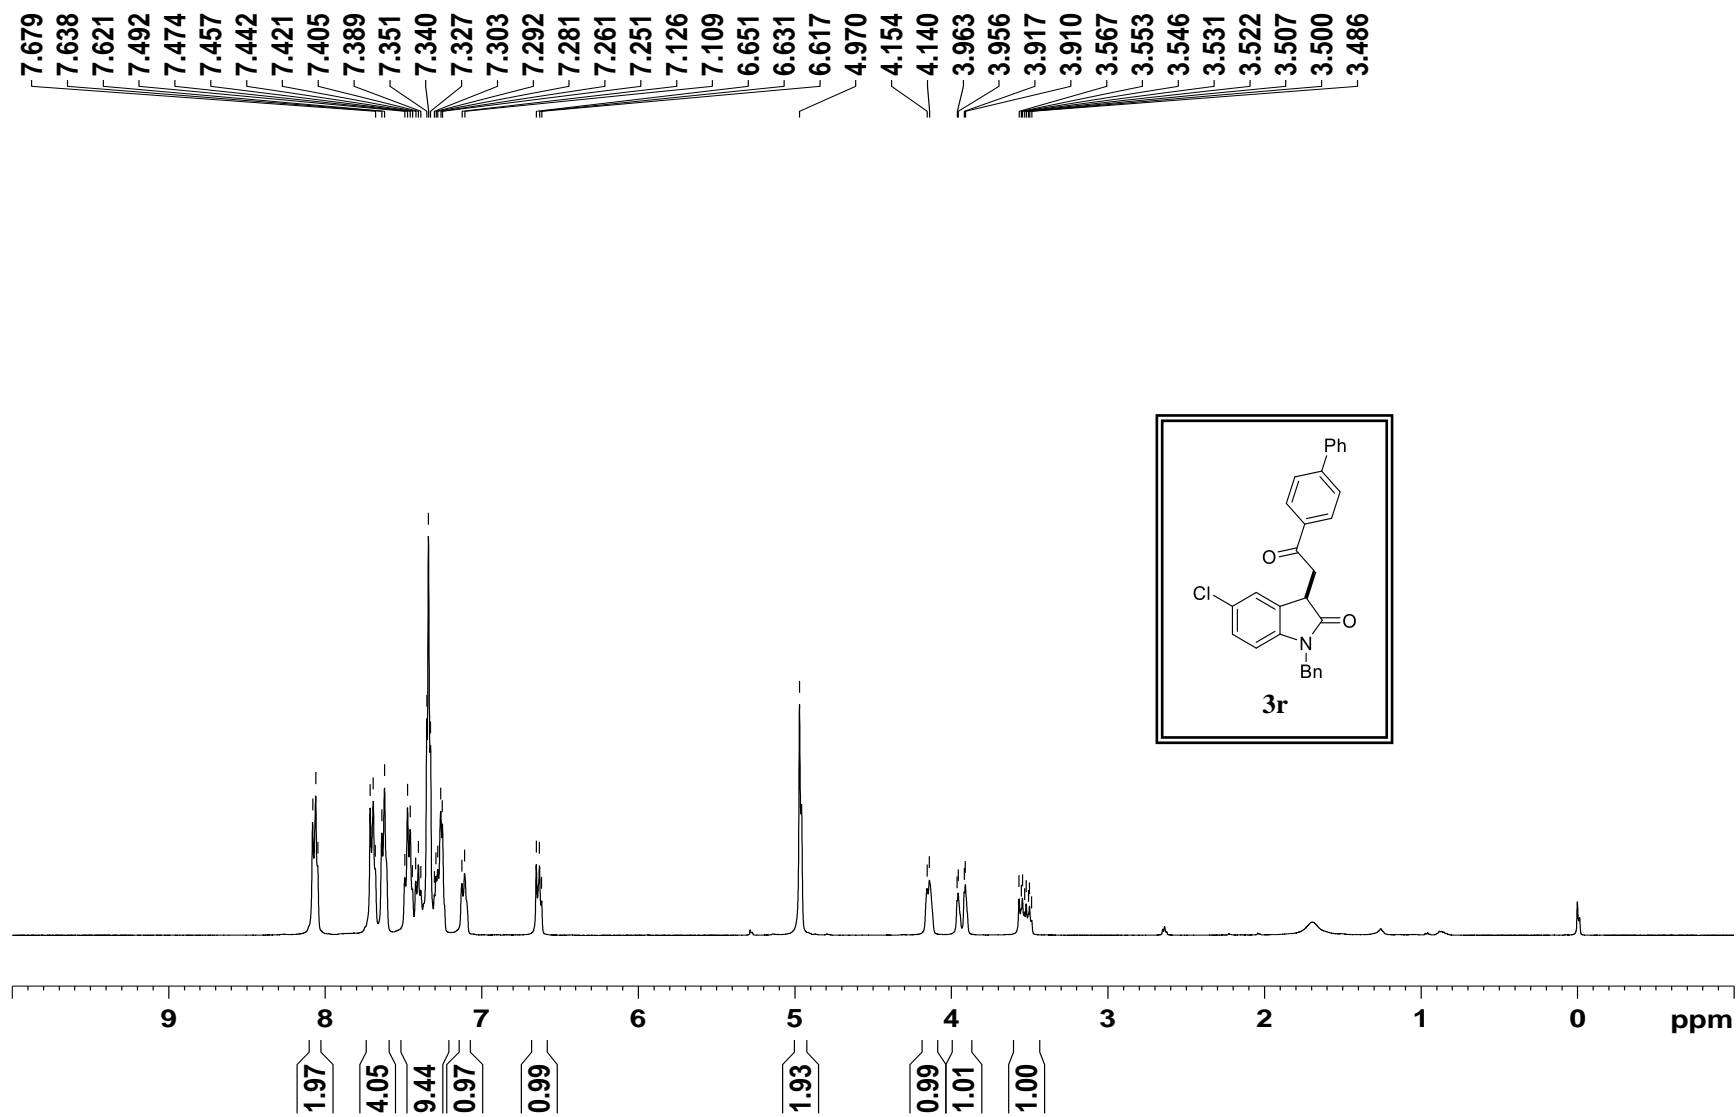

<sup>13</sup>C NMR spectrum of **3r**

apr-403 C13CPD CDC13 9/7/2019

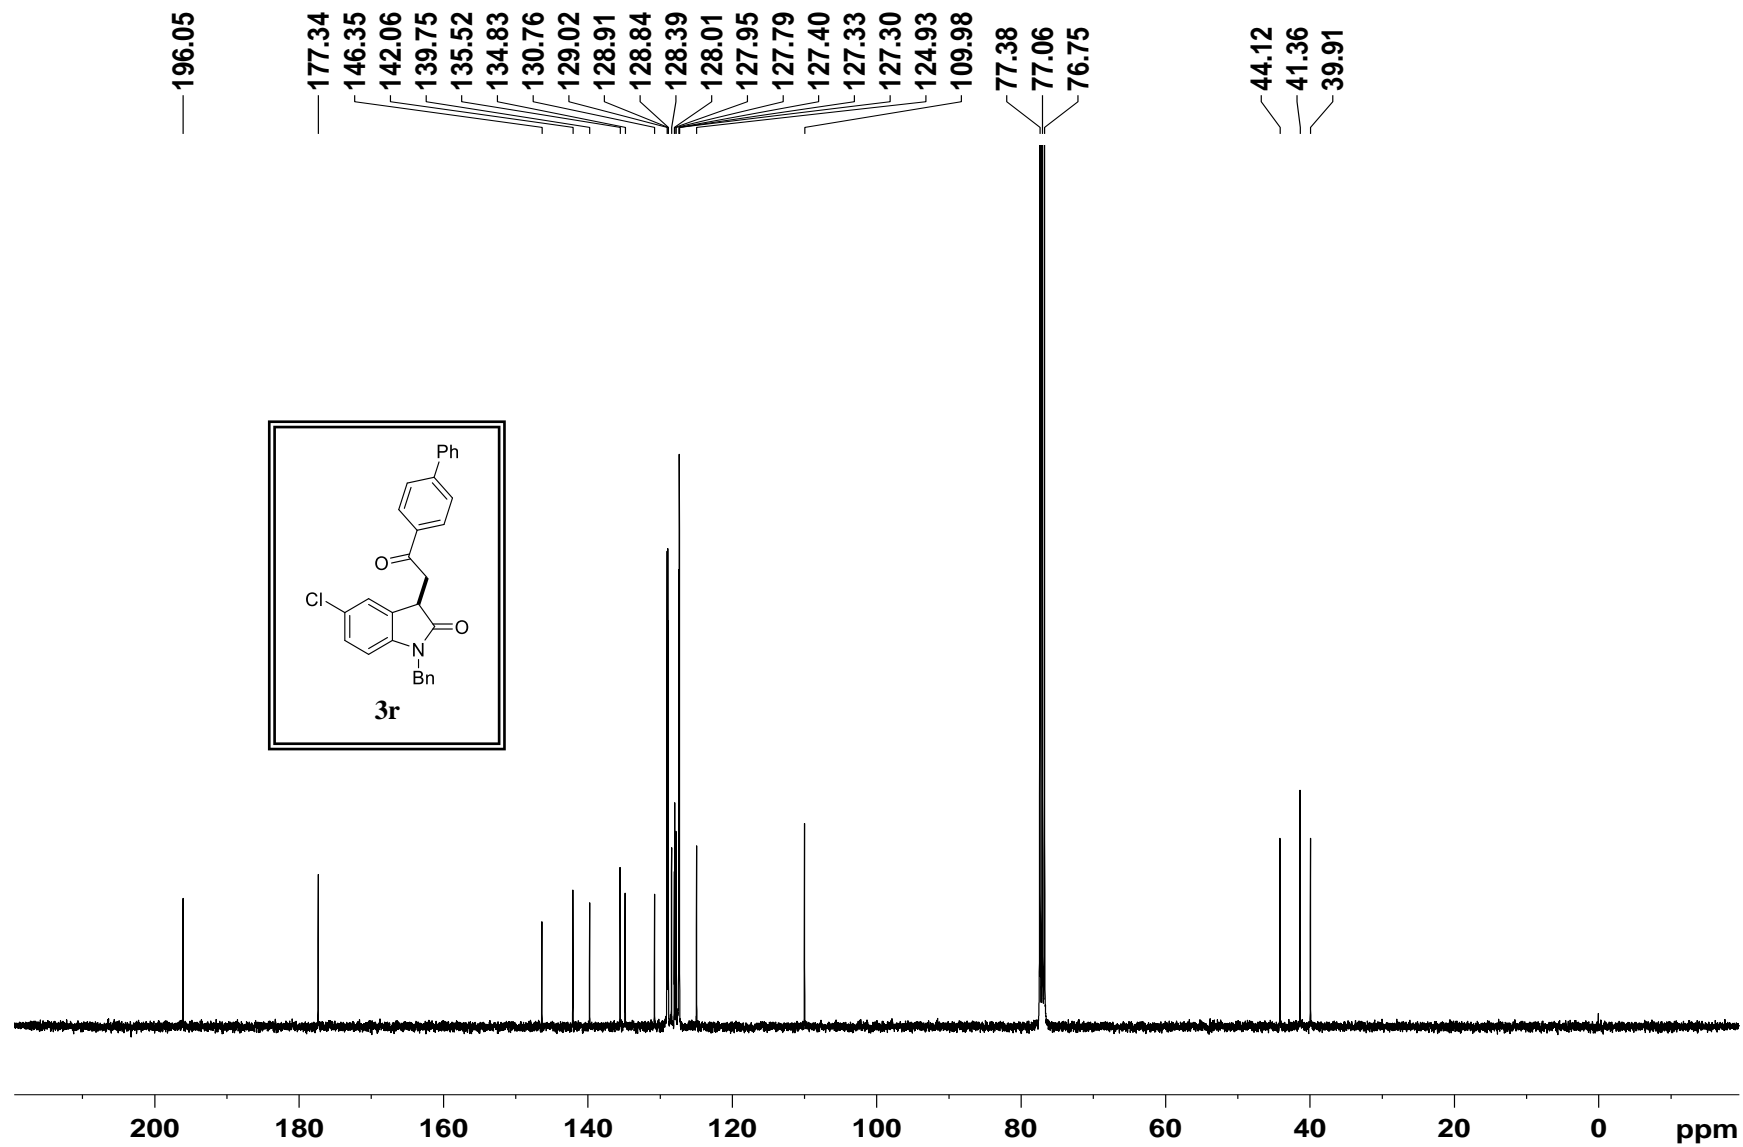

<sup>1</sup>H NMR spectrum of 3s

apr-552 PROTON CDC13 28/11/2019

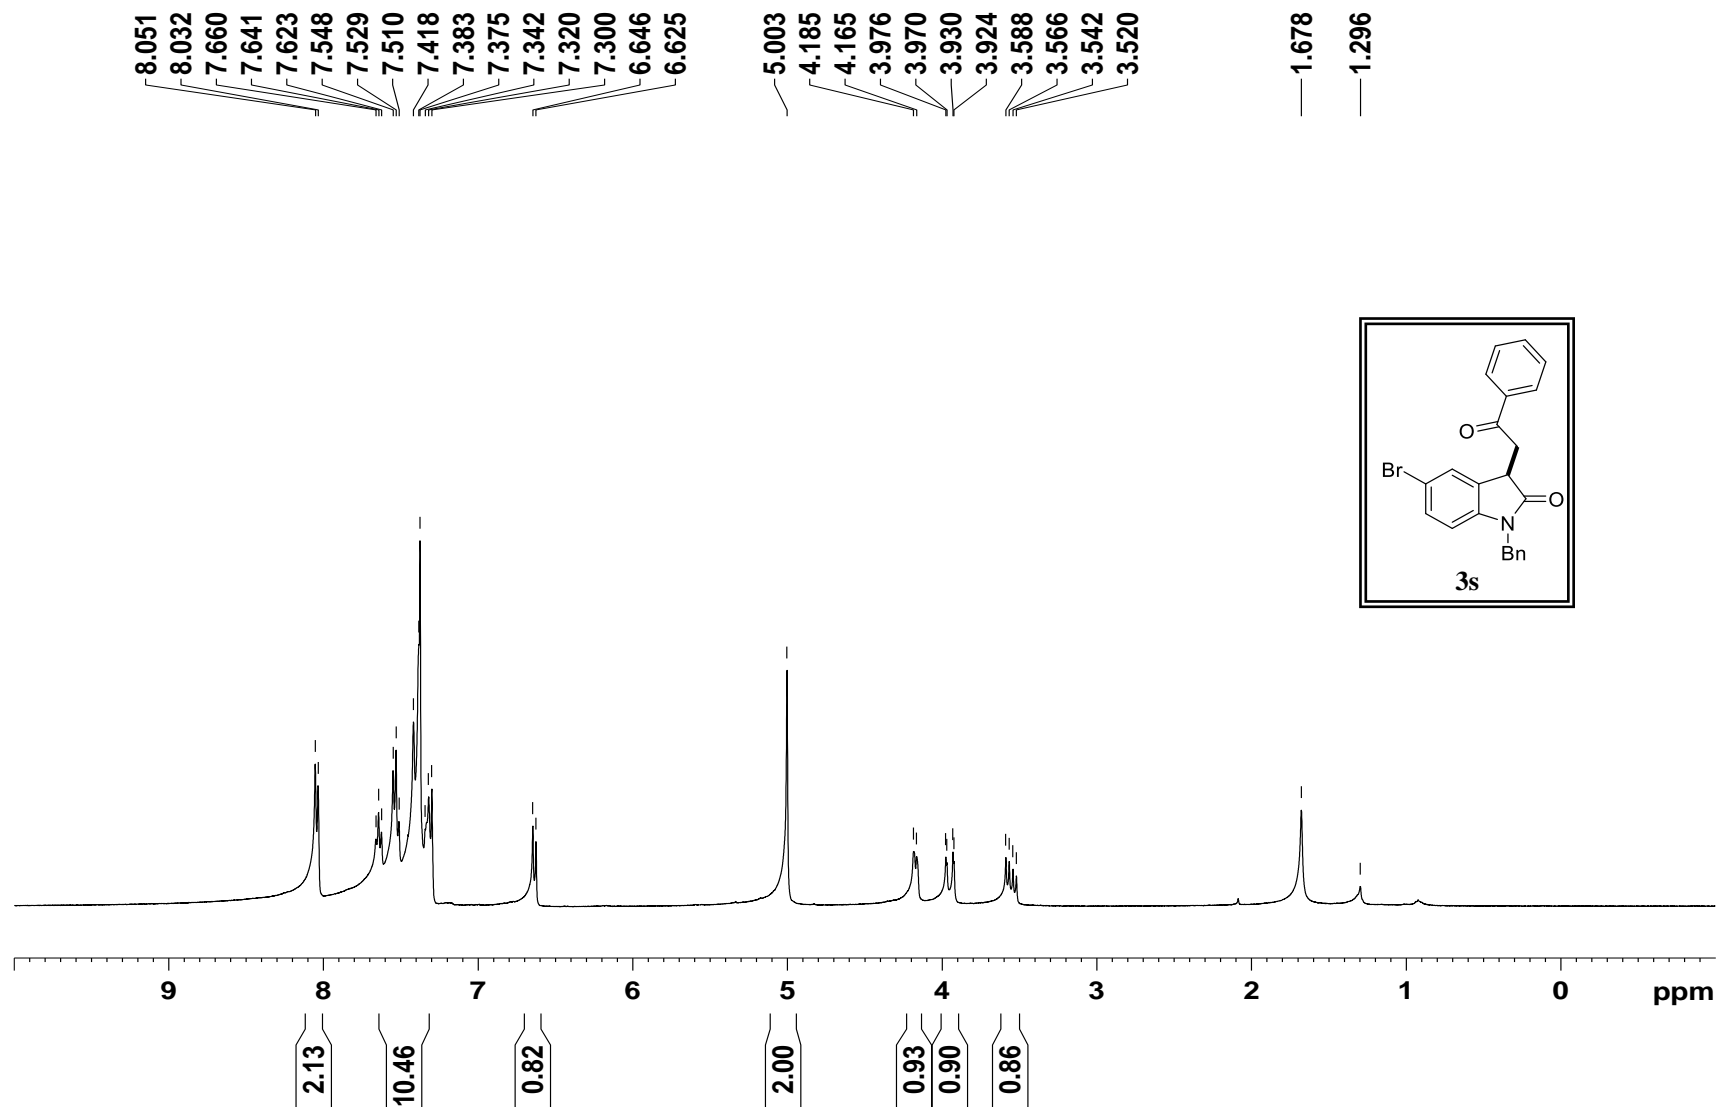

$^{13}\text{C}$  NMR spectrum of 3s

apr-522 C13CPD CDC13 25/11/2021

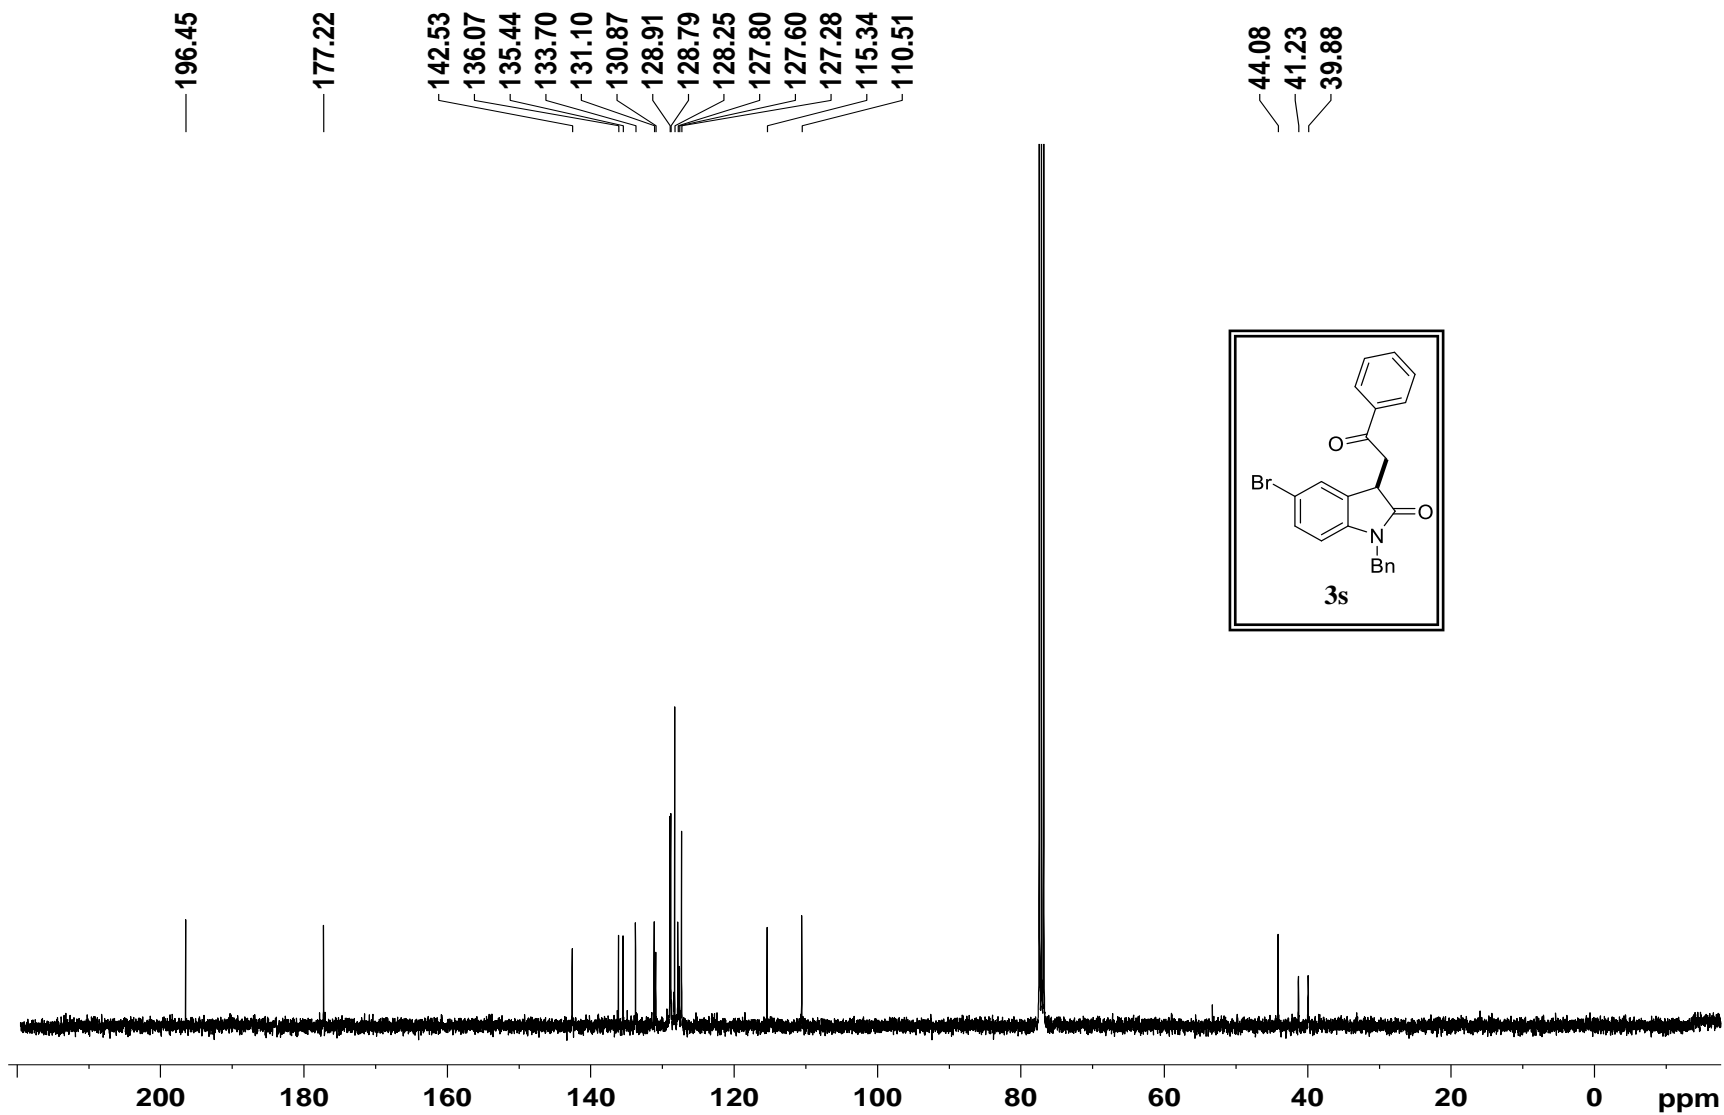



<sup>1</sup>H NMR spectrum of **3t**

apr-240 PROTON CDC13 21/3/2018

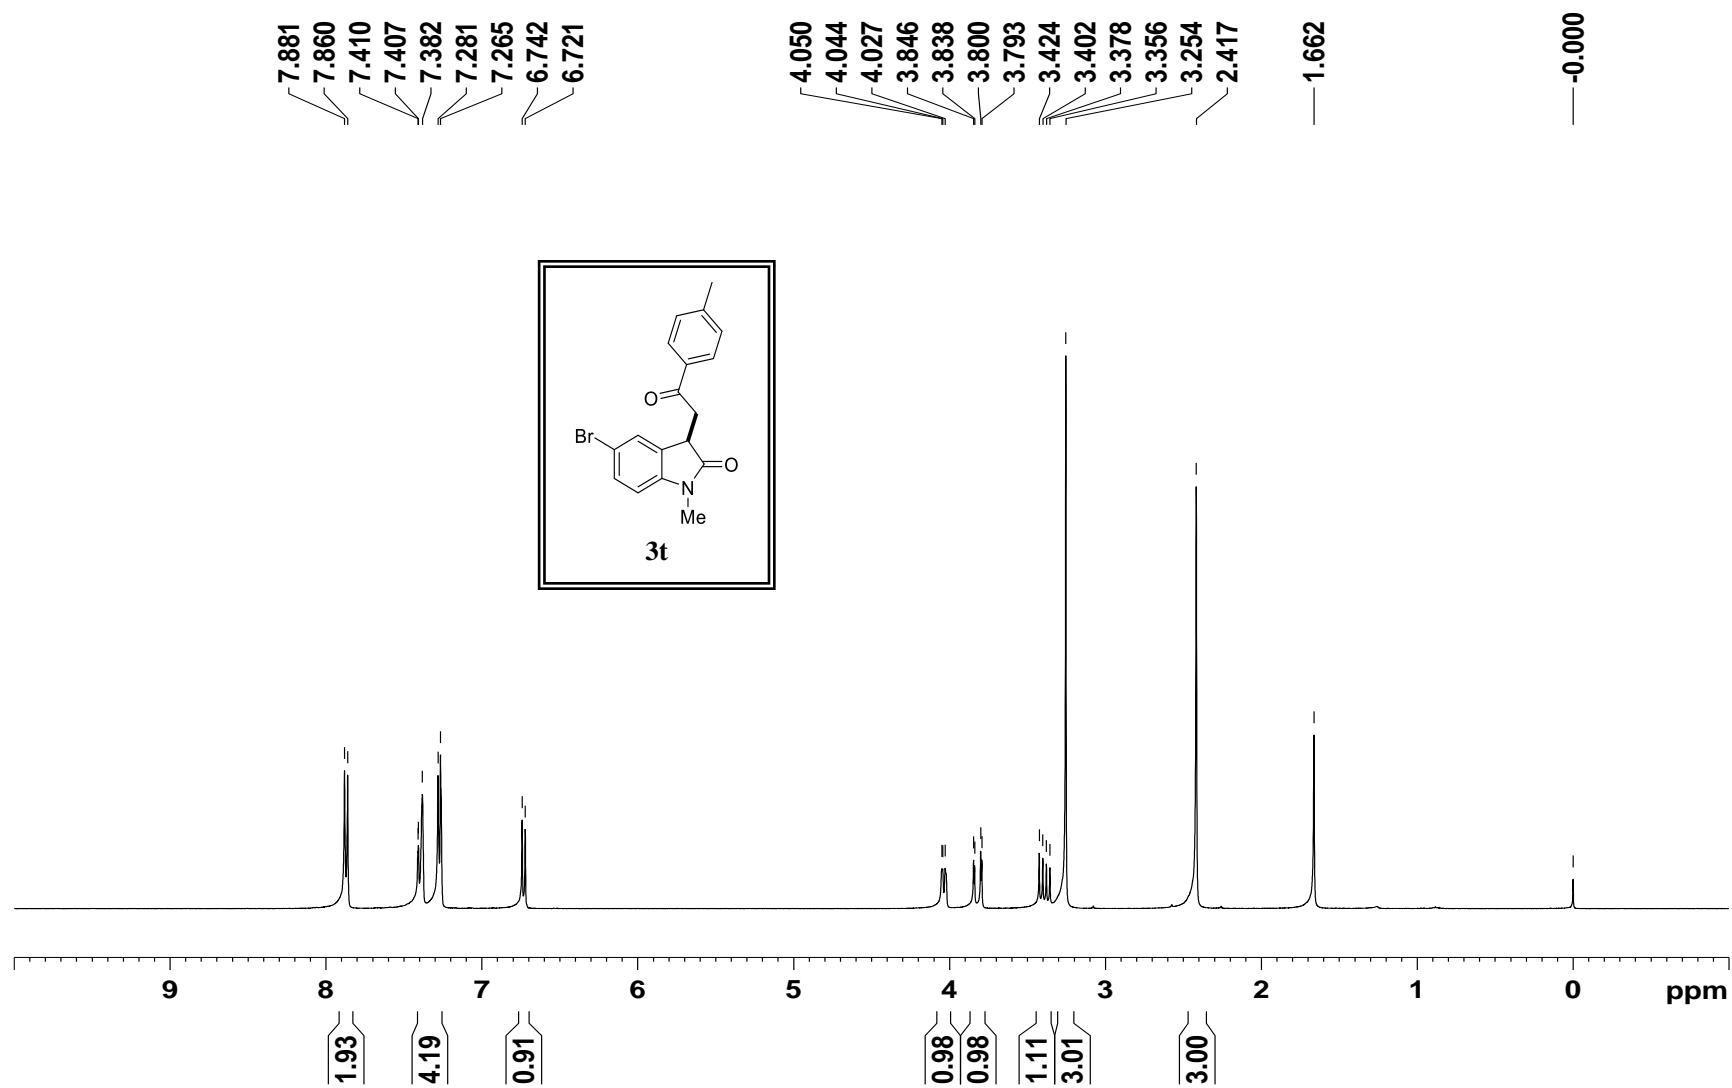

<sup>13</sup>C NMR spectrum of **3t**

apr-240 C13CPD CDC13 21/3/2018

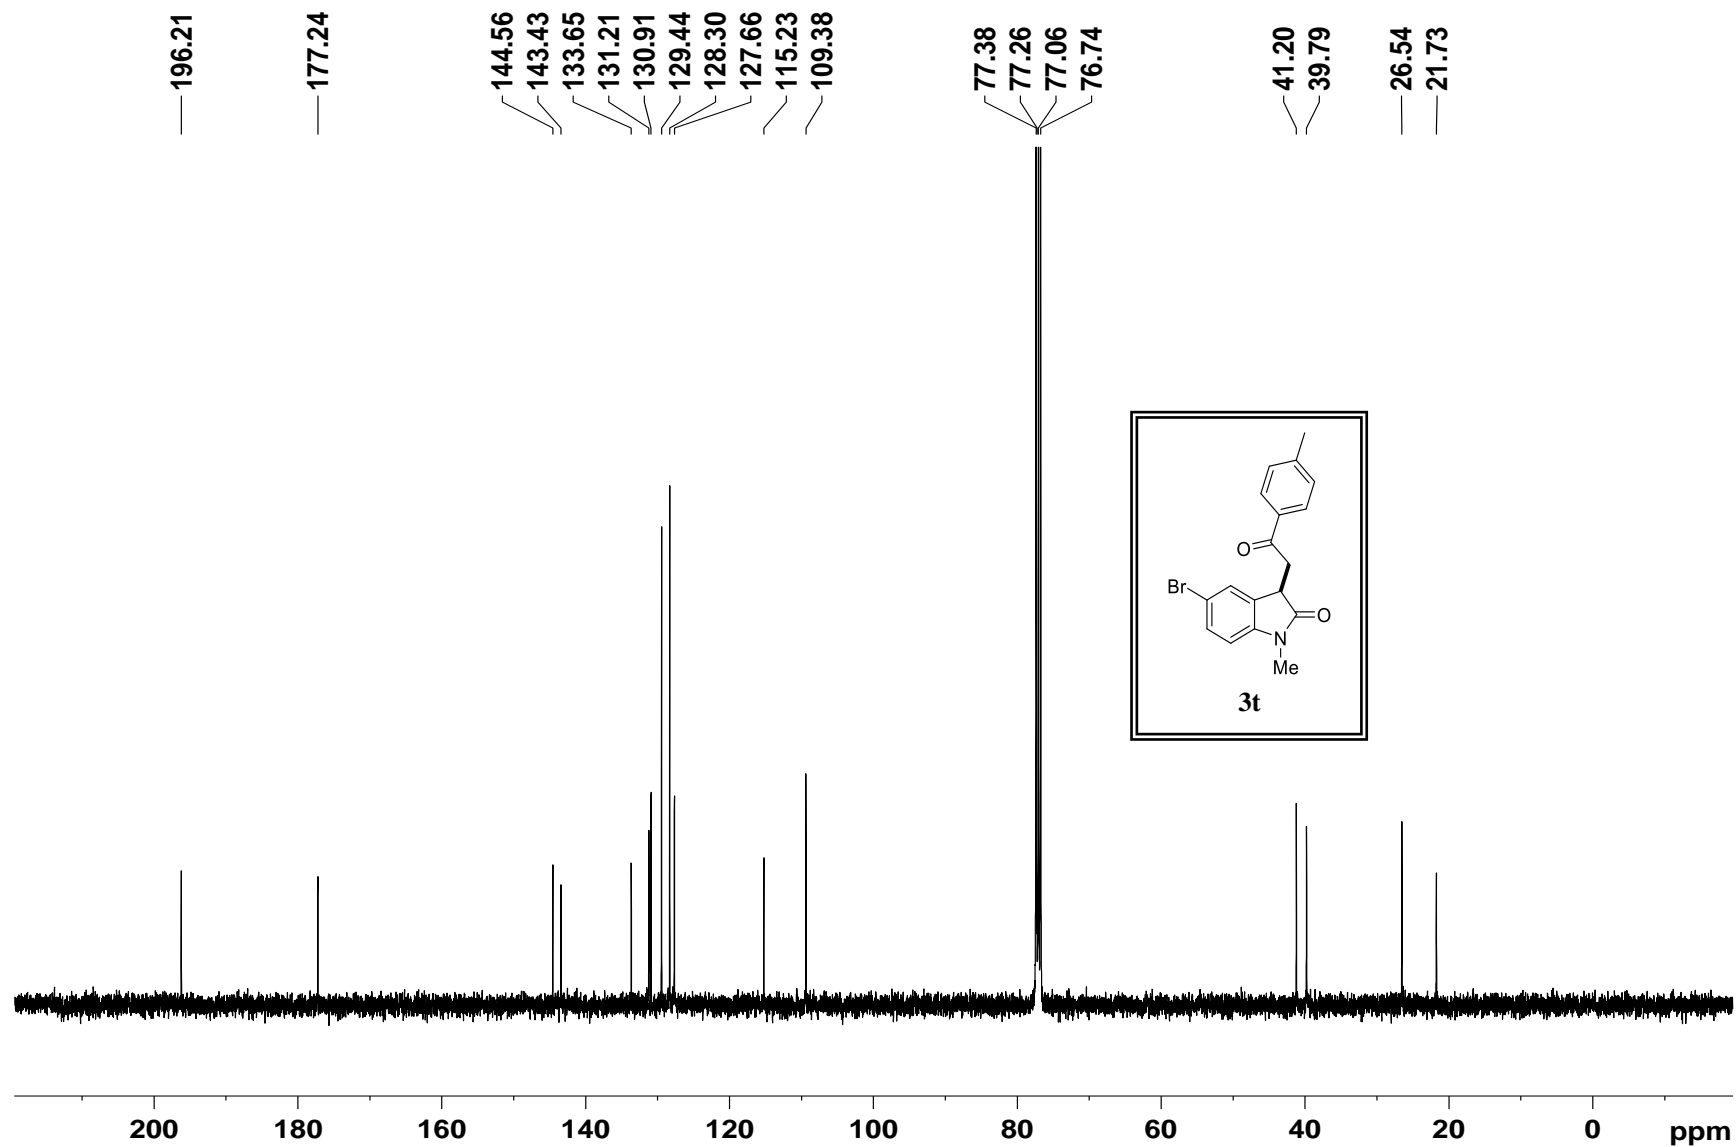

<sup>1</sup>H NMR spectrum of **3u**

apr-553 PROTON CDC13 25/11/2019

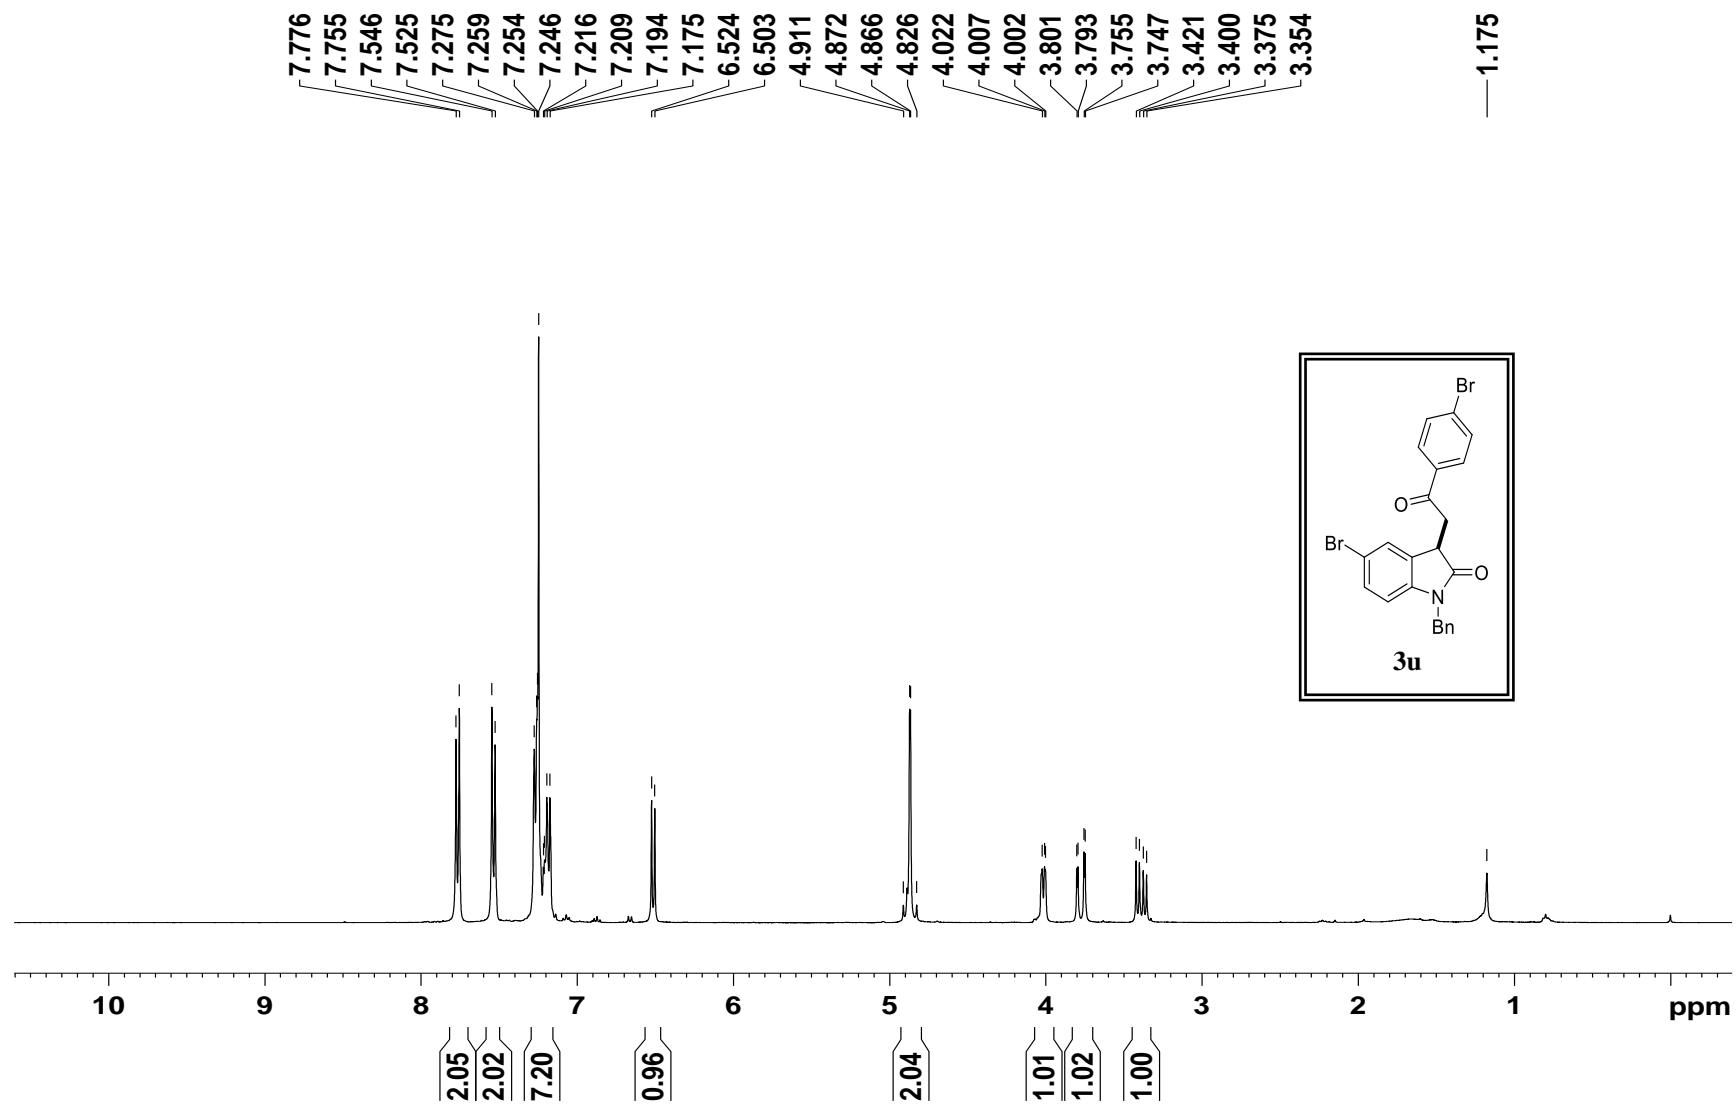

$^{13}\text{C}$  NMR spectrum of **3u**

apr-523 C13CPD CDC13 25/11/2019

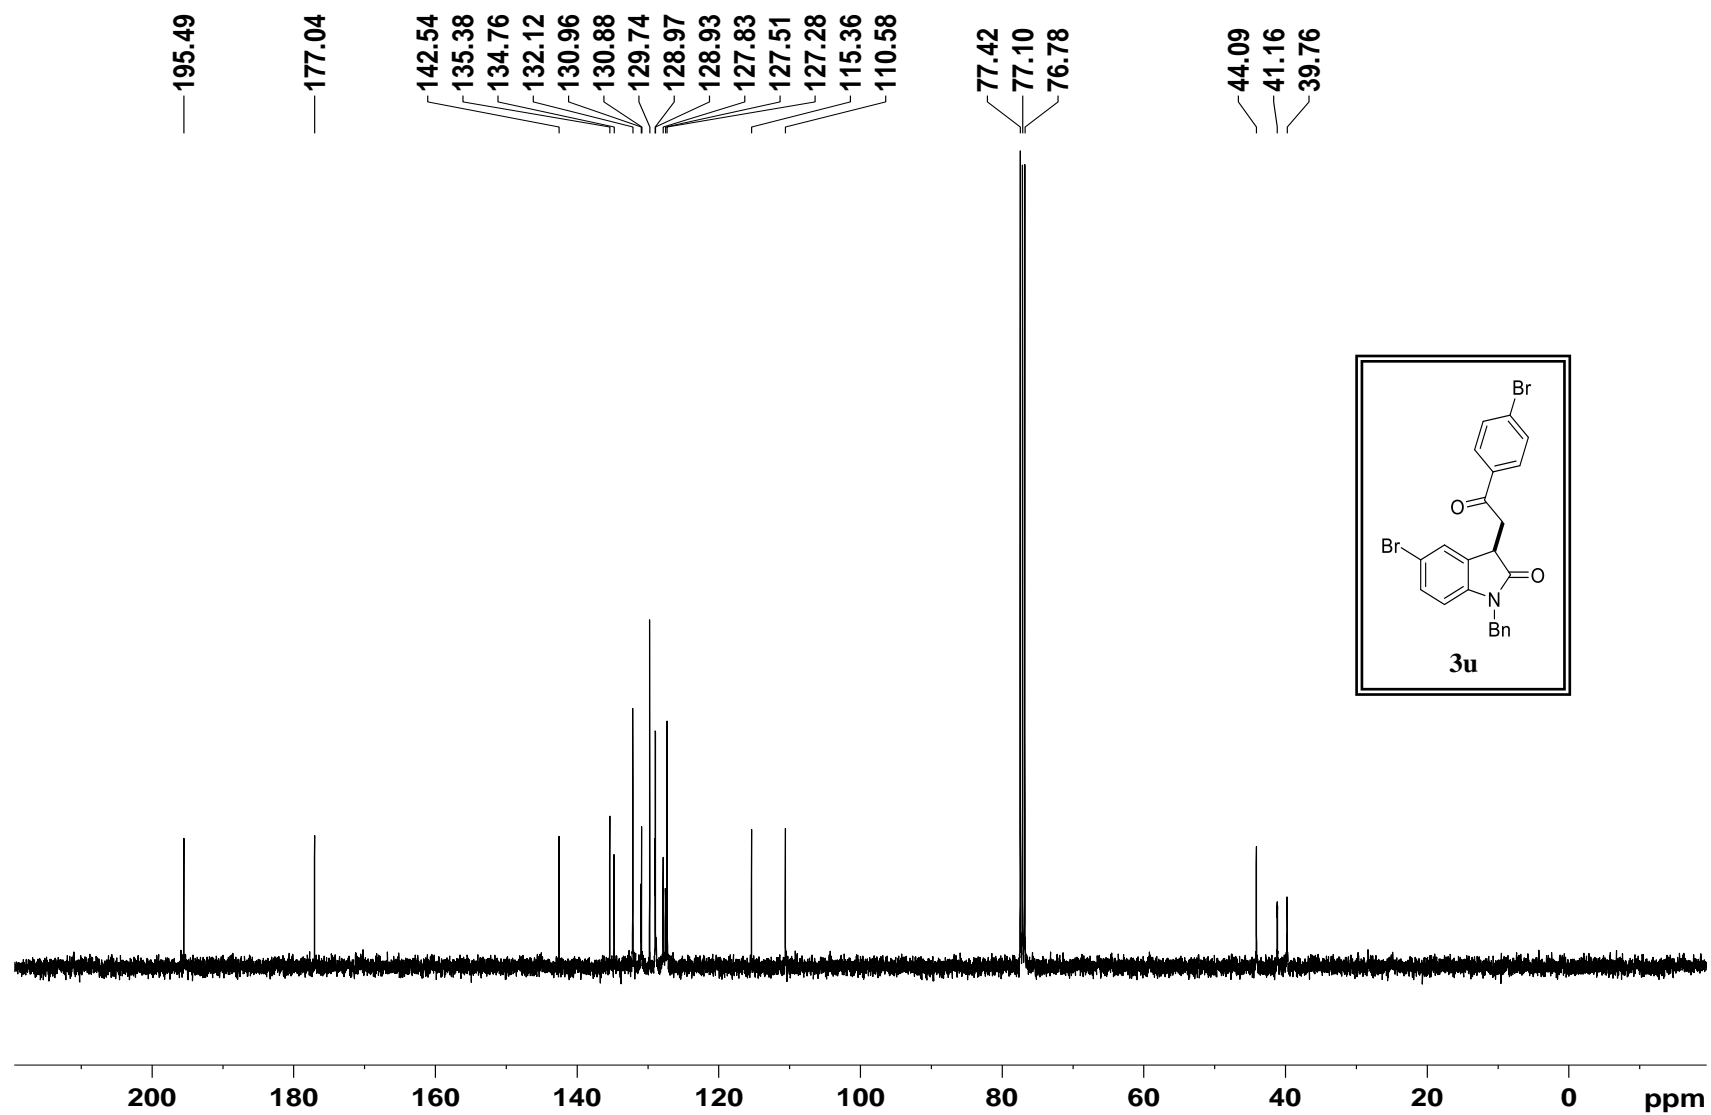

<sup>1</sup>H NMR spectrum of **3v**

apr-559 PROTON CDC13 3/12/2019

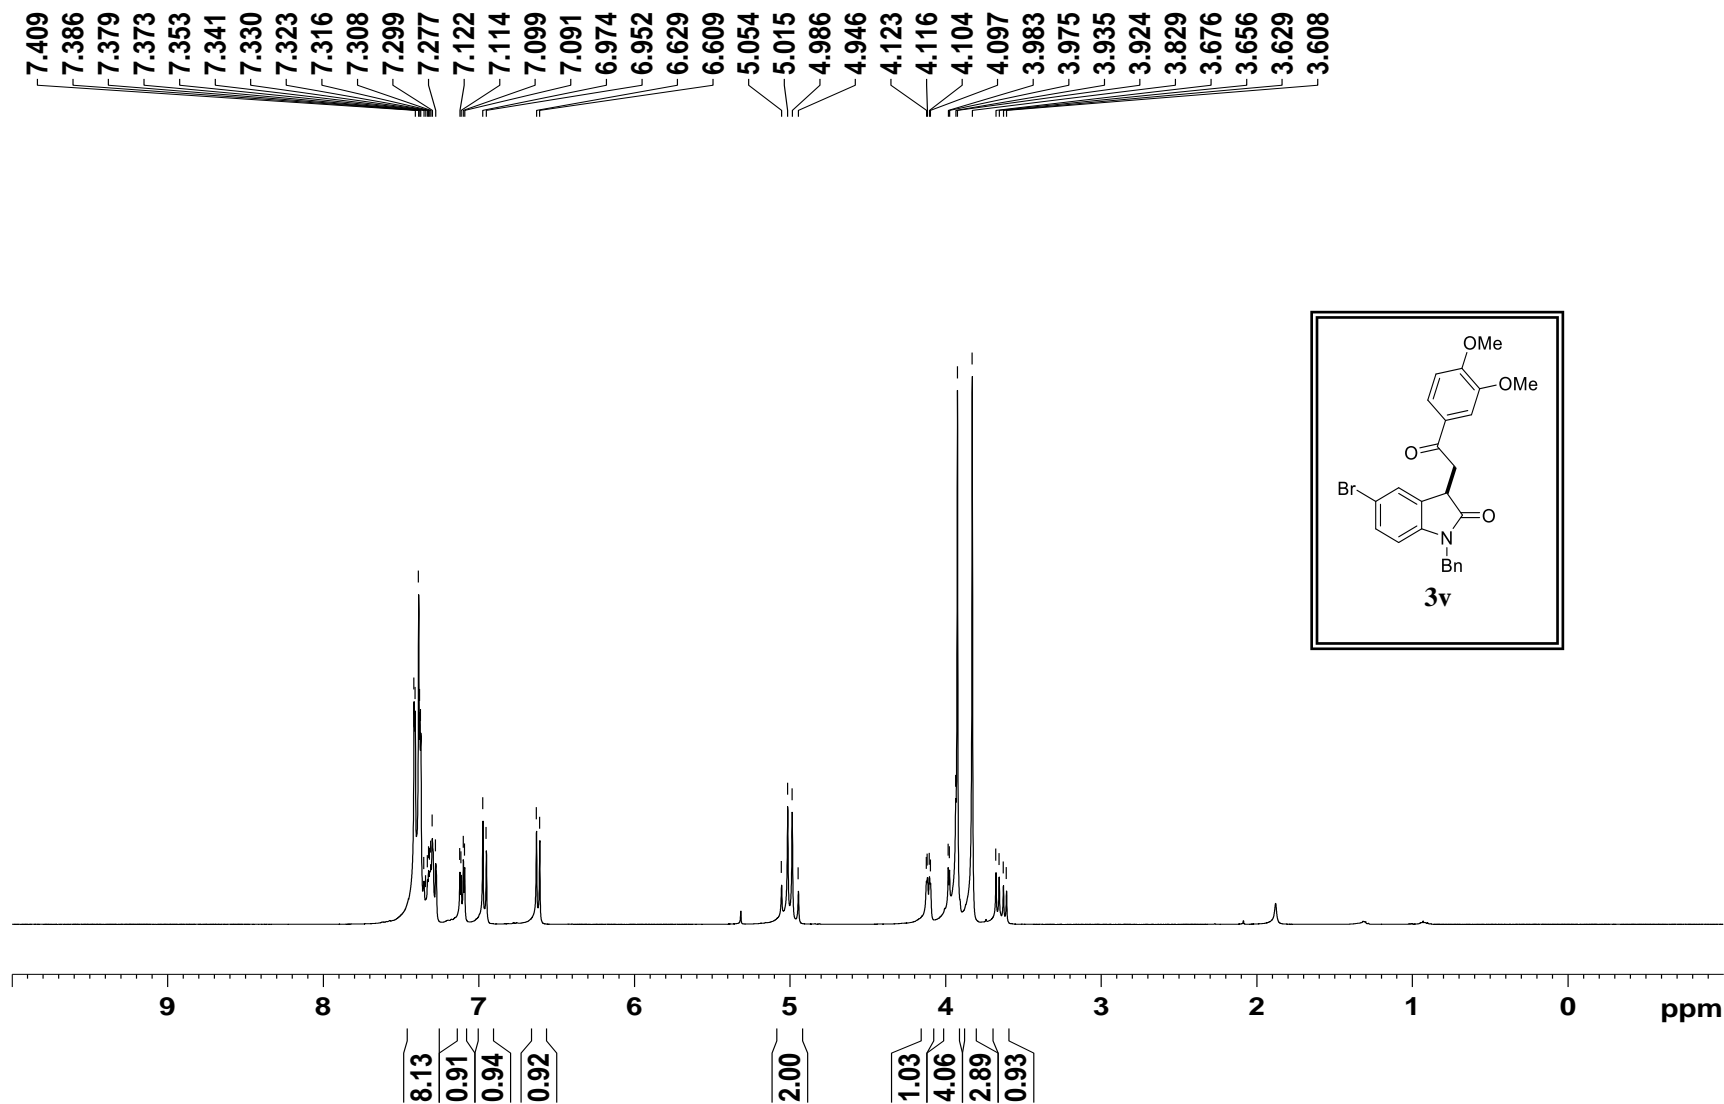

$^{13}\text{C}$  NMR spectrum of **3v**

apr-559 C13CPD CDC13 3/12/2019

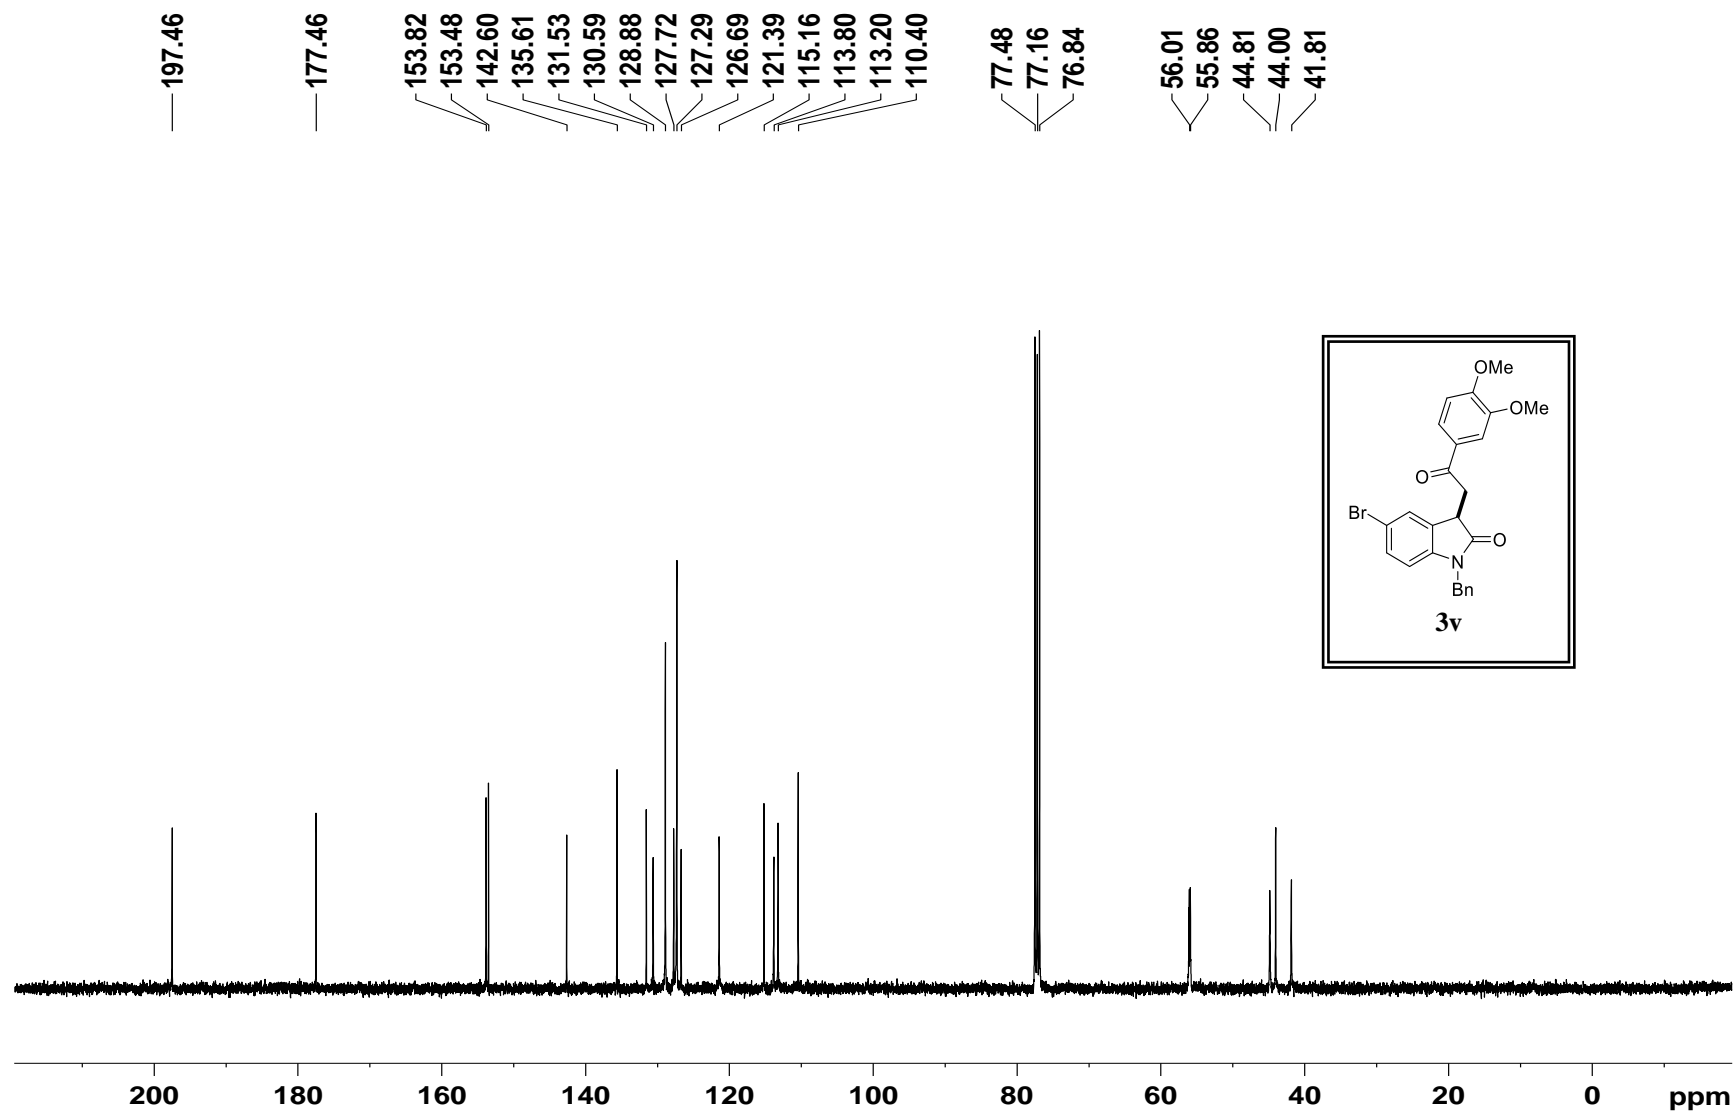

<sup>1</sup>H NMR spectrum of **3w**

trial-2 apr-368 PROTON CDCl3 22/12/2018

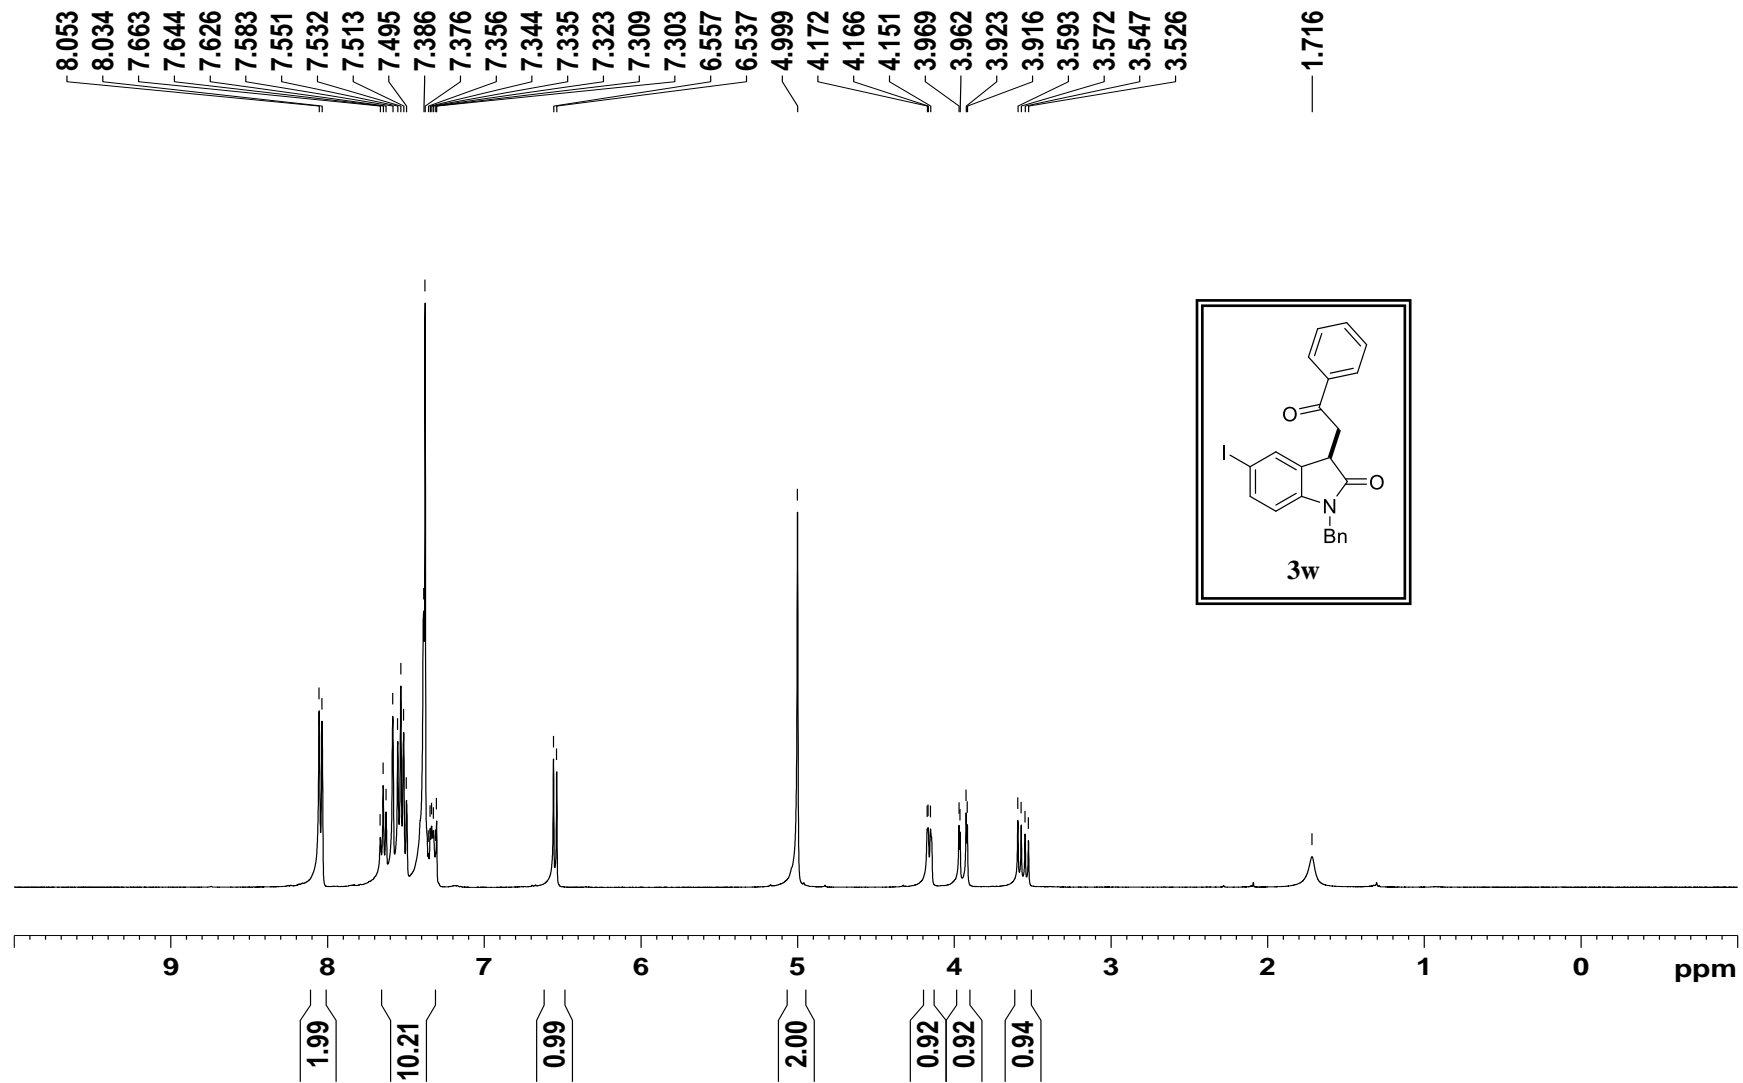

$^{13}\text{C}$  NMR spectrum of **3w**

trial-2 apr-368 C13CPD CDC13 22/12/2018

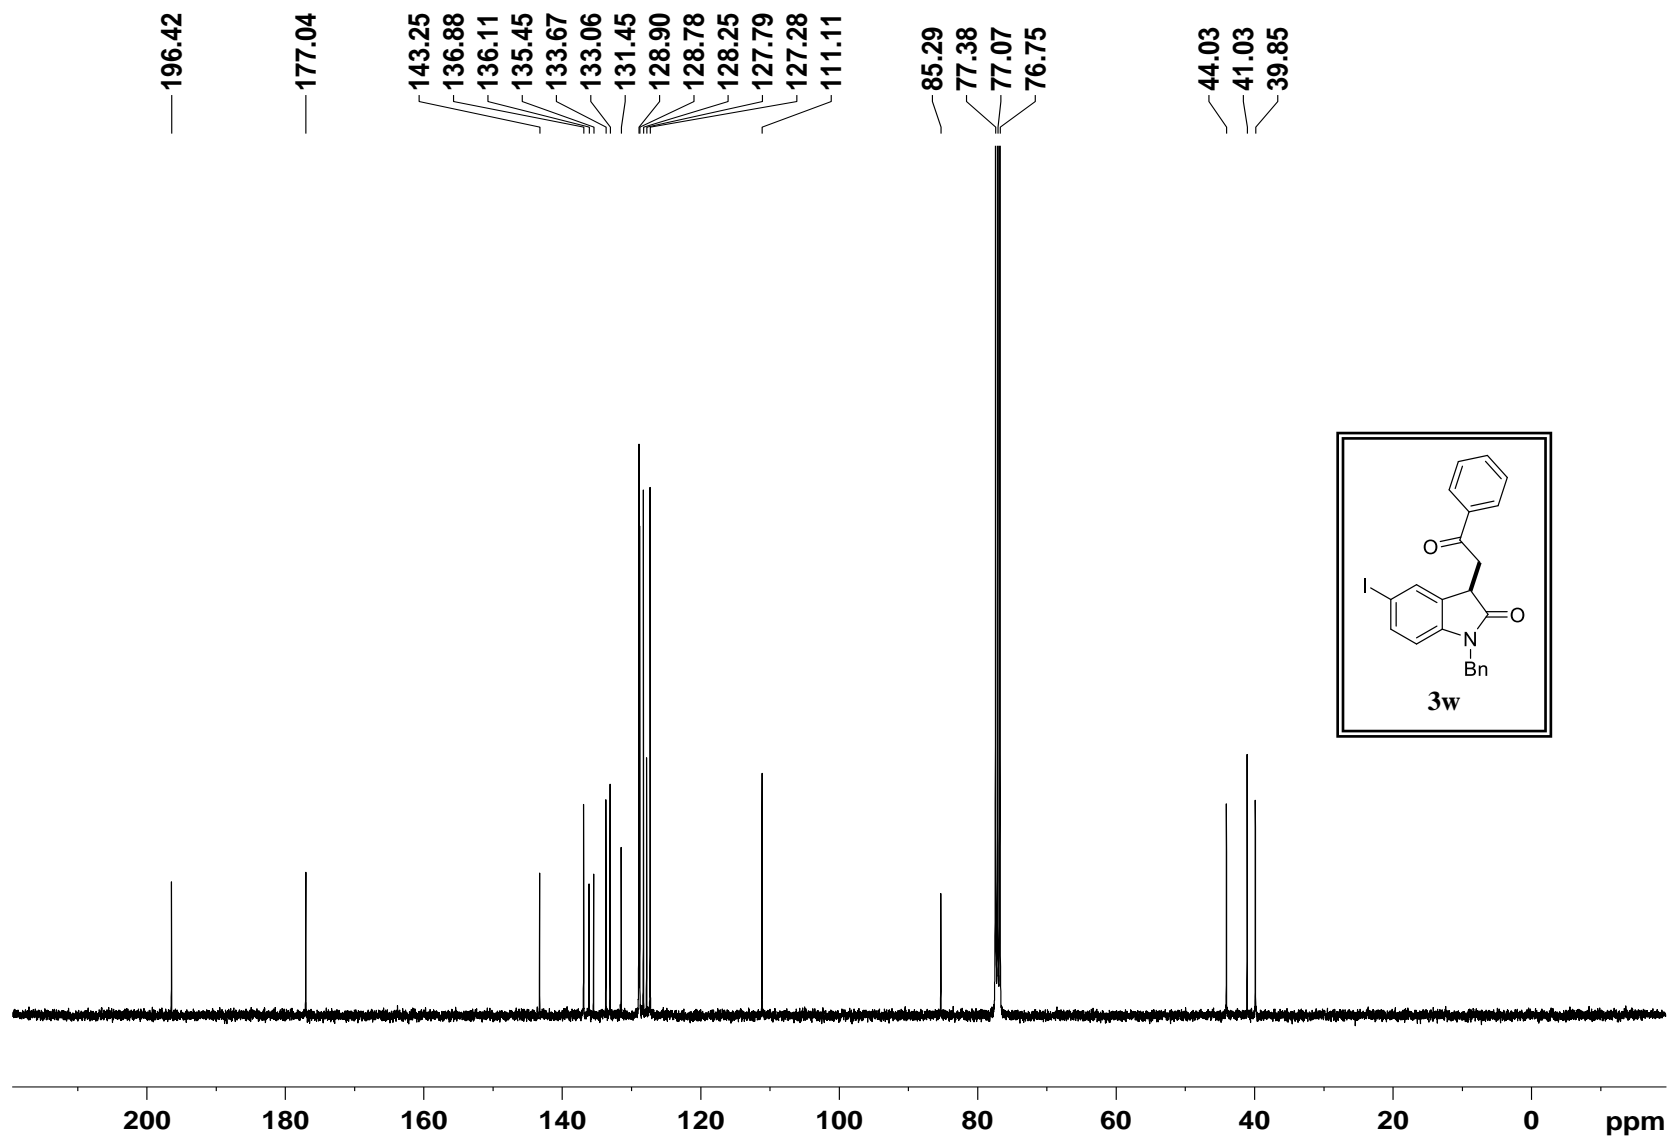



<sup>1</sup>H NMR spectrum of 3x

apr-564 PROTON CDC13 4/12/2019

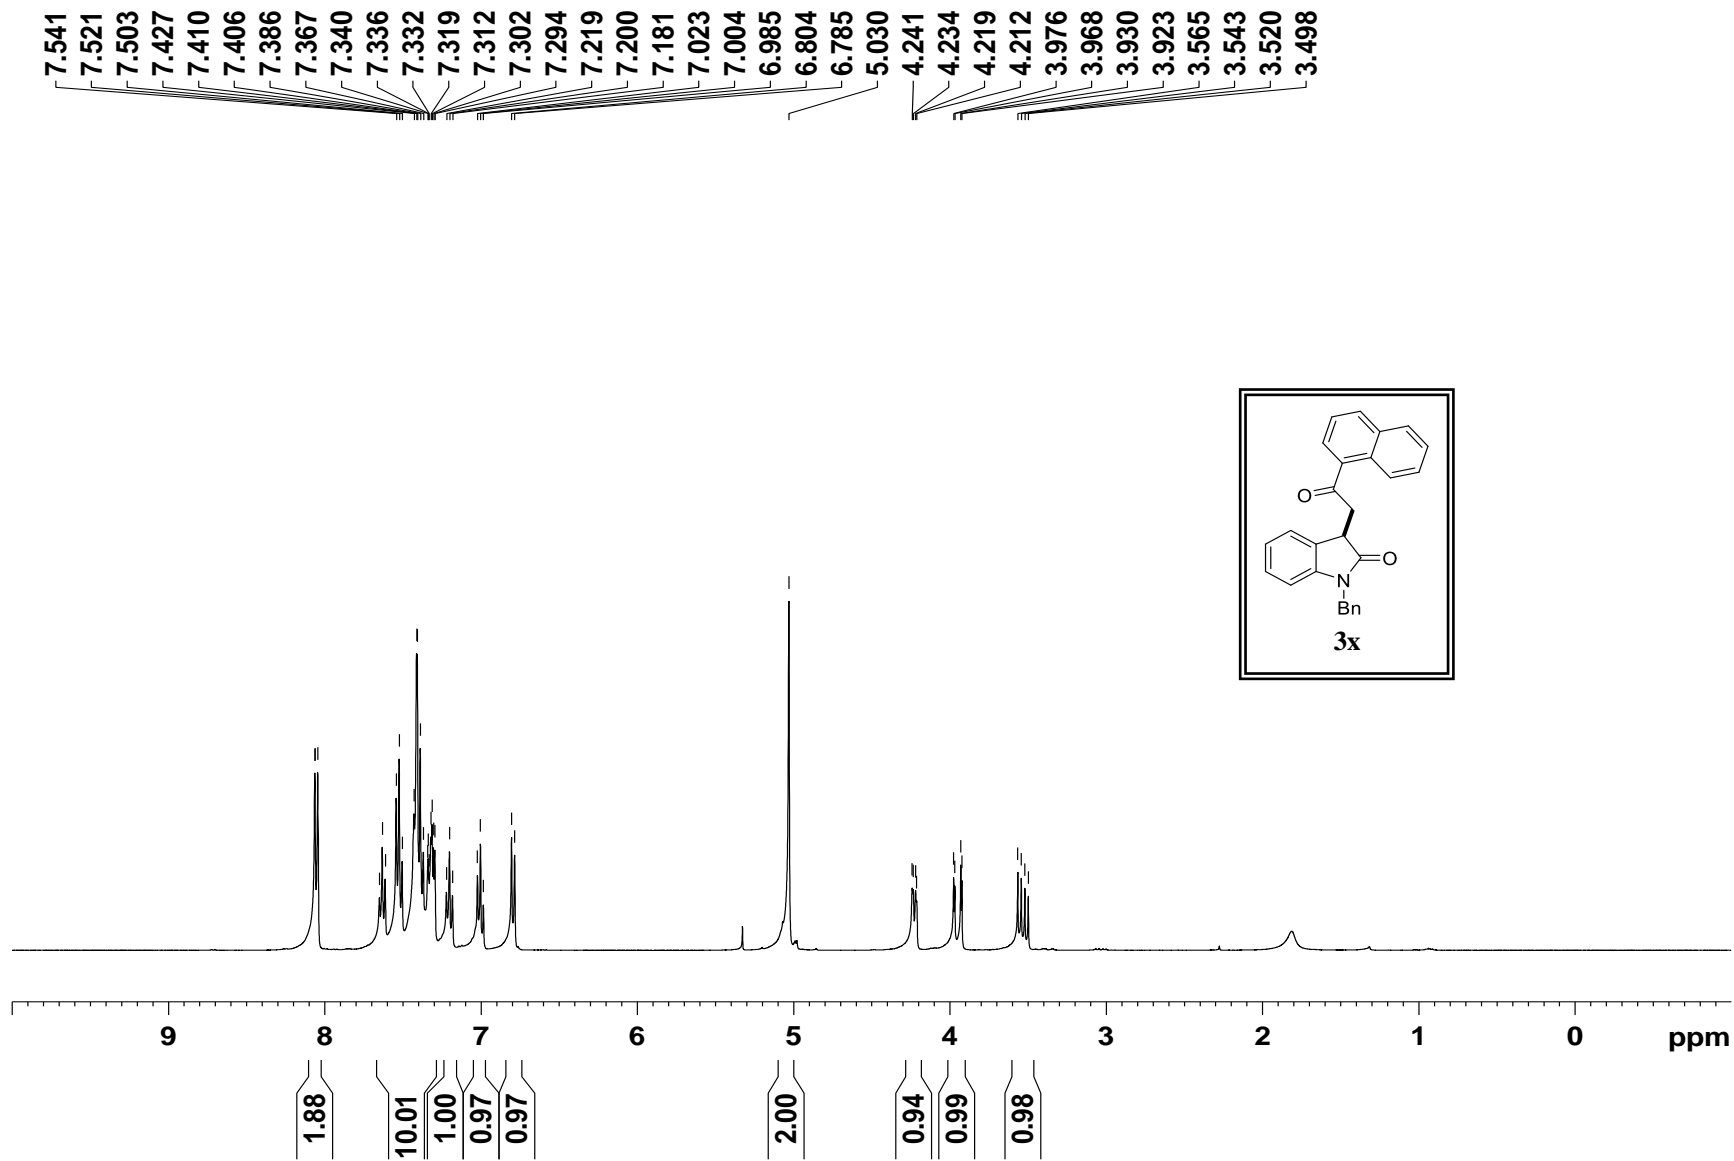

$^{13}\text{C}$  NMR spectrum of **3x**

apr-564 C13CPD CDC13 4/12/2019

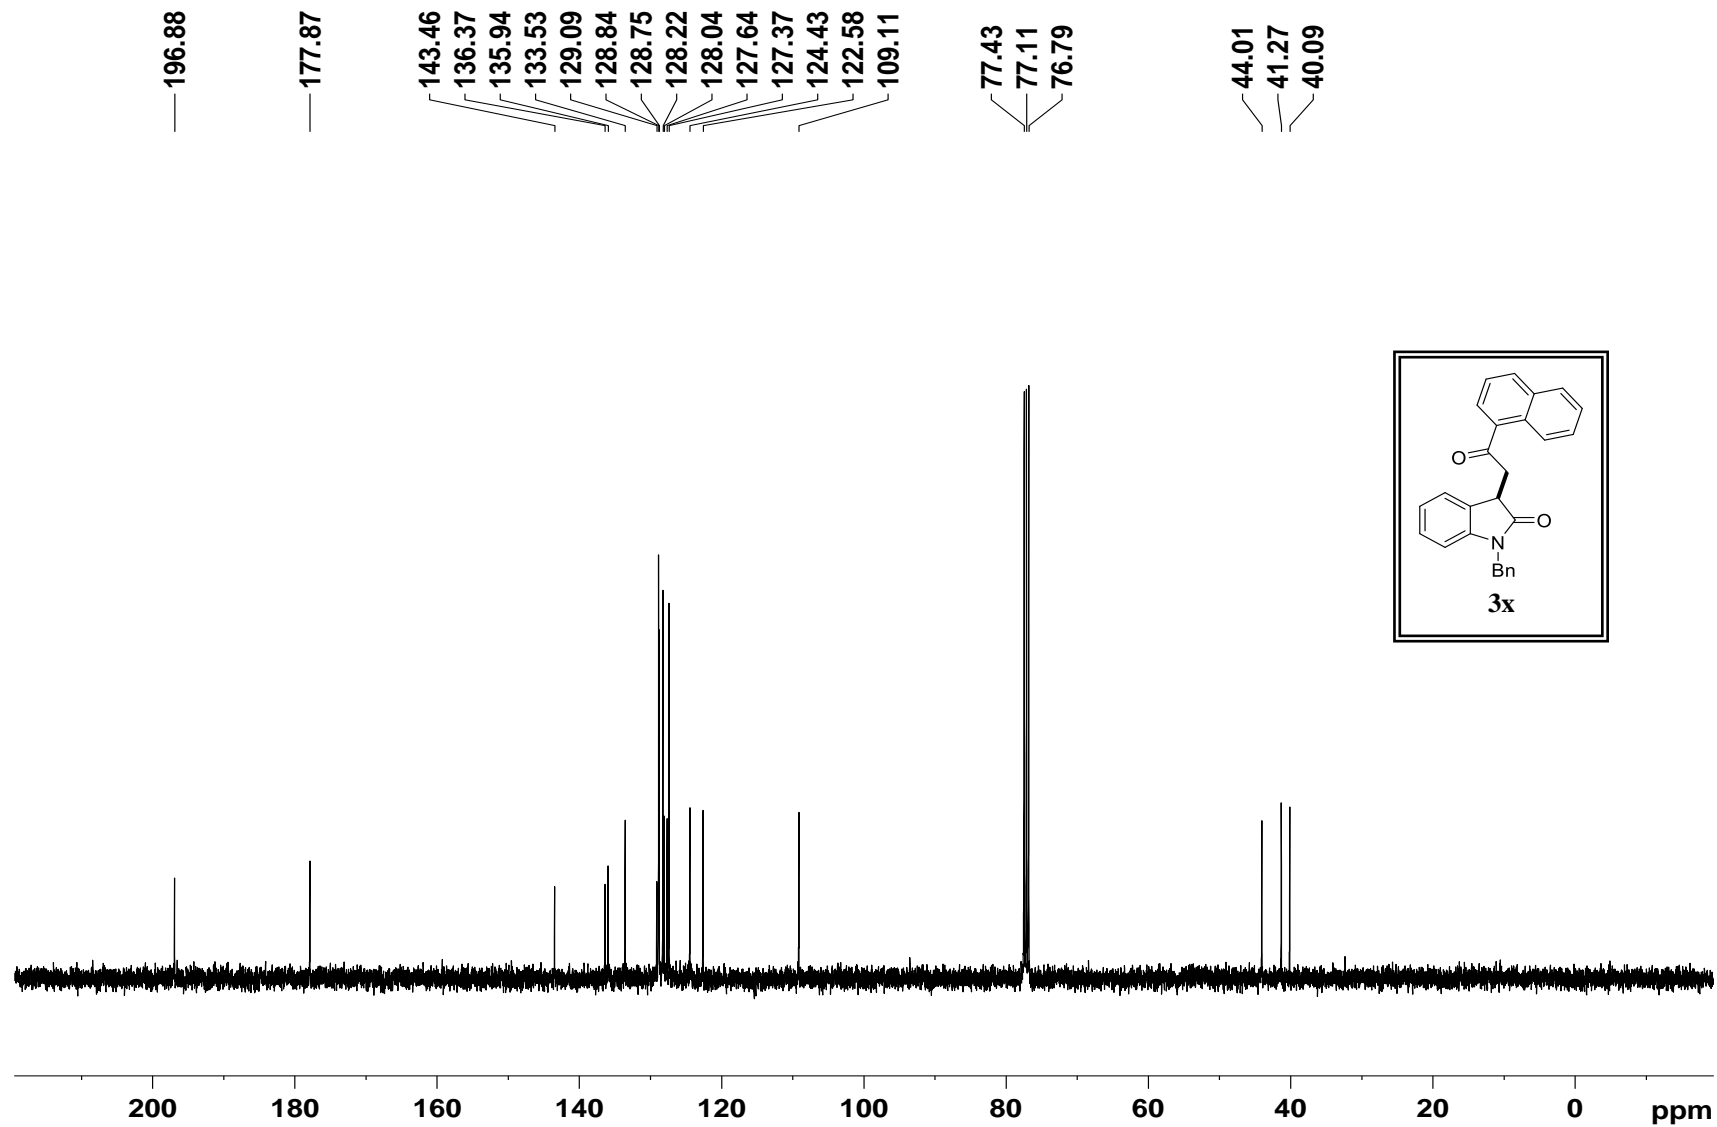

<sup>1</sup>H NMR spectrum of 3y

apr-337 PROTON CDCl3 22/9/2018

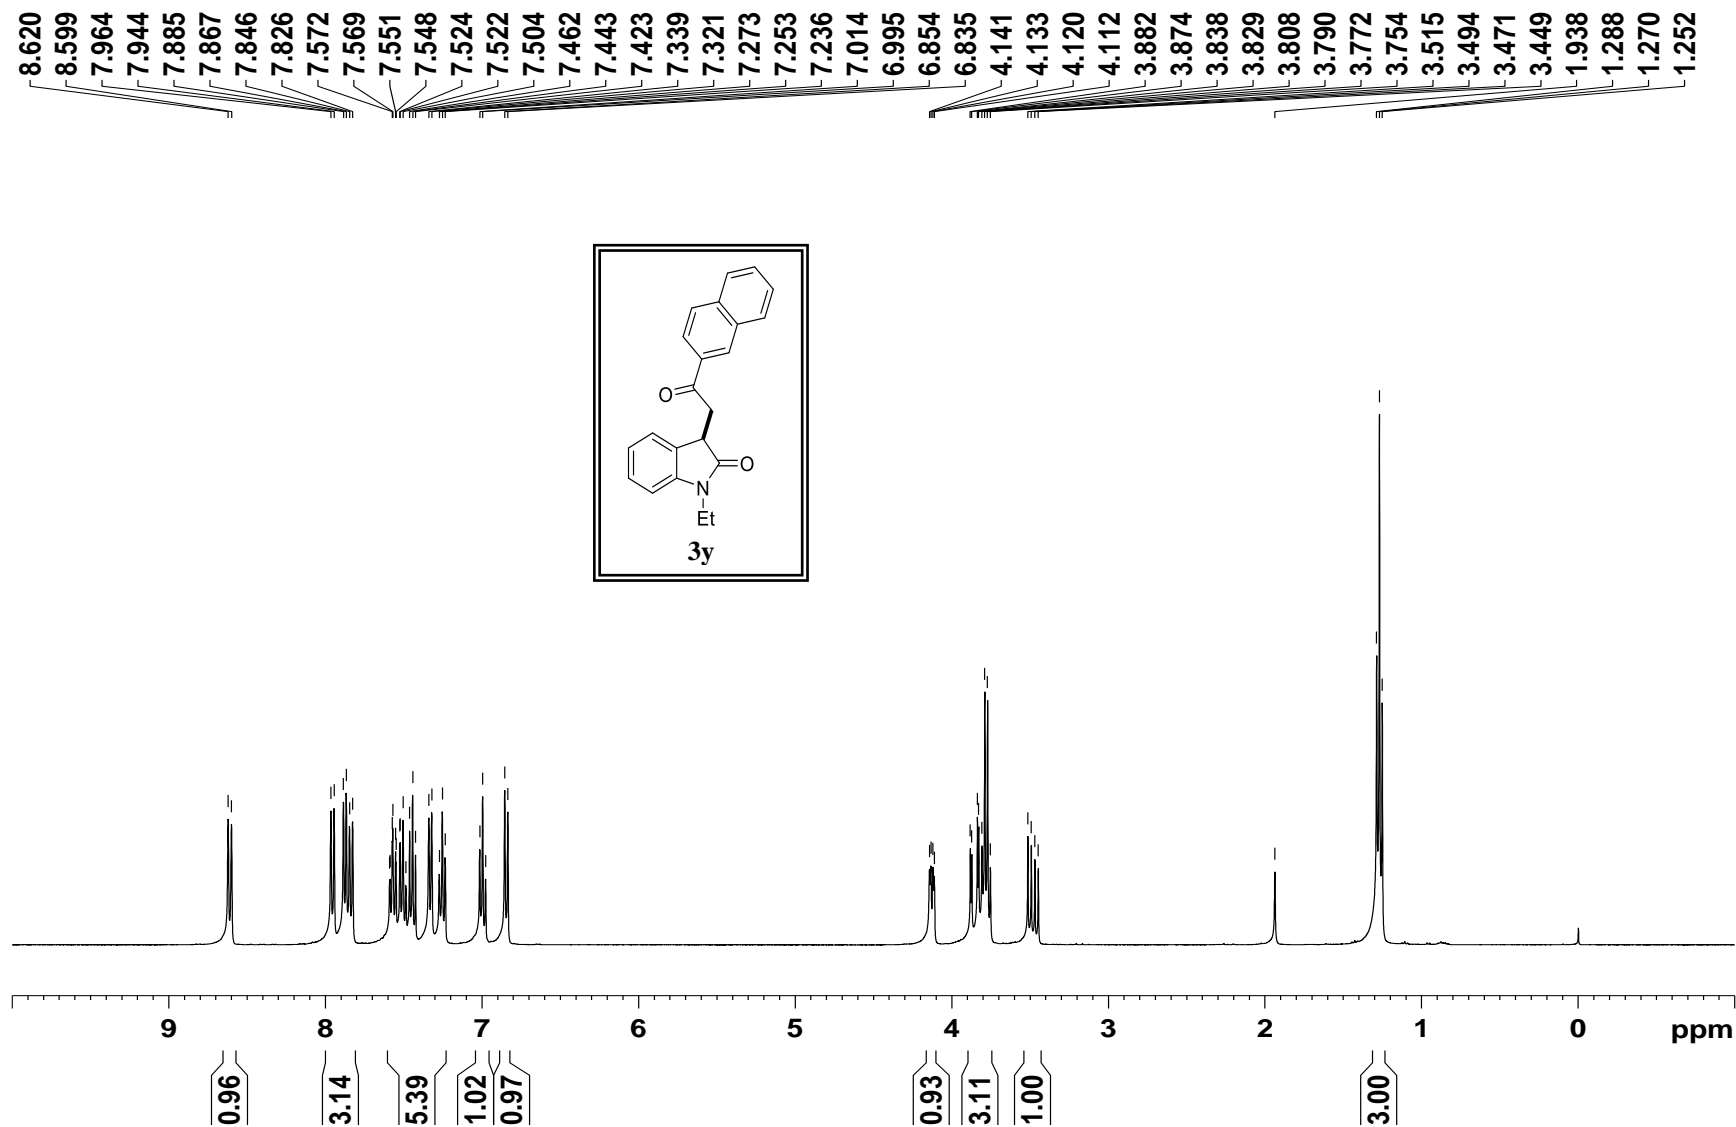

<sup>13</sup>C NMR spectrum of **3y**

apr-337 C13CPD CDC13 22/9/2018

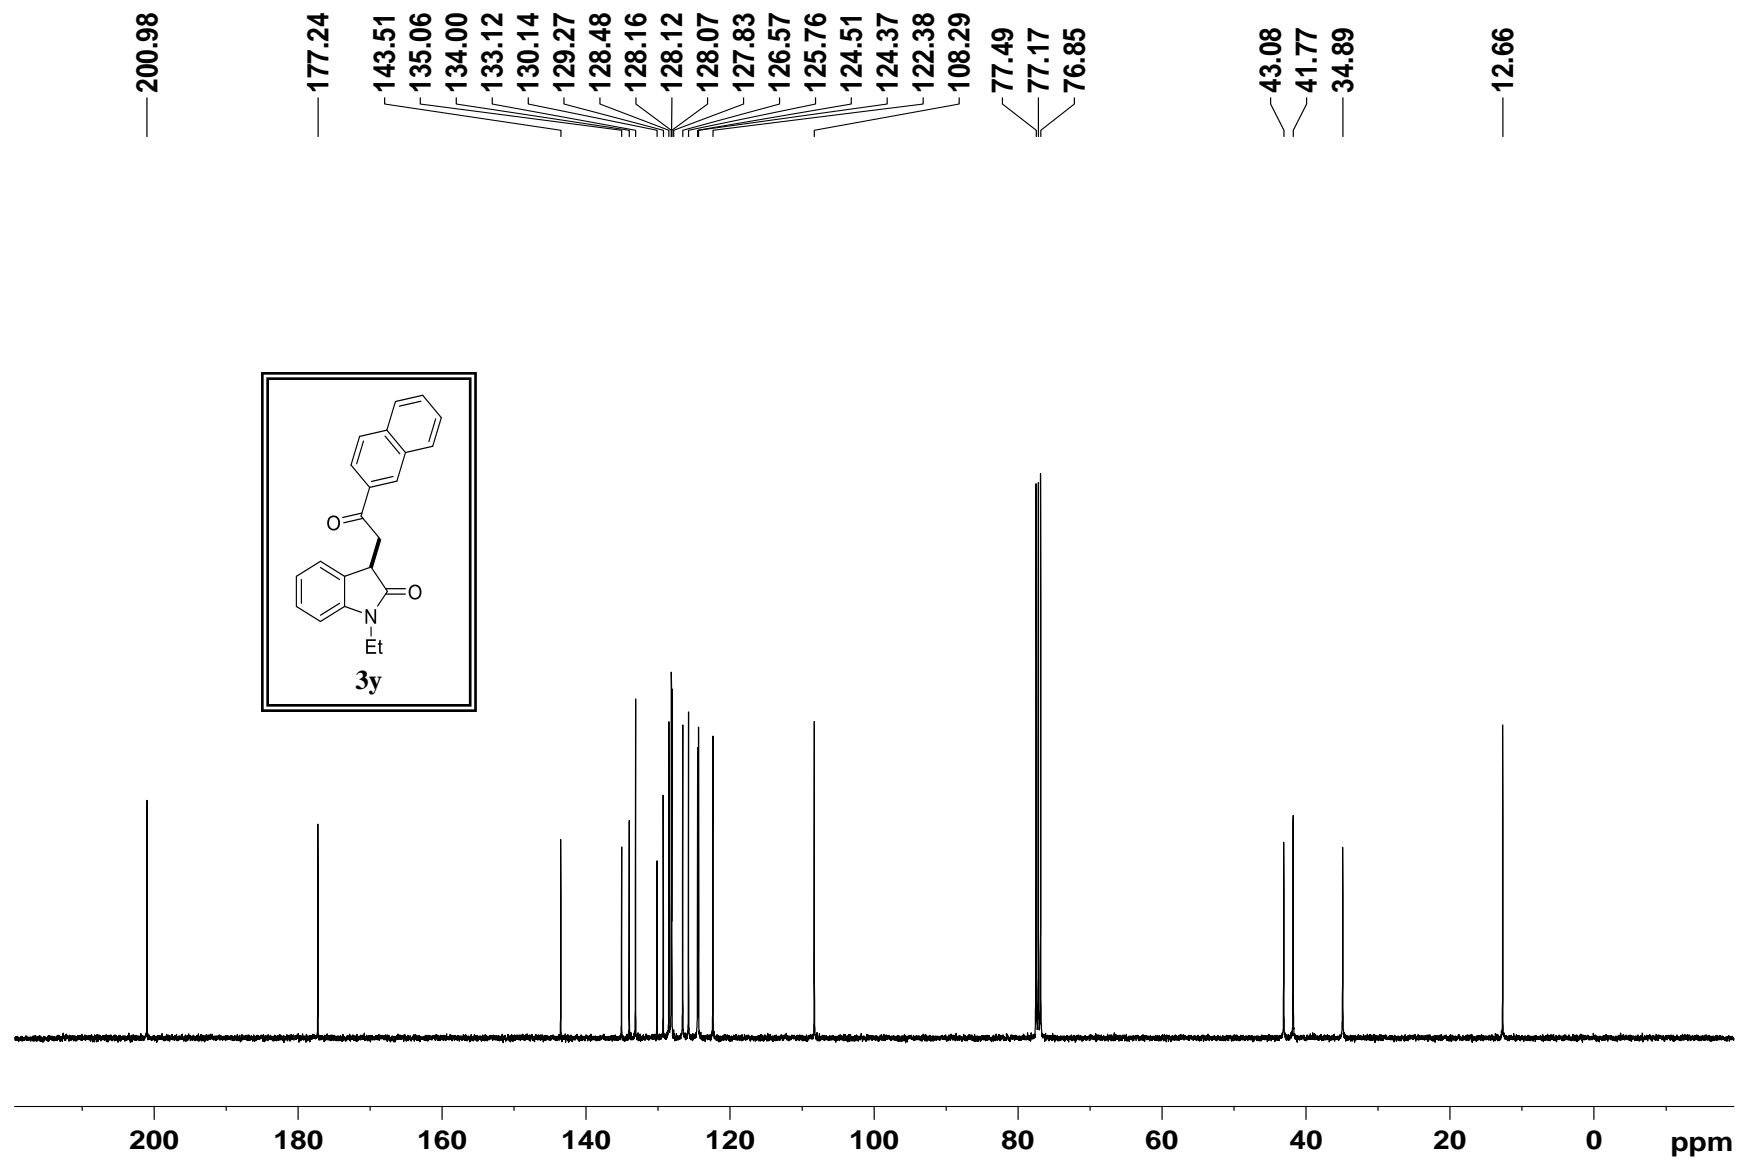

<sup>1</sup>H NMR spectrum of **3z**

apr-339 PROTON CDC13 8/10/2018

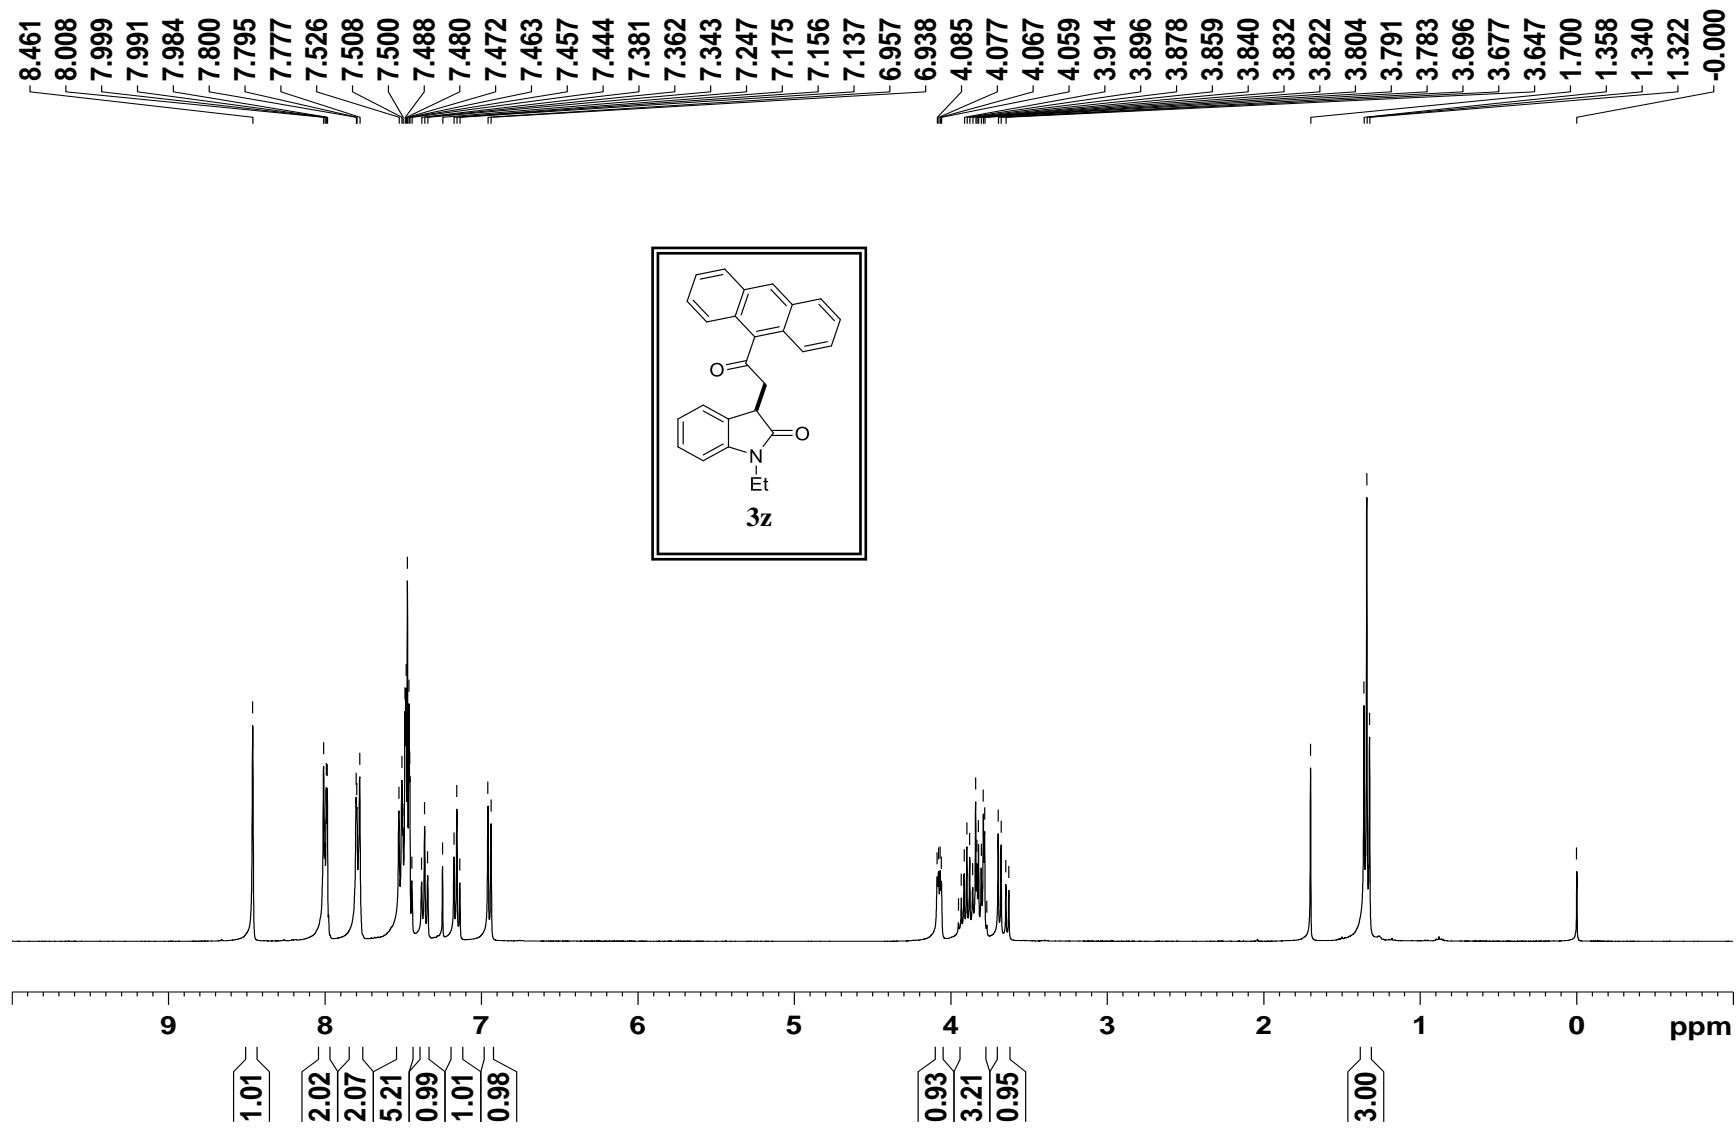

<sup>13</sup>C NMR spectrum of **3z**

apr-339 C13CPD CDC13 8/10/2018

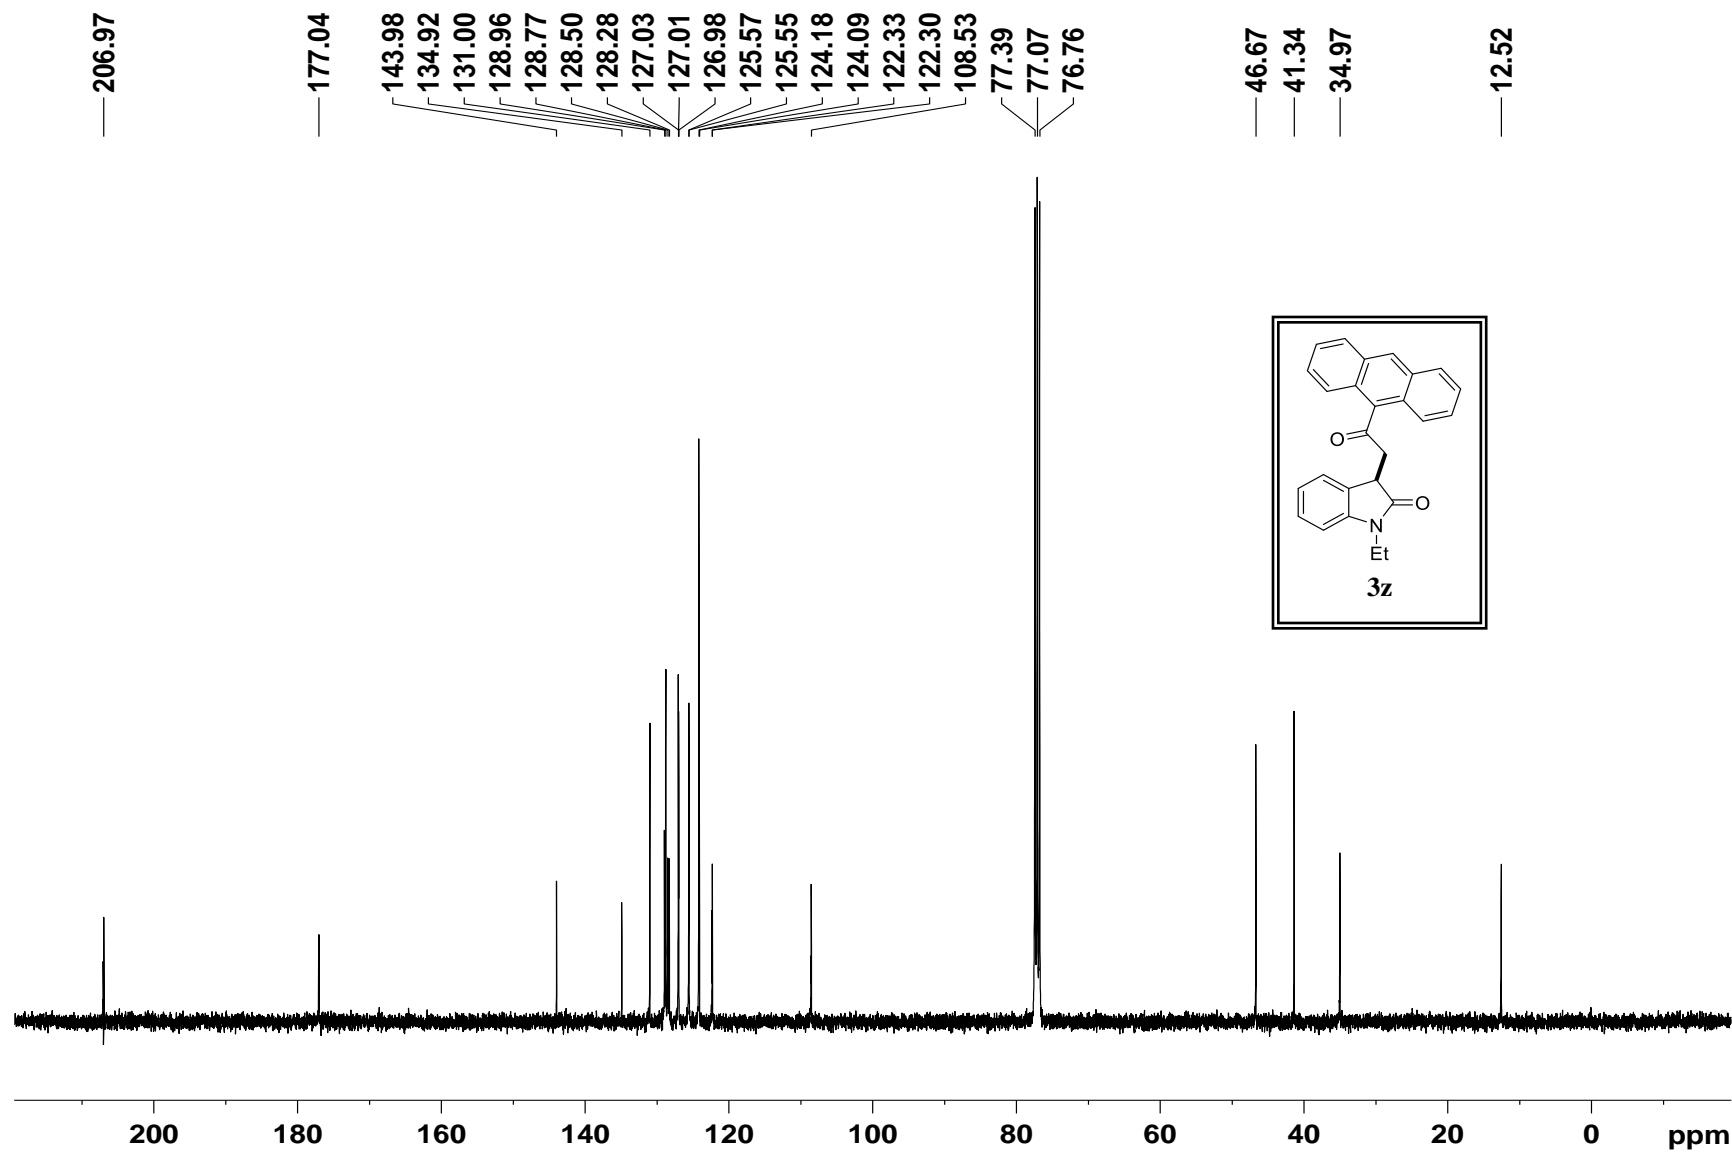

<sup>1</sup>H NMR spectrum of **3aa**

APR-747 a PROTON CDC13 12.08.2021

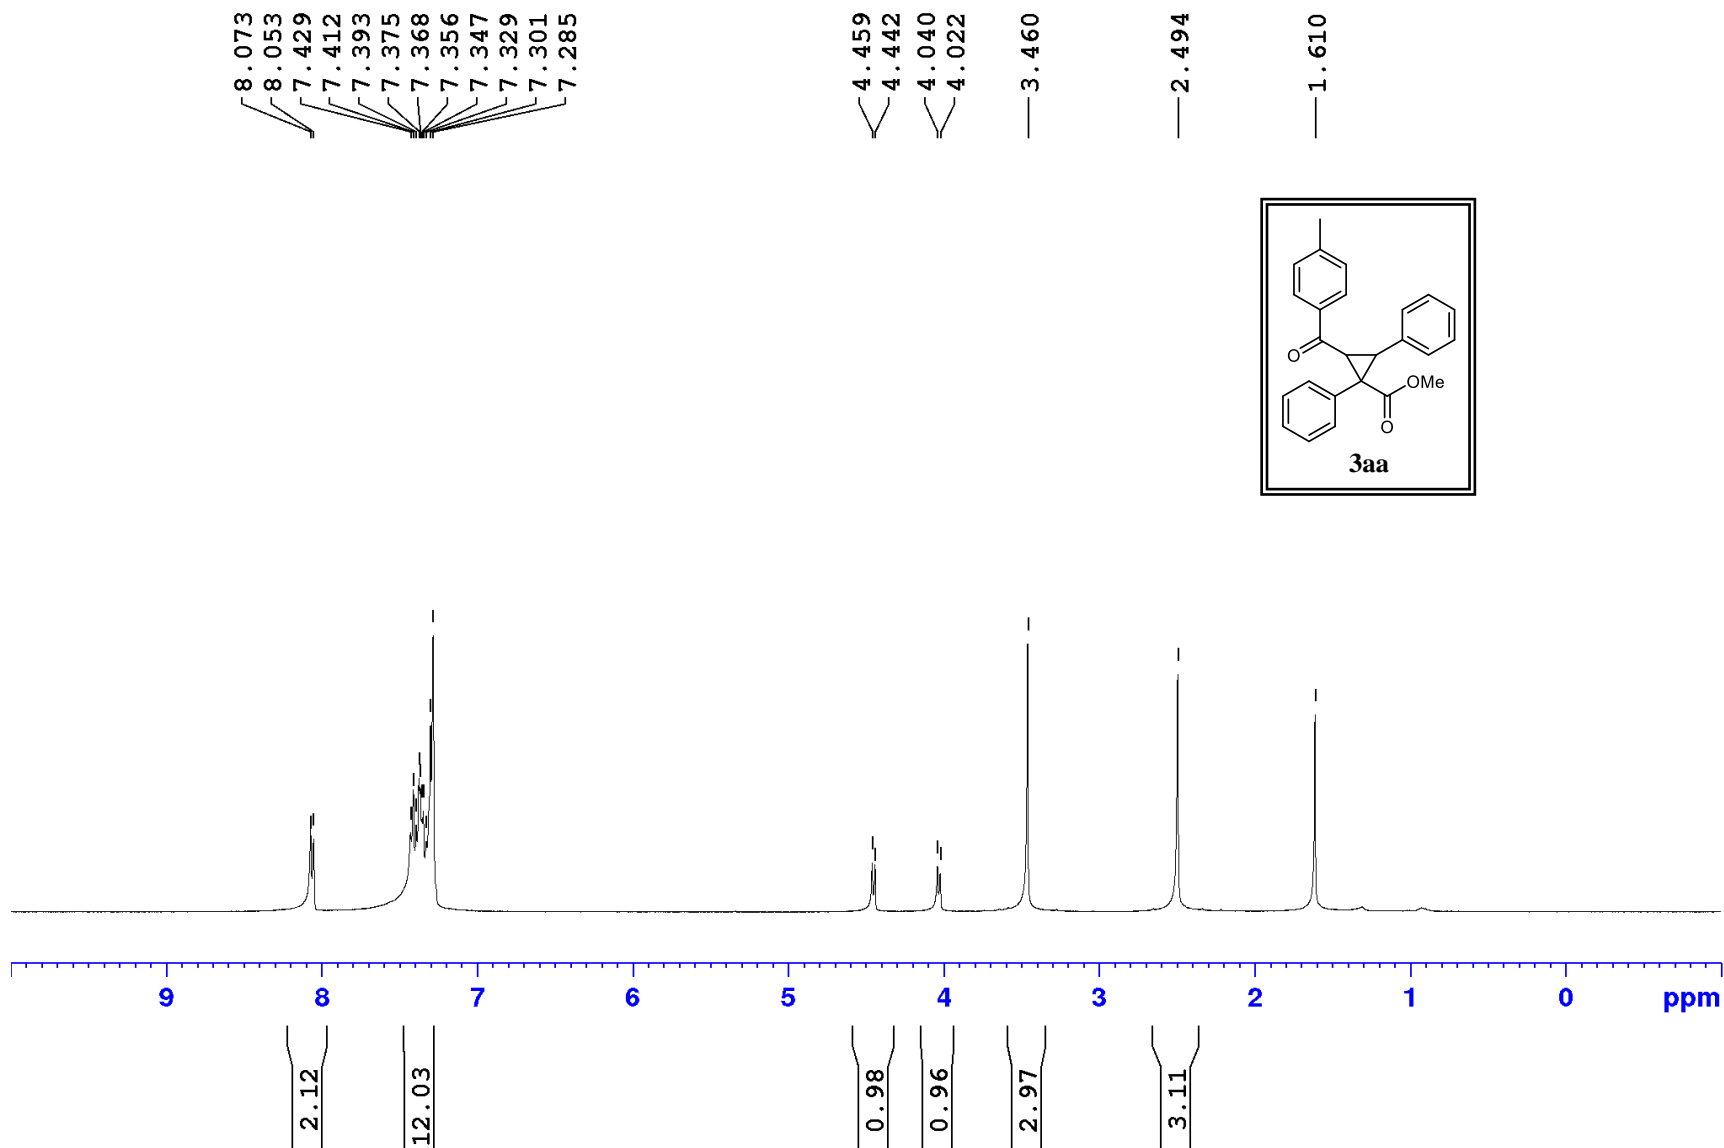

<sup>13</sup>C NMR spectrum of **3aa**

APR-747 a C13CPD CDC13 12.08.2021

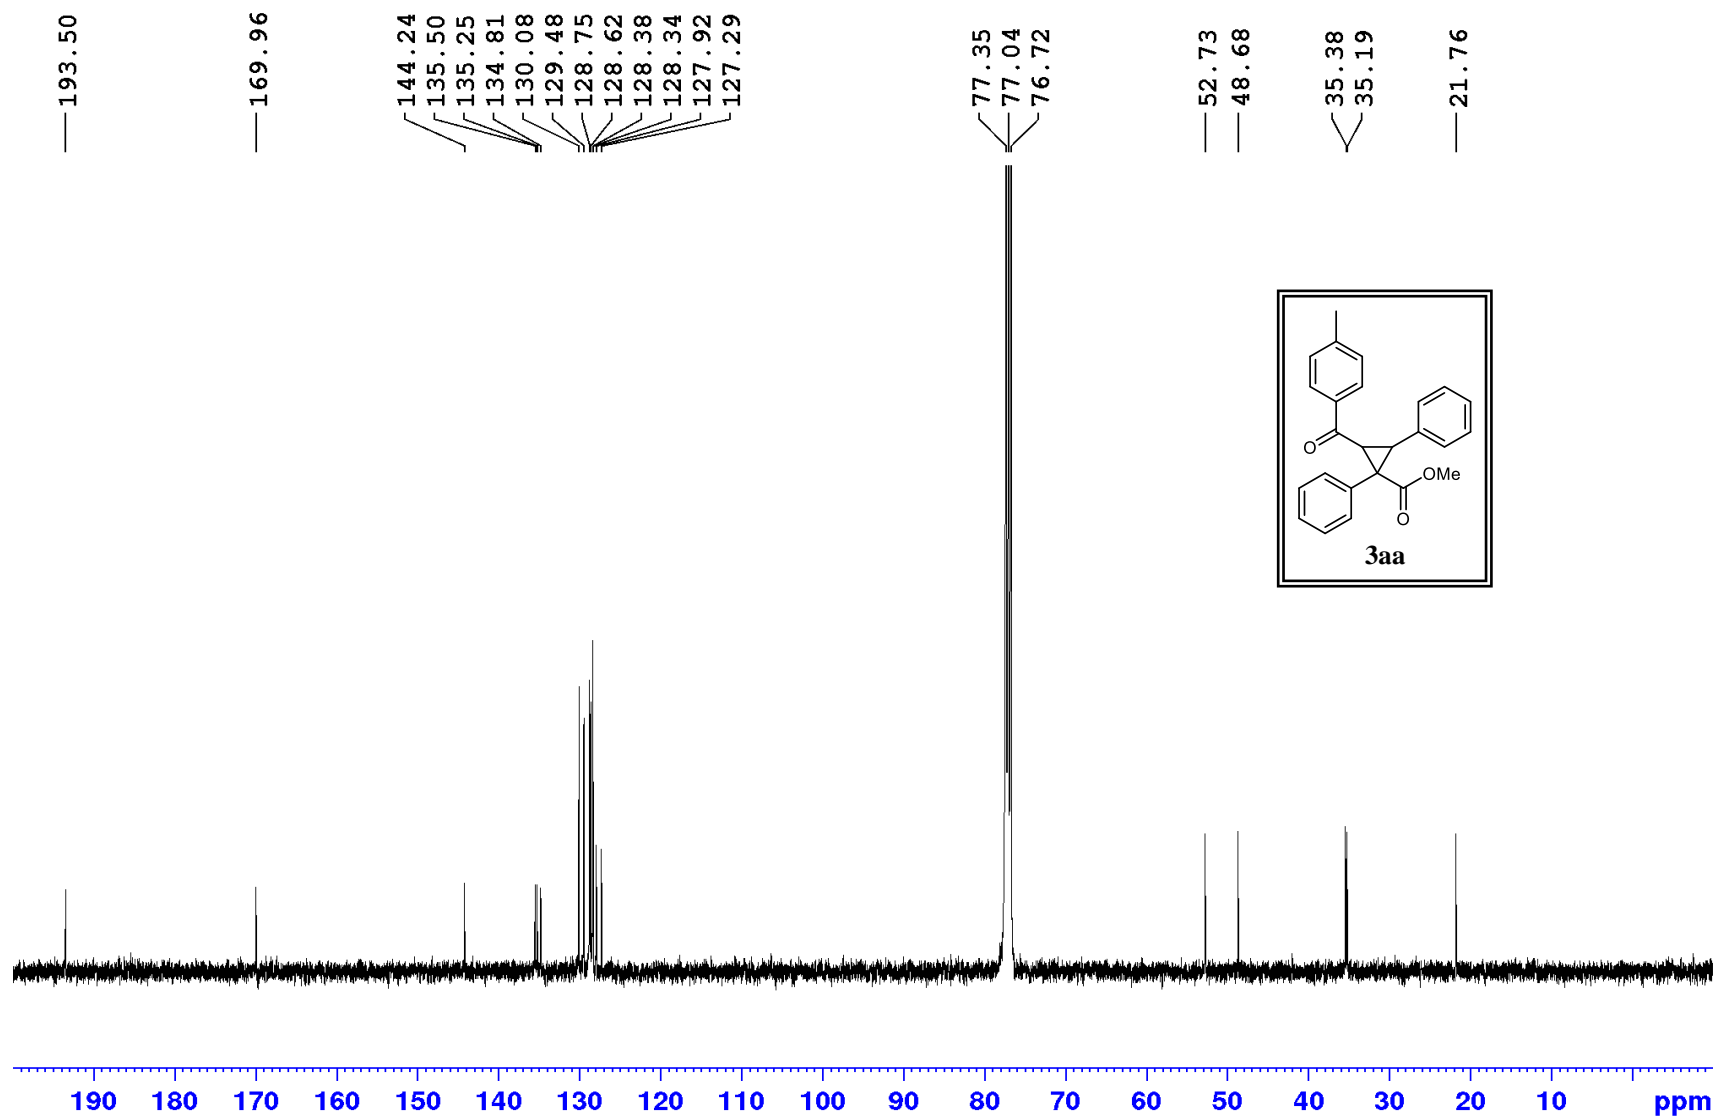



<sup>1</sup>H NMR spectrum of **6a**

apr-489 PROTON CDCl<sub>3</sub> 12/07/2019

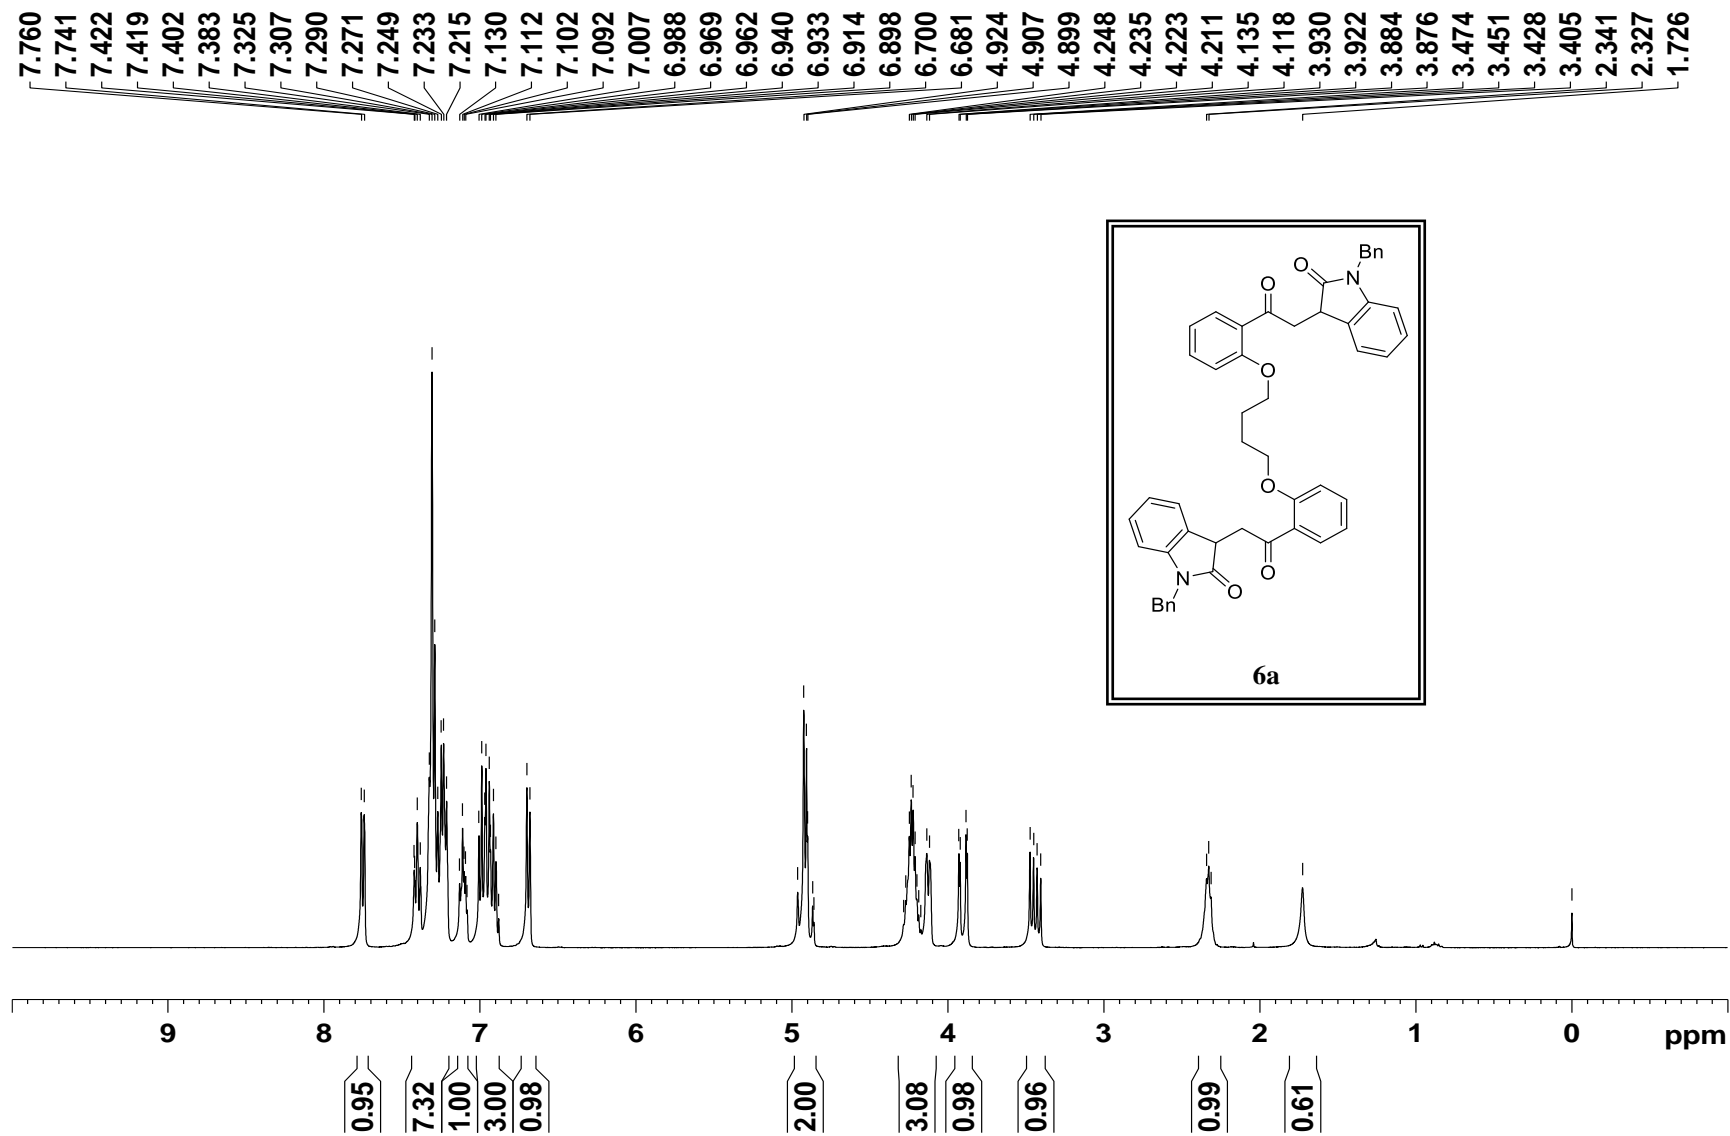

<sup>13</sup>C NMR spectrum of **6a**

apr-489 C13CPD CDC13 12/07/2019

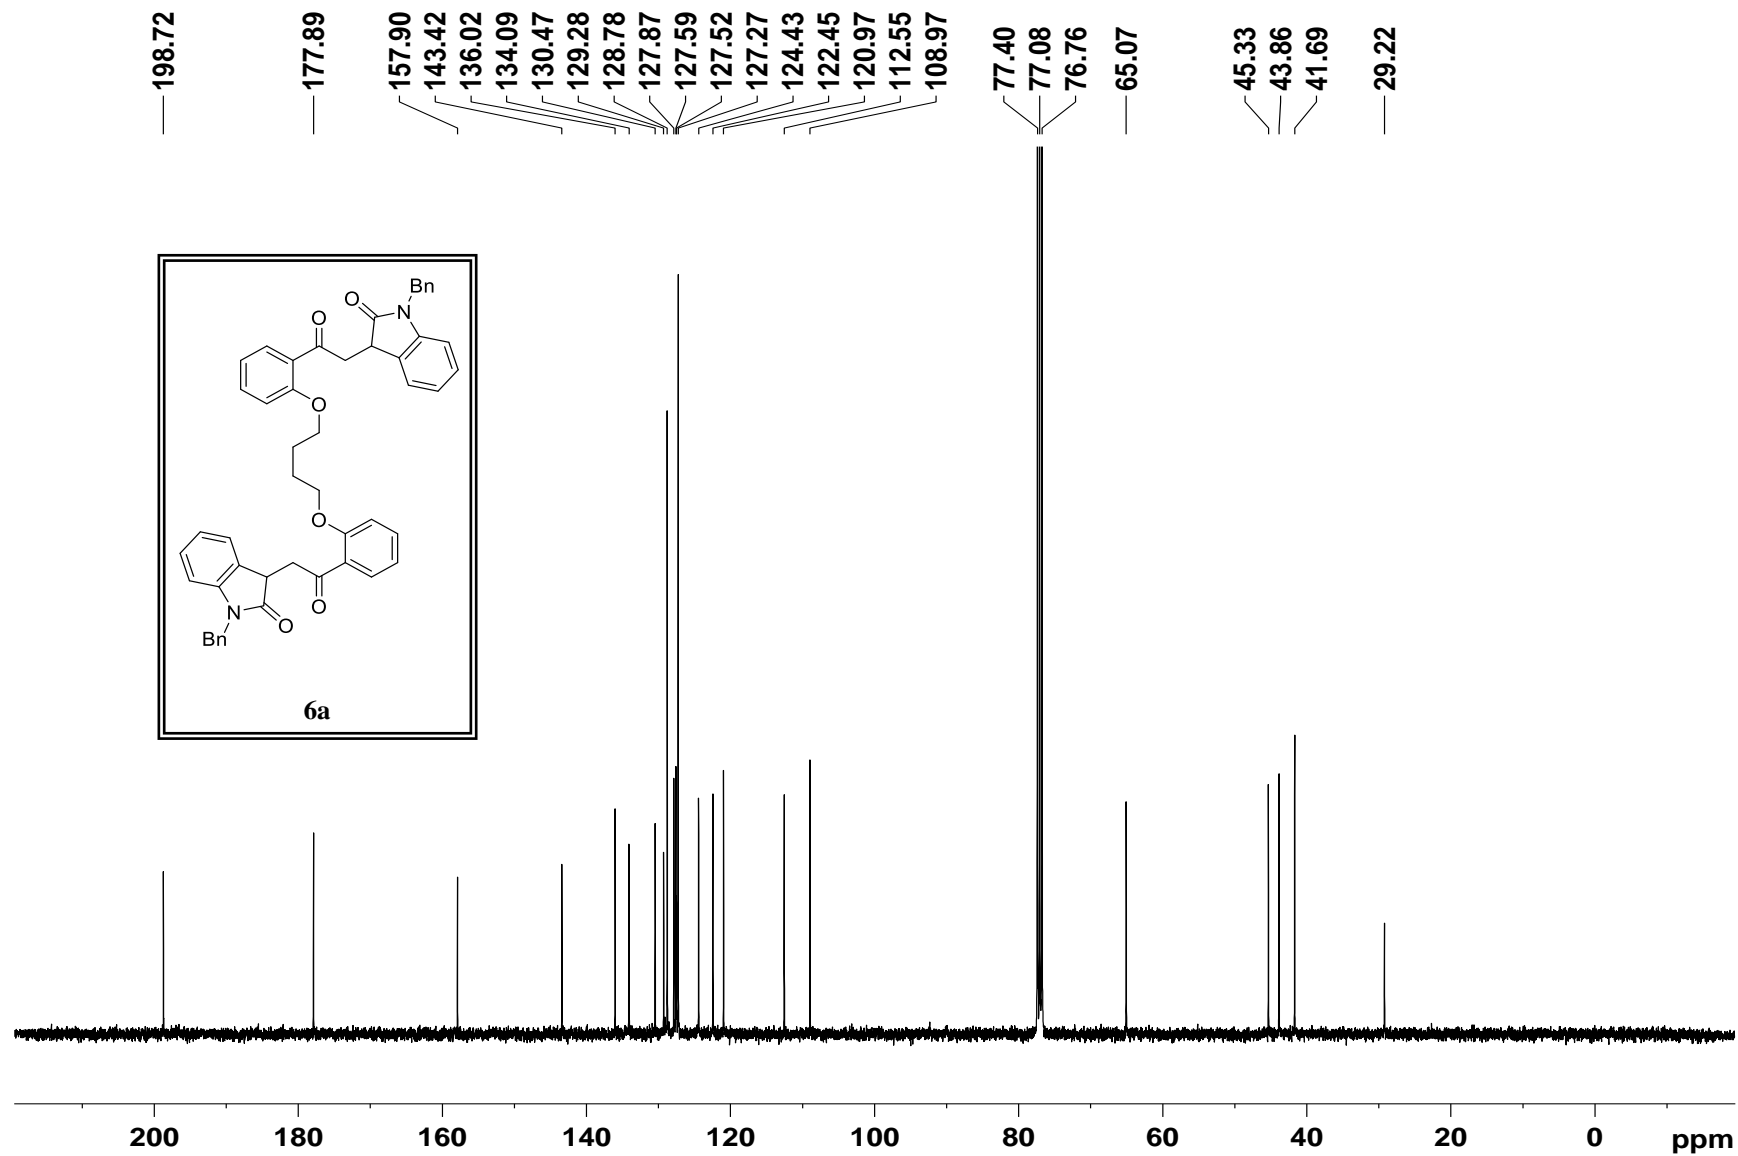

<sup>1</sup>H NMR spectrum of **6b**

apr-349 PROTON CDCl<sub>3</sub> 30/10/2018

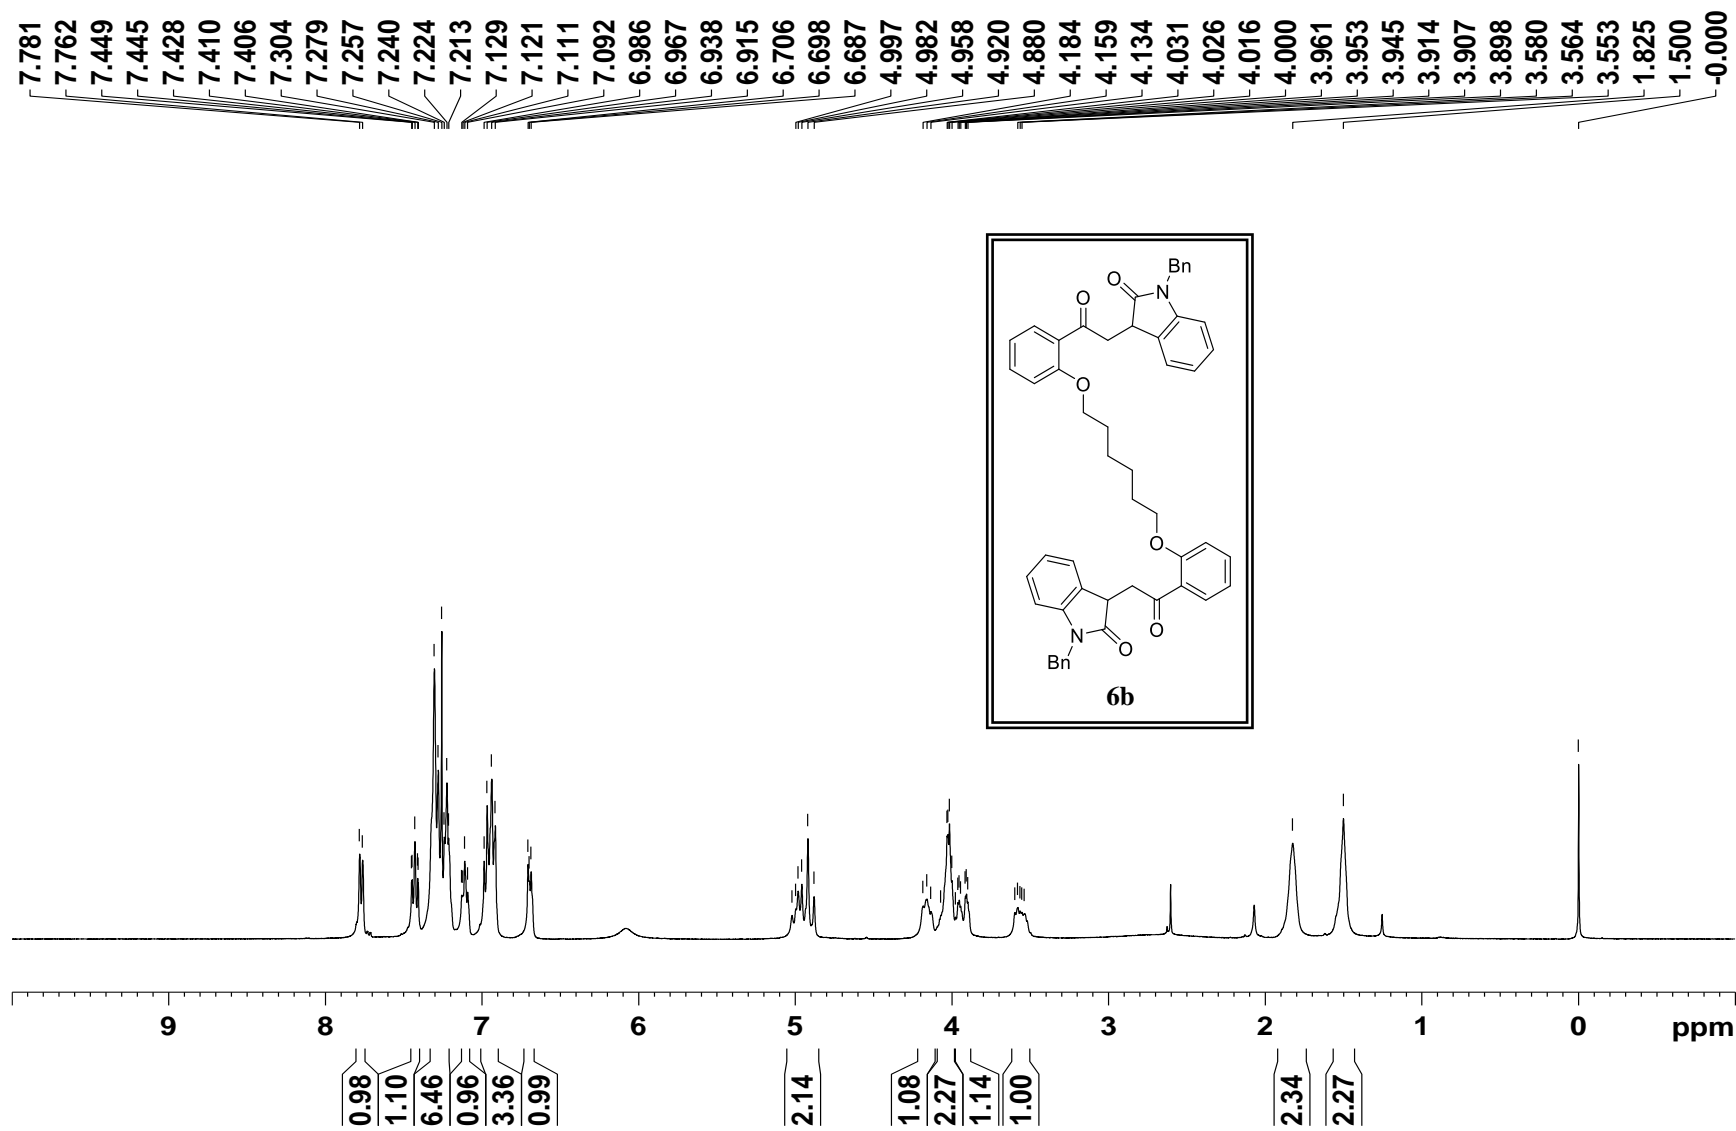

<sup>13</sup>C NMR spectrum of **6b**

apr-349 C13CPD CDC13 30/10/2018

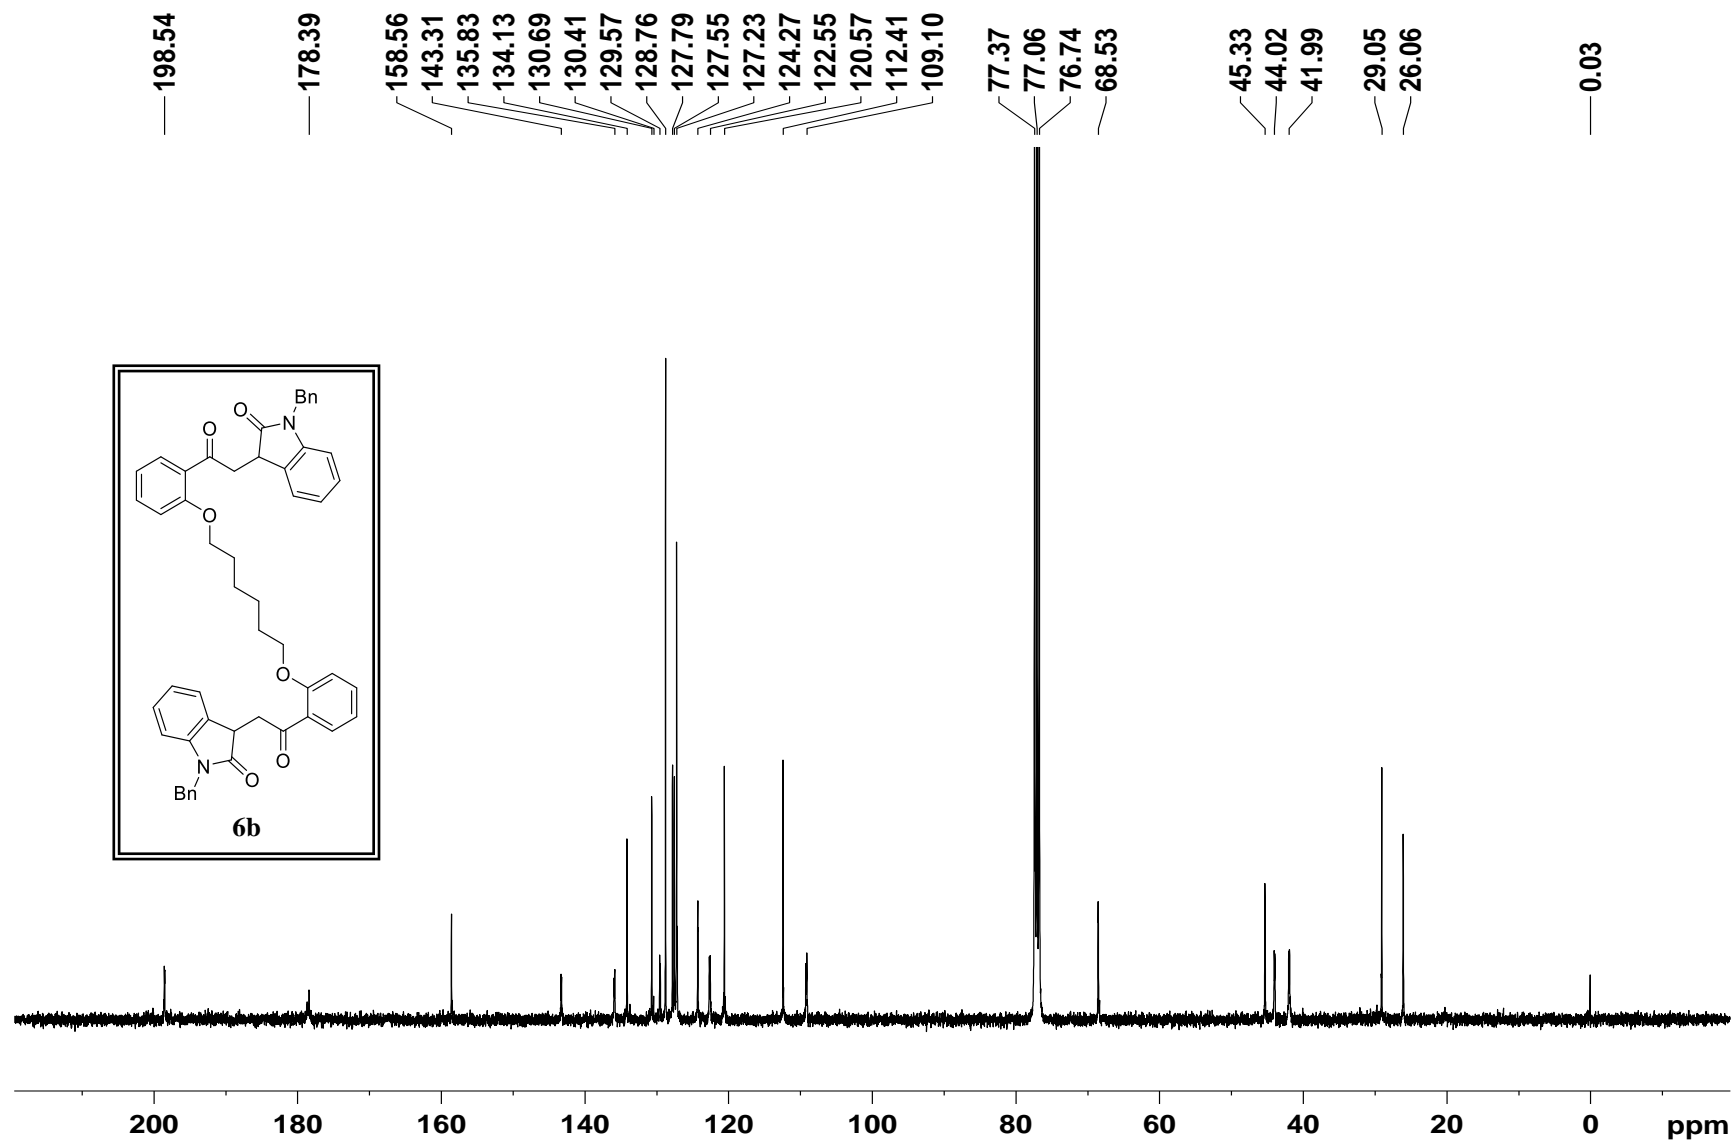

<sup>1</sup>H NMR spectrum of **7a**

apr-488 PROTON CDC13 2/8/2019

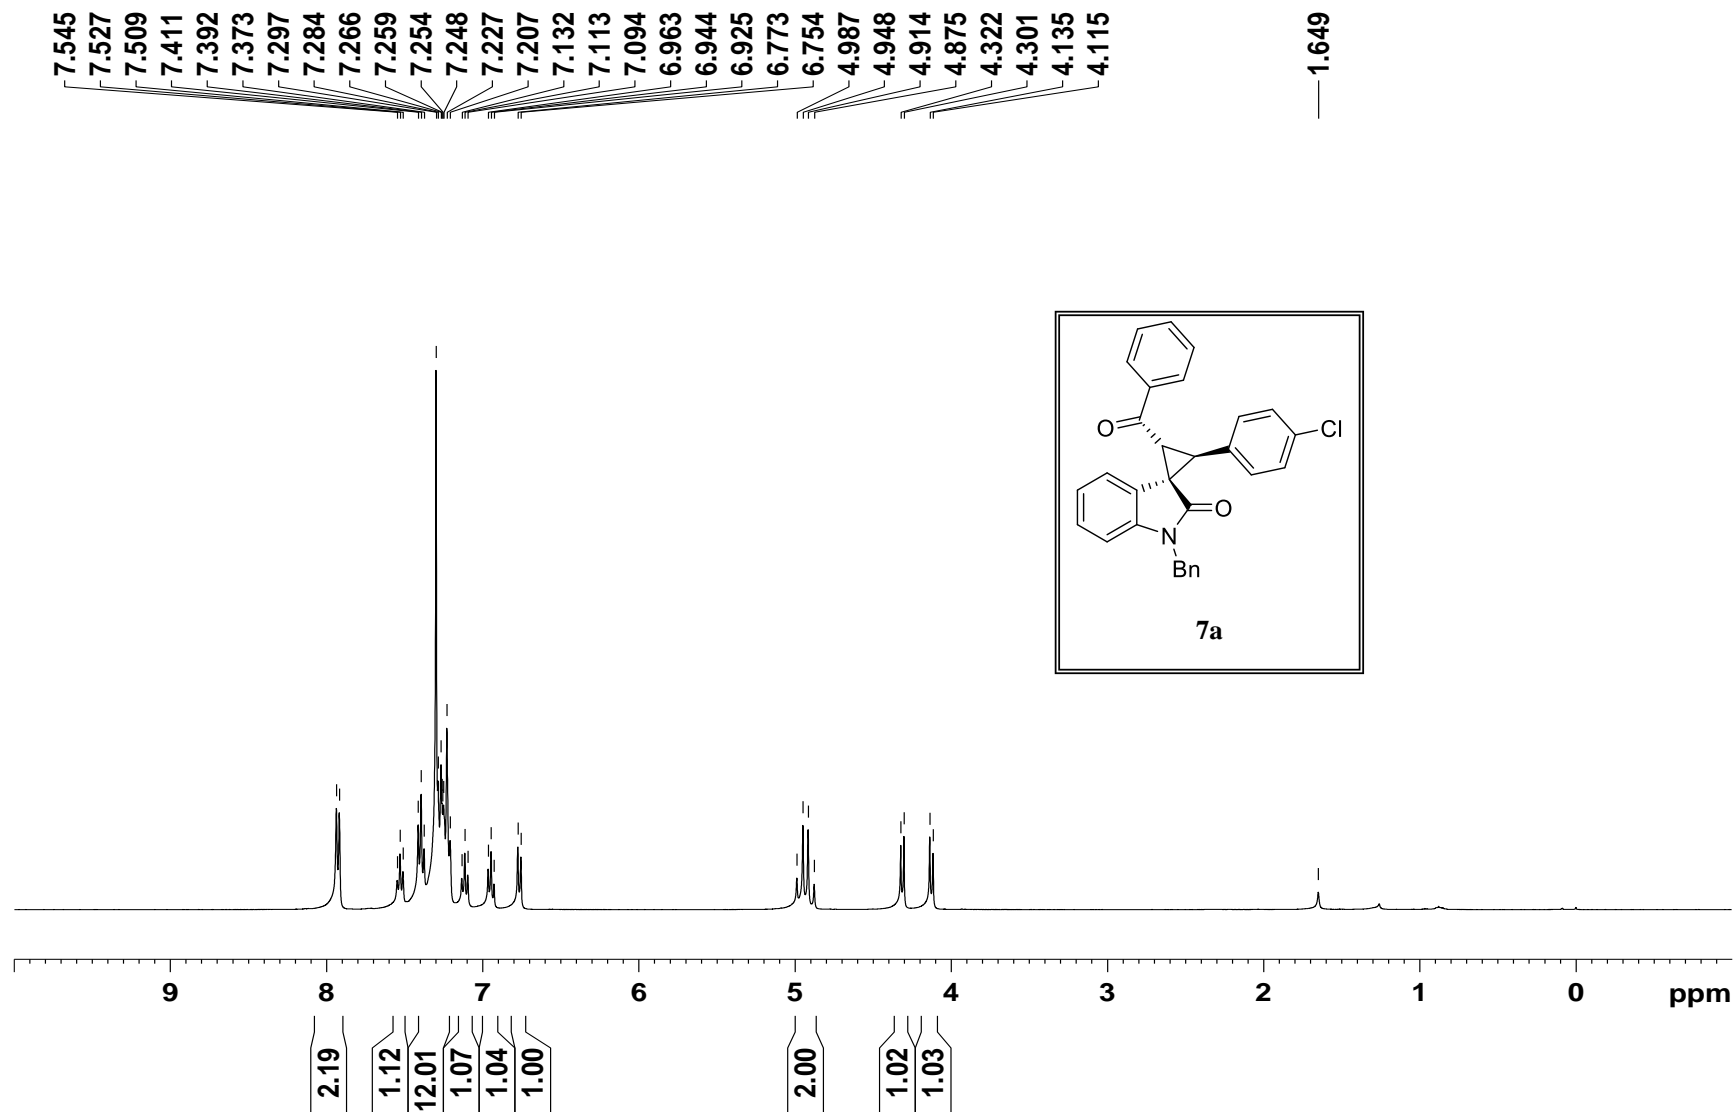

<sup>13</sup>C NMR spectrum of **7a**

apr-488 C13CPD CDC13 2/8/2019

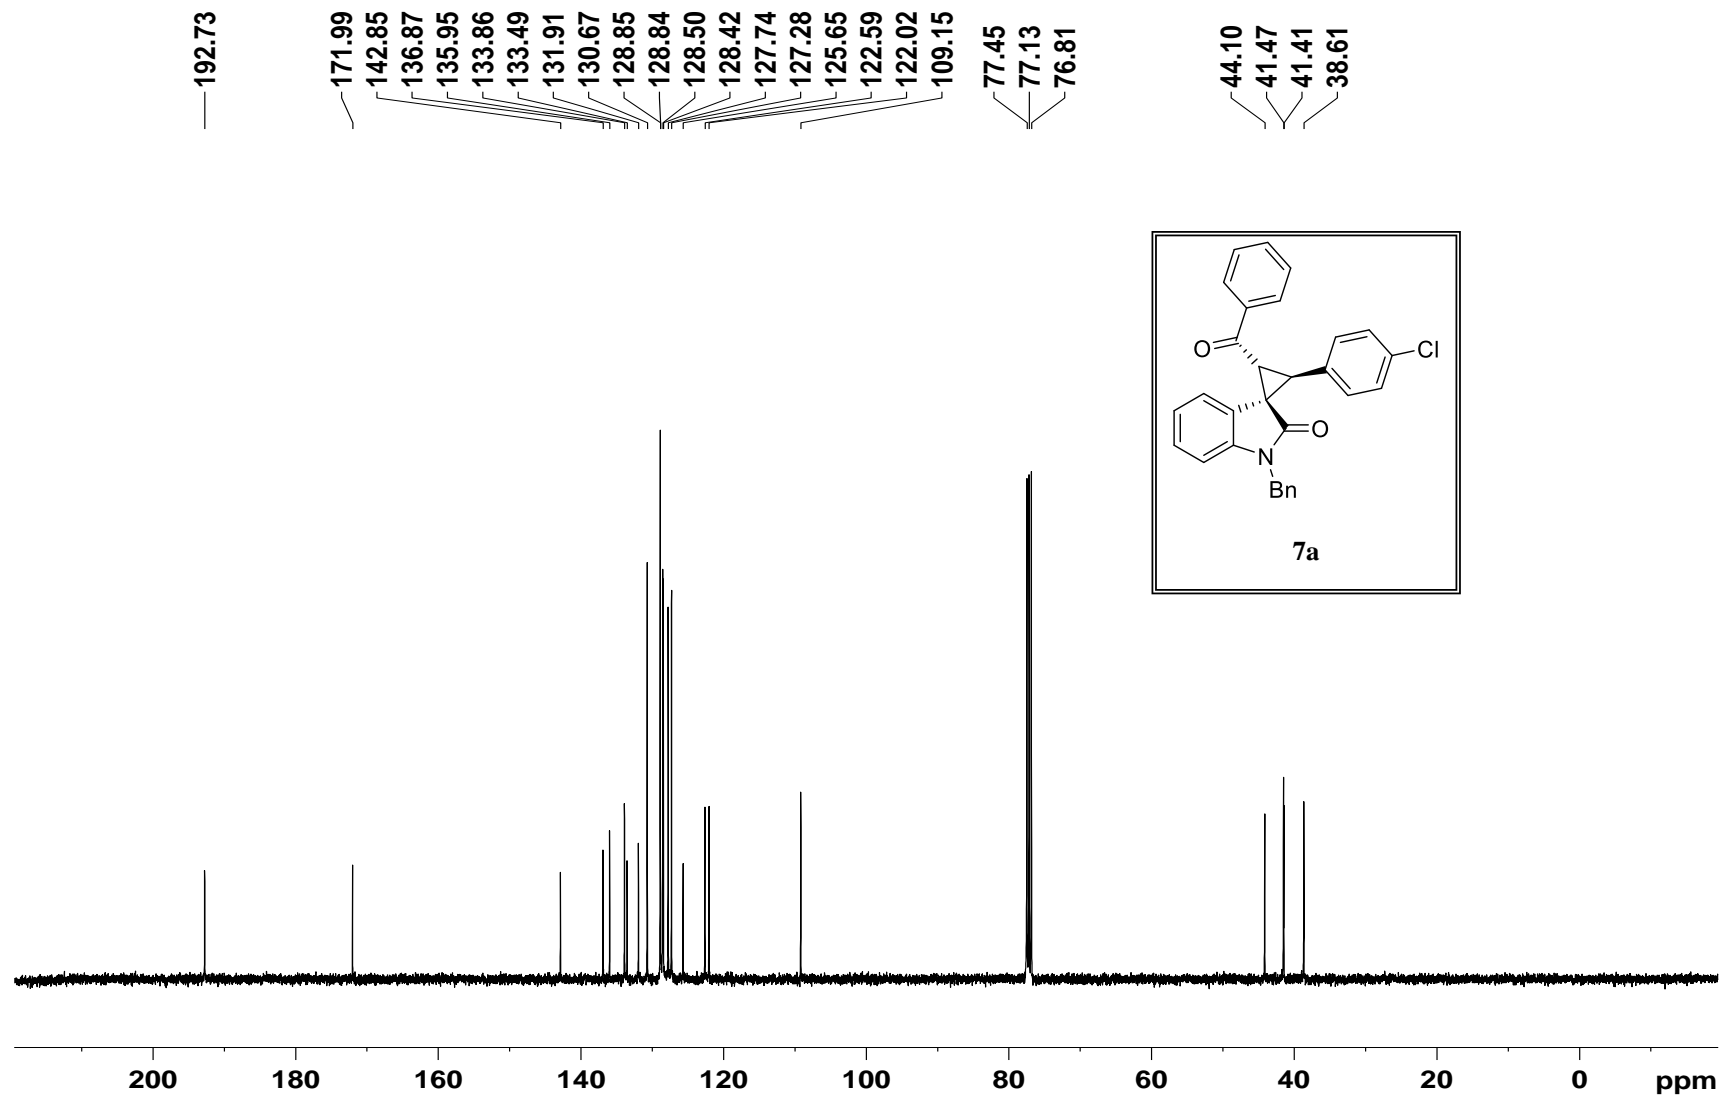

<sup>1</sup>H NMR spectrum of **7b**

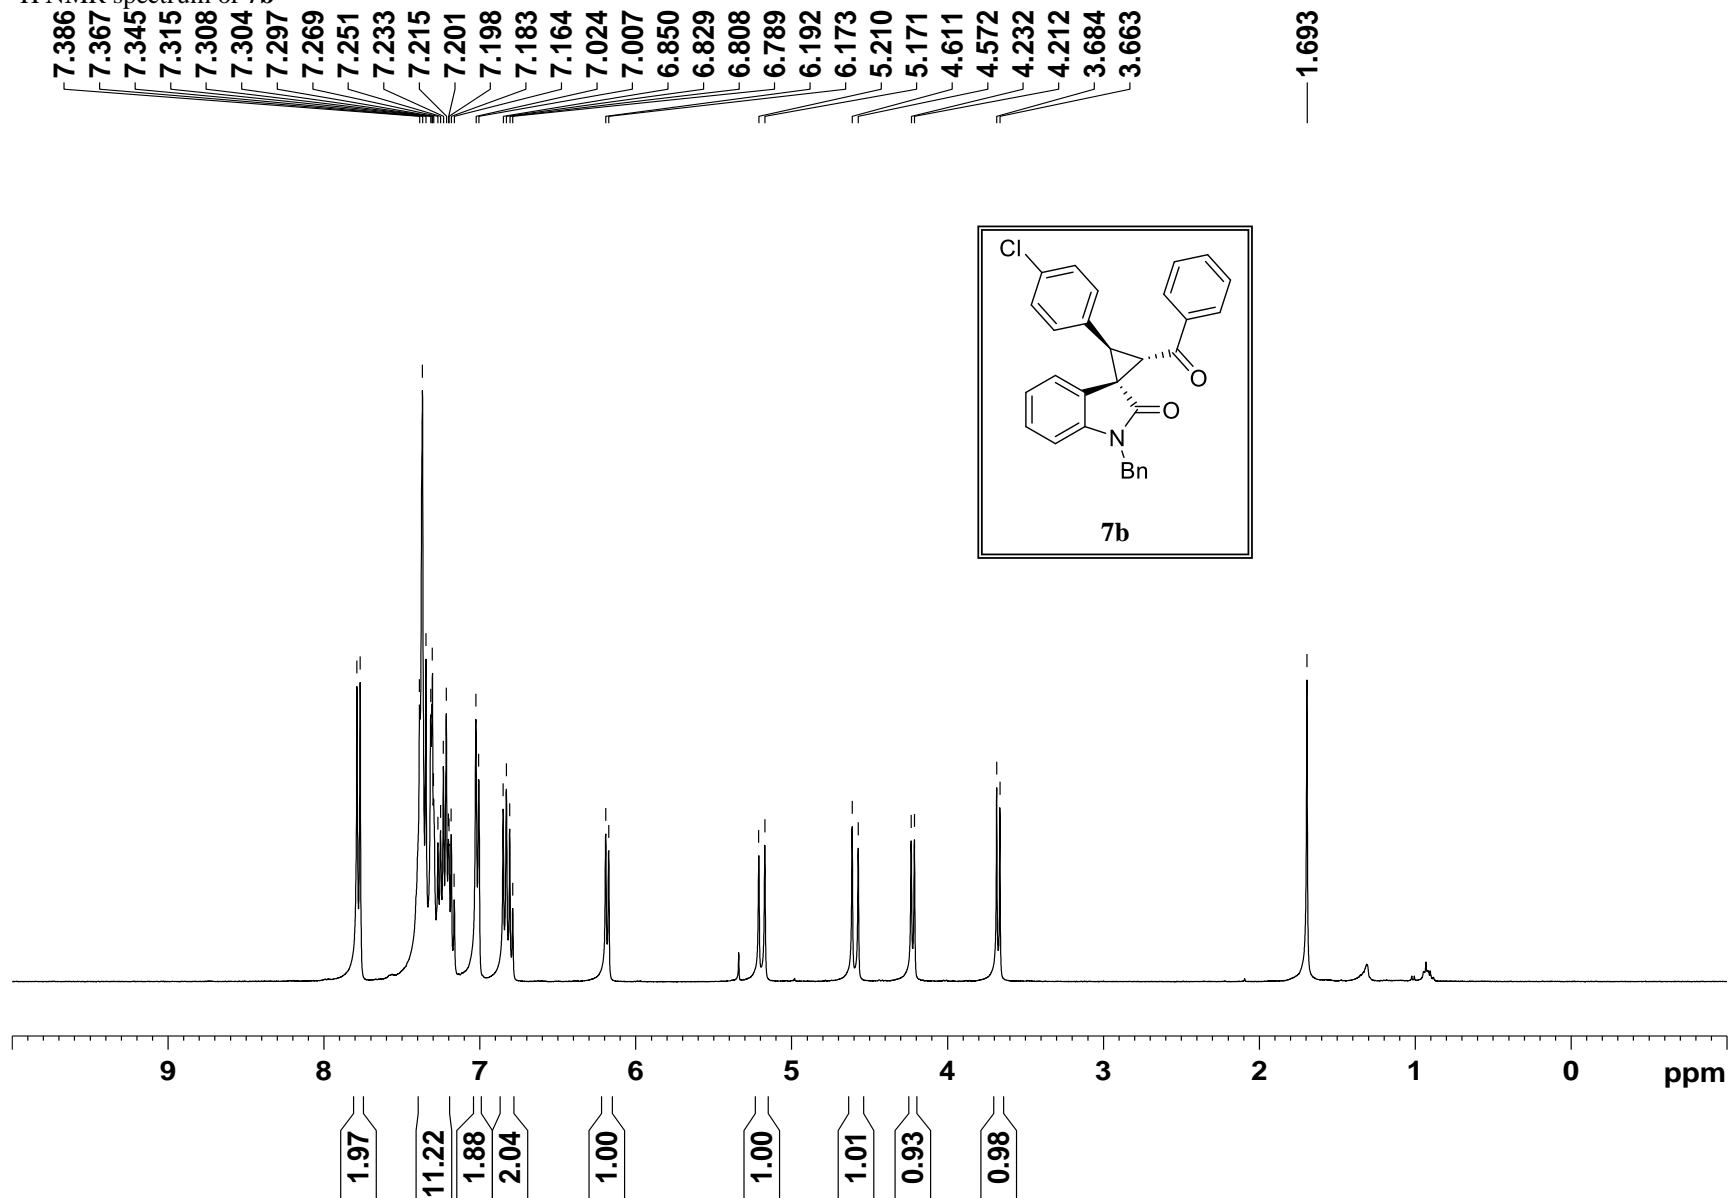

<sup>13</sup>C NMR spectrum of **7b**

APR-658 C13CPD CDC13 14/12/2020

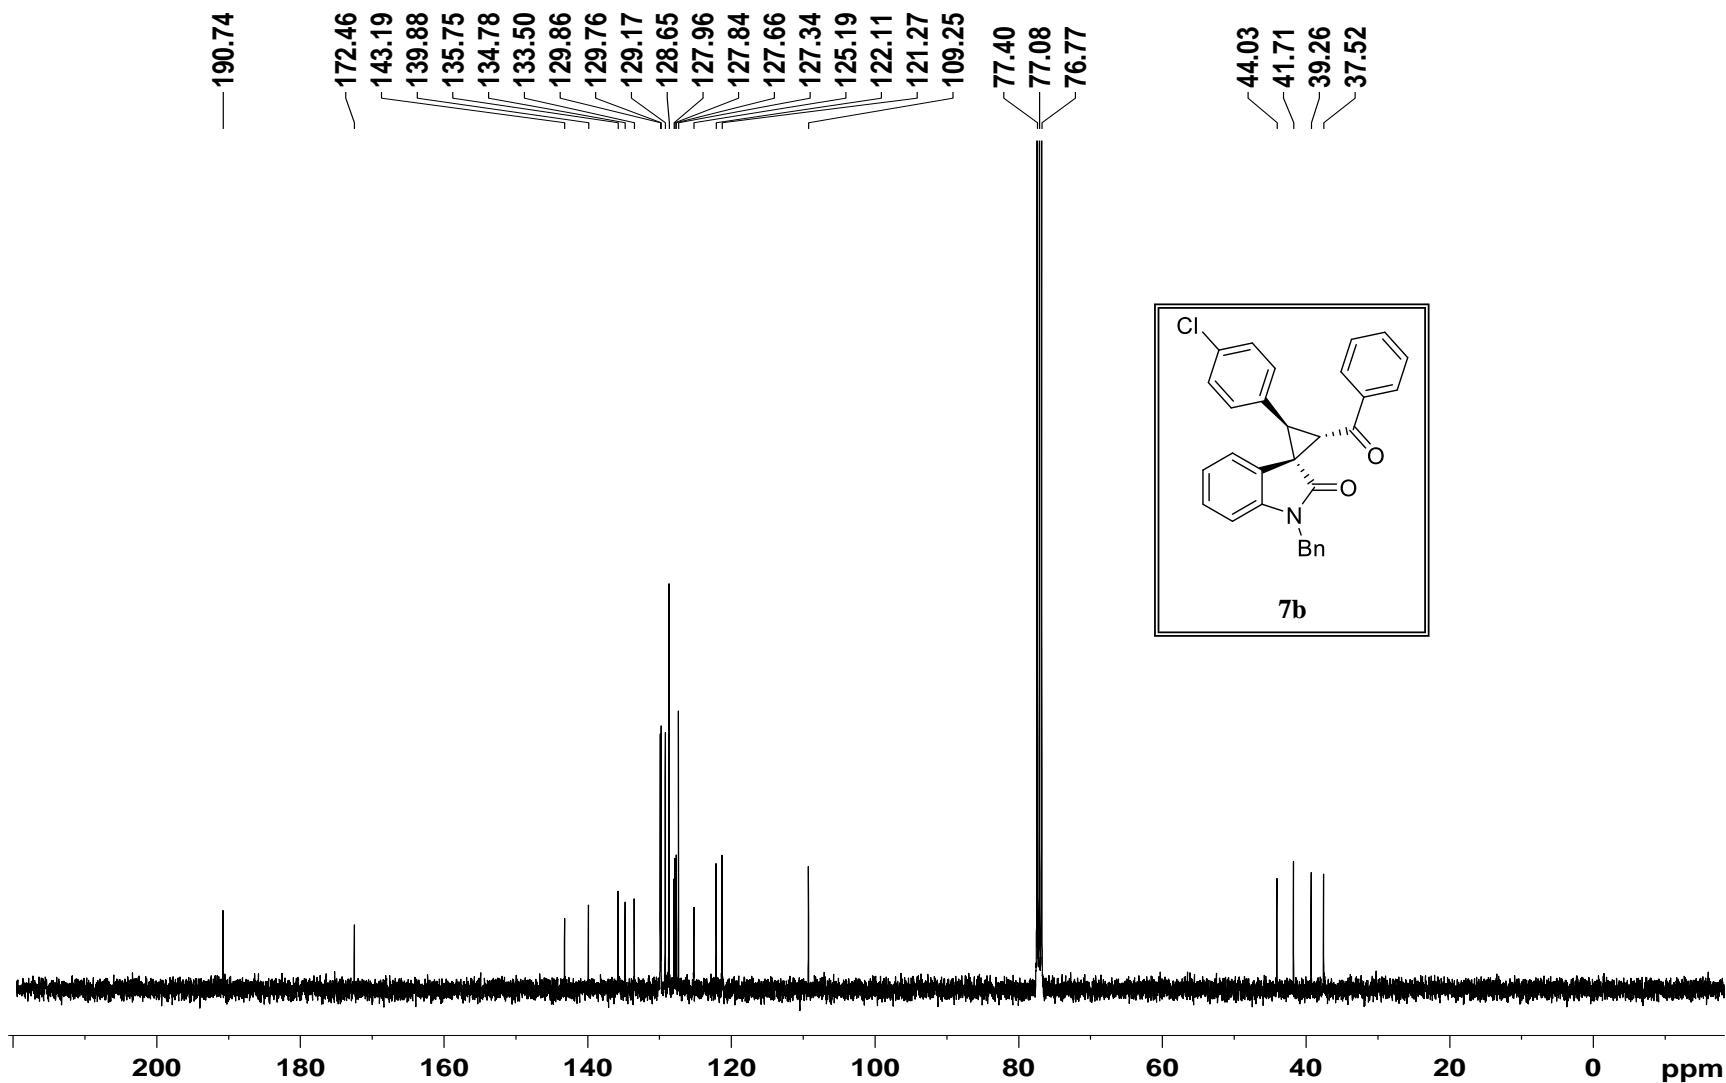



<sup>1</sup>H NMR spectrum of **9a**

apr-679 a PROTON CDC13 2/2/2021

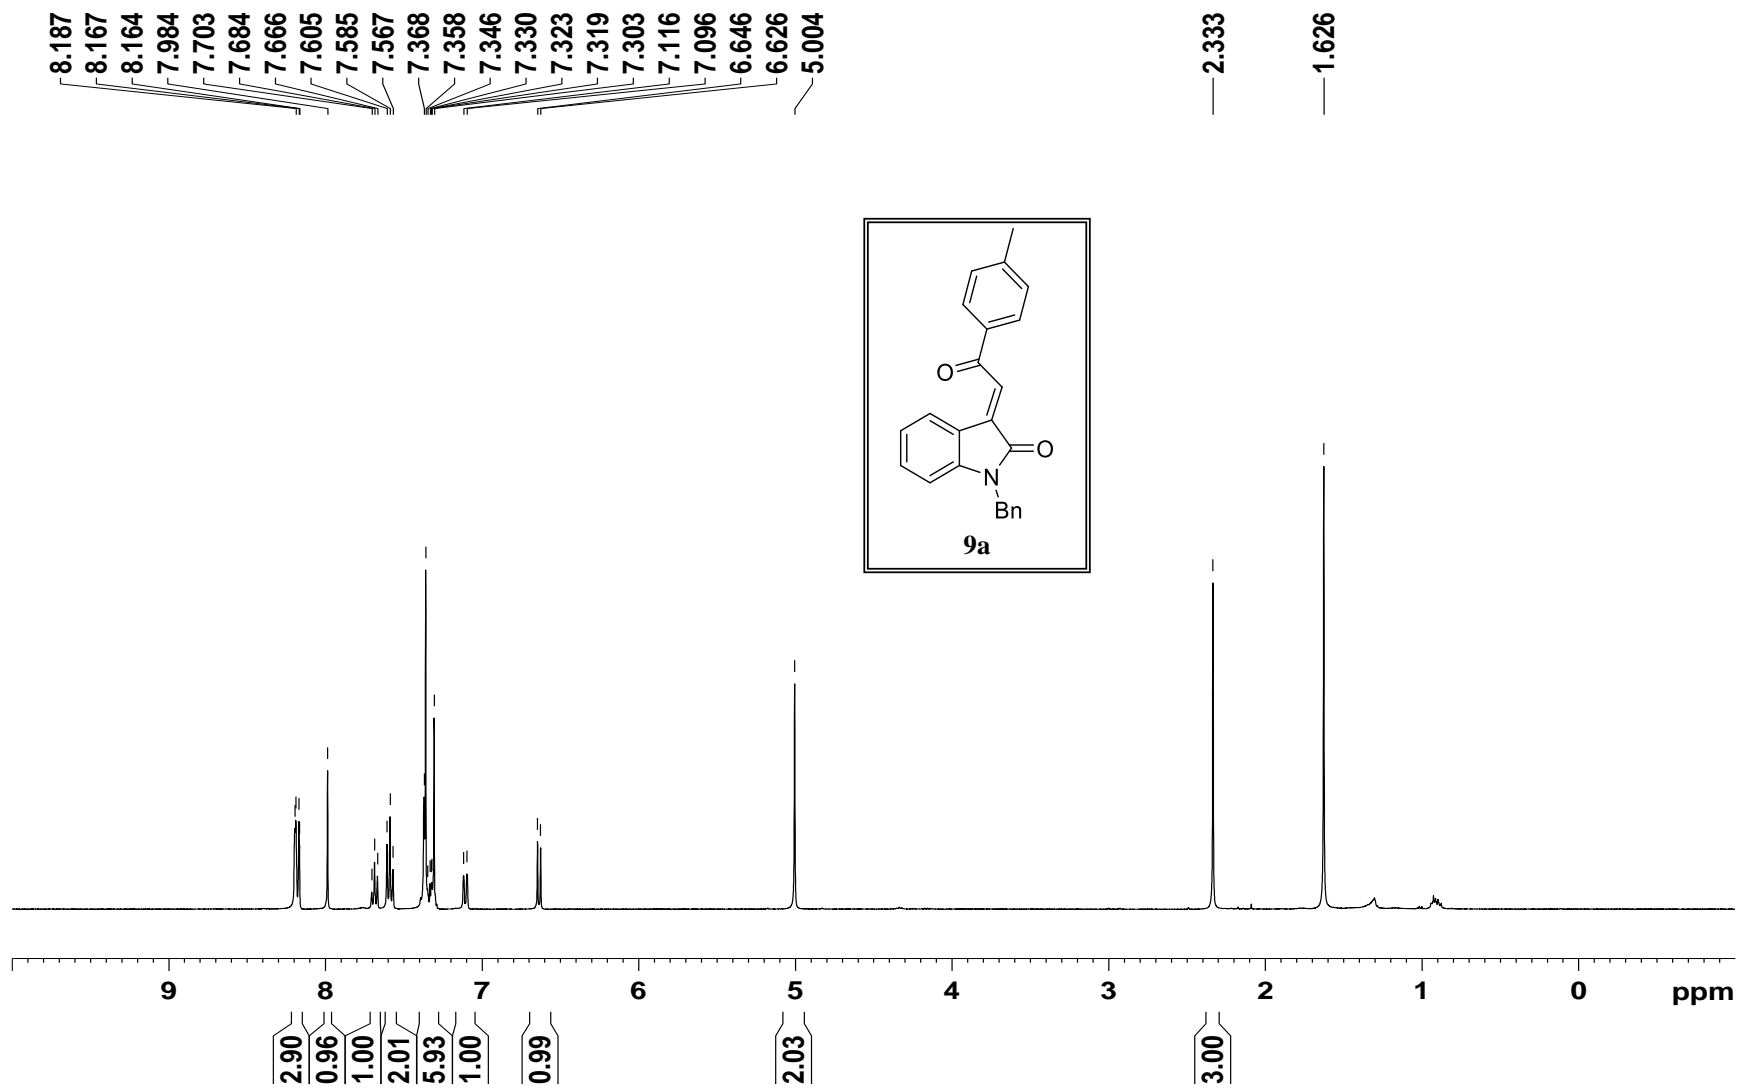

<sup>13</sup>C NMR spectrum of **9a**

apr-679 a C13CPD CDC13 2/2/2021

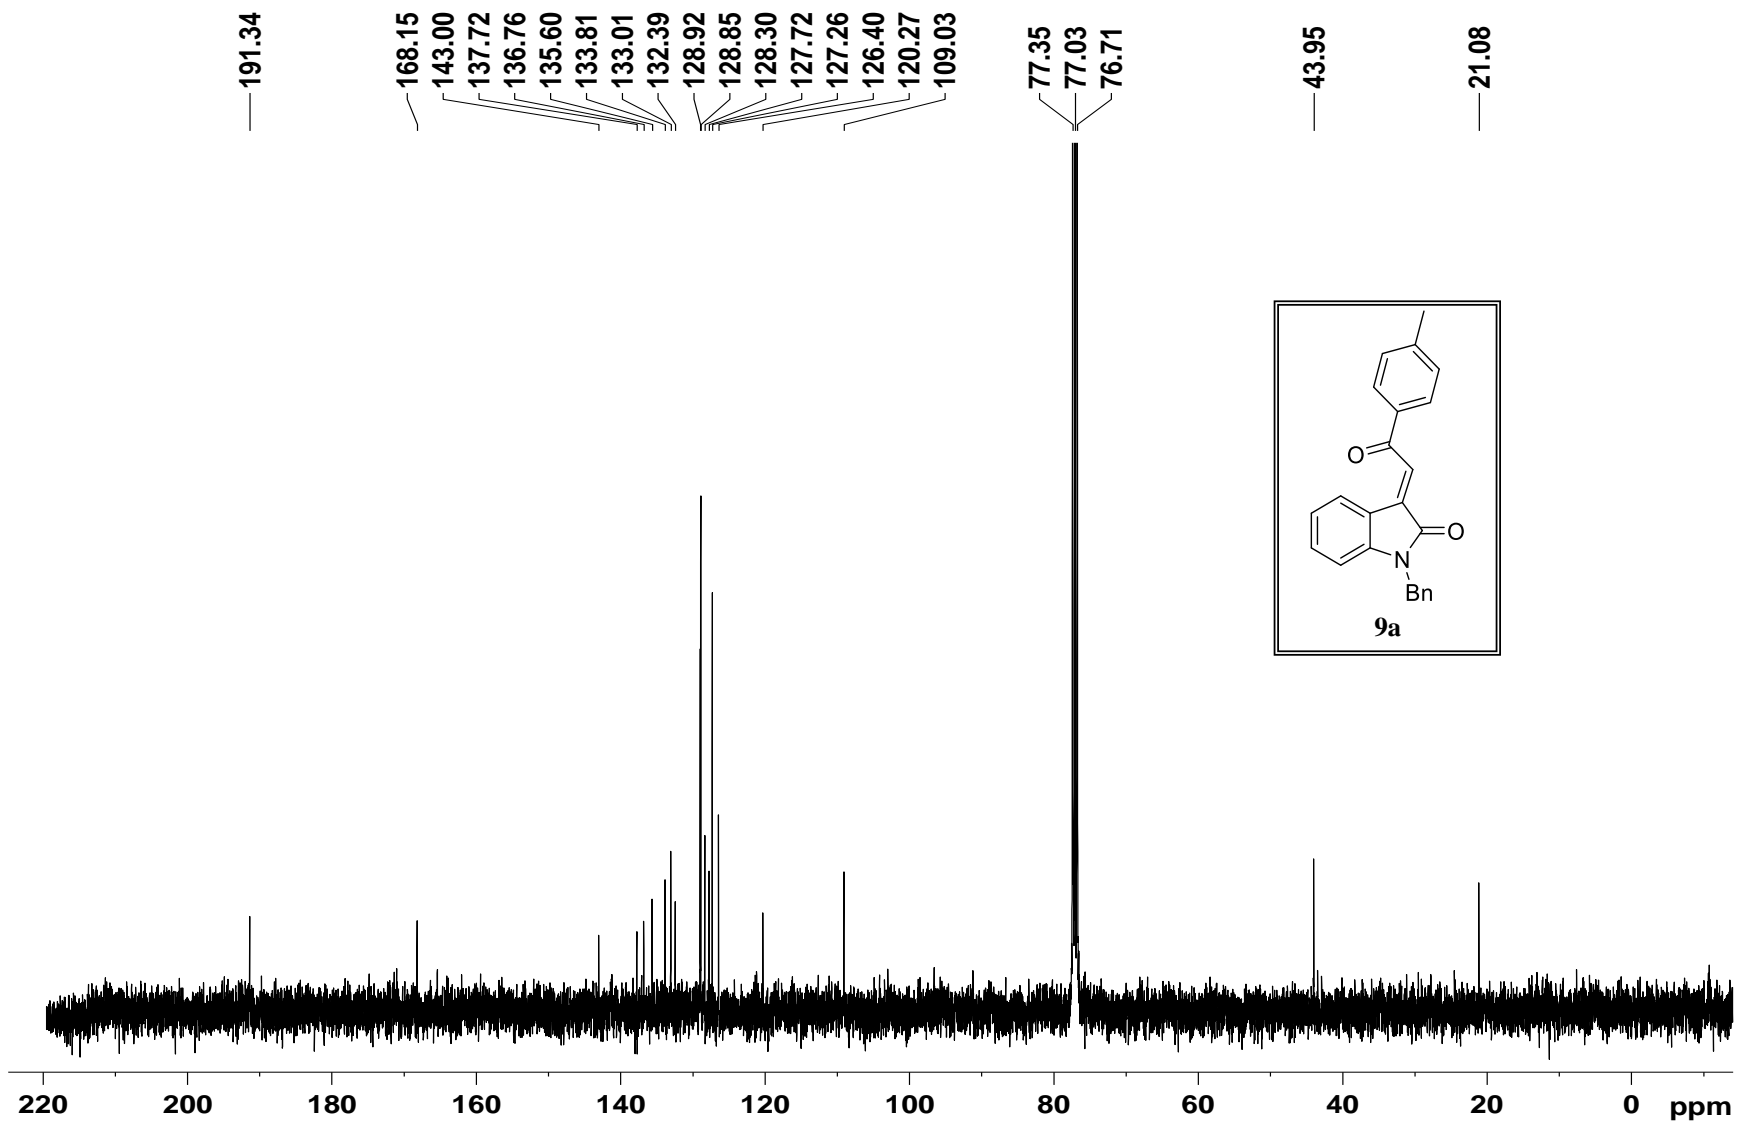

<sup>1</sup>H NMR spectrum of **10a**

Apr-512 PROTON CDC13 6/9/2019

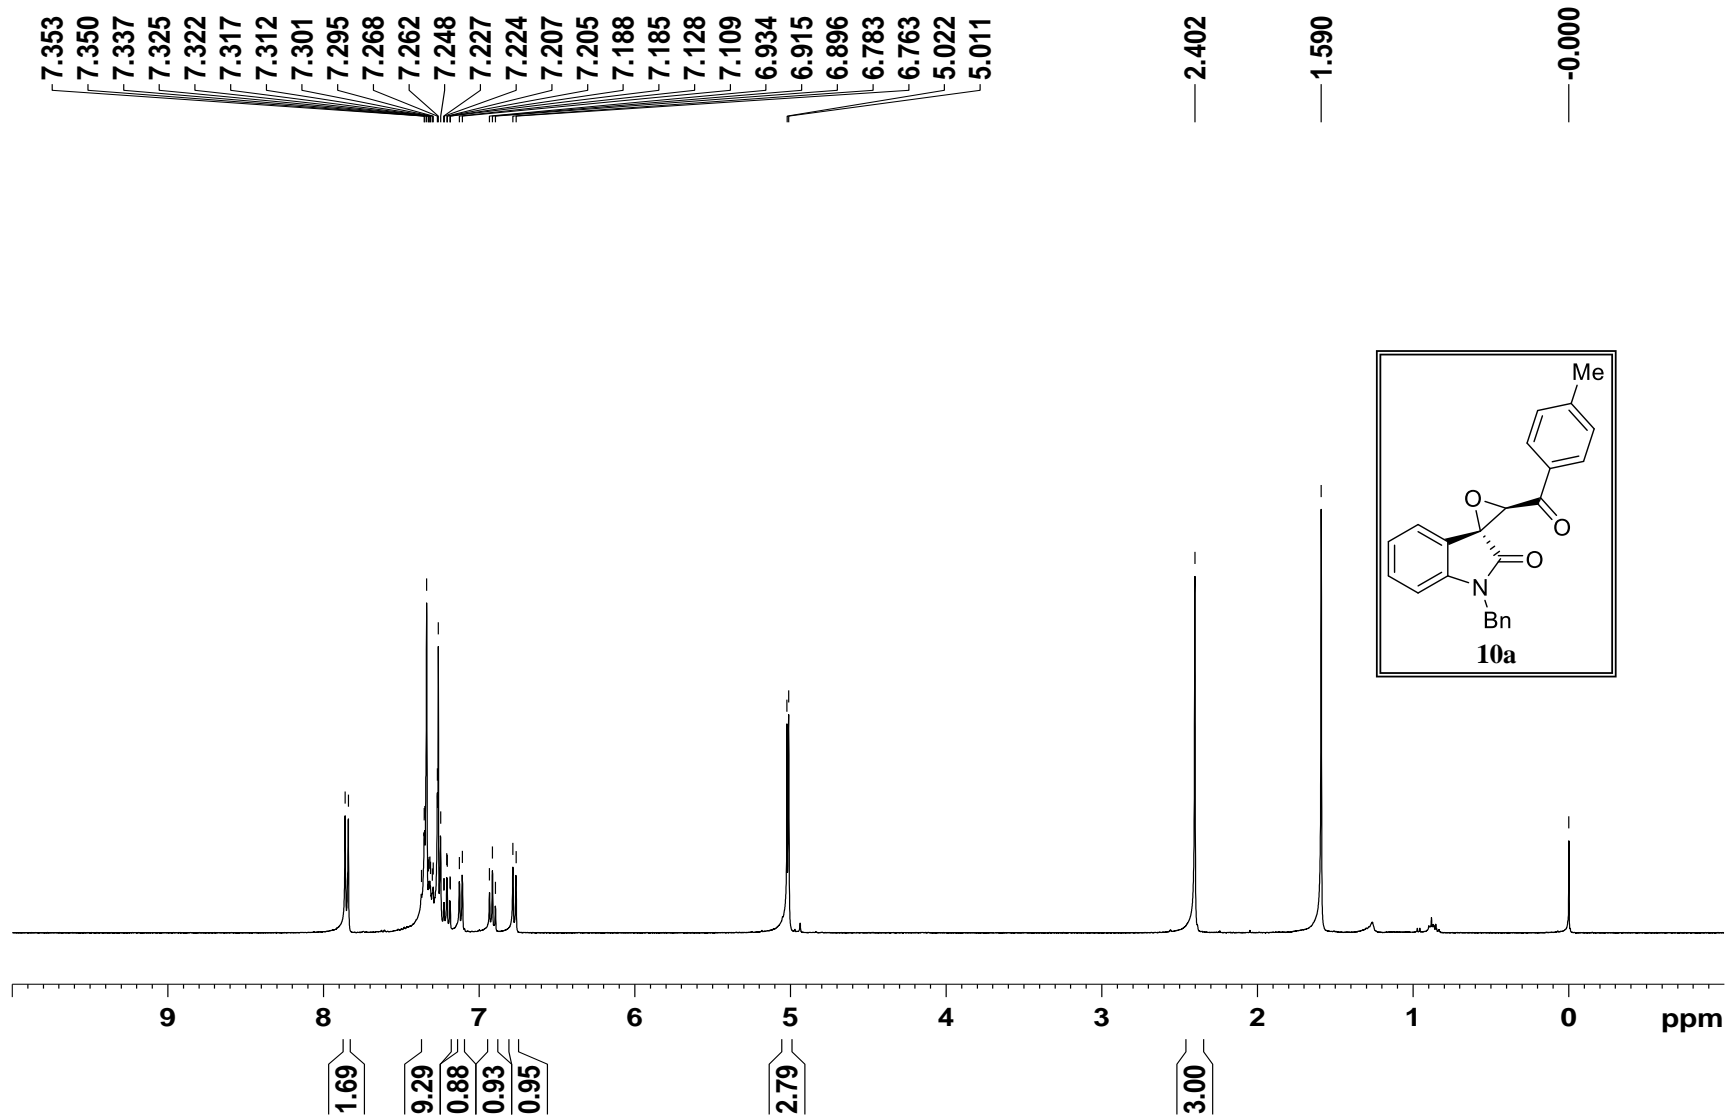

<sup>13</sup>C NMR spectrum of **10a**

apr-512 C13CPD CDC13 6/9/2020

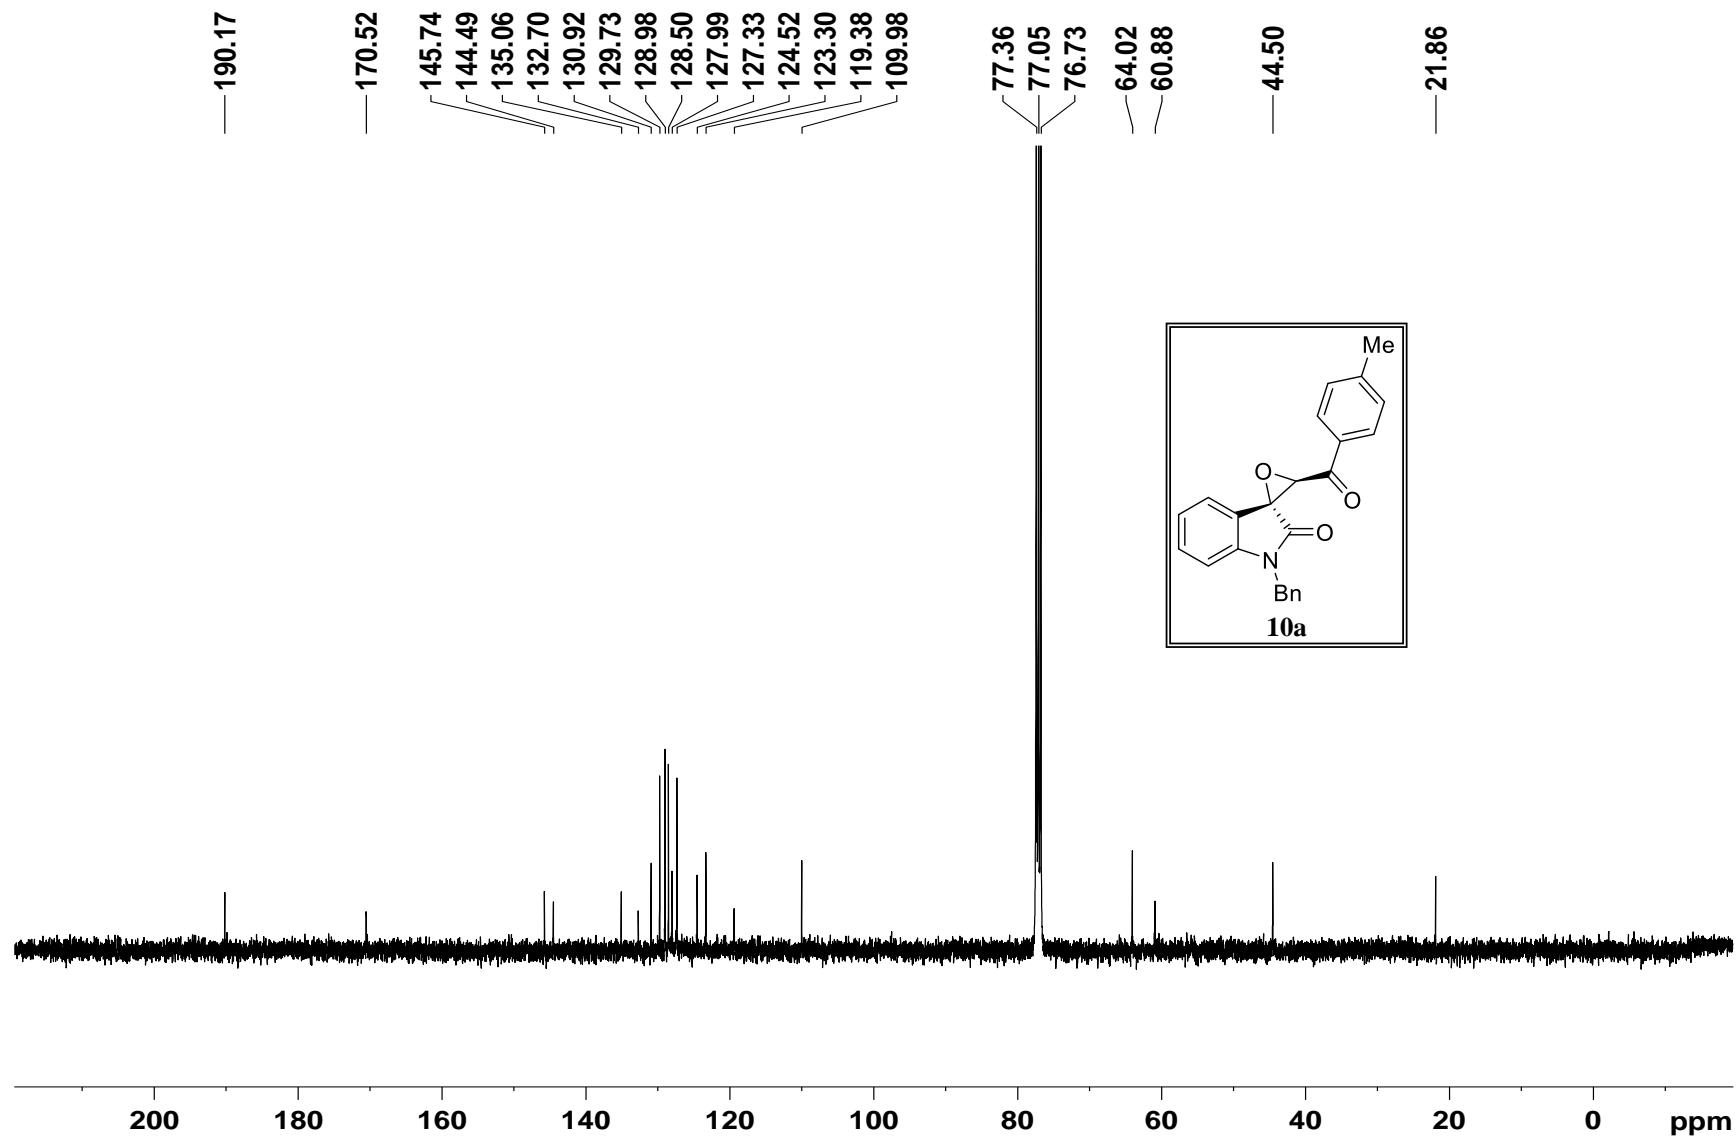

<sup>1</sup>H NMR spectrum of **10b**

apr-533 PROTON CDC13 11/10/2019

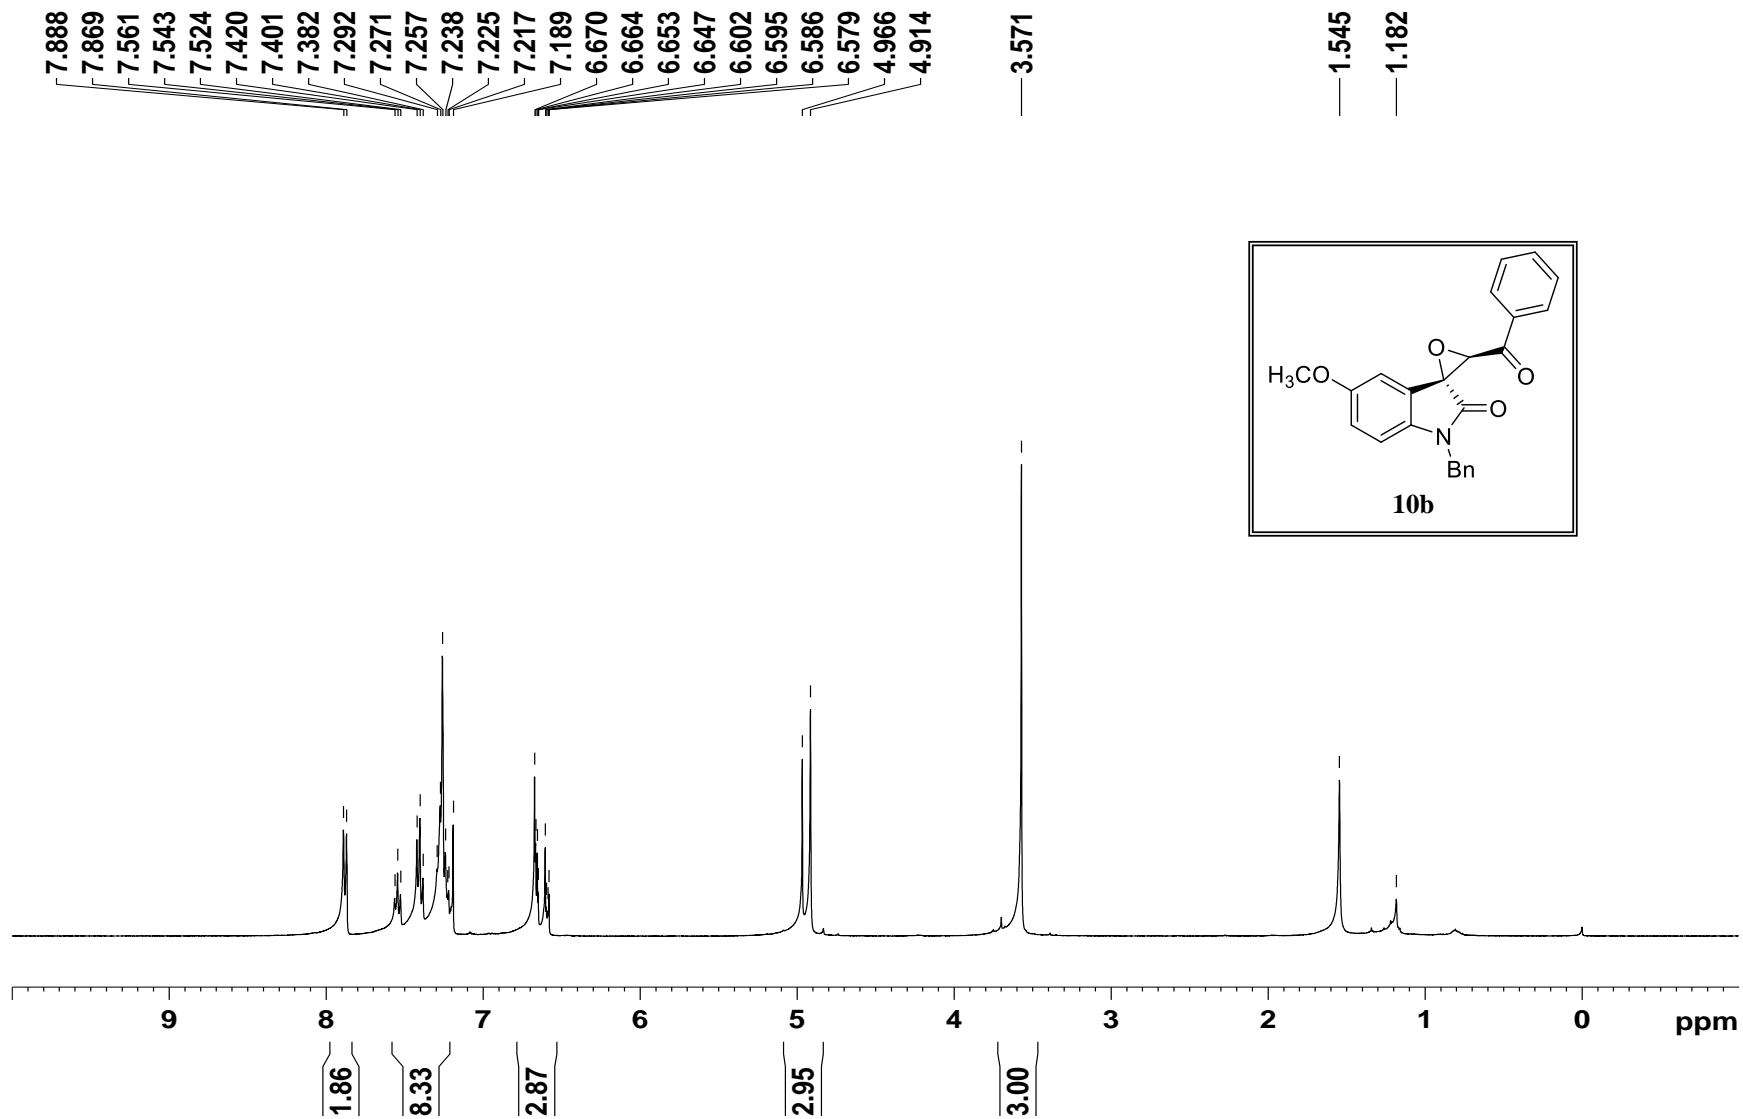

<sup>13</sup>C NMR spectrum of **10b**

apr-533 C13CPD CDC13 11/10/2019

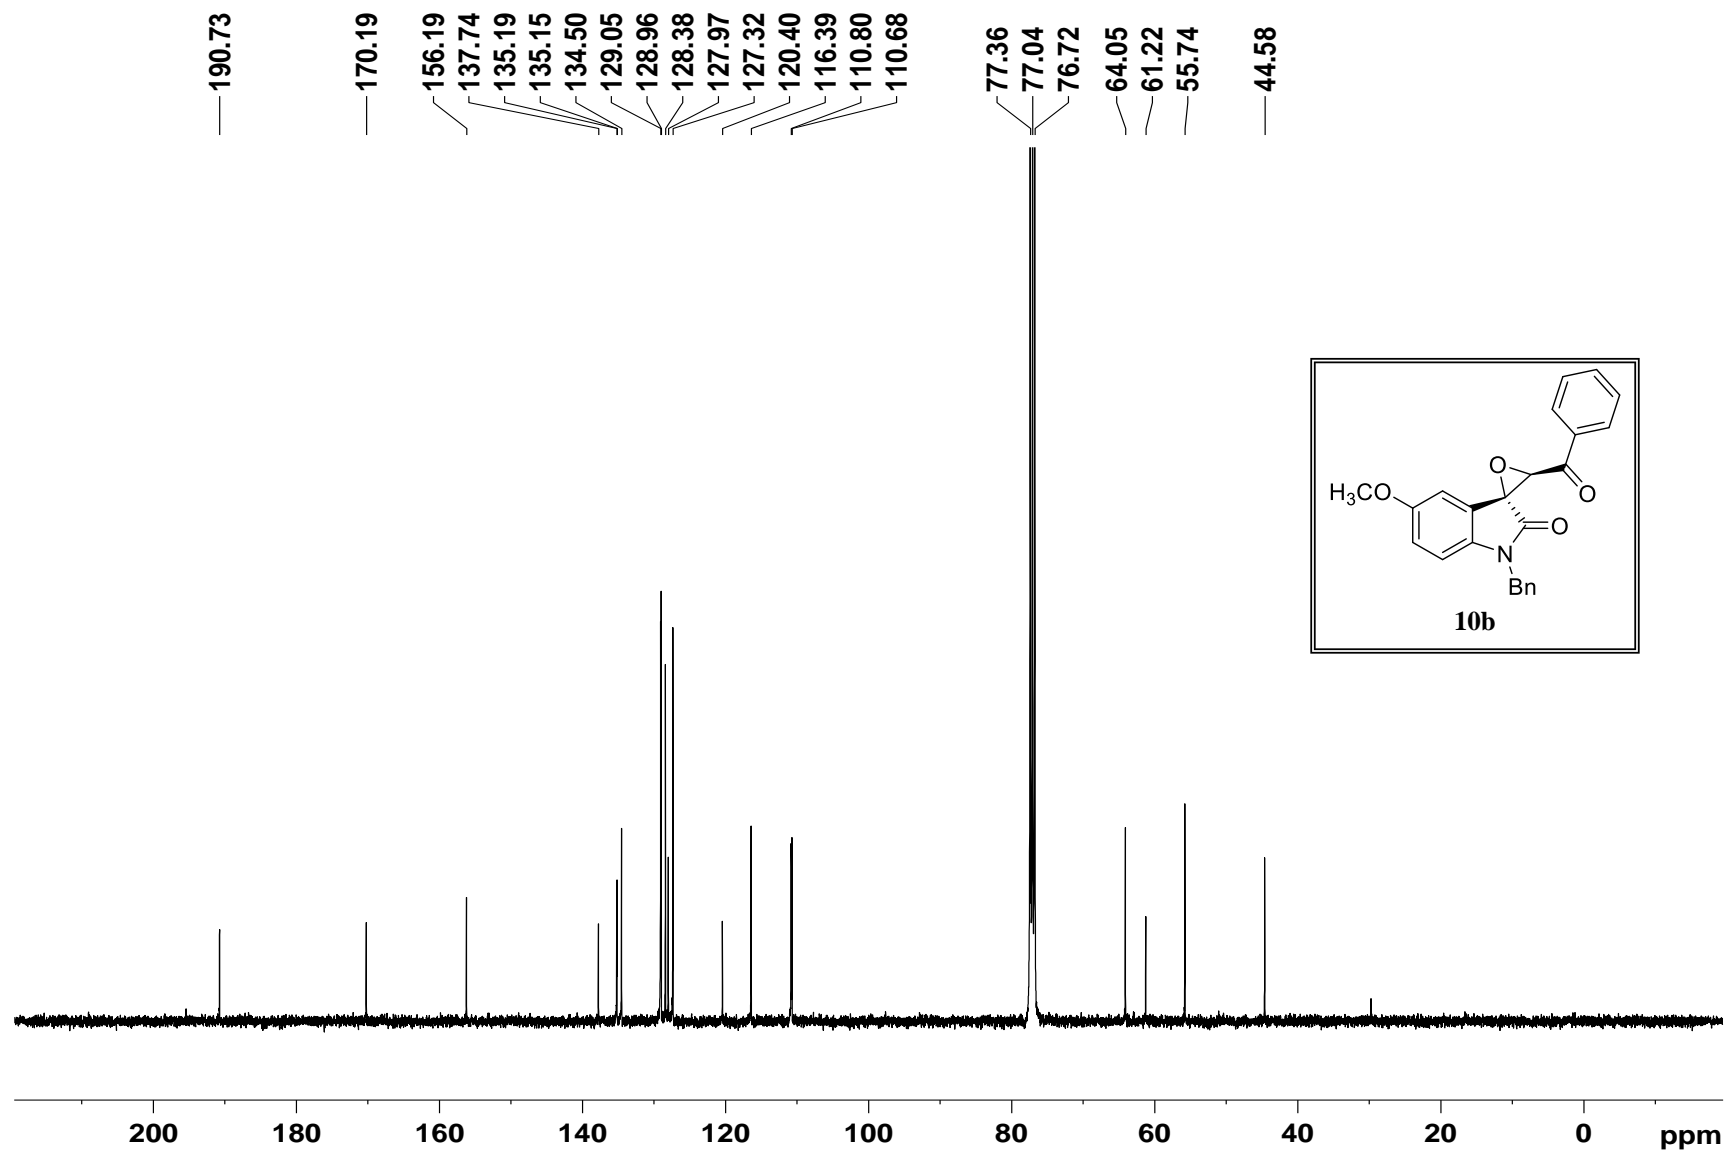

<sup>1</sup>H NMR spectrum of **10c**

apr-538 PROTON CDC13 11/11/2019

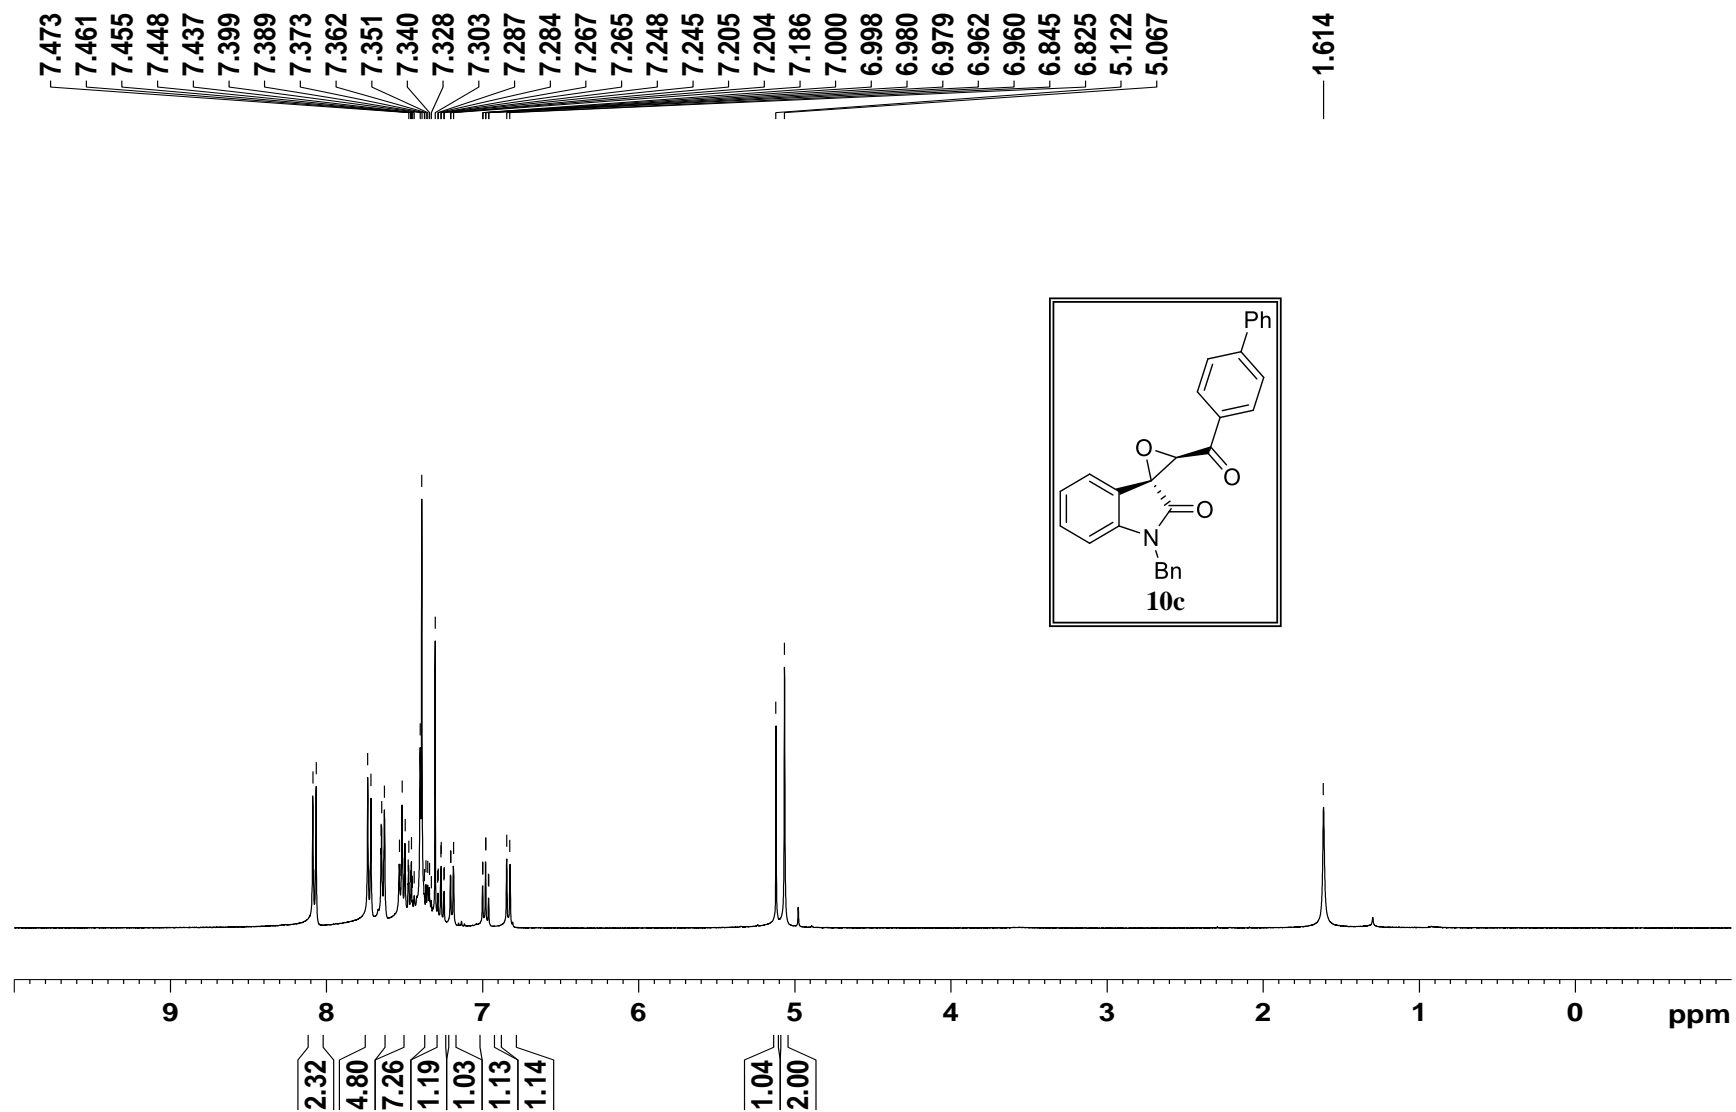

<sup>13</sup>C NMR spectrum of **10c**

apr-538 C13CPD CDC13 11/11/2019

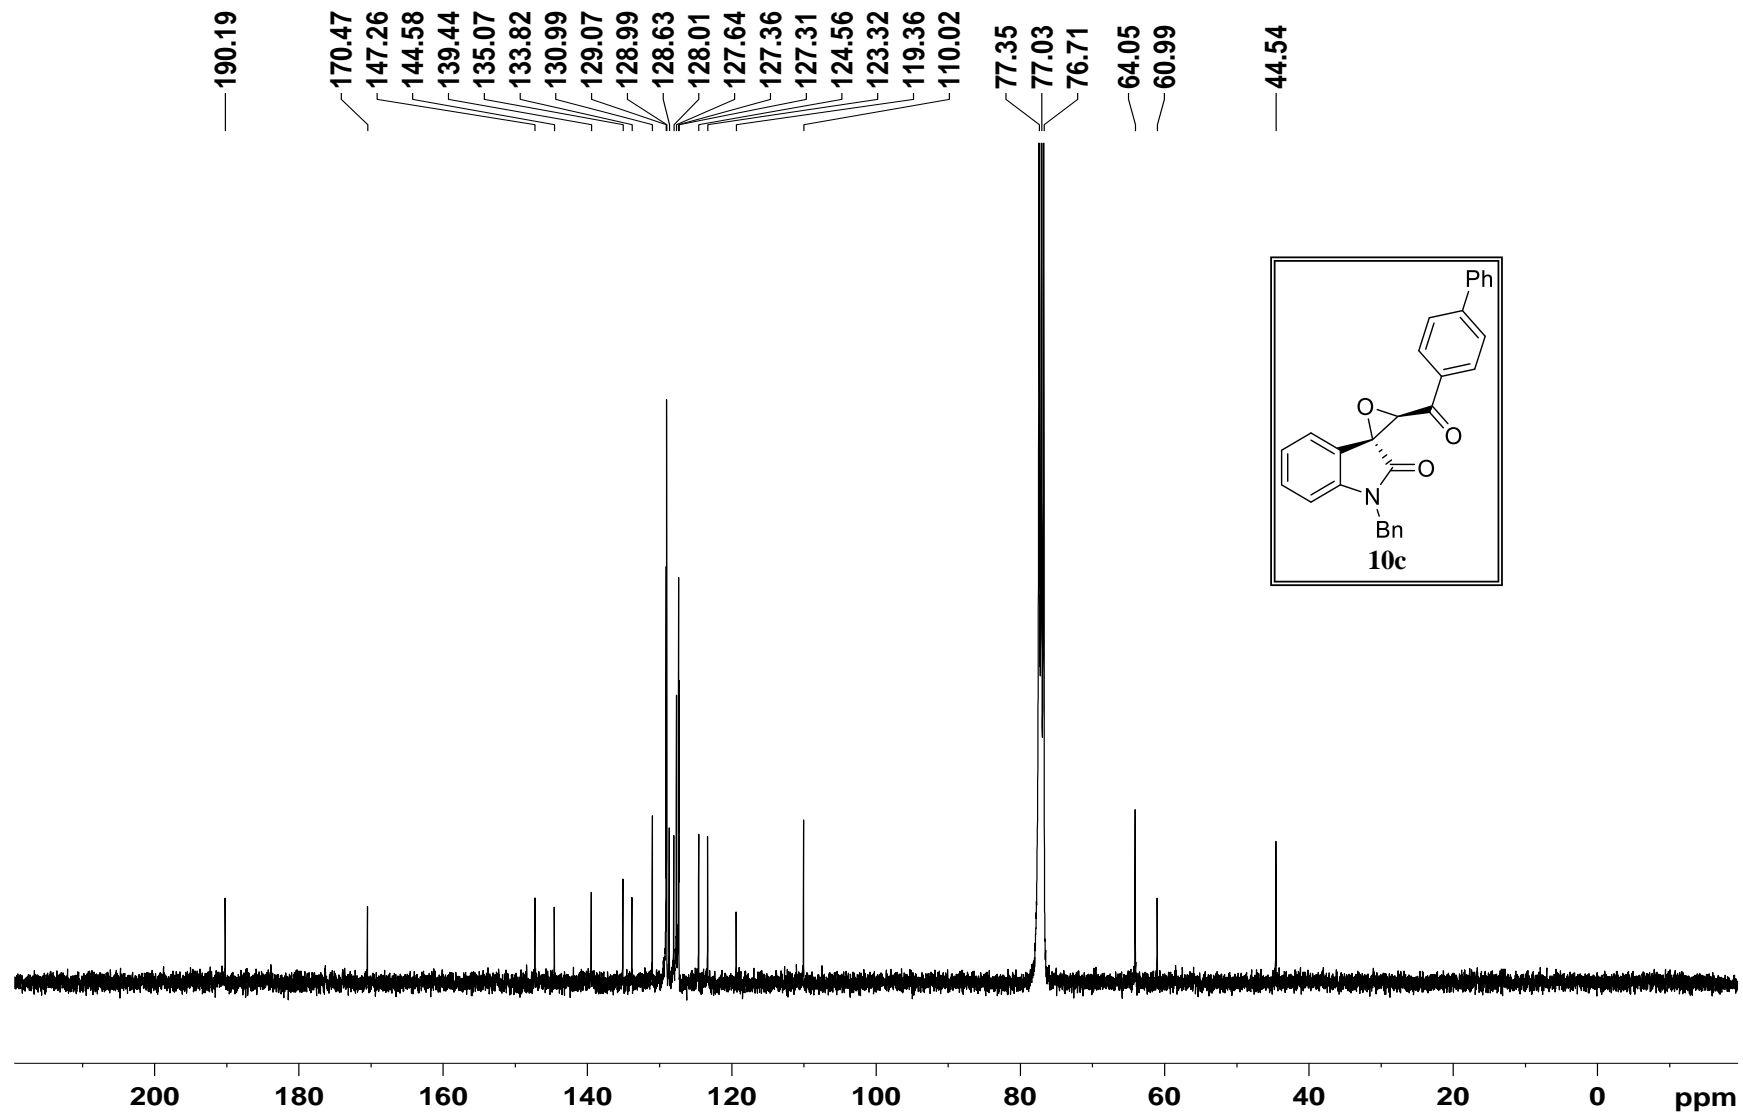



<sup>1</sup>H NMR spectrum of **10d**

APr-569(2) PROTON CDC13 06/02/2020

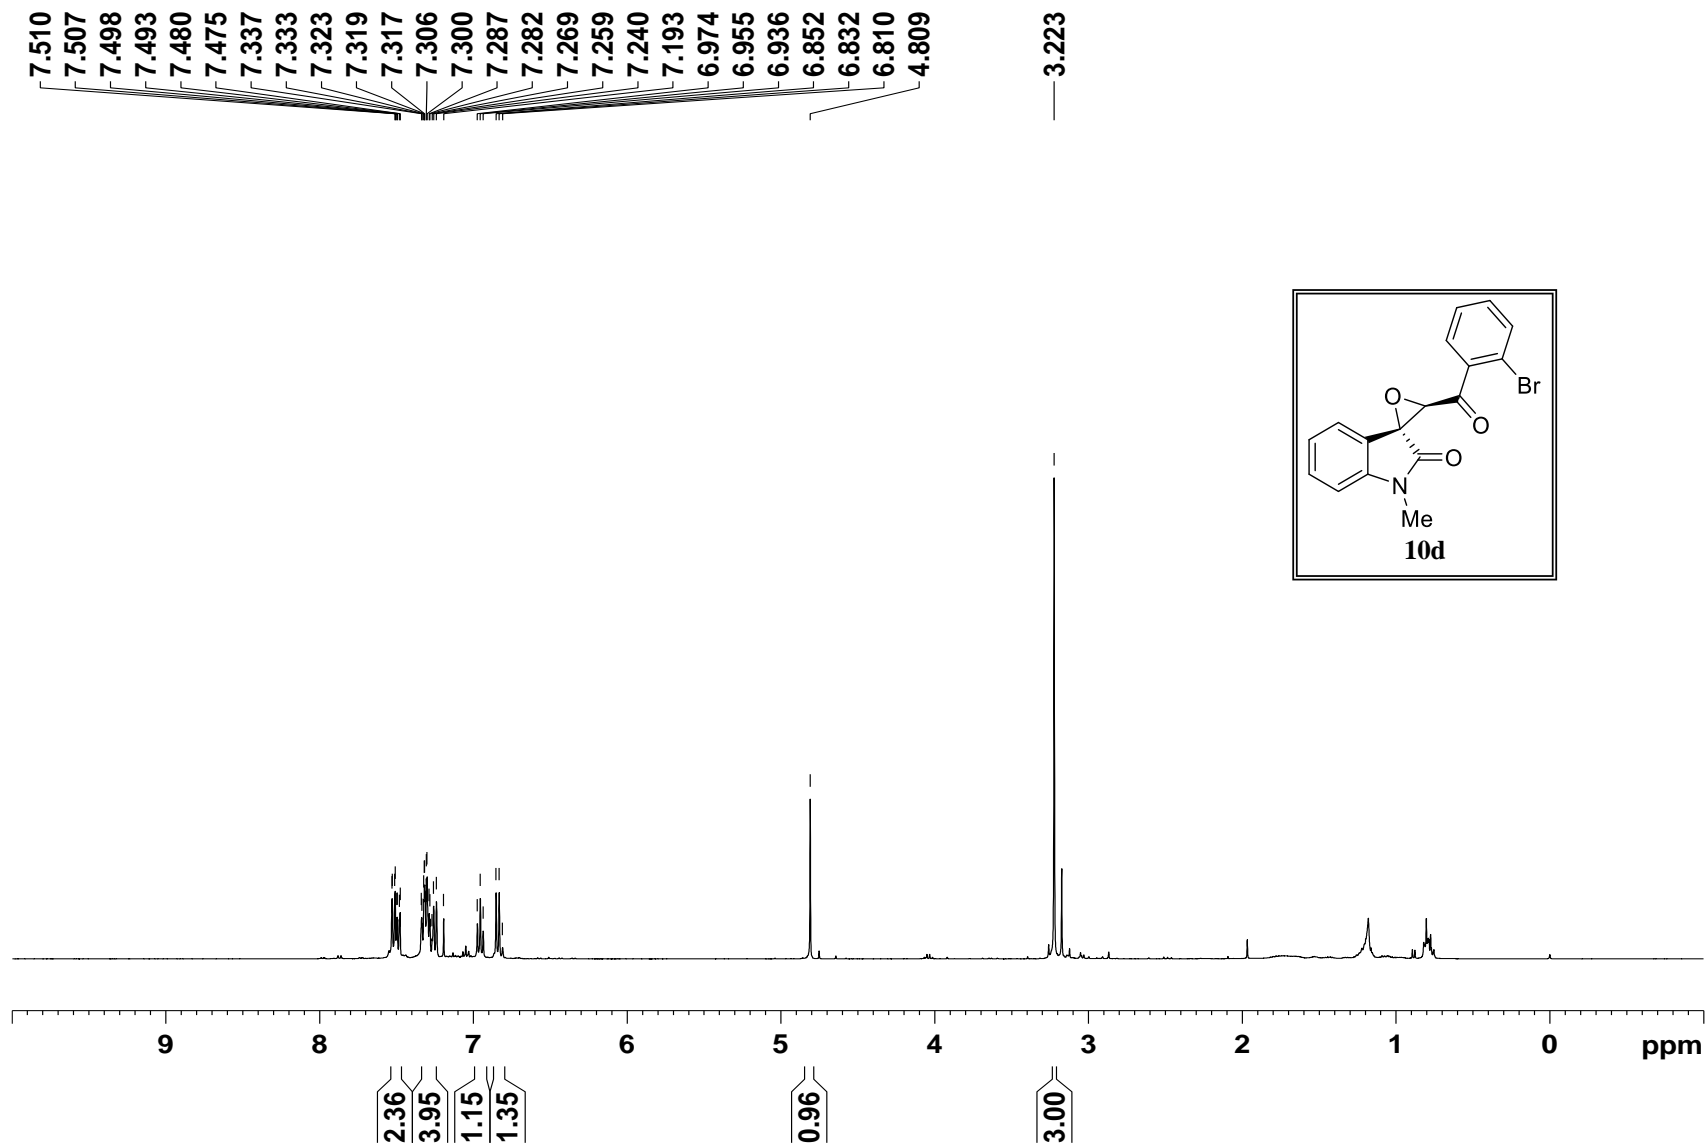

<sup>13</sup>C NMR spectrum of **10d**

APr-569(2) C13CPD CDC13 6/2/2020

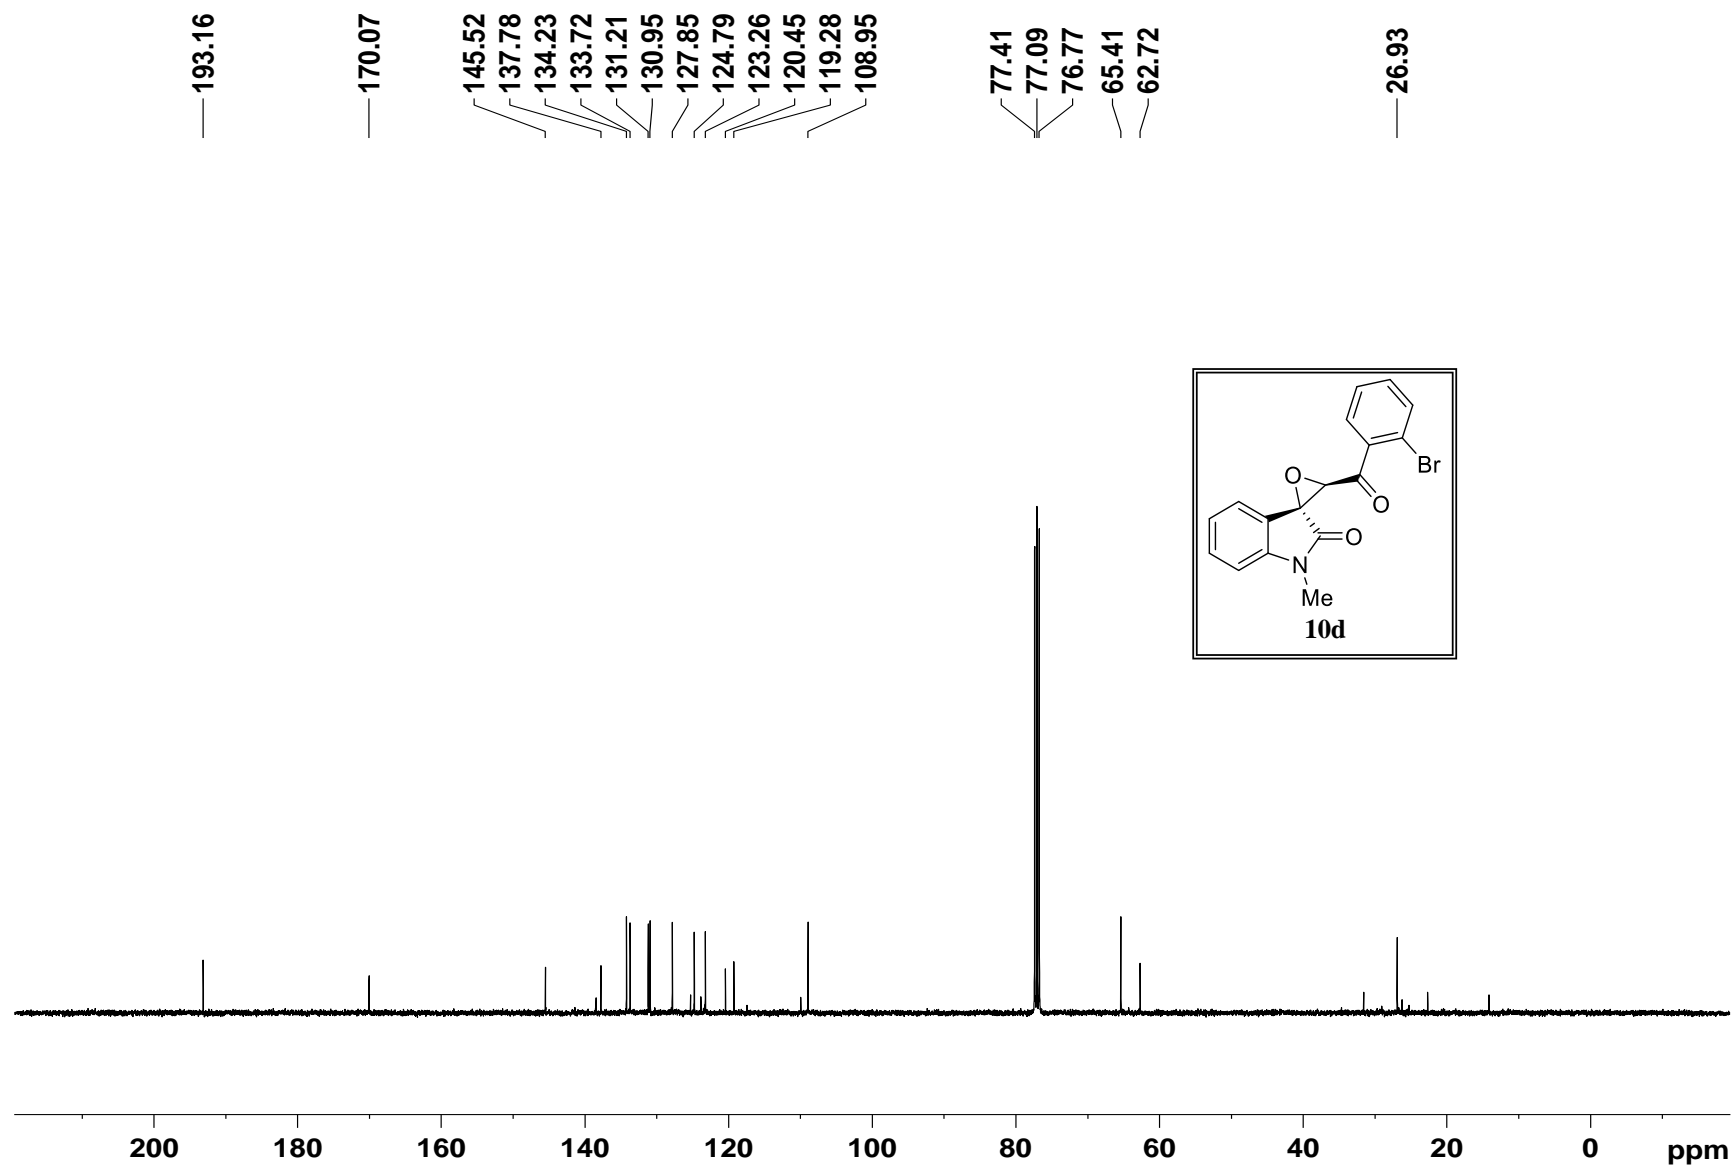

<sup>1</sup>H NMR spectrum of **10e**

apr-543 PROTON CDC13 30/10/2019

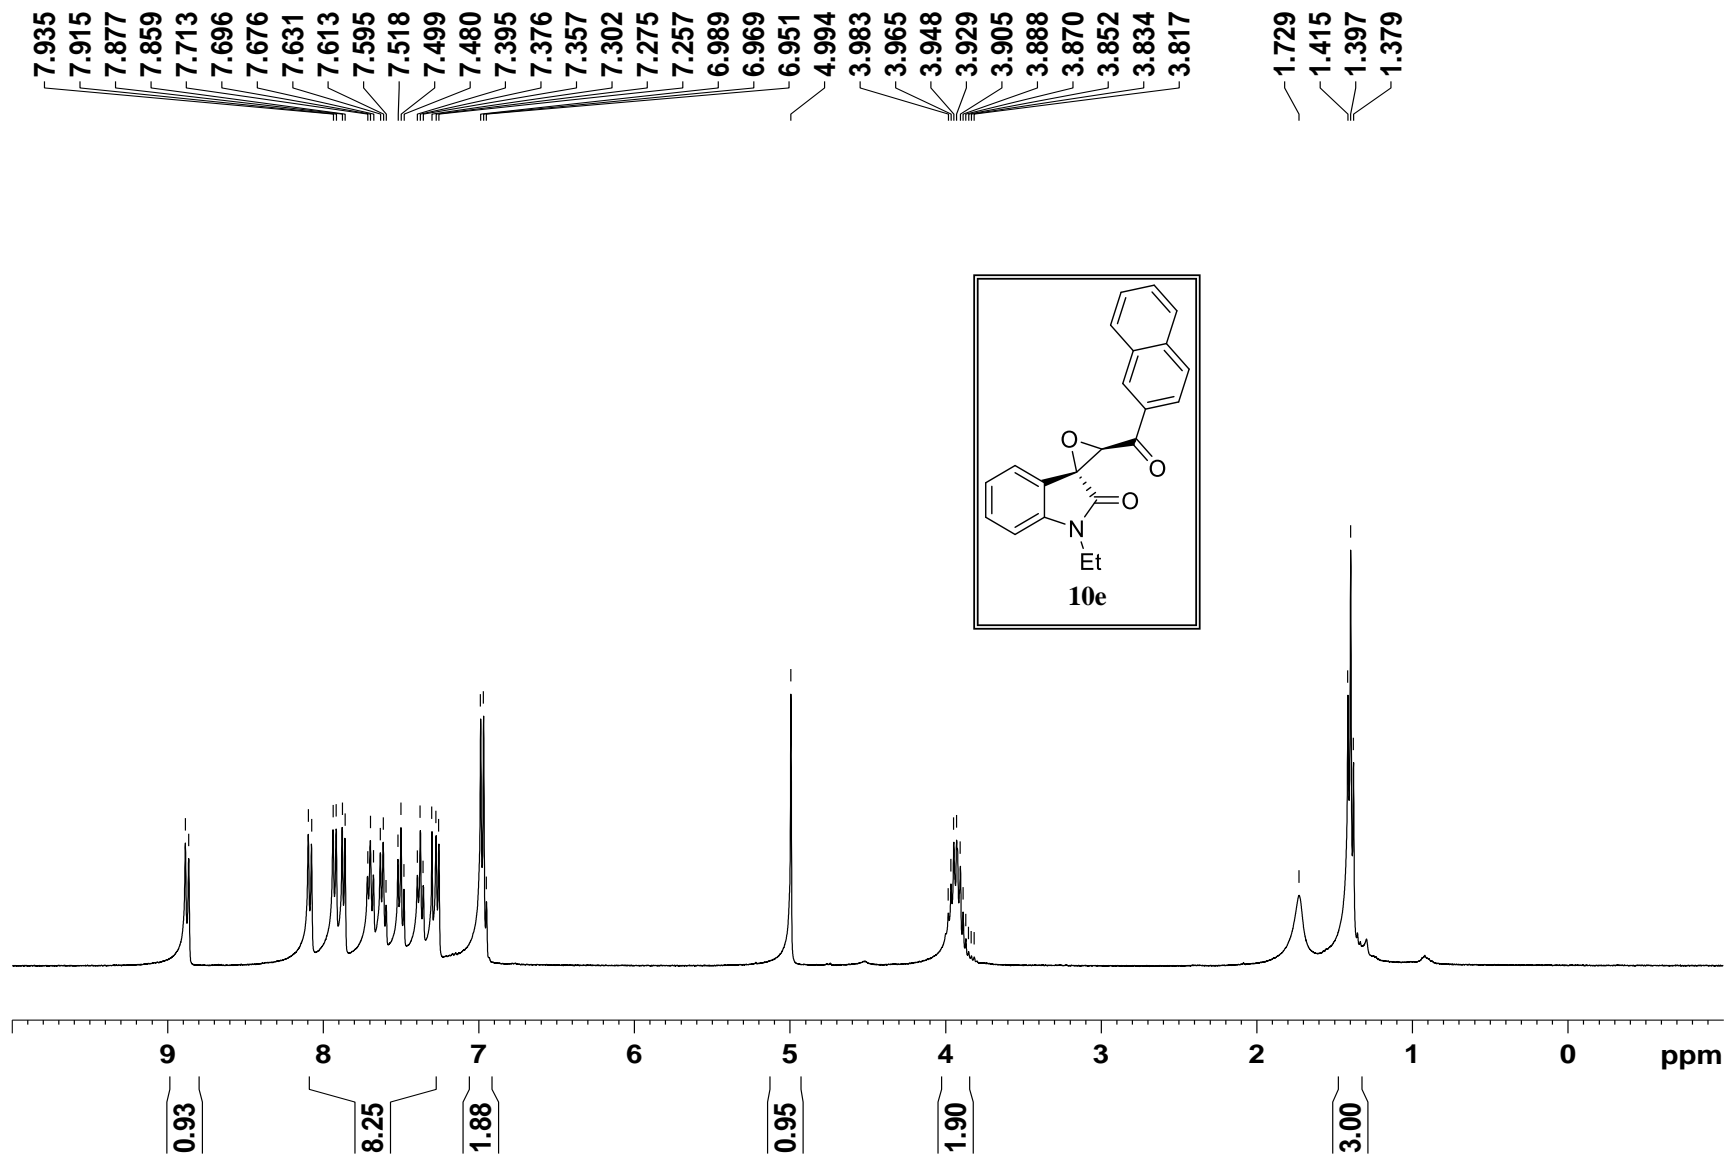

<sup>13</sup>C NMR spectrum of **10e**

apr-543 C13CPD CDC13 30/10/2019

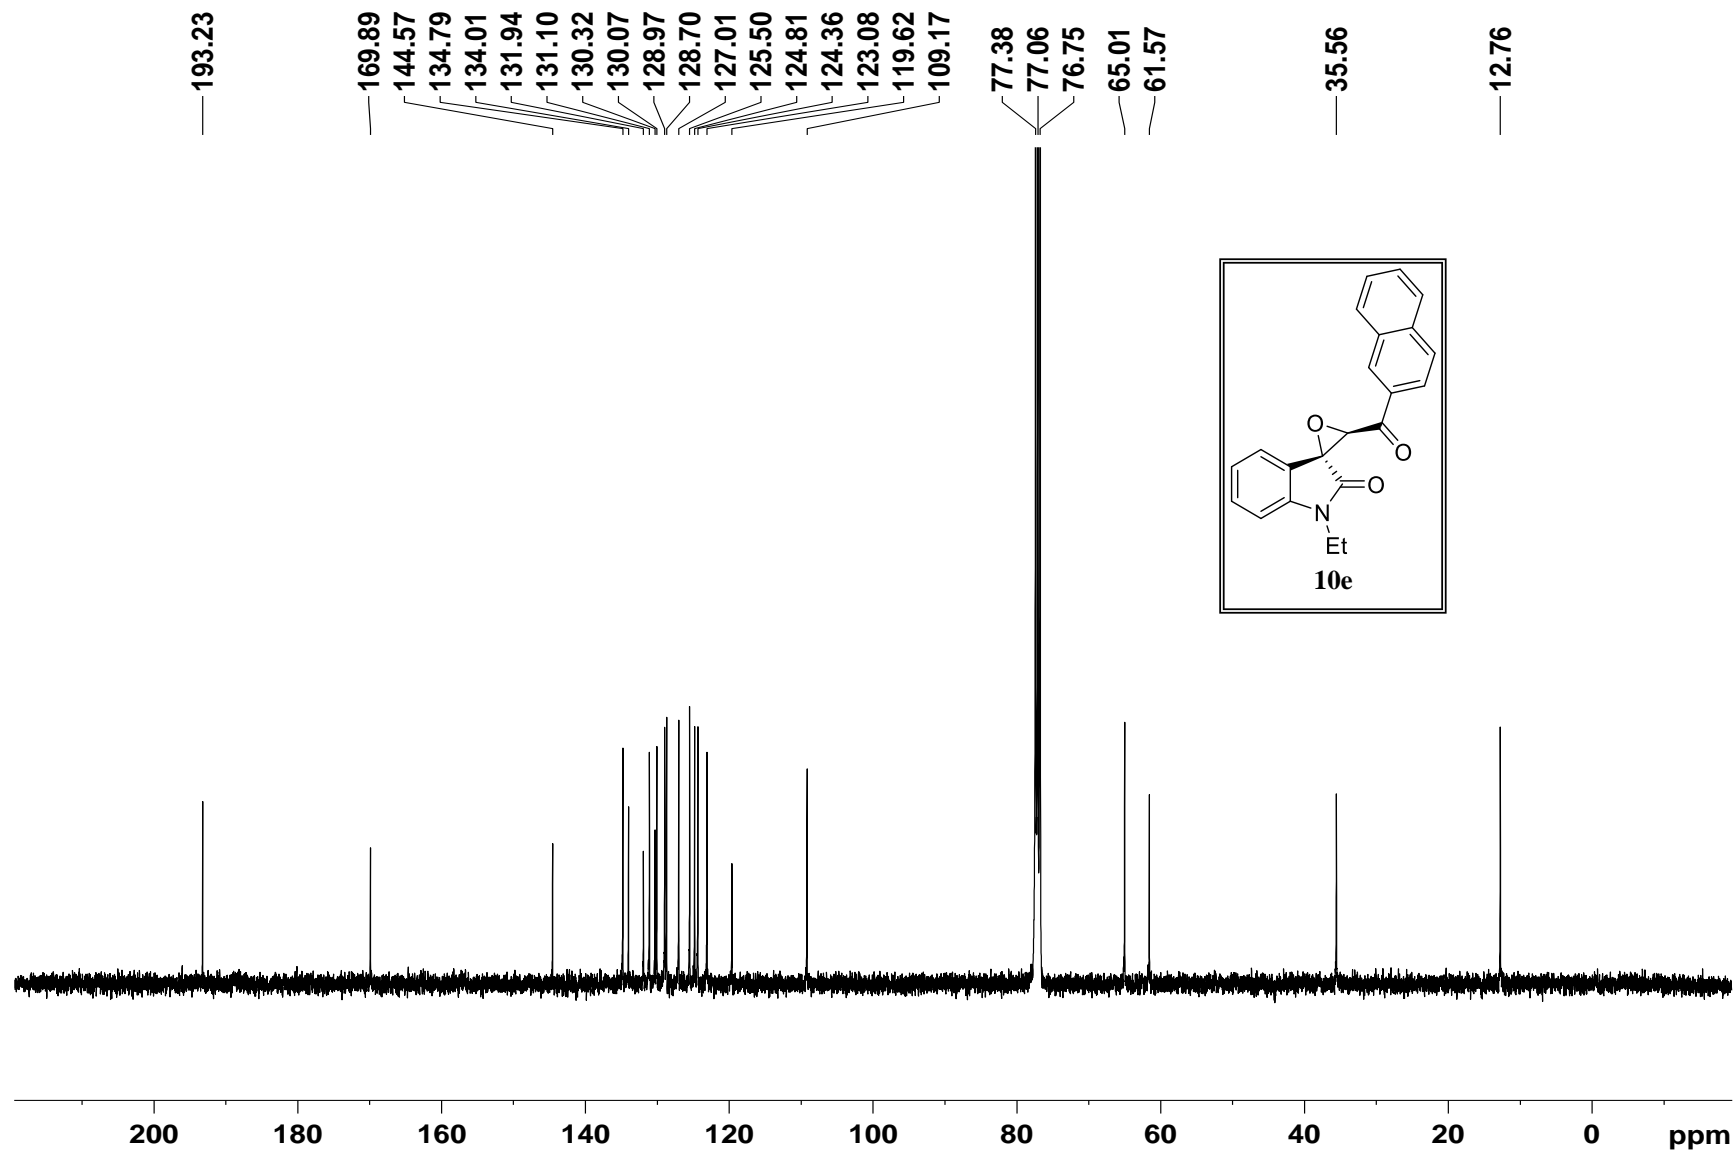

<sup>1</sup>H NMR spectrum of **11a**

trial-3 PROTON CDC13 22/12/2018

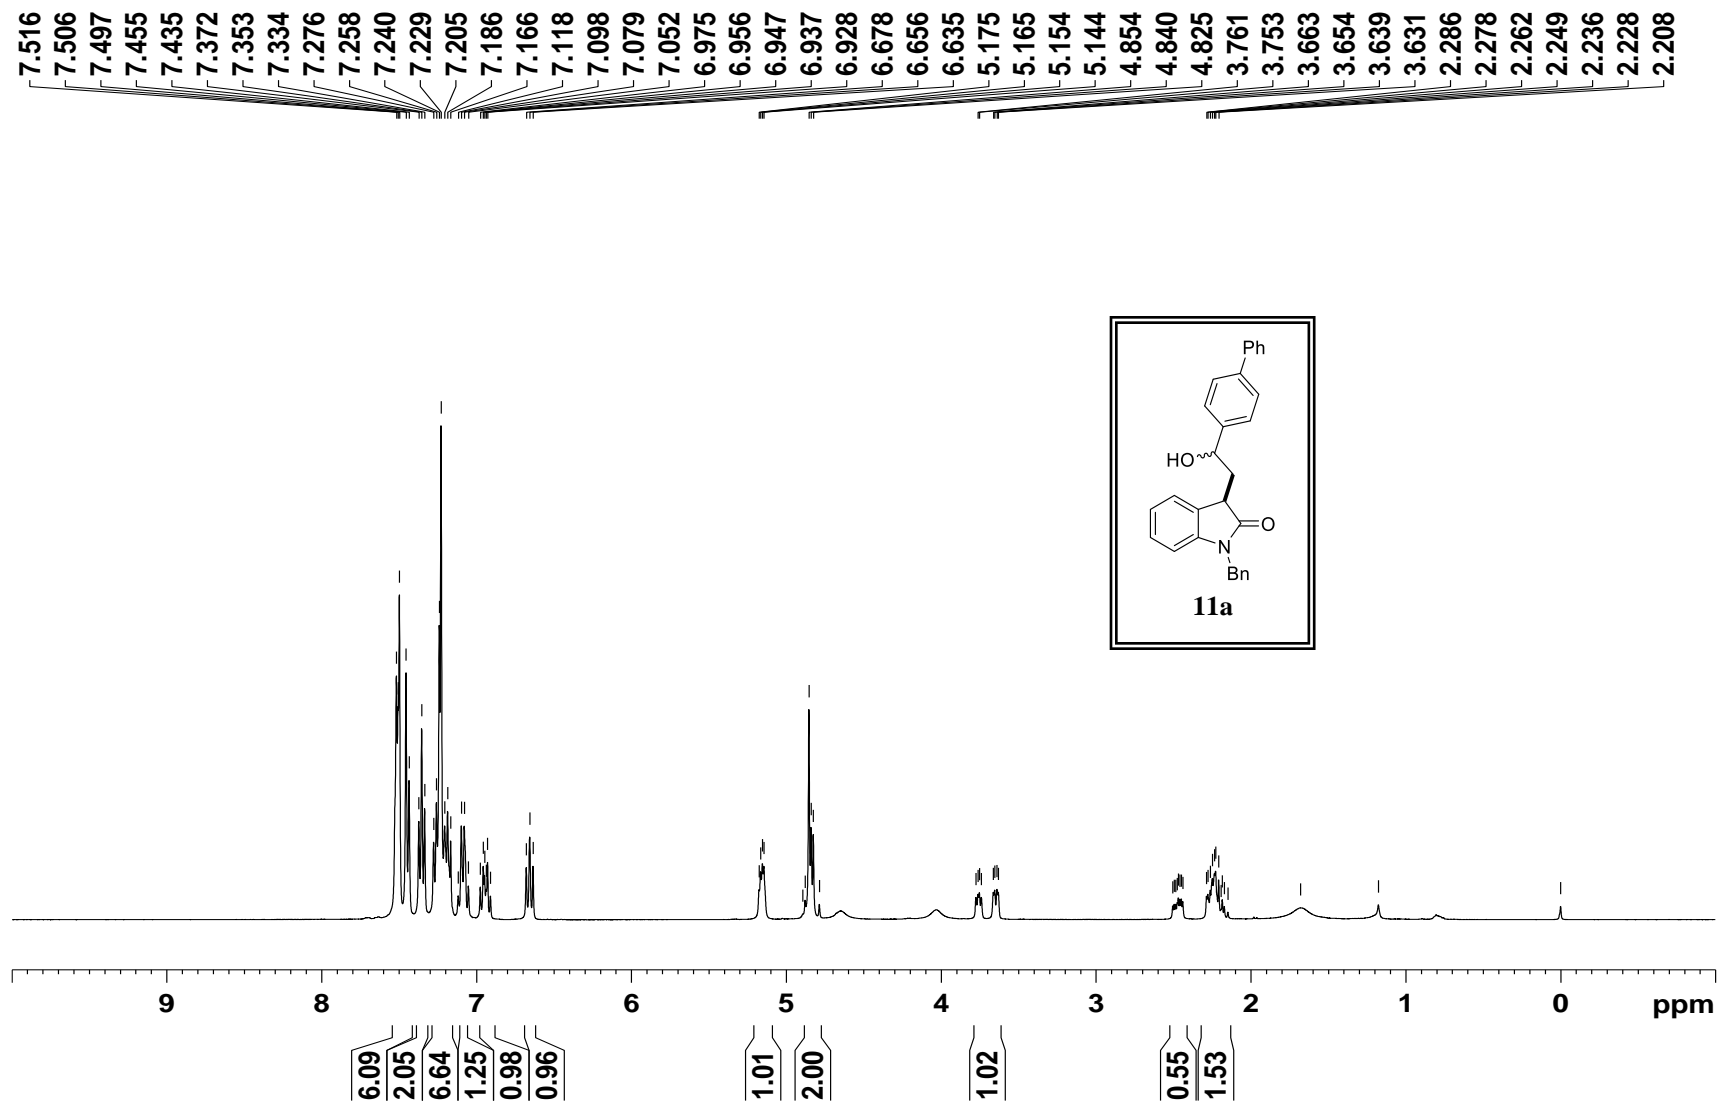

<sup>13</sup>C NMR spectrum of **11a**

trial-3 C13CPD CDC13 22/12/2018

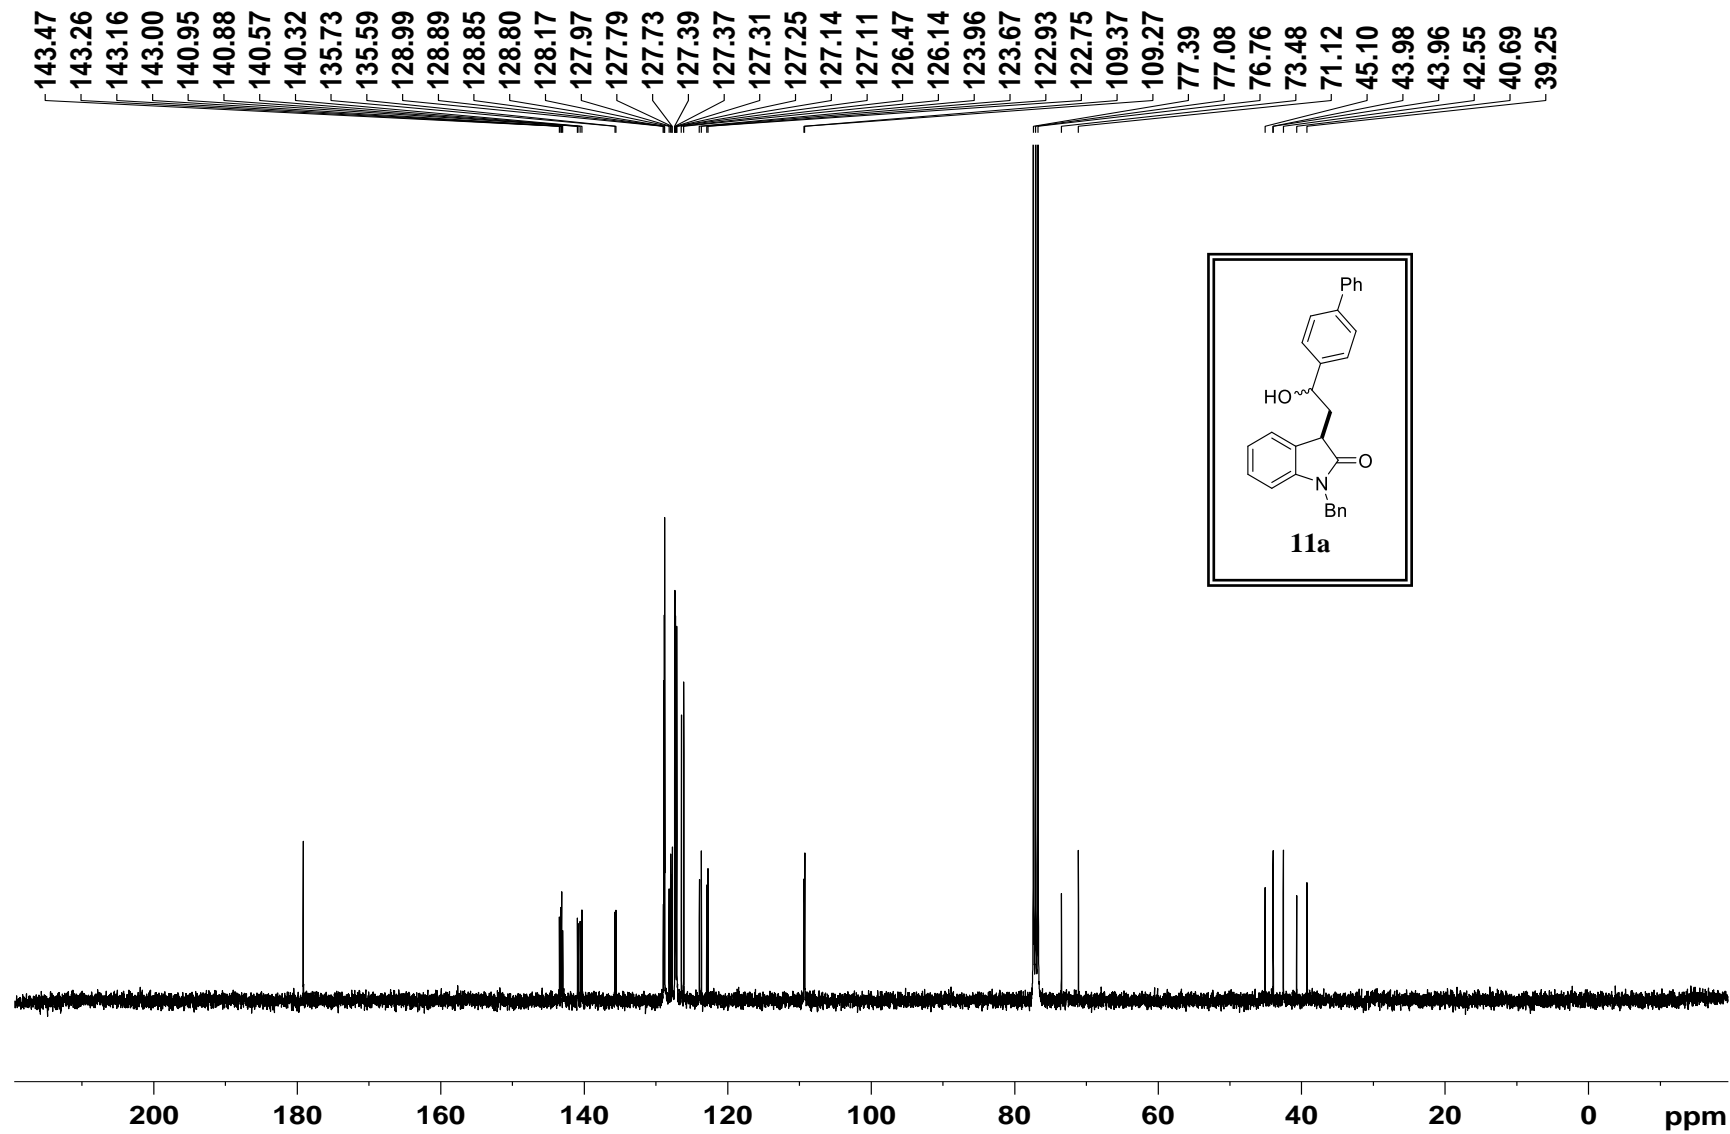

<sup>1</sup>H NMR spectrum of **11b**

apr-695 PROTON CDC13 26/2/2021

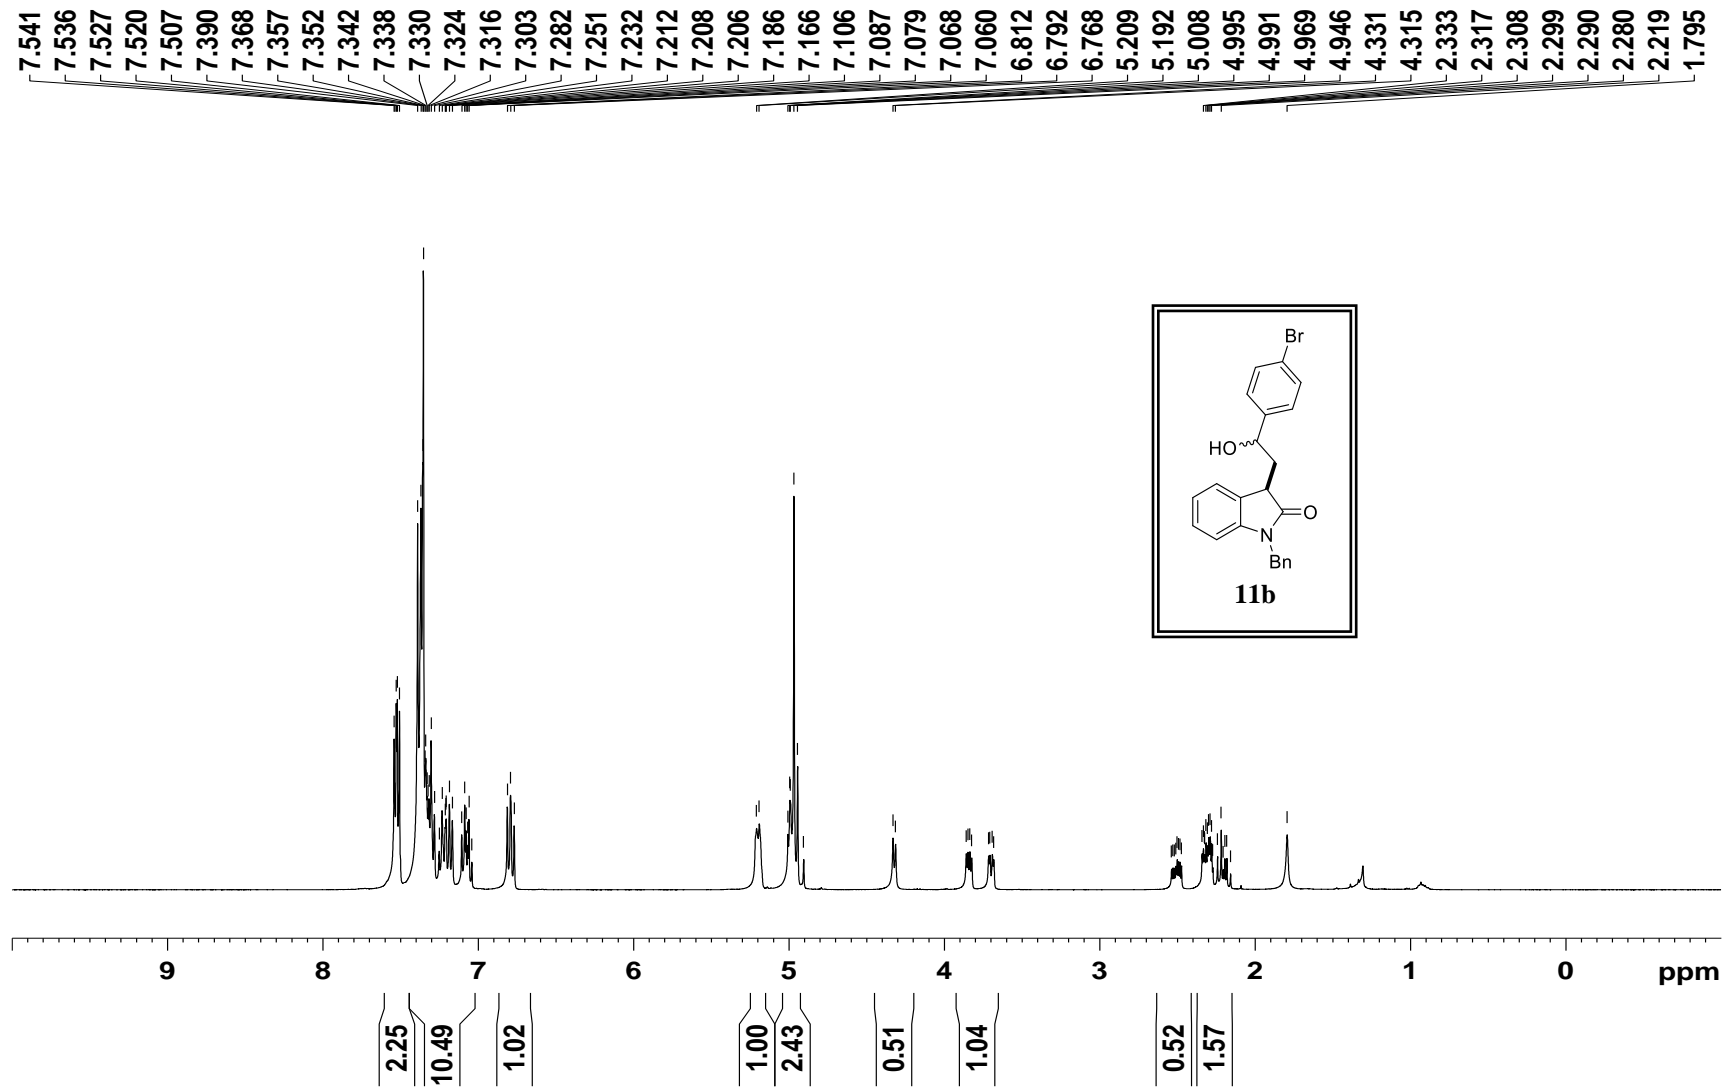

<sup>13</sup>C NMR spectrum of **11b**

apr-695 C13CPD CDC13 26/02/2021

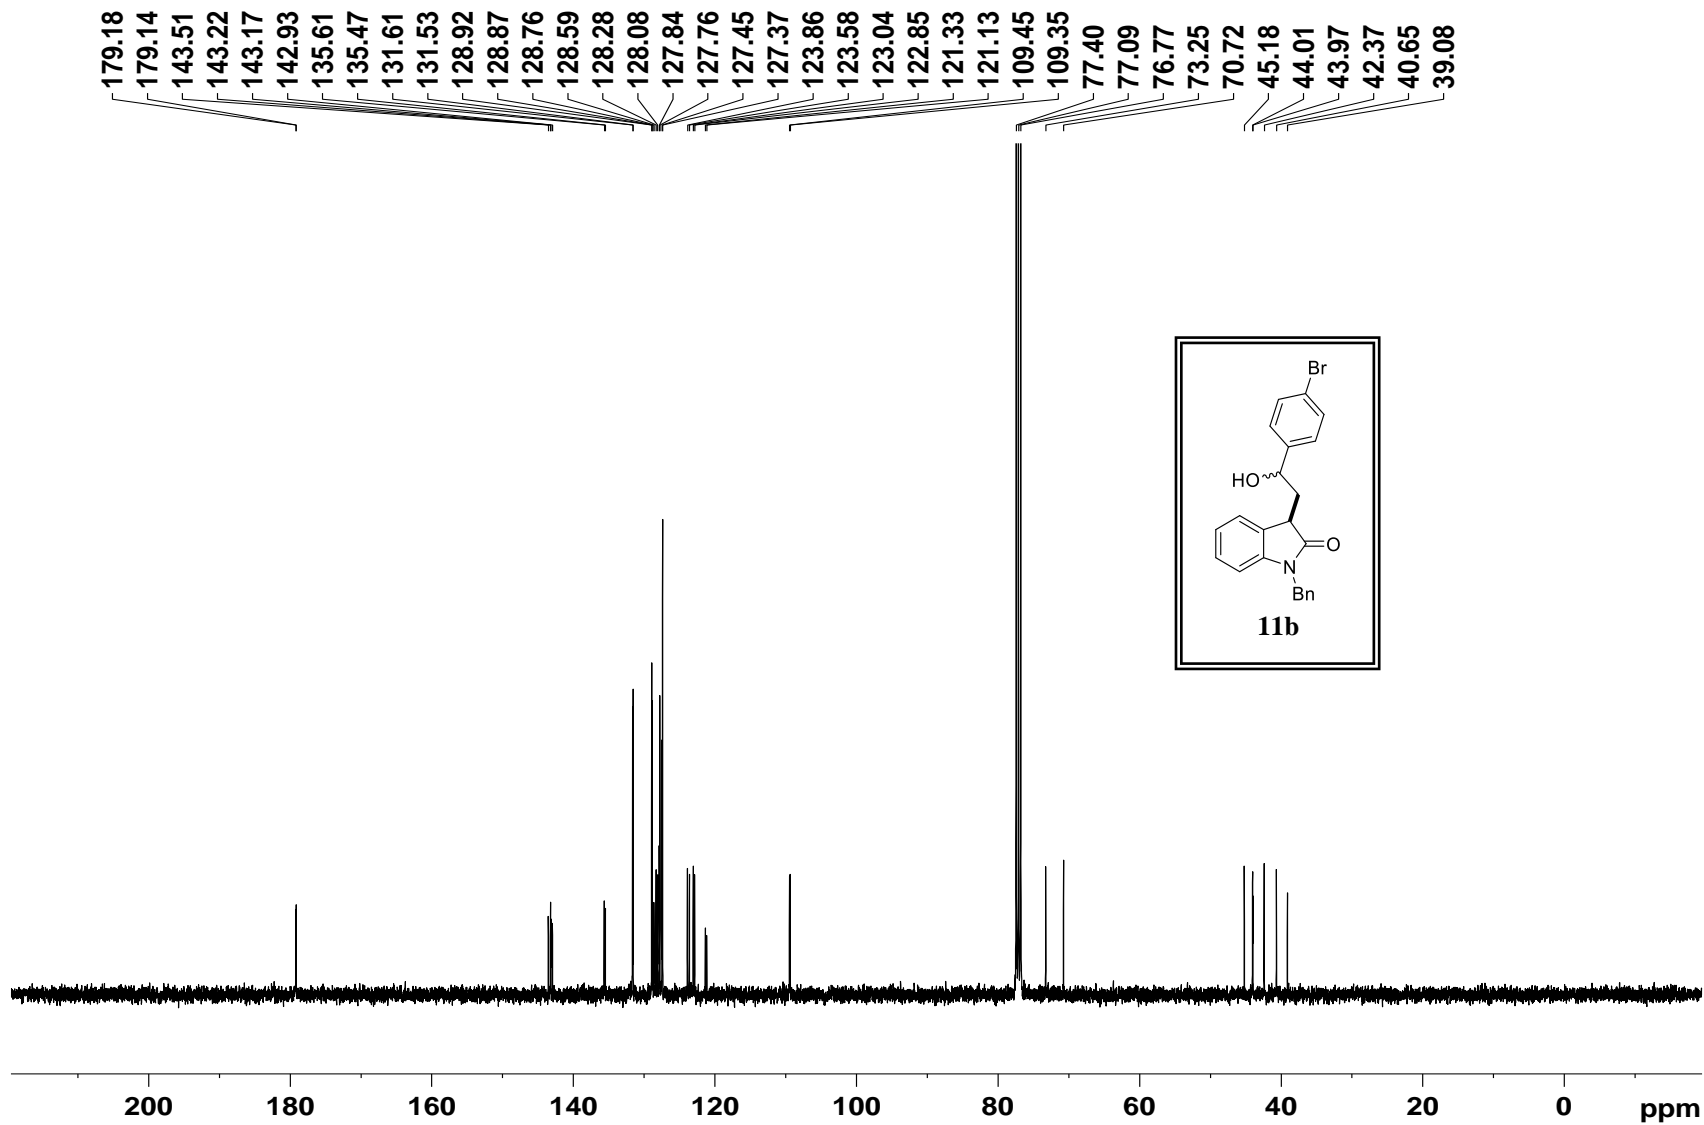



<sup>1</sup>H NMR spectrum of **12**

apr-540 PROTON CDC13 5/11/2019

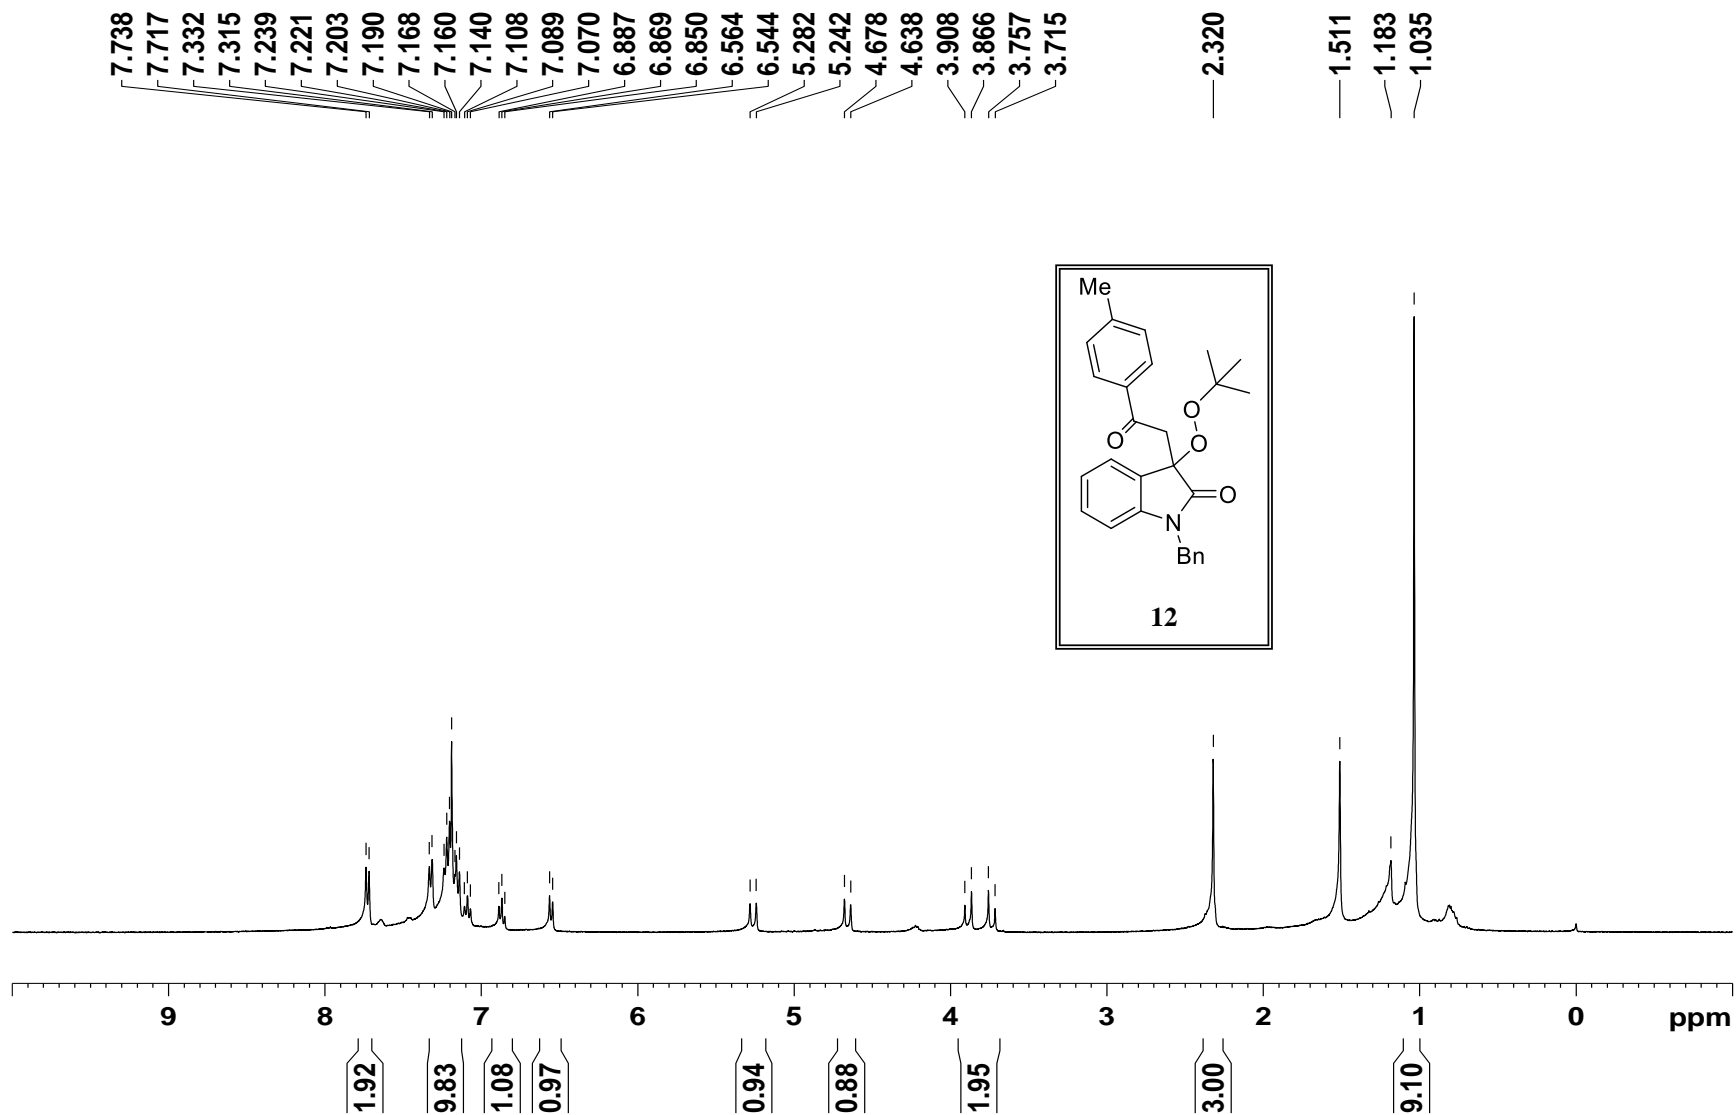

<sup>13</sup>C NMR spectrum of **12**

apr-540 C13CPD CDC13 5/11/2019

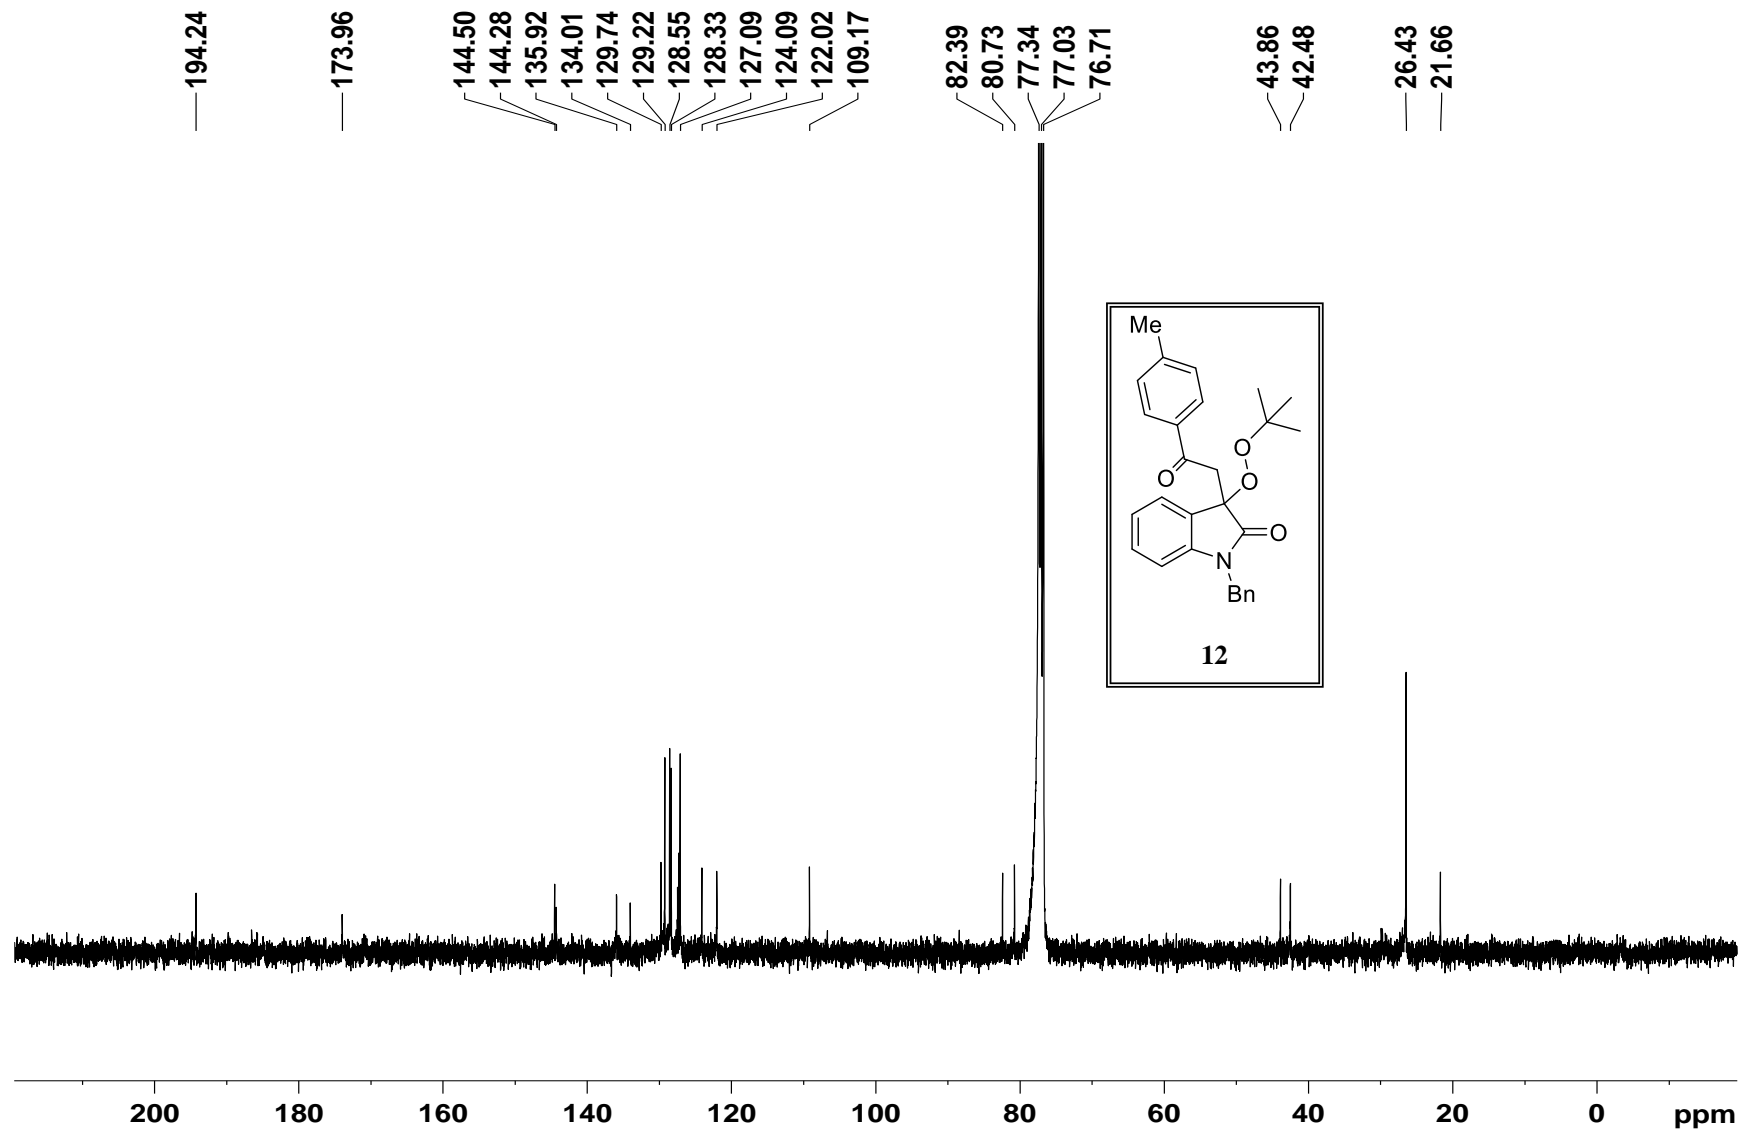

194.24

173.96

144.50

144.28

135.92

134.01

129.74

129.22

128.55

128.33

127.09

124.09

122.02

109.17

82.39

80.73

77.34

77.03

76.71

43.86

42.48

26.43

21.66

<sup>1</sup>H NMR spectrum of **13**

apr-602 PROTON CDC13 8/1/2021

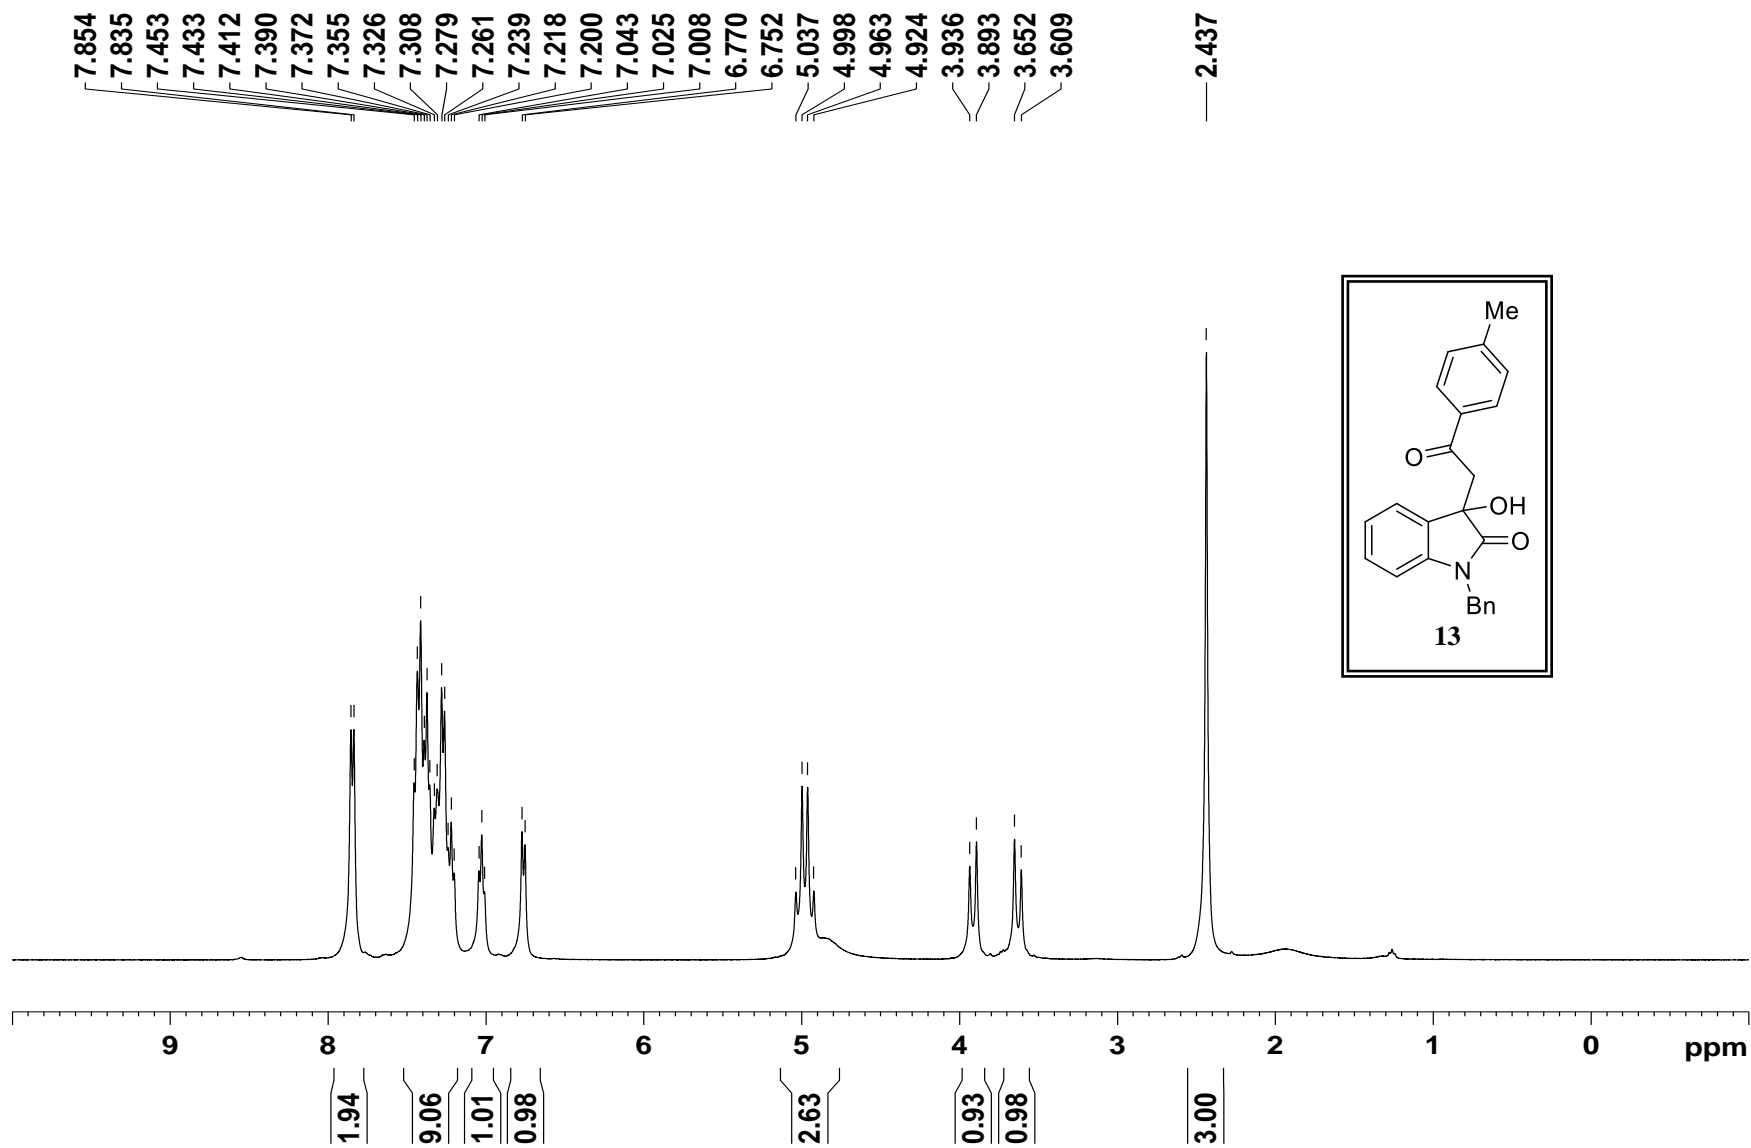

$^{13}\text{C}$  NMR spectrum of **13**

apr-602 C13CPD CDC13 8/1/2021

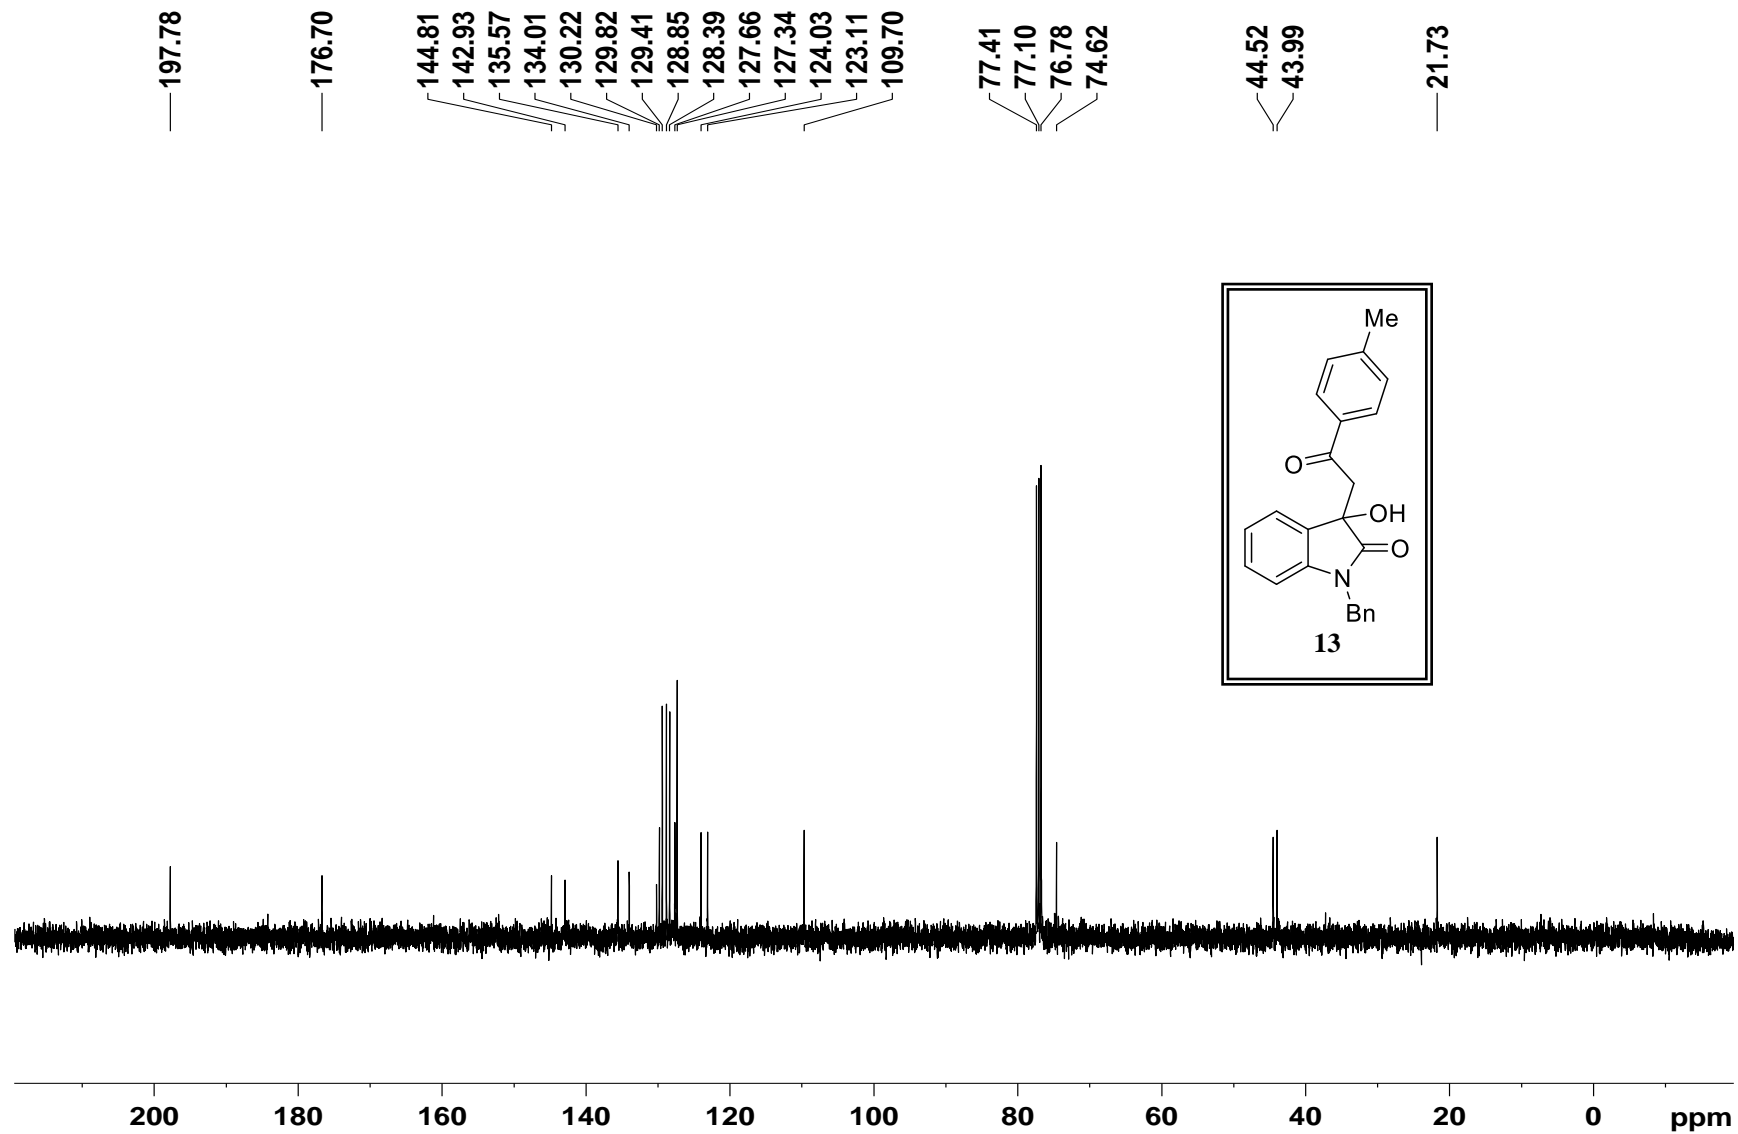

## References

1. Cava, M. P.; Little, R. L.; Naipier, D. R. *J. Am. Chem. Soc.* **1958**, 80, 2257.
2. Kazi, I.; Guha, S.; Sekar, G. *Org. Lett.* **2017**, 19, 1244 and references cited therein.
3. Cao, S-H.; Zhang, X-C.; Wei, Y.; Shi, M. *Eur. J. Org. Chem.* **2011**, 2668.
4. Gandikota, N. M.; Bollaa, R. S.; Bandyopadhyay, A.; Viswanath, I. V. K. *Russian Journal of Organic Chemistry*, **2019**, 55, 1197.
5. Tan, B.; Candeias, N. R.; Barbas, C. F. *Nature Chem.* **2011**, 3, 473.
6. Shao, J.; Luo, Q.; Bi, H.; Wang, S. R. *Org. Lett.* **2021**, 23, 459.
7. Empel, C.; Verspeek, D.; Jana, S.; Koenigs, R. M. *Adv. Synth. Catal.* **2020**, 362, 4716.
